# Supplementary material for: Genomic epidemiology of influenza B circulation in China during prolonged border closure from 2020 to 2021
Source: Research Square preprint supplement (doi:10.21203/rs.3.rs-1432770/v1), 2022-03-09
Supplement: Supplementary file 1 [file b01137be96445632c619ce9f.xlsx]

## Sheet: Victoria
Strain name	HA1 site 122
B/Sao_Paulo/3-26297/2015	-
B/Austria/896058/2016	-
B/Sao_Paulo/89069/2015	-
B/Sao_Paulo/3070/2016	-
B/Sao_Paulo/10-1426/2016	-
B/Austria/908912/2016	-
B/Austria/907628/2016	-
B/Sao_Paulo/43972/2016	-
B/Moscow/CRIE-311/2016	-
B/Sao_Paulo/1170640-IAL/2019	-
B/Sao_Paulo/1882139-IAL/2019	-
B/Pedra_Bela/1075603-IAL/2019	-
B/Ara?atuba/1245277-IAL/2019	-
B/Marilia/1265106-IAL/2019	-
B/Mogi_das_Cruzes/1368473-IAL/2019	-
B/Sao_Paulo/1416149-IAL/2019	-
B/Mogi_das_Cruzes/1420217-IAL/2019	-
B/Brasilia/15880806-IAL/2019	-
B/Sao_Carlos/1456874-IAL/2020	-
B/Taubate/1424727-IAL/2019	-
B/Sao_Paulo/1435379-IAL/2020	-
B/Sao_Paulo/1453318-IAL/2020	-
B/Sao_Paulo/1444807-IAL/2020	-
B/Sao_Paulo/1462571-IAL/2020	-
B/Guarulhos/1466517-IAL/2020	-
B/Sao_Jose_dos_Campos/1514648/2020	-
B/Sao_Paulo/1597755-IAL/2020	-
B/Sweden/15/2015	H
B/Arizona/02/2015	H
B/Indiana/22/2015	H
B/Louisiana/16/2015	H
B/Louisiana/20/2015	H
B/Massachusetts/09/2015	H
B/Minnesota/10/2015	H
B/New_Mexico/14/2015	H
B/Rhode_Island/07/2015	H
B/Wyoming/20/2015	H
B/Wyoming/24/2015	H
B/Finland/530/2015	H
B/Ireland/26325/2015	H
B/Delaware/02/2015	H
B/Texas/28/2015	H
B/New_Jersey/03/2015	H
B/Wisconsin/24/2015	H
B/Indiana/06/2015	H
B/Utah/15/2015	H
B/North_Dakota/08/2015	H
B/North_Dakota/07/2015	H
B/Florida/13/2015	H
B/Sao_Paulo/3-26297/2015	H
B/Nevada/16/2015	H
B/PaisVasco/1293/2015	H
B/PaisVasco/1305/2015	H
B/SAKAI/3/2015	H
B/KANAGAWA/10/2015	H
B/KANAGAWA/12/2015	H
B/KANAGAWA/14/2015	H
B/Norway/2102/2015	H
B/Norway/2179/2015	H
B/Denmark/03/2015	H
B/Moscow/113/2015	H
B/WAKAYAMA/70/2015	H
B/WAKAYAMA/71/2015	H
B/FUKUSHIMA/30/2015	H
B/Indiana/25/2015	H
B/Hawaii/13/2015	H
B/Hawaii/14/2015	H
B/Hawaii/15/2015	H
B/Hawaii/16/2015	H
B/Hawaii/17/2015	H
B/Norway/2288/2015	H
B/Norway/2354/2015	H
B/Hong_Kong/1183/2015	H
B/Hong_Kong/1337/2015	H
B/South_Africa/R1588/2015	H
B/Florida/50/2015	H
B/Minnesota/18/2015	H
B/Hawaii/11/2015	H
B/Hawaii/12/2015	H
B/Florida/52/2015	H
B/Minnesota/20/2015	H
B/Nevada/22/2015	H
B/California/87/2015	H
B/Arizona/06/2015	H
B/Nevada/19/2015	H
B/Idaho/17/2015	H
B/Alaska/19/2015	H
B/Idaho/18/2015	H
B/Nevada/18/2015	H
B/Utah/28/2015	H
B/Nevada/15/2015	H
B/Nevada/17/2015	H
B/Utah/33/2015	H
B/Utah/34/2015	H
B/Wisconsin/49/2015	H
B/Indiana/27/2015	H
B/Wyoming/25/2015	H
B/Florida/58/2015	H
B/Connecticut/50/2015	H
B/Missouri/11/2015	H
B/Alaska/40/2015	H
B/California/81/2015	H
B/Florida/39/2015	H
B/Florida/55/2015	H
B/Hong_Kong/1198/2015	H
B/Hong_Kong/1372/2015	H
B/Idaho/19/2015	H
B/Idaho/21/2015	H
B/Idaho/22/2015	H
B/Idaho/25/2015	H
B/Maryland/17/2015	H
B/Nevada/23/2015	H
B/Nevada/27/2015	H
B/New_Mexico/19/2015	H
B/North_Dakota/30/2015	H
B/Santiago/34852/2015	H
B/Texas/94/2015	H
B/Utah/27/2015	H
B/Washington/63/2015	H
B/Bankgok/22/2015	H
B/Brisbane/136/2015	H
B/Brisbane/46/2015	H
B/Brisbane/55/2015	H
B/Brisbane/69/2015	H
B/Brisbane/73/2015	H
B/Canberra/30/2015	H
B/Christchurch/503/2015	H
B/Darwin/11/2015	H
B/Darwin/14/2015	H
B/Darwin/17/2015	H
B/Darwin/9/2015	H
B/New_Caledonia/27/2015	H
B/Newcastle/1005/2015	H
B/Newcastle/7/2015	H
B/Perth/24/2015	H
B/Perth/25/2015	H
B/South_Australia/1015/2015	H
B/South_Australia/49/2015	H
B/Sydney/11/2015	H
B/Tasmania/2/2015	H
B/Tasmania/5/2015	H
B/Victoria/525/2015	H
B/Victoria/557/2015	H
B/Wellington/3/2015	H
B/South_Australia/48/2015	H
B/Hawaii/09/2015	H
B/Hawaii/20/2015	H
B/Hawaii/22/2015	H
B/Nevada/13/2015	H
B/New_Mexico/20/2015	H
B/North_Dakota/31/2015	H
B/Rhode_Island/08/2015	H
B/Utah/41/2015	H
B/Wisconsin/45/2015	H
B/WAKAYAMA-C/56/2015	H
B/KANAGAWA/18/2015	H
B/TOKYO/50175/2015	H
B/KAWASAKI/18/2015	H
B/YOKOHAMA/27/2015	H
B/Taiwan/113/2015	H
B/Taiwan/197/2015	H
B/TOKYO/50143/2015	H
B/NAGASAKI/68/2015	H
B/FUKUSHIMA/34/2015	H
B/Illinois/17/2015	H
B/Missouri/10/2015	H
B/Nebraska/11/2015	H
B/Utah/37/2015	H
B/French_Guiana/8123/2015	H
B/Massachusetts/15/2015	H
B/New_Mexico/21/2015	H
B/Delaware/10/2015	H
B/North_Dakota/32/2015	H
B/New_York/19/2015	H
B/Hawaii/10/2015	H
B/California/101/2015	H
B/Louisiana/28/2015	H
B/Nevada/21/2015	H
B/Kentucky/17/2015	H
B/Colombia/4924/2015	H
B/California/58/2015	H
B/Alaska/21/2015	H
B/Idaho/20/2015	H
B/Florida/54/2015	H
B/Nevada/14/2015	H
B/Brazil/6297/2015	H
B/Mexico/1434/2015	H
B/Mexico/1522/2015	H
B/New_Zealand/427/2015	H
B/New_Zealand/537/2015	H
B/Paraguay/1131/2015	H
B/Paraguay/5133/2015	H
B/Brisbane/185/2015	H
B/Darwin/22/2015	H
B/Townsville/7/2015	H
B/Victoria/847/2015	H
B/Victoria/861/2015	H
B/Wellington/14/2015	H
B/Canberra/27/2015	H
B/Canberra/29/2015	H
B/Christchurch/521/2015	H
B/Christchurch/530/2015	H
B/Victoria/524/2015	H
B/California/94/2015	H
B/Florida/33/2015	H
B/Georgia/25/2015	H
B/Louisiana/29/2015	H
B/New_Zealand/544/2015	H
B/Rhode_Island/06/2015	H
B/Hawaii/25/2015	H
B/Argentina/11461/2015	H
B/Uruguay/98/2015	H
B/Uruguay/102/2015	H
B/Hawaii/27/2015	H
B/Montana/13/2015	H
B/HAWAII/24/2014	H
B/Washington/64/2015	H
B/Wisconsin/84/2015	H
B/Denmark/08/2015	H
B/Norway/2622/2015	H
B/California/103/2015	H
B/Montana/16/2015	H
B/Kentucky/24/2015	H
B/Montana/18/2015	H
B/Nevada/28/2015	H
B/Hawaii/29/2015	H
B/Lisboa/152/2015	H
B/Lisboa/153/2015	H
B/Sao_Paulo/68737/2015	H
B/Sao_Paulo/70230/2015	H
B/Auckland/3/2015	H
B/Brisbane/1036/2015	H
B/Brisbane/186/2015	H
B/Christchurch/534/2015	H
B/Christchurch/558/2015	H
B/Christchurch/560/2015	H
B/Darwin/65/2015	H
B/Darwin/70/2015	H
B/Dunedin/1/2015	H
B/Newcastle/1012/2015	H
B/Newcastle/28/2015	H
B/Perth/201/2015	H
B/South_Auckland/16/2015	H
B/South_Australia/1036/2015	H
B/South_Australia/118/2015	H
B/Sydney/1071/2015	H
B/Sydney/137/2015	H
B/Tasmania/30/2015	H
B/Victoria/1009/2015	H
B/Victoria/700/2015	H
B/Victoria/843/2015	H
B/Victoria/849/2015	H
B/Victoria/898/2015	H
B/Wellington/36/2015	H
B/Wellington/38/2015	H
B/Norway/2683/2015	H
B/Norway/2684/2015	H
B/Norway/2695/2015	H
B/Norway/2696/2015	H
B/Norway/2698/2015	H
B/Norway/2720/2015	H
B/Hong_Kong/1835/2015	H
B/GIFU/3/2015	H
B/Belgium/G0748/2015	H
B/Netherlands/2914/15	H
B/CastillaLaMancha/1784/2015	H
B/PaisVasco/1726/2015	H
B/Catalonia/NSVH52054/2015	H
B/Bretagne/2322/2015	H
B/Champagne_Ardenne/2335/2015	H
B/England/345/2015	H
B/Florida/78/2015	H
B/Florida/79/2015	H
B/Kentucky/25/2015	H
B/Kentucky/26/2015	H
B/Catalonia/NSVH29029/2015	H
B/Santiago/69223/2015	H
B/Iquique/51190/2015	H
B/Santiago/51747/2015	H
B/Antofagasta/68440/2015	H
B/Antofagasta/68443/2015	H
B/Antofagasta/71358/2015	H
B/Alto_Hospicio/71362/2015	H
B/Concepcion/72320/2015	H
B/Iquique/72678/2015	H
B/Santiago/73026/2015	H
B/Iquique/77562/2015	H
B/Alto_Hospicio/77591/2015	H
B/Iquique/77634/2015	H
B/Iquique/77635/2015	H
B/Iquique/77637/2015	H
B/Santiago/78311/2015	H
B/England/54180234/2015	H
B/England/54380706/2015	H
B/SHIZUOKA/30/2015	H
B/WAKAYAMA-C/66/2015	H
B/WAKAYAMA-C/68/2015	H
B/WAKAYAMA-C/69/2015	H
B/WAKAYAMA-C/70/2015	H
B/SAPPORO/23/2015	H
B/CastillaLaMancha/1806/2015	H
B/CastillaLaMancha/1807/2015	H
B/Distrito_Federal/80287/2015	H
B/Hawaii/33/2015	H
B/Goias/85943/2015	H
B/Distrito_Federal/83320/2015	H
B/Sao_Paulo/78778/2015	H
B/California/104/2015	H
B/California/109/2015	H
B/Connecticut/61/2015	H
B/Florida/80/2015	H
B/Kentucky/27/2015	H
B/Kentucky/28/2015	H
B/Kentucky/29/2015	H
B/Kentucky/30/2015	H
B/Kentucky/31/2015	H
B/Maryland/27/2015	H
B/Nevada/29/2015	H
B/Asturias/1823/2015	H
B/Asturias/1824/2015	H
B/Asturias/1825/2015	H
B/Asturias/1826/2015	H
B/Asturias/1827/2015	H
B/Asturias/1828/2015	H
B/CastillaLaMancha/1817/2015	H
B/CastillaLaMancha/1818/2015	H
B/CastillaLaMancha/1820/2015	H
B/Navarra/1849/2015	H
B/PaisVasco/1842/2015	H
B/PaisVasco/1843/2015	H
B/Austria/896531/2016	H
B/Austria/896542/2016	H
B/Austria/896524/2016	H
B/Austria/896851/2016	H
B/Belgium/2015G0748/2015	H
B/Belgium/2015G0753/2015	H
B/Belgium/2015G0762/2015	H
B/Belgium/2015G0764/2015	H
B/Belgium/2015G0769/2015	H
B/Netherlands/2914/2015	H
B/Sao_Paulo/9-10819/2015	H
B/Bangladesh/11005/2015	H
B/Iowa/33/2015	H
B/New_Brunswick/RV2410/2015	H
B/Ontario/RV2438/2015	H
B/Alberta/RV2435/2015	H
B/Taiwan/341/2015	H
B/Bretagne/2368/2015	H
B/Rennes/2483/2015	H
AB/Rennes/2547/2015	H
B/Rennes/2548/2015	H
B/Nord_Pas_de_Calais/2578/2015	H
B/Sao_Paulo/89069/2015	H
B/Sao_Paulo/88965/2015	H
B/Florida/83/2015	H
B/Florida/84/2015	H
B/Washington/70/2015	H
B/Brazil/70230/2015	H
B/Pto_Montt/80125/2015	H
B/Linares/79278/2015	H
B/South_Africa/5994/2015	H
B/California/111/2015	H
B/Brazil/87066/2015	H
B/South_Dakota/02/2015	H
B/Concepcion/81218/2015	H
B/Valparaiso/81181/2015	H
B/Talca/80905/2015	H
B/Brazil/85943/2015	H
B/Brazil/83320/2015	H
B/Santiago/80460/2015	H
B/Florida/81/2015	H
B/Florida/82/2015	H
B/Norway/2726/2015	H
B/Norway/2778/2015	H
B/Norway/2931/2015	H
B/Norway/3055/2015	H
B/Norway/134/2016	H
B/Norway/140/2016	H
B/Norway/153/2016	H
B/Norway/154/2016	H
B/Norway/187/2016	H
B/Brazil/80287/2015	H
B/Kentucky/32/2015	H
B/Ireland/66819/2015	H
B/Ireland/66861/2015	H
B/Ireland/72806/2015	H
B/Ireland/1756/2016	H
B/Ireland/2146/2016	H
B/Ireland/3154/2016	H
B/Ireland/3165/2016	H
B/Ireland/1744/2016	H
B/Ireland/2473/2016	H
B/Ireland/68861/2015	H
B/Brisbane/60/2008___(15/146)	H
B/Beijing-Huairou/12305/2015	H
B/Beijing-Xicheng/12806/2015	H
B/Shanghai-Pudongxin/11845/2015	H
B/Yunnan-Mengzi/1977/2015	H
B/Shanghai-Pudongxin/11739/2015	H
B/Shanghai-Pudongxin/11802/2015	H
B/Yunnan-Mengzi/1964/2015	H
B/Yunnan-Mengzi/1871/2015	H
B/Thuringen/43/2015	H
B/Switzerland/16034436/2015	H
B/Switzerland/16034416/2015	H
B/Sachsen/37/2015	H
B/Israel/Q-578/2015	H
B/Israel/Q-567/2015	H
B/Israel/Q-540/2015	H
B/Israel/Q-503/2015	H
B/Israel/Q-501/2015	H
B/Israel/Q-476/2015	H
B/Iceland/56/2015_(18483)	H
B/Hong_Kong/62/2016	H
B/Hong_Kong/58/2016	H
B/Hong_Kong/57/2016	H
B/Estonia/97415/2016	H
B/Estonia/97395/2015	H
B/Castilla_La_Mancha/1820/2015	H
B/Castilla_La_Mancha/1809/2015	H
B/Castilla_La_Mancha/1808/2015	H
B/Castilla_La_Mancha/1807/2015	H
B/Nordrhein-Westfalen/1/2016	H
B/Thueringen/2/2016	H
B/Berlin/1/2016	H
B/Thueringen/3/2016	H
B/Thueringen/4/2016	H
B/California/01/2016	H
B/California/02/2016	H
B/California/03/2016	H
B/California/120/2015	H
B/Florida/86/2015	H
B/Idaho/27/2015	H
B/Kentucky/33/2015	H
B/Bretagne/2531/2015	H
B/Schleswig-Holstein/1/2016	H
B/Thuringen/1/2016	H
B/Bretagne/2597/2015	H
B/Lyon/14.12.R13/2015	H
B/Lyon/17.12.R76/2015	H
B/Lyon/2583/2015	H
B/Lyon/2585/2015	H
B/Lyon/2658/2015	H
B/Marseille/2589/2015	H
B/Marseille/2590/2015	H
B/Marseille/2643/2015	H
B/Marseille/2645/2015	H
B/Darwin/87/2015	H
B/Sydney/183/2015	H
B/South_Australia/156/2015	H
B/Sydney/1096/2015	H
B/South_Australia/153/2015	H
B/Darwin/90/2015	H
B/Sydney/256/2015	H
B/Brisbane/310/2015	H
B/Perth/255/2015	H
B/Chanthaburi/135/2015	H
B/Malaysia/34215/2015	H
B/Darwin/97/2015	H
B/Austria/899719/2016	H
B/Austria/899916/2016	H
B/Austria/900122/2016	H
B/Austria/900247/2016	H
B/Austria/898143/2016	H
B/Laos/F221/2015	H
B/Laos/F374/2015	H
B/TOKYO/15387/2015	H
B/Taiwan/361/2015	H
B/Taiwan/362/2015	H
B/Bangladesh/11002/2015	H
B/British_Columbia/RV2477/2015	H
B/California/116/2015	H
B/Chanthaburi/402/2015	H
B/Chanthaburi/598/2015	H
B/Montana/02/2016	H
B/New_York/01/2016	H
B/New_York/24/2015	H
B/Oregon/01/2016	H
B/Paraguay/6747/2015	H
B/Texas/97/2015	H
B/Utah/04/2016	H
B/Utah/48/2015	H
B/Washington/07/2016	H
B/Nordrhein-Westfalen/2/2016	H
B/Nordrhein-Westfalen/3/2016	H
B/Berlin/2/2016	H
B/Thueringen/5/2016	H
B/Slovenia/106/2016	H
B/Slovenia/243/2016	H
B/Slovenia/257/2016	H
B/Slovenia/336/2016	H
B/Slovenia/345/2016	H
B/SAITAMA-C/5/2015	H
B/MIE/13/2015	H
B/YOKOHAMA/28/2015	H
B/HYOGO/1046/2015	H
B/SHIZUOKA-C/1/2016	H
B/FUKUOKA/15287/2016	H
B/YOKOHAMA/1/2016	H
B/GUNMA/5/2015	H
B/GUNMA/7/2015	H
B/YAMAGUCHI/1/2016	H
B/Stockholm/2/2016	H
B/Stockholm/3/2016	H
B/Berlin/6/2016	H
B/Thueringen/8/2016	H
B/Nordrhein-Westfalen/4/2016	H
B/Hamburg/2/2016	H
B/Bayern/2/2016	H
B/Kentucky/34/2015	H
B/Colorado/02/2016	H
B/Austria/900811/2016	H
B/Austria/901006/2016	H
B/Austria/901271/2016	H
B/Austria/901503/2016	H
B/Austria/900394/2016	H
B/Austria/900726/2016	H
B/Catalonia/NSVH06987/2016	H
B/Catalonia/NSVH47871/2016	H
B/Catalonia/NSVH52742/2016	H
B/Catalonia/NSVH53264/2016	H
B/Catalonia/NSVH54239/2016	H
B/Catalonia/NSVH54325/2016	H
B/Catalonia/NSVH55040/2016	H
B/Catalonia/NSVH56386/2016	H
B/Catalonia/NSVH56441/2016	H
B/Catalonia/NSVH56617/2016	H
B/Athens.GR/1039/2016	H
B/Athens.GR/538/2016	H
B/Stockholm/9/2015	H
B/Sweden/1/2016	H
B/Linkoping/1/2016	H
B/Sweden/2/2016	H
B/Sweden/3/2016	H
B/Linkoping/2/2016	H
B/Trollhattan/1/2016	H
B/Niedersachsen/2/2016	H
B/Hessen/5/2016	H
B/Rheinland-Pfalz/3/2016	H
B/Baden-Wuerttemberg/6/2016	H
B/Thueringen/9/2016	H
B/Bayern/1/2016	H
B/Bremen/2/2016	H
B/Niedersachsen/1/2016	H
B/Schleswig-Holstein/2/2016	H
B/Hessen/1/2016	H
B/Niedersachsen/3/2016	H
B/Austria/902189/2016	H
B/Austria/902495/2016	H
B/Austria/903629/2016	H
B/Austria/903038/2016	H
B/Austria/902497/2016	H
B/Austria/902301/2016	H
B/Austria/902891/2016	H
B/Austria/903048/2016	H
B/KANAGAWA/IC2/2016	H
B/KANAGAWA/AC3/2016	H
B/Bucuresti/190947/2016	H
B/Bucuresti/190948/2016	H
B/Lisboa/1/2016	H
B/NAGANO/2009/2016	H
B/WAKAYAMA-C/2/2016	H
B/YOKOHAMA/10/2016	H
B/YOKOHAMA/13/2016	H
B/YOKOHAMA/22/2016	H
B/TOYAMA/36/2015	H
B/TOKYO/15515/2016	H
B/CHIBA/11/2015	H
B/SENDAI/1/2016	H
B/HYOGO/1058/2016	H
B/SAITAMA/1/2016	H
B/Sichuan-Jinjiang/813/2016	H
B/Sichuan-Gaoxin/17/2016	H
B/Beijing-Xicheng/146/2016	H
B/Beijing-Xicheng/313/2015	H
B/heilongJiangxi-An/1700/2015	H
B/heilongJiangxi-An/17/2016	H
B/Anhui-Langya/11133/2015	H
B/Shaanxi-Weicheng/1633/2015	H
B/Henan-Ruyang/1664/2015	H
B/Jiangsu-Haizhou/12/2016	H
B/Beijing-Huairou/12530/2015	H
B/Henan-Shancheng/126/2016	H
B/Jiangsu-Haizhou/11031/2015	H
B/Henan-Zhongyuan/1625/2015	H
B/Yunnan-Mengzi/11125/2015	H
B/Henan-Zhaoling/1617/2015	H
B/Shaanxi-Beilin/12235/2015	H
B/Yunnan-Simao/11366/2015	H
B/Brandenburg/1/2016	H
B/Th?ringen/19/2016	H
B/Th?ringen/20/2016	H
B/Berlin/4/2016	H
B/Sachsen/4/2016	H
B/Nordrhein-Westfalen/11/2016	H
BHamburg/4/2016	H
B/Th?ringen/23/2016	H
B/Sachsen/5/2016	H
B/Berlin/12/2016	H
B/Bremen/5/2016	H
B/Mecklenburg-Vorpommern/1/2016	H
B/Thueringen/19/2016	H
B/Thueringen/20/2016	H
B/Thueringen/21/2016	H
B/Thueringen/23/2016	H
B/FUKUOKA-C/3/2016	H
B/Austria/903359/2016	H
B/Austria/903527/2016	H
B/Austria/903659/2016	H
B/Austria/904393/2016	H
B/Austria/904548/2016	H
B/Austria/902922/2016	H
B/Austria/903849/2016	H
B/Coyhaique/81401/2015	H
B/Brazil/0582/2015	H
B/Brazil/0596/2015	H
B/Pennsylvania/37/2015	H
B/Washington/01/2016	H
B/Texas/03/2016	H
B/Texas/04/2016	H
B/Texas/05/2016	H
B/Panama/317629/2015	H
B/Nevada/02/2016	H
B/Virginia/01/2016	H
B/Colombia/7057/2015	H
B/Incheon/1610/2015	H
B/Incheon/1611/2015	H
B/Gyeonggi/1616/2015	H
B/Washington/11/2016	H
B/California/117/2015	H
B/Washington/78/2015	H
B/Washington/79/2015	H
B/Kentucky/39/2015	H
B/Kentucky/40/2015	H
B/Kentucky/41/2015	H
B/Kentucky/42/2015	H
B/Kentucky/43/2015	H
B/Kentucky/36/2015	H
B/Kentucky/37/2015	H
B/Florida/02/2016	H
B/Idaho/02/2016	H
B/California/05/2016	H
B/Wisconsin/05/2016	H
B/Iowa/02/2016	H
B/Hawaii/02/2016	H
B/Hawaii/03/2016	H
B/Colorado/04/2016	H
B/Colorado/05/2016	H
B/Washington/16/2016	H
B/North_Carolina/01/2016	H
B/Washington/12/2016	H
B/California/11/2016	H
B/California/13/2016	H
B/California/14/2016	H
B/California/15/2016	H
B/California/16/2016	H
B/Texas/13/2016	H
B/TOKYO/EH2/2016	H
B/KANAGAWA/IC7/2016	H
B/KANAGAWA/IC11/2016	H
B/KANAGAWA/IC12/2016	H
B/KANAGAWA/AC4/2016	H
B/Athens.GR/1450/2016	H
B/Athens.GR/1642/2016	H
B/Athens.GR/1965/2016	H
B/Athens.GR/2024/2016	H
B/Athens.GR/2254/2016	H
B/Athens.GR/2547/2016	H
B/Andalucia/95/2016	H
B/CastillaLaMancha/108/2016	H
B/CastillaLaMancha/16111/2015	H
B/Madrid/579/2016	H
B/Madrid/580/2016	H
B/Madrid/581/2016	H
B/Madrid/583/2016	H
B/Madrid/772/2016	H
B/Madrid/773/2016	H
B/PaisVasco/183/2016	H
B/Ireland/71062/2015	H
B/Israel/A-6460/2015	H
B/Israel/A-6494/2015	H
B/Israel/A-6501/2015	H
B/Odessa/72/2016	H
B/Oman/6383/2015	H
B/Turkey/TR-19/2016	H
B/Turkey/TR-30/2016	H
B/Turkey/TR-35/2016	H
B/Ukraine/6913/2015	H
B/Lisboa/3/2016	H
B/Moldova/46.03/2016	H
B/Lisboa/niSU428_15-16/2016	H
B/Singapore/GP488/2015	H
B/Singapore/GP507/2015	H
B/Singapore/GP753/2015	H
B/Singapore/GP895/2015	H
B/Singapore/KK830/2015	H
B/Singapore/KK841/2015	H
B/Singapore/KK851/2015	H
B/Singapore/KK858/2015	H
B/Singapore/EN632/2015	H
B/Singapore/GP1744/2015	H
B/Singapore/GP1771/2015	H
B/Singapore/KK875/2015	H
B/Singapore/KK888/2015	H
B/Singapore/TT1243/2015	H
B/Singapore/TT1250/2015	H
B/Singapore/GP1796/2015	H
B/Singapore/GP1823/2015	H
B/Singapore/GP1876/2015	H
B/Singapore/KK906/2015	H
B/Singapore/KK920/2015	H
B/Singapore/EN761/2015	H
B/Singapore/EN787/2015	H
B/Singapore/GP1958/2015	H
B/Singapore/KK949/2015	H
B/Singapore/GP1957/2015	H
B/Singapore/KK1000/2015	H
B/Singapore/GP2083/2015	H
B/Singapore/GP2106/2015	H
B/Singapore/GP2111/2015	H
B/Singapore/KK1033/2015	H
B/Singapore/KK1070/2015	H
B/Pays_de_Loire/036/2016	H
B/Lorraine/052/2016	H
B/Lorraine/108/2016	H
B/Bourgogne/138/2016	H
B/Nord_Pas_de_Calais/155/2016	H
B/Paris/192/2016	H
B/Austria/904300/2016	H
B/Austria/904314/2016	H
B/Austria/904383/2016	H
B/Austria/904386/2016	H
B/Austria/904549/2016	H
B/Austria/905245/2016	H
B/Caen/204/2016	H
B/CastillaLaMancha/899/2016	H
B/Madrid/SO13890/2016	H
B/Catalonia/NSVH58818/2016	H
B/Catalonia/NSVH58953/2016	H
B/Catalonia/NSVH60985/2016	H
B/Catalonia/NSVH62519/2016	H
B/Catalonia/NSVH62868/2016	H
B/Catalonia/NSVH63535/2016	H
B/Catalonia/NSVH63885/2016	H
B/Catalonia/NSVH64114/2016	H
B/Catalonia/NSVH58591/2016	H
B/Catalonia/NSVH59180/2016	H
B/Catalonia/NSVH59862/2016	H
B/Catalonia/NSVH63226/2016	H
B/Catalonia/NSVH63734/2016	H
B/Catalonia/NSVH08203/2016	H
B/Catalonia/NSVH59566/2016	H
B/Catalonia/NSVH60101/2016	H
B/Catalonia/NSVH60404/2016	H
B/Catalonia/NSVH63203/2016	H
B/Catalonia/NSVH63609/2016	H
B/Catalonia/NSVH57826/2016	H
B/Catalonia/NSVH60375/2016	H
B/Catalonia/NSVH63319/2016	H
B/Catalonia/NSVH64386/2016	H
B/Catalonia/NSVH64671/2016	H
B/Catalonia/NSVH66637/2016	H
B/Catalonia/NSVH68538/2016	H
B/Corsica/3515-09/2016	H
B/Arkansas/01/2016	H
B/Bulgaria/008/2016	H
B/New_York/04/2016	H
B/New_York/05/2016	H
B/Missouri/01/2016	H
B/California/106/2015	H
B/Florida/04/2016	H
B/Delaware/02/2016	H
B/Kentucky/02/2016	H
B/Kentucky/03/2016	H
B/Massachusetts/02/2016	H
B/Massachusetts/03/2016	H
B/Florida/08/2016	H
B/Florida/09/2016	H
B/Florida/13/2016	H
B/Arkansas/02/2016	H
B/Michigan/03/2016	H
B/Michigan/04/2016	H
B/Washington/32/2016	H
B/Oregon/05/2016	H
B/Oregon/14/2016	H
B/Bretagne/230/2016	H
B/Paris/257/2016	H
B/Austria/904900/2016	H
B/Austria/905242/2016	H
B/Austria/905909/2016	H
B/Austria/905914/2016	H
B/Austria/905801/2016	H
B/Austria/905810/2016	H
B/Austria/905821/2016	H
B/Bretagne/327/2016	H
B/Dijon/383/2016	H
B/Paris/415/2016	H
B/Haute_Normandie/467/2016	H
B/Lorraine/527/2016	H
B/Corsica/3515-02/2016	H
B/Sao_Paulo/2691/2016	H
B/Taiwan/6047/2016	H
B/Bucuresti/192227/2016	H
B/Suceava/193393/2016	H
B/Dolj/193667/2016	H
B/Sweden/4/2016	H
B/Sweden/5/2016	H
B/Sao_Paulo/654/2016	H
B/Taiwan/6071/2016	H
B/Constanta/193670/2016	H
B/Bucuresti/193367/2016	H
B/Bucuresti/193494/2016	H
B/Dambovita/193864/2016	H
B/Trollhattan/2/2016	H
B/KANAGAWA/IC30/2016	H
B/KANAGAWA/IC31/2016	H
B/Sweden/6/2016	H
B/Stockholm/5/2016	H
B/Sweden/7/2016	H
B/Sweden/8/2016	H
B/Sweden/9/2016	H
B/Sweden/10/2016	H
B/Linkoping/3/2016	H
B/Sweden/11/2016	H
B/Sweden/12/2016	H
B/Sweden/13/2016	H
B/Sweden/14/2016	H
B/Sweden/15/2016	H
B/Sweden/16/2016	H
B/Lisboa/niRL45_15-16/2016	H
B/Lisboa/niRL46_15-16/2016	H
B/Lisboa/niRL50_15-16/2016	H
B/Lisboa/niRL51_15-16/2016	H
B/Austria/907101/2016	H
B/Austria/907279/2016	H
B/Austria/907281/2016	H
B/Austria/906534/2016	H
B/Austria/906853/2016	H
B/Austria/906724/2016	H
B/Austria/902773/2016	H
B/Belgium/G0749/2015	H
B/Belgium/G0753/2015	H
B/Belgium/G0762/2015	H
B/Belgium/G0764/2015	H
B/Belgium/H0058/2015	H
B/Belgium/G0037/2016	H
B/Belgium/H0017/2016	H
B/Belgium/S0002/2016	H
B/Belgium/S0003/2016	H
B/Belgium/S0006/2016	H
B/Belgium/S0121/2016	H
B/Belgium/S0129/2016	H
B/Belgium/S0193/2016	H
B/Belgium/S0413/2016	H
B/Belgium/2015G0749/2015	H
B/Bremen/1/2016	H
B/Croatia/131/2016	H
B/Croatia/84/2016	H
B/Estonia/97326/2015	H
B/Estonia/97370/2015	H
B/Hungary/15/2016	H
B/Hungary/16/2016	H
B/Hungary/19/2016	H
B/Netherlands/2928/2015	H
B/Oman/6335/2015	H
B/Rennes/2547/2015	H
B/Switzerland/15976202/2015	H
B/Switzerland/15983215/2015	H
B/Thuringen/8/2016	H
B/Austria/908002/2016	H
B/Austria/909235/2016	H
B/Austria/908336/2016	H
B/Austria/907295/2016	H
B/Brisbane/60/2008_NIB-58_(10/260)	H
B/Brisbane/60/2008_BX-35_(14/154)	H
B/CastillaLaMancha/1251/2016	H
B/CastillaLaMancha/1252/2016	H
B/CastillaLaMancha/1275/2016	H
B/CastillaLaMancha/1276/2016	H
B/CastillaLaMancha/1427/2016	H
B/CastillaLaMancha/1437/2016	H
B/CastillaLaMancha/1438/2016	H
B/CastillaLaMancha/1529/2016	H
B/CastillaLaMancha/1535/2016	H
B/CastillaLaMancha/1562/2016	H
B/CastillaLaMancha/1597/2016	H
B/Madrid/1339/2016	H
B/Madrid/1522/2016	H
B/Madrid/383/2016	H
B/Madrid/SO13917/2016	H
B/Navarra/1078/2016	H
B/Navarra/1080/2016	H
B/Navarra/1100/2016	H
B/Navarra/1103/2016	H
B/Navarra/1162/2016	H
B/Navarra/1298/2016	H
B/Navarra/1308/2016	H
B/Navarra/1363/2016	H
B/CastillaLaMancha/1423/2016	H
B/Navarra/661/2016	H
B/Navarra/867/2016	H
B/Roma/11/2015	H
B/Bretagne/068/2016	H
B/Paris/114/2016	H
B/Champagne_Ardenne/130/2016	H
B/Paris/144/2016	H
B/Paris/175/2016	H
B/Alsace/233/2016	H
B/Centre/254/2016	H
B/Lorraine/310/2016	H
B/Bourgogne/317/2016	H
B/Nord_Pas_de_Calais/338/2016	H
B/Basse_Normandie/351/2016	H
B/Bourgogne/363/2016	H
B/Alsace/371/2016	H
B/Bretagne/399/2016	H
B/Bretagne/419/2016	H
B/Bourgogne/433/2016	H
B/Paris/671/2016	H
B/Ireland/13872/2016	H
B/Ireland/15423/2016	H
B/Ireland/15539/2016	H
B/Morocco/829/2016	H
B/Ireland/7514/2016	H
B/Basse_Normandie/571/2016	H
B/Pays_de_Loire/573/2016	H
B/Paris/620/2016	H
B/Alsace/655/2016	H
B/Haute_Normandie/664/2016	H
B/Centre/678/2016	H
B/Bourgogne/690/2016	H
B/Basse_Normandie/740/2016	H
B/Alsace/775/2016	H
B/Paris/780/2016	H
B/Paris/809/2016	H
B/Bourgogne/820/2016	H
B/Paris/832/2016	H
B/Paris/878/2016	H
B/Basse_Normandie/938/2016	H
B/Picardie/1002/2016	H
B/Bretagne/1022/2016	H
B/Centre/1075/2016	H
B/Haute_Normandie/1108/2016	H
B/Picardie/1120/2016	H
B/Alsace/1128/2016	H
B/Paris/1130/2016	H
B/Paris/1133/2016	H
B/Pays_de_Loire/1135/2016	H
B/Champagne_Ardenne/1256/2016	H
B/Bretagne/1334/2016	H
B/Bretagne/1337/2016	H
B/Alsace/1344/2016	H
B/Basse_Normandie/1348/2016	H
B/Haute_Normandie/1360/2016	H
B/Haute_Normandie/658/2016	H
B/Paris/1220/2016	H
B/Bretagne/011/2016	H
B/Ireland/4178/2015	H
B/Ireland/2891/2016	H
B/KANAGAWA/AC19/2016	H
B/Bacau/194971/2016	H
B/KANAGAWA/IC17/2016	H
B/KANAGAWA/IC18/2016	H
B/Austria/907286/2016	H
B/Austria/908928/2016	H
B/Austria/910200/2016	H
B/Austria/908778/2016	H
B/Austria/908547/2016	H
B/Austria/908793/2016	H
B/KANAGAWA/ZC2/2016	H
B/KANAGAWA/ZC5/2016	H
B/KANAGAWA/IC23/2016	H
B/Bucuresti/194834/2016	H
B/Alba/195415/2016	H
B/Bucuresti/195451/2016	H
B/Austria/910370/2016	H
B/Austria/911036/2016	H
B/Austria/911167/2016	H
B/Austria/911168/2016	H
B/Austria/911170/2016	H
B/Austria/911908/2016	H
B/Corsica/4076-16/2016	H
B/Corsica/3501-04/2016	H
B/Corsica/3515-13/2016	H
B/Corsica/4076-10/2016	H
B/Corsica/4076-11/2016	H
B/Corsica/4076-12/2016	H
B/Corsica/3521-01/2016	H
B/Austria/902897/2016	H
B/Belgium/S0459/2016	H
B/Texas/06/2016	H
B/New_York/03/2016	H
B/Missouri/02/2016	H
B/Virginia/06/2016	H
B/Bangladesh/11007/2015	H
B/Hong_Kong/48/2016	H
B/Hong_Kong/49/2016	H
B/Hong_Kong/51/2016	H
B/Hong_Kong/63/2016	H
B/Trinidad/174/2016	H
B/Colombia/7056/2015	H
B/Colombia/6810/2015	H
B/Colombia/6809/2015	H
B/Colombia/6700/2015	H
B/New_Hampshire/03/2016	H
B/New_Hampshire/04/2016	H
B/Maine/03/2016	H
B/Mississippi/01/2016	H
B/Bahrain/921/2015	H
B/Bahrain/73/2016	H
B/Bahrain/99/2016	H
B/Bahrain/113/2016	H
B/Bahrain/115/2016	H
B/Bahrain/116/2016	H
B/Kentucky/38/2015	H
B/North_Carolina/02/2016	H
B/California/07/2016	H
B/California/09/2016	H
B/California/12/2016	H
B/Texas/12/2016	H
B/Florida/06/2016	H
B/Florida/10/2016	H
B/Florida/11/2016	H
B/Idaho/06/2016	H
B/Idaho/07/2016	H
B/Nevada/05/2016	H
B/Washington/18/2016	H
B/Washington/33/2016	H
B/Washington/34/2016	H
B/Washington/35/2016	H
B/Colorado/06/2016	H
B/Florida/22/2016	H
B/Florida/17/2016	H
B/Florida/18/2016	H
B/Florida/19/2016	H
B/Florida/20/2016	H
B/Florida/21/2016	H
B/Oregon/04/2016	H
B/California/24/2016	H
B/New_York/09/2016	H
B/Delaware/03/2016	H
B/Delaware/04/2016	H
B/New_Mexico/03/2016	H
B/New_Mexico/04/2016	H
B/Texas/15/2016	H
B/Texas/16/2016	H
B/Texas/20/2016	H
B/Virginia/04/2016	H
B/Virginia/05/2016	H
B/Utah/27/2016	H
B/Utah/28/2016	H
B/Utah/29/2016	H
B/Utah/30/2016	H
B/Utah/31/2016	H
B/California/25/2016	H
B/California/26/2016	H
B/California/125/2015	H
B/California/126/2015	H
B/Texas/22/2016	H
B/Texas/23/2016	H
B/Kentucky/04/2016	H
B/Kentucky/05/2016	H
B/California/30/2016	H
B/California/31/2016	H
B/Idaho/16/2016	H
B/Florida/25/2016	H
B/Florida/26/2016	H
B/Florida/28/2016	H
B/Wisconsin/09/2016	H
B/South_Dakota/02/2016	H
B/Pennsylvania/07/2016	H
B/Washington/37/2016	H
B/Nevada/08/2016	H
B/North_Dakota/03/2016	H
B/North_Dakota/04/2016	H
B/Minnesota/04/2016	H
B/New_Hampshire/05/2016	H
B/Ohio/01/2016	H
B/California/38/2016	H
B/Arkansas/04/2016	H
B/Arkansas/06/2016	H
B/Washington/41/2016	H
B/Washington/42/2016	H
B/Washington/43/2016	H
B/Washington/46/2016	H
B/North_Carolina/05/2016	H
B/North_Carolina/06/2016	H
B/Delaware/08/2016	H
B/California/46/2016	H
B/California/47/2016	H
B/California/48/2016	H
B/California/49/2016	H
B/California/50/2016	H
B/California/51/2016	H
B/California/52/2016	H
B/California/53/2016	H
B/Connecticut/05/2016	H
B/Mississippi/03/2016	H
B/Nevada/11/2016	H
B/Hawaii/04/2016	H
B/Kentucky/08/2016	H
B/Texas/34/2016	H
B/Texas/36/2016	H
B/New_Jersey/03/2016	H
B/Pennsylvania/11/2016	H
B/Virginia/11/2016	H
B/New_York/13/2016	H
B/Idaho/21/2016	H
B/Utah/41/2016	H
B/Utah/42/2016	H
B/New_Mexico/07/2016	H
B/Wisconsin/13/2016	H
B/Wisconsin/14/2016	H
B/Indiana/03/2016	H
B/Indiana/04/2016	H
B/Arizona/15/2016	H
B/Oregon/23/2016	H
B/Oregon/25/2016	H
B/Michigan/09/2016	H
B/Michigan/13/2016	H
B/Michigan/14/2016	H
B/Washington/49/2016	H
B/Washington/50/2016	H
B/Arkansas/07/2016	H
B/Arkansas/08/2016	H
B/Pennsylvania/14/2016	H
B/Pennsylvania/15/2016	H
B/New_York/18/2016	H
B/SHIZUOKA-C/17/2016	H
B/KUMAMOTO/1/2016	H
B/WAKAYAMA/5/2016	H
B/SAITAMA/23/2016	H
B/YAMAGATA/24/2016	H
B/KANAGAWA/IC32/2016	H
B/KANAGAWA/IC14/2016	H
B/KANAGAWA/IC15/2016	H
B/TOKYO/EH8/2016	H
B/TOKYO/EH17/2016	H
B/KANAGAWA/IC20/2016	H
B/KANAGAWA/IC21/2016	H
B/KANAGAWA/IC27/2016	H
B/KANAGAWA/IC29/2016	H
B/KANAGAWA/ZC12/2016	H
B/KANAGAWA/IC33/2016	H
B/KANAGAWA/IC35/2016	H
B/KANAGAWA/IC37/2016	H
B/OSAKA/7/2016	H
B/SENDAI/6/2016	H
B/ISHIKAWA/20/2016	H
B/HIROSHIMA-C/10/2016	H
B/MIYAZAKI/8/2016	H
B/KANAGAWA/6/2016	H
B/YOKOHAMA/31/2016	H
B/HYOGO/1100/2016	H
B/Brisbane/60/2008_BX-35_(15/300)	H
B/Roma/02/2016	H
B/Bosnia_&_Herzegovina/12-G/2016	H
B/Catalonia/162038880NS/2016	H
B/Catalonia/8514S/2016	H
B/Catalonia/8515S/2016	H
B/Catalonia/8693S/2016	H
B/Latvia/01-050352/2016	H
B/Latvia/01-062963/2016	H
B/Latvia/01-074325/2016	H
B/Salfeet/2S/2016	H
B/Connecticut/11/2016	H
B/Florida/30/2016	H
B/Florida/33/2016	H
B/Idaho/18/2016	H
B/Idaho/25/2016	H
B/Laos/426/2015	H
B/Maine/05/2016	H
B/Maryland/02/2016	H
B/New_Hampshire/07/2016	H
B/New_Hampshire/08/2016	H
B/New_Hampshire/09/2016	H
B/New_Mexico/02/2016	H
B/New_Mexico/13/2016	H
B/Paraguay/0753/2015	H
B/Paraguay/6708/2015	H
B/Utah/43/2016	H
B/Vermont/02/2016	H
B/Washington/38/2016	H
B/Washington/54/2016	H
B/Wisconsin/12/2016	H
B/Austria/912928/2016	H
B/Austria/912553B/2016	H
B/Austria/913289/2016	H
B/Austria/914033/2016	H
B/Aragon/1653/2016	H
B/Canarias/919/2016	H
B/CastillaLaMancha/1439/2016	H
B/CastillaLaMancha/1626/2016	H
B/CastillaLaMancha/1670/2016	H
B/CastillaLaMancha/1814/2016	H
B/CastillaLaMancha/1841/2016	H
B/CastillaLaMancha/1857/2016	H
B/Extremadura/1333/2016	H
B/Extremadura/1708/2016	H
B/Madrid/SO13939/2016	H
B/Navarra/1565/2016	H
B/Navarra/1726/2016	H
B/Navarra/1727/2016	H
B/Navarra/1763/2016	H
B/Navarra/1766/2016	H
B/Navarra/1767/2016	H
B/Navarra/1772/2016	H
B/PaisVasco/1045/2016	H
B/PaisVasco/1056/2016	H
B/PaisVasco/1496/2016	H
B/Niedersachsen/8/2016	H
B/Brandenburg/7/2016	H
B/Brandenburg/8/2016	H
B/Rheinland-Pfalz/38/2016	H
B/Hessen/7/2016	H
B/Berlin/33/2016	H
B/Mecklenburg-Vorpommern/2/2016	H
B/Berlin/27/2016	H
B/Baden-Wuerttemberg/28/2016	H
B/Bayern/37/2016	H
B/Thueringen/49/2016	H
B/Sachsen-Anhalt/20/2016	H
B/Hamburg/8/2016	H
B/Hamburg/9/2016	H
B/Niedersachsen/14/2016	H
B/Bayern/8/2016	H
B/Nordrhein-Westfalen/31/2016	H
B/Baden-Wuerttemberg/29/2016	H
B/Nordrhein-Westfalen/36/2016	H
B/Niedersachsen/17/2016	H
B/Bayern/6/2016	H
B/Bremen/6/2016	H
B/Berlin/86/2016	H
B/Baden-Wuerttemberg/46/2016	H
B/Hessen/32/2016	H
B/Baden-Wuerttemberg/136/2016	H
B/Mecklenburg-Vorpommern/3/2016	H
B/Berlin/44/2016	H
B/Brandenburg/15/2016	H
B/Niedersachsen/65/2016	H
B/Nordrhein-Westfalen/80/2016	H
B/Hessen/14/2016	H
B/Baden-Wuerttemberg/49/2016	H
B/Rheinland-Pfalz/15/2016	H
B/Hessen/33/2016	H
B/Saarland/5/2016	H
B/Saarland/2/2016	H
B/Nordrhein-Westfalen/81/2016	H
B/Sachsen/31/2016	H
B/Berlin/55/2016	H
B/Niedersachsen/40/2016	H
B/Hamburg/11/2016	H
B/Saarland/11/2016	H
B/Rheinland-Pfalz/19/2016	H
B/Niedersachsen/34/2016	H
B/Bayern/18/2016	H
B/Sachsen-Anhalt/33/2016	H
B/Berlin/62/2016	H
B/Sachsen/33/2016	H
B/Hessen/21/2016	H
B/Mecklenburg-Vorpommern/6/2016	H
B/Nordrhein-Westfalen/54/2016	H
B/Bremen/18/2016	H
B/Sachsen/57/2016	H
B/Baden-Wuerttemberg/137/2016	H
B/Baden-Wuerttemberg/97/2016	H
B/Niedersachsen/66/2016	H
B/Berlin/87/2016	H
B/Rheinland-Pfalz/39/2016	H
B/Niedersachsen/43/2016	H
B/Nordrhein-Westfalen/55/2016	H
B/Rheinland-Pfalz/26/2016	H
B/Berlin/71/2016	H
B/Nordrhein-Westfalen/64/2016	H
B/Sachsen-Anhalt/49/2016	H
B/Schleswig-Holstein/4/2016	H
B/Berlin/73/2016	H
B/Thueringen/73/2016	H
B/Baden-Wuerttemberg/112/2016	H
B/Hessen/28/2016	H
B/Bayern/30/2016	H
B/Thueringen/80/2016	H
B/Sachsen/52/2016	H
B/Baden-Wuerttemberg/115/2016	H
B/Nordrhein-Westfalen/72/2016	H
B/Nordrhein-Westfalen/82/2016	H
B/Saarland/9/2016	H
B/Bremen/15/2016	H
B/Baden-Wuerttemberg/125/2016	H
B/Sachsen-Anhalt/73/2016	H
B/Schleswig-Holstein/6/2016	H
B/Baden-Wuerttemberg/111/2016	H
B/Paris/769/2016	H
B/Dijon/864/2016	H
B/Dijon/1064/2016	H
B/Pays_de_Loire/1223/2016	H
B/Paris/1283/2016	H
B/Paris/1298/2016	H
B/Lorraine/1416/2016	H
B/Paris/1436/2016	H
B/Lorraine/1445/2016	H
B/Picardie/1549/2016	H
B/Centre/1570/2016	H
B/Alsace/1589/2016	H
B/Nord_Pas_de_Calais/1600/2016	H
B/Basse_Normandie/1606/2016	H
B/Lorraine/1608/2016	H
B/Nord_Pas_de_Calais/1610/2016	H
B/Bretagne/1613/2016	H
B/Pays_de_Loire/1615/2016	H
B/Picardie/1618/2016	H
B/Rennes/1632/2016	H
B/Bourgogne/1663/2016	H
B/Paris/1706/2016	H
B/Lorraine/1752/2016	H
B/Centre/1772/2016	H
B/Brisbane/60/2008___BX-31__(15/250)	H
B/Champagne_Ardenne/1590/2016	H
B/Berlin/9/2016	H
B/Nordrhein-Westfalen/19/2016	H
B/Mecklenburg-Vorpommern/1/16	H
B/Niedersachsen/11/2016	H
B/Brandenburg/3/2016	H
B/Berlin/13/2016	H
B/Berlin/14/2016	H
B/Niedersachsen/7/2016	H
B/Saarland/1/2016	H
B/Hamburg/7/2016	H
B/Berlin/15/2016	H
B/Berlin/19/2016	H
B/Dijon/1832/2016	H
B/Dijon/1835/2016	H
B/Dijon/1836/2016	H
B/Bourgogne/1875/2016	H
B/Centre/1882/2016	H
B/Centre/2068/2016	H
B/Paris/2280/2016	H
B/Ireland/13398/2016	H
B/Ireland/13400/2016	H
B/Ireland/13521/2016	H
B/Ireland/17441/2016	H
B/Canarias/1467/2016	H
B/Melilla/1914/2016	H
B/Navarra/1959/2016	H
B/Navarra/1960/2016	H
B/Navarra/1961/2016	H
B/Navarra/1962/2016	H
B/Navarra/1992/2016	H
B/Navarra/1993/2016	H
B/Navarra/1996/2016	H
B/Navarra/1997/2016	H
B/Navarra/1999/2016	H
B/Navarra/2004/2016	H
B/Lund/1/2016	H
B/Lund/2/2016	H
B/Stockholm/11/2016	H
B/Stockholm/12/2016	H
B/Stockholm/13/2016	H
B/Stockholm/6/2016	H
B/Stockholm/7/2016	H
B/Stockholm/8/2016	H
B/Stockholm/9/2016	H
B/Stockholm/10/2016	H
B/Karlstad/1/2016	H
B/Karlstad/2/2016	H
B/Trollhattan/3/2016	H
B/Trollhattan/4/2016	H
B/Trollhattan/5/2016	H
B/Sweden/18/2016	H
B/Trollhattan/7/2016	H
B/Trollhattan/8/2016	H
B/Stockholm/15/2016	H
B/Stockholm/16/2016	H
B/Linkoping/4/2016	H
B/Halmstad/1/2016	H
B/Sweden/20/2016	H
B/Cambodia/1287/2015	H
B/British_Columbia/RV0030/2016	H
B/British_Columbia/RV0031/2016	H
B/Virginia/07/2016	H
B/Mexico/29/2015	H
B/Mexico/55/2015	H
B/Georgia/05/2016	H
B/Texas/19/2016	H
B/California/37/2016	H
B/California/42/2016	H
B/Massachusetts/04/2016	H
B/New_York/12/2016	H
B/Washington/45/2016	H
B/Oregon/20/2016	H
B/Connecticut/04/2016	H
B/Connecticut/09/2016	H
B/Connecticut/10/2016	H
B/Hawaii/05/2016	H
B/Pennsylvania/10/2016	H
B/Connecticut/13/2016	H
B/Kentucky/10/2016	H
B/Kentucky/11/2016	H
B/South_Carolina/01/2016	H
B/South_Carolina/02/2016	H
B/Alabama/01/2016	H
B/Texas/43/2016	H
B/Texas/45/2016	H
B/Texas/47/2016	H
B/Texas/49/2016	H
B/Texas/51/2016	H
B/Wisconsin/19/2016	H
B/Hawaii/10/2016	H
B/Delaware/13/2016	H
B/Delaware/14/2016	H
B/Maine/10/2016	H
B/Texas/53/2016	H
B/Texas/56/2016	H
B/Texas/57/2016	H
B/Texas/59/2016	H
B/Indiana/08/2016	H
B/Indiana/09/2016	H
B/Utah/44/2016	H
B/Nevada/17/2016	H
B/Nevada/18/2016	H
B/Florida/41/2016	H
B/Florida/42/2016	H
B/Virginia/28/2016	H
B/Pennsylvania/19/2016	H
B/Pennsylvania/21/2016	H
B/Pennsylvania/22/2016	H
B/Colorado/17/2016	H
B/Washington/57/2016	H
B/Washington/58/2016	H
B/Minnesota/09/2016	H
B/New_Jersey/08/2016	H
B/Washington/60/2016	H
B/Nevada/19/2016	H
B/New_York/20/2016	H
B/New_York/23/2016	H
B/New_Hampshire/12/2016	H
B/Louisiana/03/2016	H
B/Michigan/17/2016	H
B/Michigan/18/2016	H
B/Texas/62/2016	H
B/Kansas/08/2016	H
B/Oregon/29/2016	H
B/Texas/66/2016	H
B/New_Mexico/26/2016	H
B/New_Mexico/27/2016	H
B/New_Jersey/09/2016	H
B/Wisconsin/24/2016	H
B/Texas/68/2016	H
B/Texas/70/2016	H
B/Iowa/04/2016	H
B/Iowa/08/2016	H
B/Iowa/09/2016	H
B/Utah/49/2016	H
B/Utah/50/2016	H
B/Florida/44/2016	H
B/Florida/45/2016	H
B/Texas/02/2013__BX-53C__(15/212)	H
B/Texas/02/2013___(15/234)	H
B/SHIGA/2/2016	H
B/HAMAMATU-C/78/2016	H
B/Firenze/03/2016	H
B/Milano/80/2016	H
B/Finland/564/2016	H
B/Finland/588/2016	H
B/Finland/623/2016	H
B/Milano/95/2016	H
B/Parma/47/2016	H
B/Baden-Wurttemberg/56/2016	H
B/Bayern/14/2016	H
B/Berlin/54/2016	H
B/Bulgaria/849/2016	H
B/Bulgaria/881/2016	H
B/Bulgaria/896/2016	H
B/Bulgaria/905/2016	H
B/Cyprus/F174/2016	H
B/Cyprus/F82/2016	H
B/Cyprus/F84/2016	H
B/Cyprus/F85/2016	H
B/Hessen/16/2016	H
B/Mecklenburg-Vorpommern/4/2016	H
B/Sachsen/26/2016	H
B/Serbia-NS/1475/2016	H
B/Serbia-NS/1499/2016	H
B/Serbia-NS/1500/2016	H
B/Serbia-NS/1515/2016	H
B/Serbia-NS/1527/2016	H
B/Serbia-NS/1540/2016	H
B/Serbia-NS/1548/2016	H
B/Serbia-NS/1568/2016	H
B/Serbia-NS/1569/2016	H
B/Thuringen/62/2016	H
B/Brisbane/46/2015___(15/298)	H
B/Norway/277/2016	H
B/Norway/303/2016	H
B/Norway/392/2016	H
B/Norway/426/2016	H
B/Norway/602/2016	H
B/Norway/1408/2016	H
B/Norway/1424/2016	H
B/Norway/1817/2016	H
B/Norway/1839/2016	H
B/Norway/2096/2016	H
B/Norway/2278/2016	H
B/Norway/2299/2016	H
B/Norway/2431/2016	H
B/Norway/2433/2016	H
B/Norway/3140/2016	H
B/KANAGAWA/2/2016	H
B/Laos/F388/2015	H
B/Laos/F447/2015	H
B/Laos/F450/2015	H
B/Laos/F712/2015	H
B/Laos/F0087/2016	H
B/Laos/F0234/2016	H
B/Laos/F0239/2016	H
B/Laos/F0324/2016	H
B/Laos/F0418/2016	H
B/Laos/F0421/2016	H
B/Laos/F0510/2016	H
B/Laos/F0619/2016	H
B/Laos/F0620/2016	H
B/Laos/F0650/2016	H
B/Laos/F0651/2016	H
B/Laos/F0693/2016	H
B/Laos/F0721/2016	H
B/IWATE/1/2016	H
B/TOCHIGI/16203/2016	H
B/AICHI/27/2015	H
B/TOKYO/15724/2016	H
B/KANAGAWA/AC23/2016	H
B/KANAGAWA/AC24/2016	H
B/KANAGAWA/AC26/2016	H
B/KANAGAWA/IC41/2016	H
B/KANAGAWA/AC30/2016	H
B/KANAGAWA/ZC15/2016	H
B/KANAGAWA/ZC16/2016	H
B/KANAGAWA/IC42/2016	H
B/KANAGAWA/AC35/2016	H
B/KANAGAWA/AC36/2016	H
B/Dijon/1845/2016	H
B/Centre/1890/2016	H
B/Lorraine/1909/2016	H
B/Centre/1926/2016	H
B/Champagne_Ardenne/1930/2016	H
B/Paris/1960/2016	H
B/Paris/1963/2016	H
B/Paris/1965/2016	H
B/Franche_Comte/2028/2016	H
B/Netherlands/621/2016	H
B/Netherlands/1230/2016	H
B/Netherlands/2305/2016	H
B/Netherlands/2522/2016	H
B/Netherlands/2523/2016	H
B/Netherlands/2534/2016	H
B/Netherlands/2536/2016	H
B/Lisboa/niRL121_15-16/2016	H
B/Lisboa/niRL127_15-16/2016	H
B/Lisboa/niRL140_15-16/2016	H
B/Saskatchewan/RV0047/2016	H
B/Saskatchewan/RV2499/2015	H
B/Alberta/RV2501/2015	H
B/Virginia/18/2016	H
B/Virginia/19/2016	H
B/Virginia/21/2016	H
B/Mexico/54/2016	H
B/Bahrain/1569/2015	H
B/Georgia/08/2016	H
B/New_Hampshire/06/2016	H
B/California/57/2016	H
B/California/59/2016	H
B/Maine/11/2016	H
B/Ohio/04/2016	H
B/Florida/37/2016	H
B/Florida/38/2016	H
B/Florida/39/2016	H
B/New_York/21/2016	H
B/New_Hampshire/11/2016	H
B/Delaware/18/2016	H
B/Kentucky/15/2016	H
B/Kentucky/16/2016	H
B/South_Carolina/06/2016	H
B/South_Carolina/07/2016	H
B/Maryland/03/2016	H
B/Maryland/04/2016	H
B/Maine/12/2016	H
B/Maine/15/2016	H
B/Michigan/20/2016	H
B/Missouri/04/2016	H
B/Indiana/13/2016	H
B/Vermont/04/2016	H
B/Vermont/05/2016	H
B/Vermont/07/2016	H
B/Vermont/08/2016	H
B/Vermont/09/2016	H
B/Minnesota/14/2016	H
B/Hawaii/13/2016	H
B/Idaho/31/2016	H
B/Idaho/32/2016	H
B/Colorado/20/2016	H
B/North_Dakota/09/2016	H
B/North_Dakota/10/2016	H
B/Washington/63/2016	H
B/Washington/64/2016	H
B/Iowa/11/2016	H
B/Iowa/12/2016	H
B/New_Hampshire/18/2016	H
B/California/64/2016	H
B/Nevada/22/2016	H
B/Nevada/23/2016	H
B/New_Mexico/28/2016	H
B/New_Mexico/29/2016	H
B/Washington/68/2016	H
B/Sweden/26/2016	H
B/Sweden/21/2016	H
B/Sweden/22/2016	H
B/Sweden/23/2016	H
B/Sweden/27/2016	H
B/Sweden/24/2016	H
B/Sweden/25/2016	H
B/Bayern/33/2016	H
B/Niedersachsen/60/2016	H
B/Sachsen/54/2016	H
B/Nordrhein-Westfalen/78/2016	H
B/Berlin/90/2016	H
B/Nordrhein-Westfalen/77/2016	H
B/Niedersachsen/63/2016	H
B/Niedersachsen/64/2016	H
B/Berlin/85/2016	H
B/Rheinland-Pfalz/37/2016	H
B/Nordrhein-Westfalen/84/2016	H
B/Sachsen/58/2016	H
B/Sachsen/59/2016	H
B/Thueringen/84/2016	H
B/Niedersachsen/69/2016	H
B/Niedersachsen/70/2016	H
B/Fiji/94/2015	H
B/New_Caledonia/118/2015	H
B/New_Caledonia/112/2015	H
B/Sydney/3/2016	H
B/Brisbane/1/2016	H
B/Brisbane/312/2015	H
B/New_Caledonia/76/2015	H
B/Laos/0406/2016	H
B/Laos/0525/2016	H
B/Bahrain/44/2016	H
B/Laos/0071/2016	H
B/Laos/0080/2016	H
B/Laos/0141/2016	H
B/Laos/0264/2016	H
B/Laos/0265/2016	H
B/Laos/0396/2016	H
B/Laos/0425/2016	H
B/Laos/0528/2016	H
B/Laos/0623/2016	H
B/Laos/0624/2016	H
B/Laos/0686/2016	H
B/Brazil/3070/2016	H
B/Brazil/2691/2016	H
B/Arkansas/03/2016	H
B/California/54/2016	H
B/Nevada/12/2016	H
B/New_Mexico/06/2016	H
B/Florida/32/2016	H
B/Texas/41/2016	H
B/Nevada/16/2016	H
B/New_Mexico/23/2016	H
B/Iowa/05/2016	H
B/Illinois/06/2016	H
B/North_Carolina/11/2016	H
B/Arkansas/09/2016	H
B/Arkansas/10/2016	H
B/Nebraska/07/2016	H
B/Nebraska/08/2016	H
B/Delaware/20/2016	H
B/Maryland/07/2016	H
B/Kansas/10/2016	H
B/Kansas/11/2016	H
B/Missouri/05/2016	H
B/Michigan/28/2016	H
B/Wisconsin/28/2016	H
B/Wisconsin/29/2016	H
B/Virginia/39/2016	H
B/Texas/73/2016	H
B/Maine/22/2016	H
B/Mississippi/07/2016	H
B/Indiana/15/2016	H
B/Florida/52/2016	H
B/Florida/50/2016	H
B/Vermont/10/2016	H
B/Vermont/11/2016	H
B/Colorado/25/2016	H
B/Colorado/27/2016	H
B/New_York/32/2016	H
B/New_York/28/2016	H
B/New_Hampshire/20/2016	H
B/New_Hampshire/21/2016	H
B/Massachusetts/11/2016	H
B/South_Dakota/03/2016	H
B/South_Dakota/06/2016	H
B/South_Dakota/10/2016	H
B/South_Dakota/08/2016	H
B/South_Dakota/12/2016	H
B/South_Dakota/13/2016	H
B/South_Dakota/15/2016	H
B/South_Dakota/17/2016	H
B/North_Carolina/17/2016	H
B/Louisiana/07/2016	H
B/Louisiana/05/2016	H
B/Washington/76/2016	H
B/Idaho/35/2016	H
B/Idaho/34/2016	H
B/Washington/77/2016	H
B/Kansas/14/2016	H
B/Kansas/15/2016	H
B/Texas/76/2016	H
B/Iowa/16/2016	H
B/Iowa/17/2016	H
B/Hawaii/17/2016	H
B/Texas/78/2016	H
B/Montana/14/2016	H
B/Illinois/08/2016	H
B/Illinois/10/2016	H
B/Illinois/12/2016	H
B/Pennsylvania/35/2016	H
B/Pennsylvania/40/2016	H
B/Pennsylvania/43/2016	H
B/Pennsylvania/41/2016	H
B/Wisconsin/34/2016	H
B/Indiana/19/2016	H
B/Indiana/17/2016	H
B/Mississippi/15/2016	H
B/Mississippi/16/2016	H
B/Iowa/19/2016	H
B/Iowa/22/2016	H
B/Bucuresti/196004/2016	H
B/Bucuresti/195675/2016	H
B/Laos/F0086/2016	H
B/FUKUSHIMA/26/2016	H
B/KANAGAWA/IC40/2016	H
B/KANAGAWA/IC44/2016	H
B/KANAGAWA/IC45/2016	H
B/TOKYO/EH21/2016	H
B/TOKYO/EH23/2016	H
B/Lisboa/niRL142_15-16/2016	H
B/Lisboa/niRL103_15-16/2016	H
B/Lisboa/niRL96_15-16/2016	H
B/Lisboa/niRL62_15-16/2016	H
B/Lisboa/niRL63_15-16/2016	H
B/Neimenggu-Yuquan/1171/2016	H
B/Hebei-Jingxiu/1137/2016	H
B/Sichuan-Shunqing/1174/2016	H
B/Shanghai-Jinshan/1223/2016	H
B/Shanghai-Jinshan/1222/2016	H
B/Henan-Zhongyuan/176/2016	H
B/Fujian-Licheng/180/2016	H
B/Jiangxi-Zhanggong/318/2016	H
B/Yunnan-Zhaoyang/1151/2016	H
B/Hebei-Jizhou/1136/2016	H
B/Heilongjiang-Saertu/1165/2016	H
B/Gansu-Ganzhou/1132/2016	H
B/Jilin-Chaoyang/1206/2016	H
B/Shanxi-Xinghualing/1208/2016	H
B/Fujian-Xiangcheng/293/2016	H
B/Guangxi-Xixiangtang/1158/2016	H
B/Henan-Ruyang/186/2016	H
B/Shaanxi-Qindou/34/2016	H
B/Guangdong-Zhongshan/1255/2016	H
B/Hunan-Yuhua/517/2016	H
B/Shanghai-Xuhui/1142/2016	H
B/Hunan-Wuling/1809/2016	H
B/Fujian-Gulou/1654/2016	H
B/Shanghai-Changning/1202/2016	H
B/Shanghai-Fengxian/1265/2016	H
B/Jiangsu-Fengxian/513/2016	H
B/Guangdong-Duanzhou/1308/2016	H
B/Hunan-Tianyuan/11311/2016	H
B/Neimenggu-Hailaer/1228/2016	H
B/Heilongjiang-Aihui/1234/2016	H
B/Sichuan-Gaoxin/1234/2016	H
B/Neimenggu-Huimin/11363/2016	H
B/Heilongjiang-Fujin/37/2016	H
B/Sichuan-Dongqu/1304/2016	H
B/Zhejiang-Nanhu/1282/2016	H
B/Jiangsu-Guangling/1589/2016	H
B/Liaoning-Lianshan/1209/2016	H
B/Hunan-Yuhua/1647/2016	H
B/Heilongjiang-Gongnong/1251/2016	H
B/Hunan-Yuhua/1425/2016	H
B/Shaanxi-Weicheng/1234/2016	H
B/Shaanxi-Qindou/38/2016	H
B/Fujian-Chengxiang/2134/2016	H
B/Guangxi-Xixiangtang/1265/2016	H
B/Liaoning-Lianshan/1129/2016	H
B/Fujian-Gulou/1391/2016	H
B/Jilin-Nanguan/1223/2016	H
B/Jilin-Chaoyang/1436/2016	H
B/Shandong-Decheng/1446/2016	H
B/Shandong-Mudan/1203/2016	H
B/Liaoning-Lianshan/1170/2016	H
B/Sichuan-Yucheng/1384/2016	H
B/Sichuan-Dongqu/1303/2016	H
B/Sichuan-Gaoxin/1232/2016	H
B/Hunan-Jishou/1814/2016	H
B/Hunan-Kaifu/1216/2016	H
B/Heilongjiang-Nangang/1239/2016	H
B/Shanghai-Yangpu/1192/2016	H
B/Jiangsu-Guangling/1464/2016	H
B/Anhui-Huashan/1426/2016	H
B/Heilongjiang-Saertu/1289/2016	H
B/Fujian-Xiangcheng/2244/2016	H
B/Fujian-Gulou/1499/2016	H
B/Fujian-Zhangping/32/2016	H
B/Fujian-Xianyou/1203/2016	H
B/Fujian-Cangshan/77/2016	H
B/Heilongjiang-Xiangyang/1405/2016	H
B/Heilongjiang-Daoli/1268/2016	H
B/Heilongjiang-Nangang/1224/2016	H
B/Heilongjiang-Daowai/1265/2016	H
B/Shanghai-Songjiang/1141/2016	H
B/Shanghai-Jiading/1236/2016	H
B/Hunan-Louxin/511/2016	H
B/Hunan-Yueyanglou/1244/2016	H
B/Hunan-Wuling/1725/2016	H
B/Shanghai-Fengxian/1283/2016	H
B/Jiangsu-Haizhou/1277/2016	H
B/Zhejiang-Nanhu/1253/2016	H
B/Zhejiang-Jiaojiang/1309/2016	H
B/Liaoning-Heping/1118/2016	H
B/Shaanxi-Qindou/173/2016	H
B/Henan-Longting/193/2016	H
B/Beijing-Xicheng/1233/2016	H
B/Henan-Yicheng/1118/2016	H
B/Yunnan-Wenshan/152/2016	H
B/Sichuan-Qingyang/1115/2016	H
B/Henan-Hualong/1140/2016	H
B/Anhui-Xiangshan/134/2016	H
B/Shaanxi-Weicheng/187/2016	H
B/Beijing-Huairou/1414/2016	H
B/Henan-Zhaoling/838/2016	H
B/Heilongjiang-Xiangyang/187/2016	H
B/Kungalv/4/2016	H
B/Alba/195948/2016	H
B/Bucuresti/194978/2016	H
B/Bucuresti/196001/2016	H
B/Bucuresti/679-C7895/2016	H
B/Bulgaria/177/2016	H
B/Bulgaria/238/2016	H
B/Bulgaria/261/2016	H
B/Bulgaria/343/2016	H
B/Bulgaria/350/2016	H
B/Bulgaria/489/2016	H
B/Bulgaria/669/2016	H
B/Bulgaria/692/2016	H
B/Bulgaria/757/2016	H
B/Bulgaria/774/2016	H
B/Bulgaria/790/2016	H
B/Bulgaria/792/2016	H
B/Bulgaria/830/2016	H
B/Bulgaria/831/2016	H
B/Bulgaria/841/2016	H
B/Egypt/1764/2016	H
B/Georgia/1017/2016	H
B/Georgia/915/2016	H
B/Georgia/933/2016	H
B/Jordan/20358/2016	H
B/Jordan/20364/2016	H
B/Jordan/30105/2016	H
B/Jordan/4203/2016	H
B/Jordan/4338/2016	H
B/Jordan/4380/2016	H
B/Jordan/4441/2016	H
B/Montenegro/141/2016	H
B/Montenegro/149/2016	H
B/Mures/195946/2016	H
B/Mures/196205/2016	H
B/Oman/1830/2016	H
B/Oman/1950/2016	H
B/Oman/2069/2016	H
B/Oman/7822/2015	H
B/Hawaii/18/2016	H
B/Illinois/11/2016	H
B/Indiana/21/2016	H
B/Indiana/22/2016	H
B/Kentucky/17/2016	H
B/Laos/392/2015	H
B/Laos/623/2015	H
B/Laos/624/2015	H
B/Laos/713/2015	H
B/Missouri/08/2016	H
B/Nevada/25/2016	H
B/New_Mexico/32/2016	H
B/Pennsylvania/37/2016	H
B/Texas/82/2016	H
B/Wisconsin/32/2016	H
B/Wisconsin/38/2016	H
B/Bretagne/2036/2016	H
B/Pays_de_Loire/2042/2016	H
B/Pays_de_Loire/2046/2016	H
B/Bretagne/2063/2016	H
B/Centre/2093/2016	H
B/Basse_Normandie/2096/2016	H
B/Haute_Normandie/2098/2016	H
B/Alsace/2121/2016	H
B/Franche_Comte/2192/2016	H
B/Dijon/2216/2016	H
B/Paris/2286/2016	H
B/Caen/2312/2016	H
B/Netherlands/881/2016	H
B/Netherlands/1219/2016	H
B/Netherlands/1229/2016	H
B/Netherlands/1514/2016	H
B/Netherlands/1527/2016	H
B/Netherlands/1545/2016	H
B/Netherlands/1835/2016	H
B/Netherlands/1840/2016	H
B/Netherlands/2298/2016	H
B/Netherlands/2302/2016	H
B/Netherlands/2307/2016	H
B/Netherlands/2308/2016	H
B/Netherlands/2327/2016	H
B/Netherlands/2865/2016	H
B/Netherlands/2867/2016	H
B/Netherlands/2874/2016	H
B/Netherlands/2996/2016	H
B/Netherlands/2997/2016	H
B/Netherlands/2999/2016	H
B/Netherlands/3001/2016	H
B/Netherlands/1544/2016	H
B/Finland/592/2016	H
B/Finland/645/2016	H
B/Darwin/83/2015	H
B/Alsace/942/2016	H
B/Champagne_Ardenne/1899/2016	H
B/Dijon/1987/2016	H
B/Paris/2077/2016	H
B/Haute_Normandie/2190/2016	H
B/Franche_Comte/2205/2016	H
B/Champagne_Ardenne/2206/2016	H
B/Dijon/2224/2016	H
B/Alsace/2227/2016	H
B/Franche_Comte/2233/2016	H
B/Paris/2258/2016	H
B/Centre/2260/2016	H
B/Paris/2303/2016	H
B/Pays_de_Loire/2307/2016	H
B/Lorraine/2330/2016	H
B/Bretagne/2334/2016	H
B/Dijon/2343/2016	H
B/Paris/2351/2016	H
B/Paris/2361/2016	H
B/Paris/2379/2016	H
B/Bahrain/112/2016	H
B/Connecticut/07/2016	H
B/Indiana/23/2016	H
B/Louisiana/09/2016	H
B/Louisiana/11/2016	H
B/Rhode_Island/01/2016	H
B/Wisconsin/40/2016	H
B/Wisconsin/43/2016	H
B/Banska_Bystrica/306/2016	H
B/Banska_Bystrica/336/2016	H
B/Bratislava/226/2016	H
B/Czech_Republic/111/2016	H
B/Czech_Republic/115/2016	H
B/Czech_Republic/116/2016	H
B/Czech_Republic/117/2016	H
B/Czech_Republic/118/2016	H
B/Czech_Republic/119/2016	H
B/Czech_Republic/120/2016	H
B/Czech_Republic/121/2016	H
B/Egypt/105/2016	H
B/Egypt/98/2016	H
B/Firenze/2/2016	H
B/Friuli-Venezia_Giulia/22/2016	H
B/Georgia/1089/2016	H
B/Georgia/1095/2016	H
B/Kaliningrad/83/2016	H
B/Kosice/150/2016	H
B/Levice/134/2016	H
B/Milano/145/2016	H
B/Nitra/125/2016	H
B/Novosibirsk/50/2016	H
B/Padova/2/2016	H
B/Palermo/4/2016	H
B/Palermo/6/2016	H
B/Parma/114/2016	H
B/Perugia/84/2016	H
B/Piestany/296/2016	H
B/Roma/6/2016	H
B/St.-Petersburg/171/2016	H
B/St.-Petersburg/69/2016	H
B/St.-Petersburg/71/2016	H
B/St.-Petersburg/89/2016	H
B/Topolcany/240/2016	H
B/Trencin/266/2016	H
B/Trnava/192/2016	H
B/KYOTO-C/4/2015	H
B/KOCHI/104/2016	H
B/OSAKA-C/1/2016	H
[truncated: 21,618 more rows]

## Sheet: Yamagata
Strain name	HA1 site 122
B/Austria/842669/2015	-
B/Austria/848207/2015	-
B/Goias/44020/2015	-
B/Goias/44018/2015	-
B/Goias/49693/2015	-
B/Goias/49731/2015	-
B/Distrito_Federal/53896/2015	-
B/Sao_Paulo/13-6947/2015	-
B/Sao_Paulo/9-3869/2015	-
B/Sao_Paulo/11-24926/2015	-
B/Sao_Paulo/3-36240/2015	-
A/Sao_Paulo/9-10294/2015	-
B/Mato_Grosso_do_Sul/70737/2015	-
B/Sao_Paulo/9-10441/2015	-
B/Mato_Grosso_do_Sul/85942/2015	-
B/Sao_Paulo/3-38055/2015	-
B/Mato_Grosso_do_Sul/373518/2016	-
B/Mato_Grosso/436481/2017	-
B/Rondonia/448892/2017	-
B/Sao_Paulo/539035/2017	-
B/Goias/373676/2017	-
B/Sao_Paulo/610459/2017	-
B/Catalonia/NSVH100752597/2018	-
B/Swansea/3577/2018	-
B/Mato_Grosso_do_Sul/511637/2018	-
B/Caldicot/0012/2018	-
B/Paraiba/149850-IEC/2017	-
B/Distrito_Federal/12966378/2018	-
B/Murmansk/312/2018	-
B/Norway/3273/2018	-
B/Spain/7074/2018	H
B/Colombia/5455/2015	K
B/Michigan/44/2015	K
B/Utah/42/2015	K
B/Utah/44/2015	K
B/Utah/43/2015	K
B/Utah/45/2015	K
B/Utah/46/2015	K
B/Utah/47/2015	K
B/Guangxi-Jinchengjiang/11135/2015	K
B/Utah/01/2016	K
B/Utah/06/2016	K
B/Guangxi-Xixiangtang/19/2016	K
B/Guangxi-Longan/11026/2015	K
B/Michigan/01/2016	K
B/Utah/07/2016	K
B/Utah/09/2016	K
B/Idaho/03/2016	K
B/Singapore/GP1995/2015	K
B/Utah/19/2016	K
B/Utah/20/2016	K
B/Utah/24/2016	K
B/Utah/25/2016	K
B/Idaho/05/2016	K
B/Idaho/08/2016	K
B/Idaho/13/2016	K
B/Pennsylvania/04/2016	K
B/Kansas/03/2016	K
B/Colombia/6346/2015	K
B/Utah/10/2016	K
B/Utah/16/2016	K
B/Idaho/09/2016	K
B/Utah/33/2016	K
B/Utah/34/2016	K
B/Utah/36/2016	K
B/Utah/37/2016	K
B/Idaho/17/2016	K
B/Utah/40/2016	K
B/Utah/14/2016	K
B/Utah/23/2016	K
B/Utah/52/2015	K
B/Utah/55/2015	K
B/Washington/51/2016	K
B/Arizona/18/2016	K
B/Virginia/32/2016	K
B/Utah/15/2016	K
B/Utah/49/2015	K
B/Utah/51/2016	K
B/Wyoming/11/2016	K
B/Idaho/36/2016	K
B/Guangxi-Longan/134/2016	K
B/California/72/2016	K
B/Utah/59/2016	K
B/Guangxi-Bamayaozuzizhi/727/2016	K
B/Oregon/27/2016	K
B/Idaho/39/2016	K
B/AOMORI/20/2016	K
B/Lyon/1375/2016	K
B/Hunan-Yueyanglou/1818/2016	K
B/Washington/26/2017	K
B/Washington/27/2017	K
B/Hong_Kong/264/2017	K
B/Sukhothai/18/2017	K
B/Sydney/26/2017	K
B/Niigata/15F423/2016	K
B/California/49/2017	K
B/Texas/83/2017	K
B/Norway/3370/2017	K
B/Norway/3482/2017	K
B/Norway/3550/2017	K
B/Wisconsin/77/2017	K
B/Oregon/14/2017	K
B/California/71/2017	K
B/California/70/2017	K
B/California/72/2017	K
B/Philippines/0992/2017	K
B/CataloniaNSVH100162167/2015	K
B/Norway/3619/2017	K
B/England/136/2017	K
B/KANAGAWA/IC1716/2018	K
B/MIE/20/2017	K
B/Hong_Kong/1102/2017	K
B/Northern_Ireland/17035417/2018	K
B/Netherlands/10001/2018	K
B/Netherlands/10016/2018	K
B/SWITZERLAND/23085203/2018	K
B/California/91/2017	K
B/Serbia/94/2018	K
B/AICHI/62/2017	K
B/MIE/17/2017	K
B/KOBE/347/2017	K
B/Ireland/02514/2018	K
B/England/61/2018	K
B/Norway/3620/2017	K
B/Navarra/2685/2017	K
B/Philippines/9/2017	K
B/Philippines/10/2017	K
B/Philippines/11/2017	K
B/Hong_Kong/1107/2017	K
B/Hong_Kong/1147/2017	K
B/Vermont/02/2018	K
B/Vermont/01/2018	K
B/Netherlands/10096/2018	K
B/PaisVasco/745/2018	K
B/Berlin/16/2018	K
B/New_Hampshire/03/2018	K
B/Vermont/03/2018	K
B/Vermont/06/2018	K
B/Iowa/06/2018	K
B/California/12/2018	K
B/HIROSHIMA-C/1/2017	K
B/Netherlands/10001/18	K
B/West_Virginia/14/2018	K
B/Ireland/12264/2018	K
B/Colorado/10/2018	K
B/Saskatchewan/RV2683/2018	K
B/Parma/20/2017	K
B/Switzerland/2696/2017	K
B/Seoul/823/2017	K
B/Jeju/840/2017	K
B/West_Virginia/18/2018	K
B/WAKAYAMA/17/2018	K
B/Sweden/59/2018	K
B/Barbados/666/2018	K
B/Serbia/2951/2018	K
B/CHIBA-C/11/2018	K
B/YOKOSUKA/3/2018	K
B/Ireland/03172/2018	K
B/Asaka/7/2018	K
B/Hong_Kong/1038/2018	K
B/KAWASAKI/60/2018	K
B/Taiwan/79343/2018	K
B/Taiwan/80645/2018	K
B/New_Jersey/15/2018	K
B/TOYAMA/4/2018	K
B/SAGAMIHARA/16/2018	K
B/GIFU/39/2018	K
B/Austria/1043724/2018	K
B/AOMORI/49/2018	K
B/KUMAMOTO-C/4/2018	K
B/Philippines/0268/2018	K
B/Philippines/0103/2018	K
B/Lisboa/niCHLC16_17-18/2018	K
B/Serbia/2102/2018	K
B/Serbia/1179/2018	K
B/Gyeonggi/1029/2018	K
B/OKAYAMA/25/2018	K
B/Gyeongbuk/1142/2018	K
B/India/2611/2018	K
B/Taiwan/79333/2018	K
B/Singapore/GP0610/2018	K
B/Liaoning-Haizhou/1153/2018	K
B/Liaoning-Huanggu/331/2017	K
B/Macao/605663/2017	K
B/Miyagi/43/2018	K
B/Singapore/GP1607/2018	K
B/Tennessee/13/2018	K
B/Washington/53/2017	K
B/Washington/59/2017	K
B/Washington/94/2018	K
B/Washington/197/2018	K
B/Washington/256/2018	K
B/Guam/7059/2018	K
B/Germany/7457/2018	K
B/Hawaii/7462/2018	K
B/Florida/6879/2018	K
B/Tokyo/UT-BB152/2018	K
B/Tokyo/UT-GR028/2018	K
B/Tokyo/UT-GR044/2018	K
B/Tokyo/UT-GR050/2018	K
B/Tokyo/UT-GR054/2018	K
B/Tokyo/UT-HP074/2018	K
B/Tokyo/UT-NZ002/2018	K
B/Tokyo/UT-WD003/2018	K
B/Tokyo/UT-WD013/2018	K
B/Tokyo/UT-WD014/2018	K
B/Hong_Kong/801444/2017	K
B/Lisboa/123/2015	Q
B/Austria/838888/2015	Q
B/Austria/838341/2015	Q
B/Austria/839922/2015	Q
B/Madrid/650/2015	Q
B/Melilla/670/2015	Q
B/Navarra/595/2015	Q
B/Navarra/597/2015	Q
B/Navarra/599/2015	Q
B/Navarra/746/2015	Q
B/PaisVasco/564/2015	Q
B/Austria/838893/2015	Q
B/Austria/839411/2015	Q
B/Austria/839677/2015	Q
B/Austria/839681/2015	Q
B/Austria/840546/2015	Q
B/Trollhattan/3/2015	Q
B/Sweden/2/2015	Q
B/Sweden/3/2015	Q
B/Sao_Paulo/6730/2015	Q
B/Sao_Paulo/6600/2015	Q
B/Rondonia/15893/2015	Q
B/Austria/840778/2015	Q
B/Austria/841315/2015	Q
B/Austria/841304/2015	Q
B/Austria/841309/2015	Q
B/Nebraska/03/2015	Q
B/Tocantins/16260/2015	Q
B/Goias/21789/2015	Q
B/Austria/841591/2015	Q
B/Austria/843203/2015	Q
B/Austria/842674/2015	Q
B/Austria/844048/2015	Q
B/Stockholm/4/2015	Q
B/Sweden/4/2015	Q
B/Sweden/6/2015	Q
B/Sweden/7/2015	Q
B/Sweden/8/2015	Q
B/Sweden/11/2015	Q
B/Sweden/12/2015	Q
B/Sweden/13/2015	Q
B/Stockholm/5/2015	Q
B/Sweden/10/2015	Q
B/Austria/843769/2015	Q
B/Austria/845795/2015	Q
B/Austria/845800/2015	Q
B/Austria/840703/2015	Q
B/Austria/840704/2015	Q
B/Austria/840711/2015	Q
B/Austria/840953/2015	Q
B/Austria/844105/2015	Q
B/Austria/845485/2015	Q
B/Ireland/08822/2015	Q
B/Ireland/09541/2015	Q
B/Ireland/09859/2015	Q
B/Mississippi/02/2015	Q
B/Texas/12/2015	Q
B/Wyoming/05/2015	Q
B/Indiana/04/2015	Q
B/Alabama/04/2015	Q
B/North_Carolina/03/2015	Q
B/North_Carolina/04/2015	Q
B/Vermont/03/2015	Q
B/Wisconsin/07/2015	Q
B/Virginia/03/2015	Q
B/South_Carolina/01/2015	Q
B/Alabama/03/2015	Q
B/North_Carolina/02/2015	Q
B/Iowa/04/2015	Q
B/Idaho/04/2015	Q
B/Washington/10/2015	Q
B/Virginia/04/2015	Q
B/Texas/09/2015	Q
B/Texas/08/2015	Q
B/New_York/03/2015	Q
B/Tennessee/01/2015	Q
B/Alaska/04/2015	Q
B/Ohio/04/2015	Q
B/Indiana/02/2015	Q
B/Indiana/05/2015	Q
B/Utah/12/2015	Q
B/Ohio/02/2015	Q
B/Illinois/05/2015	Q
B/Ohio/03/2015	Q
B/California/03/2015	Q
B/Utah/05/2015	Q
B/Florida/09/2015	Q
B/Kentucky/04/2015	Q
B/Wisconsin/06/2015	Q
B/Florida/08/2015	Q
B/Idaho/05/2015	Q
B/Kentucky/03/2015	Q
B/Illinois/04/2015	Q
B/Minnesota/01/2015	Q
B/Montana/04/2015	Q
B/Tennessee/02/2015	Q
B/Washington/08/2015	Q
B/Maine/03/2015	Q
B/Illinois/02/2015	Q
B/Lisboa/niRL104/2015	Q
B/Lisboa/niRL127/2015	Q
B/Lisboa/niRL133/2015	Q
B/Lisboa/niRL135/2015	Q
B/Lisboa/niRL147/2015	Q
B/Lisboa/92/2015	Q
B/Lisboa/93/2015	Q
B/Austria/844544/2015	Q
B/Austria/846334/2015	Q
B/Austria/846877/2015	Q
B/Austria/846879/2015	Q
B/Austria/847326/2015	Q
B/Austria/847334/2015	Q
B/Austria/847235/2015	Q
B/Paris/883/2015	Q
B/Centre/1079/2015	Q
B/Austria/847726/2015	Q
B/Austria/848208/2015	Q
B/Austria/848456/2015	Q
B/Austria/848458/2015	Q
B/Austria/848480/2015	Q
B/YOKOHAMA/2/2015	Q
B/YOKOHAMA/5/2015	Q
B/YAMAGUCHI/3/2015	Q
B/OITA/3/2015	Q
B/OSAKA/4/2015	Q
B/SAPPORO/2/2015	Q
B/NAGANO/2130/2015	Q
B/SAPPORO/5/2015	Q
B/OSAKA/7/2015	Q
B/Sweden/14/2015	Q
B/Stockholm/6/2015	Q
B/Stockholm/7/2015	Q
B/Anhui-Jinan/184/2015	Q
B/Beijing-Chaoyang/1246/2015	Q
B/Beijing-Chaoyang/1299/2015	Q
B/Guizhou-Huichuan/1109/2015	Q
B/Hebei-Changan/1102/2015	Q
B/Hebei-Yuhua/1131/2015	Q
B/Henan-Weibin/1104/2015	Q
B/Jiangsu-Beitang/1171/2015	Q
B/Shanghai-Songjiang/1100/2015	Q
B/Tianjin-Hedong/834/2015	Q
B/Tianjin-Hexi/1100/2015	Q
B/Tocantins/29515/2015	Q
B/Sao_Paulo/24988/2015	Q
B/Distrito_Federal/32366/2015	Q
B/Goias/32283/2015	Q
B/California/06/2015	Q
B/Arkansas/09/2015	Q
B/Arkansas/10/2015	Q
B/Arkansas/11/2015	Q
B/Louisiana/02/2015	Q
B/California/08/2015	Q
B/Iowa/06/2015	Q
B/Idaho/06/2015	Q
B/California/09/2015	Q
B/Kansas/02/2015	Q
B/Texas/05/2015	Q
B/Washington/03/2015	Q
B/Wisconsin/05/2015	Q
B/Rhode_Island/02/2015	Q
B/Texas/07/2015	Q
B/Pennsylvania/01/2015	Q
B/Georgia/01/2015	Q
B/Georgia/02/2015	Q
B/Georgia/03/2015	Q
B/Pennsylvania/06/2015	Q
B/Georgia/05/2015	Q
B/Georgia/06/2015	Q
B/Nevada/03/2015	Q
B/Nevada/02/2015	Q
B/Nevada/05/2015	Q
B/Nevada/04/2015	Q
B/Ohio/01/2015	Q
B/Kentucky/02/2015	Q
B/Utah/13/2015	Q
B/Iowa/02/2015	Q
B/Oregon/01/2015	Q
B/Idaho/03/2015	Q
B/California/01/2015	Q
B/Virginia/05/2015	Q
B/Virginia/06/2015	Q
B/Texas/23/2015	Q
B/Texas/21/2015	Q
B/Texas/18/2015	Q
B/Texas/16/2015	Q
B/Texas/17/2015	Q
B/Wisconsin/10/2015	Q
B/Wisconsin/12/2015	Q
B/New_Hampshire/03/2015	Q
B/Ohio/05/2015	Q
B/Wyoming/09/2015	Q
B/Kentucky/05/2015	Q
B/Alabama/01/2015	Q
B/Montana/05/2015	Q
B/Florida/04/2015	Q
B/Ohio/06/2015	Q
B/North_Carolina/05/2015	Q
B/Ohio/07/2015	Q
B/Wyoming/06/2015	Q
B/Montana/06/2015	Q
B/Lisboa/118/2015	Q
B/Lisboa/145/2015	Q
B/Lisboa/146/2015	Q
B/Lisboa/niRL175/2015	Q
B/Lisboa/niRL177/2015	Q
B/MIE/4/2015	Q
B/HYOGO/3210/2015	Q
B/YAMAGATA/54/2015	Q
B/GUNMA/2/2015	Q
B/SAITAMA/7/2015	Q
B/Bulgaria/317/2015	Q
B/Bulgaria/351/2015	Q
B/Bulgaria/354/2015	Q
B/Bulgaria/442/2015	Q
B/Bulgaria/523/2015	Q
B/Cyprus/F72/2015	Q
B/Extremadura/728/2015	Q
B/Extremadura/732/2015	Q
B/Georgia/162/2015	Q
B/Georgia/169/2015	Q
B/Georgia/330/2015	Q
B/Georgia/446/2015	Q
B/Georgia/498/2015	Q
B/Georgia/539/2015	Q
B/Georgia/575/2015	Q
B/Jordan/10585/2015	Q
B/Jordan/20200/2015	Q
B/Jordan/20212/2015	Q
B/Jordan/20237/2015	Q
B/Jordan/20289/2015	Q
B/Jordan/30046/2015	Q
B/Jordan/30059/2015	Q
B/Macedonia/25/2015	Q
B/Netherlands/1031/2015	Q
B/Netherlands/1052/2015	Q
B/Netherlands/1494/2015	Q
B/Netherlands/1498/2015	Q
B/Netherlands/1734/2015	Q
B/Netherlands/1900/2015	Q
B/Netherlands/1911/2015	Q
B/Tocantins/37348/2015	Q
B/Mato_Grosso/33564/2015	Q
B/Sao_Paulo/3-23079/2015	Q
B/Tocantins/43043/2015	Q
B/Connecticut/04/2015	Q
B/Gorj/177092/2015	Q
B/Bucuresti/177398/2015	Q
B/Dolj/178771/2015	Q
B/Galati/179181/2015	Q
B/Bucuresti/179465/2015	Q
B/Bucuresti/179677/2015	Q
B/Iasi/179780/2015	Q
B/Alaska/08/2015	Q
B/California/07/2015	Q
B/California/10/2015	Q
B/California/12/2015	Q
B/Connecticut/30/2015	Q
B/Delaware/06/2015	Q
B/Florida/32/2015	Q
B/Indiana/20/2015	Q
B/Iowa/14/2015	Q
B/Iowa/16/2015	Q
B/Maine/16/2015	Q
B/Minnesota/11/2015	Q
B/Minnesota/12/2015	Q
B/New_Hampshire/11/2015	Q
B/New_York/18/2015	Q
B/North_Dakota/17/2015	Q
B/North_Dakota/27/2015	Q
B/Utah/23/2015	Q
B/Utah/24/2015	Q
B/Utah/25/2015	Q
B/Vermont/12/2015	Q
B/Vermont/15/2015	Q
B/Virginia/14/2015	Q
B/Washington/24/2015	Q
B/Wisconsin/32/2015	Q
B/Luxembourg/15006680/2015	Q
B/Luxembourg/15008846/2015	Q
B/Luxembourg/15008904/2015	Q
B/Luxembourg/15009734/2015	Q
B/Luxembourg/15011691/2015	Q
B/Lisboa/niRL188/2015	Q
B/CastillaLaMancha/815/2015	Q
B/Italy/FVG-08/2015	Q
B/Milano/12/2015	Q
B/Milano/25/2015	Q
B/Parma/13/2015	Q
B/Parma/4/2015	Q
B/Perugia/22/2015	Q
B/Perugia/3/2015	Q
B/Serbia/NS-1020/2015	Q
B/Serbia/NS-1095/2015	Q
B/Serbia/NS-1280/2015	Q
B/Serbia/NS-1313/2015	Q
B/Finland/513/2015	Q
B/Ireland/12144/2015	Q
B/Ireland/12201/2015	Q
B/Ireland/13370/2015	Q
B/Ireland/23564/2015	Q
B/Ireland/23842/2015	Q
B/Ireland/24461/2015	Q
B/Ireland/24487/2015	Q
B/Ireland/24839/2015	Q
B/Ireland/26327/2015	Q
B/Ireland/26646/2015	Q
B/Galati/179025/2015	Q
B/Dolj/179263/2015	Q
B/Bucuresti/178265/2015	Q
B/Texas/25/2015	Q
B/Texas/24/2015	Q
B/Texas/26/2015	Q
B/Iowa/12/2015	Q
B/Hawaii/03/2015	Q
B/California/11/2015	Q
B/South_Carolina/02/2015	Q
B/Tennessee/03/2015	Q
B/Maine/04/2015	Q
B/Virginia/07/2015	Q
B/Wisconsin/21/2015	Q
B/Wisconsin/14/2015	Q
B/Wisconsin/13/2015	Q
B/Washington/11/2015	Q
B/Washington/12/2015	Q
B/Vermont/16/2015	Q
B/Nebraska/05/2015	Q
B/Minnesota/09/2015	Q
B/New_Hampshire/08/2015	Q
B/Texas/48/2015	Q
B/Texas/49/2015	Q
B/Delaware/04/2015	Q
B/Wisconsin/17/2015	Q
B/Wisconsin/18/2015	Q
B/Wisconsin/15/2015	Q
B/Wisconsin/19/2015	Q
B/Wisconsin/16/2015	Q
B/Washington/15/2015	Q
B/Washington/14/2015	Q
B/Washington/13/2015	Q
B/Wisconsin/33/2015	Q
B/Maine/05/2015	Q
B/Maine/06/2015	Q
B/Virginia/08/2015	Q
B/Massachusetts/03/2015	Q
B/Massachusetts/04/2015	Q
B/Vermont/04/2015	Q
B/Minnesota/02/2015	Q
B/Delaware/01/2015	Q
B/Connecticut/02/2015	Q
B/New_Hampshire/05/2015	Q
B/New_Hampshire/04/2015	Q
B/Wisconsin/23/2015	Q
B/Wisconsin/22/2015	Q
B/Utah/14/2015	Q
B/India/3512/2015	Q
B/Milano/19/2015	Q
B/Milano/21/2015	Q
B/Luxembourg/15006681/2015	Q
B/SAPPORO/15/2015	Q
B/Kentucky/06/2015	Q
B/Illinois/06/2015	Q
B/Wyoming/19/2015	Q
B/Florida/48/2015	Q
B/Wisconsin/28/2015	Q
B/Ukraine/148/2015	Q
B/Texas/34/2015	Q
B/Odessa/230/2015	Q
B/Kazakhstan/381/2015	Q
B/South_Carolina/05/2015	Q
B/New_York/02/2015	Q
B/Kazakhstan/360/2015	Q
B/Baleares/1239/2015	Q
B/Baleares/1241/2015	Q
B/Baleares/1242/2015	Q
B/Extremadura/1335/2015	Q
B/Extremadura/1336/2015	Q
B/Melilla/936/2015	Q
B/Navarra/1160/2015	Q
B/Navarra/1176/2015	Q
B/Navarra/794/2015	Q
B/PaisVasco/1178/2015	Q
B/Aragon/1309/2015	Q
B/Baleares/1240/2015	Q
B/NIIGATA/573/2015	Q
B/FUKUSHIMA/24/2015	Q
B/Connecticut/56/2015	Q
B/PaisVasco/1062/2015	Q
B/PaisVasco/1063/2015	Q
B/PaisVasco/1064/2015	Q
B/PaisVasco/1065/2015	Q
B/PaisVasco/1127/2015	Q
B/PaisVasco/1150/2015	Q
B/PaisVasco/1179/2015	Q
B/Sao_Paulo/10-19744/2015	Q
B/Distrito_Federal/53894/2015	Q
B/Iowa/05/2015	Q
B/North_Dakota/22/2015	Q
B/Illinois/16/2015	Q
B/Indiana/17/2015	Q
B/Massachusetts/11/2015	Q
B/Ohio/14/2015	Q
B/Alaska/09/2015	Q
B/WAKAYAMA-C/12/2015	Q
B/YAMAGATA/53/2015	Q
B/NAGANO/2226/2015	Q
B/SAITAMA/8/2015	Q
B/Choibalsan/1805/2015	Q
B/Sainshand/1888/2015	Q
B/Ireland/24241/2015	Q
B/Ukraine/6462/2015	Q
B/Ukraine/6463/2015	Q
B/Calarasi/179521/2015	Q
B/Constanta/179082/2015	Q
B/Dnipro/347/2015	Q
B/Greece-T/440/2015	Q
B/Kharkov/266/2015	Q
B/Norway/1881/2015	Q
B/Odessa/234/2015	Q
B/Odessa/390/2015	Q
B/Odessa/393/2015	Q
B/Palencia/225/2015	Q
B/Palencia/241/2015	Q
B/Palencia/252/2015	Q
B/Salamanca/232/2015	Q
B/Teleorman/179501/2015	Q
B/Tulcea/179584/2015	Q
B/Ukraine/361/2015	Q
B/Ukraine/6330/2015	Q
B/Ukraine/6341/2015	Q
B/Ukraine/6357/2015	Q
B/Ukraine/6359/2015	Q
B/Ukraine/6361/2015	Q
B/Ukraine/6365/2015	Q
B/Ukraine/6368/2015	Q
B/Ukraine/6387/2015	Q
B/Ukraine/6391/2015	Q
B/Ukraine/6449/2015	Q
B/Ukraine/6452/2015	Q
B/Ukraine/6453/2015	Q
B/Ukraine/6458/2015	Q
B/Ukraine/6461/2015	Q
B/Ukraine/6464/2015	Q
B/Ukraine/6468/2015	Q
B/Ukraine/6469/2015	Q
B/Ukraine/6787/2015	Q
B/Ukraine/6789/2015	Q
B/Ukraine/6790/2015	Q
B/Ukraine/6791/2015	Q
B/Ukraine/6792/2015	Q
B/Zaporizza/333/2015	Q
B/Zaporizza/339/2015	Q
B/Washington/60/2015	Q
B/Pays_de_Loire/1692/2015	Q
B/Nord_Pas_de_Calais/1681/2015	Q
B/Paris/1669/2015	Q
B/Bretagne/1668/2015	Q
B/Bretagne/1659/2015	Q
B/Milano/18/2015	Q
B/Milano/27/2015	Q
B/Milano/41/2015	Q
B/Milano/46/2015	Q
B/Milano/54/2015	Q
B/Uralsk/155/2015	Q
B/Uralsk/156/2015	Q
B/Karaganda/157/2015	Q
B/Karaganda/159/2015	Q
B/Petropavlovsk/158/2015	Q
B/Denmark/04/2015	Q
B/Denmark/05/2015	Q
B/Denmark/06/2015	Q
B/Paris/1553/2015	Q
B/Lorraine/1556/2015	Q
B/Champagne_Ardenne/1563/2015	Q
B/Franche_Comte/1596/2015	Q
B/Paris/1632/2015	Q
B/YOKOHAMA/9/2015	Q
B/WAKAYAMA/64/2015	Q
B/WAKAYAMA-C/20/2015	Q
B/OSAKA/10/2015	Q
B/ISHIKAWA/67/2015	Q
B/YOKOHAMA/21/2015	Q
B/Choibalsan/1803/2015	Q
B/TOKYO/15060/2015	Q
B/AKITA/1/2015	Q
B/Antananarivo/1012/2015	Q
B/Antananarivo/1315/2015	Q
B/Antsirabe/1037/2015	Q
B/Arkhangelsk/76/2015	Q
B/Astrakhan/10/2015	Q
B/Galanta/912/2015	Q
B/Ghana/DILI-15-0256/2015	Q
B/Ghana/DILI-15-0295/2015	Q
B/Ghana/DILI-15-0311/2015	Q
B/Kharkov/263/2015	Q
B/Krasnoyarsk/6/2015	Q
B/Levice/844/2015	Q
B/Michalovce/587/2015	Q
B/Moldova/053.06/2015	Q
B/Moldova/057.06/2015	Q
B/Moldova/099.07/2015	Q
B/Moldova/105.07/2015	Q
B/Moldova/110.07/2015	Q
B/Moldova/133.08/2015	Q
B/Moldova/138.08/2015	Q
B/Moscow/110/2015	Q
B/Moscow/112/2015	Q
B/Moscow/59/2015	Q
B/Netherlands/2403/2015	Q
B/Nitra/920/2015	Q
B/Orenburg/4/2015	Q
B/Rostov-on-Don/4/2015	Q
B/Sastin-Sraze/202/2015	Q
B/Trencin/927/2015	Q
B/Trnava/1063/2015	Q
B/Tsaralalana/1283/2015	Q
B/Ukraine/108/2015	Q
B/Vladimir/108/2015	Q
B/Yaroslavl/95-T/2015	Q
B/Zaporizza/338/2015	Q
B/Stockholm/3/2015	Q
B/Ukraine/376/2015	Q
B/Ukraine/401/2015	Q
B/Utah/04/2015	Q
B/Odessa/236/2015	Q
B/Ukraine/279/2015	Q
B/Zaporizza/326/2015	Q
B/Zaporizza/327/2015	Q
B/Odessa/235/2015	Q
B/Kharkov/262/2015	Q
B/Odessa/237/2015	Q
B/Ukraine/288/2015	Q
B/Odessa/233/2015	Q
B/Zaporizza/330/2015	Q
B/Dnipropetrovsk/445/2015	Q
B/Nigeria/607/2015	Q
B/Indiana/03/2015	Q
B/New_York/09/2015	Q
B/Vermont/02/2015	Q
B/Zaporizza/331/2015	Q
B/Nigeria/556/2015	Q
B/Odessa/389/2015	Q
B/Ukraine/356/2015	Q
B/Zaporizza/332/2015	Q
B/Odessa/385/2015	Q
B/Sao_Paulo/53930/2015	Q
B/OSAKA-C/7/2015	Q
B/OSAKA/13/2015	Q
B/KOCHI/111/2015	Q
B/HYOGO/1007/2015	Q
B/HYOGO/1011/2015	Q
B/KUMAMOTO/3/2015	Q
B/KANAGAWA/5/2015	Q
B/KAWASAKI/16/2015	Q
B/SHIMANE/7/2015	Q
B/MIE/10/2015	Q
B/HOKKAIDO/2/2015	Q
B/FUKUI/19/2015	Q
B/SAPPORO/22/2015	Q
B/WAKAYAMA/72/2015	Q
B/SAITAMA/11/2015	Q
B/TOYAMA/17/2015	Q
B/HYOGO/1026/2015	Q
B/YAMAGATA/77/2015	Q
B/FUKUSHIMA/31/2015	Q
B/Taiwan/171/2015	Q
B/AICHI/23/2015	Q
B/Maryland/12/2015	Q
B/Malaysia/14MA084/2015	Q
B/Malaysia/14MA086/2015	Q
B/Malaysia/14MA106/2015	Q
B/Malaysia/14MA124/2015	Q
B/Alaska/25/2015	Q
B/Alaska/27/2015	Q
B/Alaska/28/2015	Q
B/Arkhangelsk/79/2015	Q
B/Irkutsk/01/2015	Q
B/Laos/100/2015	Q
B/Laos/110/2015	Q
B/Laos/187/2015	Q
B/Laos/94/2015	Q
B/Laos/95/2015	Q
B/Laos/99/2015	Q
B/Peru/20/2015	Q
B/Peru/21/2015	Q
B/Peru/22/2015	Q
B/Peru/25/2015	Q
B/Rostov-On-Don/02/2015	Q
B/Brazil/59/2015	Q
B/Brisbane/11/2015	Q
B/Brisbane/19/2015	Q
B/Canberra/1/2015	Q
B/South_Australia/2/2015	Q
B/South_Australia/4/2015	Q
B/South_Australia/5/2015	Q
B/Townsville/1/2015	Q
B/Victoria/500/2015	Q
B/Mato_Grosso/57643/2015	Q
B/Rondonia/58053/2015	Q
B/Sao_Paulo/3-35674/2015	Q
B/Norway/704/2015	Q
B/Norway/845/2015	Q
B/Norway/858/2015	Q
B/Norway/974/2015	Q
B/Norway/1153/2015	Q
B/Norway/1564/2015	Q
B/Norway/1859/2015	Q
B/Norway/1948/2015	Q
B/Norway/1949/2015	Q
B/Norway/1953/2015	Q
B/Norway/2174/2015	Q
B/Norway/2186/2015	Q
B/Norway/2189/2015	Q
B/Norway/2343/2015	Q
B/Norway/2444/2015	Q
B/Norway/2538/2015	Q
B/Norway/2539/2015	Q
B/Norway/2540/2015	Q
B/Norway/2545/2015	Q
B/Norway/2552/2015	Q
B/Norway/2557/2015	Q
B/Norway/2558/2015	Q
B/NARA/3/2015	Q
B/IWATE/1/2015	Q
B/Taiwan/15/2015	Q
B/Taiwan/24/2015	Q
B/Taiwan/33/2015	Q
B/Taiwan/57/2015	Q
B/Taiwan/79/2015	Q
B/Taiwan/82/2015	Q
B/Taiwan/99/2015	Q
B/Taiwan/118/2015	Q
B/Taiwan/187/2015	Q
B/Taiwan/188/2015	Q
B/Taiwan/205/2015	Q
B/Taiwan/227/2015	Q
B/Taiwan/242/2015	Q
B/Laos/I369/2015	Q
B/Laos/O305/2015	Q
B/Laos/O306/2015	Q
B/Laos/O309/2015	Q
B/Laos/O314/2015	Q
B/Laos/O315/2015	Q
B/Estonia/93275/2015	Q
B/Brest/1416/2015	Q
B/Dakar/04/2015	Q
B/Dakar/05/2015	Q
B/Dakar/06/2015	Q
B/Dakar/07/2015	Q
B/Dakar/08/2015	Q
B/Dakar/09/2015	Q
B/Estonia/92596/2015	Q
B/Estonia/92621/2015	Q
B/Estonia/93061/2015	Q
B/Estonia/93249/2015	Q
B/Estonia/93274/2015	Q
B/Hong_Kong/1323/2015	Q
B/Hong_Kong/1325/2015	Q
B/Hong_Kong/1327/2015	Q
B/Mauritius/I-388/2015	Q
B/Mauritius/I-400/2015	Q
B/Poland/1054/2015	Q
B/Poland/1062/2015	Q
B/Poland/2477/2015	Q
B/Slovenia/1069/2015	Q
B/Slovenia/1312/2015	Q
B/Slovenia/1736/2015	Q
B/Slovenia/2006/2015	Q
B/Slovenia/2035/2015	Q
B/Slovenia/2039/2015	Q
B/Slovenia/2078/2015	Q
B/Slovenia/2168/2015	Q
B/Slovenia/2210/2015	Q
B/Slovenia/765/2015	Q
B/South_Africa/R3183/2015	Q
B/South_Africa/R3192/2015	Q
B/South_Africa/R3762/2015	Q
B/Texas/93/2015	Q
B/Vladimir/111/2015	Q
B/Hawaii/18/2015	Q
B/Hawaii/19/2015	Q
B/Moscow/109/2015	Q
B/Florida/53/2015	Q
B/Utah/38/2015	Q
B/Utah/40/2015	Q
B/Wyoming/27/2015	Q
B/Florida/49/2015	Q
B/Florida/51/2015	Q
B/Florida/46/2015	Q
B/Wisconsin/81/2015	Q
B/Florida/45/2015	Q
B/Minnesota/19/2015	Q
B/Wisconsin/79/2015	Q
B/Wyoming/28/2015	Q
B/Florida/44/2015	Q
B/Florida/43/2015	Q
B/Florida/47/2015	Q
B/Maine/17/2015	Q
B/Alaska/16/2015	Q
B/Nevada/26/2015	Q
B/California/90/2015	Q
B/Alaska/18/2015	Q
B/Maryland/20/2015	Q
B/California/91/2015	Q
B/New_Mexico/23/2015	Q
B/Maryland/19/2015	Q
B/California/89/2015	Q
B/Alaska/17/2015	Q
B/Arizona/05/2015	Q
B/Wisconsin/80/2015	Q
B/Alaska/22/2015	Q
B/Alaska/20/2015	Q
B/California/57/2015	Q
B/Alaska/13/2015	Q
B/Alaska/15/2015	Q
B/Arizona/04/2015	Q
B/Utah/35/2015	Q
B/Louisiana/15/2015	Q
B/Iowa/23/2015	Q
B/Utah/29/2015	Q
B/Wisconsin/50/2015	Q
B/Alaska/10/2015	Q
B/Alaska/11/2015	Q
B/Alaska/14/2015	Q
B/Alaska/30/2015	Q
B/Alaska/31/2015	Q
B/Alaska/33/2015	Q
B/Alaska/35/2015	Q
B/Alaska/36/2015	Q
B/Alaska/41/2015	Q
B/Alaska/42/2015	Q
B/Alaska/43/2015	Q
B/Alaska/44/2015	Q
B/Barbados/6263/2015	Q
B/Brazil/3564/2015	Q
B/Brazil/4988/2015	Q
B/Delaware/08/2015	Q
B/Delaware/09/2015	Q
B/Dominica/670/2015	Q
B/Florida/35/2015	Q
B/Florida/37/2015	Q
B/Florida/38/2015	Q
B/Florida/42/2015	Q
B/Florida/57/2015	Q
B/Florida/60/2015	Q
B/Florida/61/2015	Q
B/Florida/62/2015	Q
B/Florida/63/2015	Q
B/Florida/64/2015	Q
B/Florida/65/2015	Q
B/Florida/67/2015	Q
B/Hawaii/08/2015	Q
B/Hong_Kong/1324/2015	Q
B/Hong_Kong/1326/2015	Q
B/Hong_Kong/1328/2015	Q
B/Maryland/23/2015	Q
B/Nevada/10/2015	Q
B/Nevada/11/2015	Q
B/New_Hampshire/12/2015	Q
B/North_Dakota/34/2015	Q
B/Puerto_Montt/42299/2015	Q
B/Utah/32/2015	Q
B/Vladimir/107/2015	Q
B/Washington/30/2015	Q
B/Wisconsin/44/2015	Q
B/Brisbane/100/2015	Q
B/Brisbane/118/2015	Q
B/Brisbane/132/2015	Q
B/Brisbane/33/2015	Q
B/Brisbane/50/2015	Q
B/Brisbane/54/2015	Q
B/Brisbane/70/2015	Q
B/Canberra/13/2015	Q
B/Canberra/15/2015	Q
B/Canberra/28/2015	Q
B/Canberra/4/2015	Q
B/Christchurch/2/2015	Q
B/Christchurch/502/2015	Q
B/New_Caledonia/18/2015	Q
B/New_Caledonia/25/2015	Q
B/Newcastle/1/2015	Q
B/Newcastle/1003/2015	Q
B/Newcastle/20/2015	Q
B/Nonthaburi/1/2015	Q
B/Perth/21/2015	Q
B/South_Auckland/5/2015	Q
B/South_Australia/1000/2015	Q
B/South_Australia/12/2015	Q
B/South_Australia/18/2015	Q
B/South_Australia/22/2015	Q
B/South_Australia/28/2015	Q
B/South_Australia/50/2015	Q
B/South_Australia/71/2015	Q
B/Sydney/1013/2015	Q
B/Sydney/5/2015	Q
B/Tasmania/1/2015	Q
B/Tasmania/4/2015	Q
B/Victoria/301/2015	Q
B/Townsville/6/2015	Q
B/Victoria/32/2015	Q
B/Victoria/503/2015	Q
B/Victoria/507/2015	Q
B/Victoria/519/2015	Q
B/Victoria/532/2015	Q
B/Victoria/543/2015	Q
B/Victoria/952/2015	Q
B/Wellington/1/2015	Q
B/Yekaterinburg/155/2015	Q
B/Vladikavkaz/CRIE-45/2015	Q
B/Stavropol/CRIE-57/2015	Q
B/Stavropol/CRIE-58/2015	Q
B/Petrozavodsk/CRIE-65-/2015	Q
B/Petrozavodsk/CRIE-69/2015	Q
B/Alaska/12/2015	Q
B/Alaska/46/2015	Q
B/Antofagasta/42514/2015	Q
B/California/86/2015	Q
B/California/99/2015	Q
B/Concepcion/32003/2015	Q
B/Concepcion/45743/2015	Q
B/Delaware/11/2015	Q
B/Dominica/790/2015	Q
B/Florida/41/2015	Q
B/Florida/66/2015	Q
B/Hawaii/21/2015	Q
B/Indiana/26/2015	Q
B/Iowa/27/2015	Q
B/Maryland/18/2015	Q
B/Maryland/24/2015	Q
B/Maryland/25/2015	Q
B/Massachusetts/13/2015	Q
B/Massachusetts/16/2015	Q
B/Nevada/12/2015	Q
B/New_Jersey/11/2015	Q
B/New_Mexico/22/2015	Q
B/Puerto_Montt/38332/2015	Q
B/Santiago/30205/2015	Q
B/Santiago/30206/2015	Q
B/Santiago/34853/2015	Q
B/Santiago/37246/2015	Q
B/Santiago/40993/2015	Q
B/Utah/26/2015	Q
B/Utah/31/2015	Q
B/Utah/39/2015	Q
B/Washington/29/2015	Q
B/Wisconsin/46/2015	Q
B/Wisconsin/47/2015	Q
B/Wisconsin/48/2015	Q
B/Finland/499/2015	Q
B/Finland/500/2015	Q
B/Finland/509/2015	Q
B/Finland/511/2015	Q
B/Finland/512/2015	Q
B/Minnesota/21/2015	Q
B/Michigan/37/2015	Q
B/Wyoming/26/2015	Q
B/Kentucky/23/2015	Q
B/Wisconsin/78/2015	Q
B/New_Jersey/12/2015	Q
B/Georgia/26/2015	Q
B/Maryland/16/2015	Q
B/Alaska/24/2015	Q
B/Idaho/14/2015	Q
B/Massachusetts/14/2015	Q
B/Nebraska/10/2015	Q
B/Washington/62/2015	Q
B/Iowa/29/2015	Q
B/Washington/61/2015	Q
B/New_York/17/2015	Q
B/Connecticut/46/2015	Q
B/Louisiana/27/2015	Q
B/South_Dakota/01/2015	Q
B/Indiana/21/2015	Q
B/Hawaii/07/2015	Q
B/Brazil/113/2015	Q
B/Rhode_Island/09/2015	Q
B/North_Carolina/15/2015	Q
B/Arizona/01/2015	Q
B/Delaware/07/2015	Q
B/Arizona/08/2015	Q
B/North_Dakota/33/2015	Q
B/New_Hampshire/13/2015	Q
B/North_Carolina/16/2015	Q
B/Iowa/22/2015	Q
B/Maryland/15/2015	Q
B/California/88/2015	Q
B/Laos/310/2015	Q
B/French_Guiana/6109/2015	Q
B/French_Guiana/0135/2015	Q
B/French_Guiana/1126/2015	Q
B/Brazil/3079/2015	Q
B/Laos/312/2015	Q
B/Laos/313/2015	Q
B/Laos/331/2015	Q
B/Sao_Paulo/2-16361/2015	Q
B/Sao_Paulo/60268/2015	Q
B/Acre/135657-IEC/2015	Q
B/Brazil/118/2015	Q
B/Brazil/163/2015	Q
B/Brazil/4926/2015	Q
B/Brazil/6947/2015	Q
B/Brazil/7643/2015	Q
B/Brisbane/47/2015	Q
B/Ecuador/12015/2015	Q
B/French_Guiana/7165/2015	Q
B/Guadeloupe/9121/2015	Q
B/Hawaii/23/2015	Q
B/Laos/226/2015	Q
B/Martinique/2105/2015	Q
B/Martinique/2109/2015	Q
B/Mexico/1339/2015	Q
B/Mexico/1447/2015	Q
B/Mexico/1460/2015	Q
B/New_Zealand/1050/2015	Q
B/New_Zealand/120/2015	Q
B/New_Zealand/143/2015	Q
B/New_Zealand/229/2015	Q
B/New_Zealand/269/2015	Q
B/New_Zealand/328/2015	Q
B/New_Zealand/398/2015	Q
B/New_Zealand/426/2015	Q
B/New_Zealand/439/2015	Q
B/New_Zealand/443/2015	Q
B/New_Zealand/444/2015	Q
B/New_Zealand/478/2015	Q
B/New_Zealand/515/2015	Q
B/New_Zealand/517/2015	Q
B/New_Zealand/558/2015	Q
B/New_Zealand/594/2015	Q
B/New_Zealand/597/2015	Q
B/New_Zealand/681/2015	Q
B/New_Zealand/684/2015	Q
B/New_Zealand/746/2015	Q
B/New_Zealand/79/2015	Q
B/New_Zealand/950/2015	Q
B/New_Zealand/953/2015	Q
B/New_Zealand/955/2015	Q
B/Para/134115-IEC/2015	Q
B/Para/134208-IEC/2015	Q
B/Para/135112-IEC/2015	Q
B/Paraguay/4726/2015	Q
B/Paraguay/950/2015	Q
B/Paraguay/9867/2015	Q
B/Pernambuco/135315-IEC/2015	Q
B/Puerto_Rico/01/2015	Q
B/NAGANO-C/22/2015	Q
B/TOKYO/42211/2015	Q
B/AICHI/15/2015	Q
B/HYOGO/1031/2015	Q
B/TOYAMA/35/2015	Q
B/NAGASAKI/18/2015	Q
B/NAGASAKI/48/2015	Q
B/HYOGO/1039/2015	Q
B/YAMAGATA/78/2015	Q
B/YAMAGATA/80/2015	Q
B/KAGOSHIMA/3051/2015	Q
B/KAGOSHIMA/3052/2015	Q
B/KAGOSHIMA/3053/2015	Q
B/OITA/4/2015	Q
B/YOKOHAMA/24/2015	Q
B/WAKAYAMA-C/64/2015	Q
B/SENDAI/11/2015	Q
B/KUMAMOTO-C/4/2015	Q
B/NAGANO/2267/2015	Q
B/NIIGATA-C/15/2015	Q
B/TOCHIGI/15210/2015	Q
B/CHIBA-C/44/2015	Q
B/KANAGAWA/19/2015	Q
B/SHIMANE/9/2015	Q
B/GUNMA/4/2015	Q
B/Petrozavodsk/CRIE-70/2015	Q
B/Syktyvkar/CRIE-82/2015	Q
B/Syktyvkar/CRIE-83/2015	Q
B/Kursk/CRIE-90/2015	Q
B/Moscow/CRIE-103/2015	Q
B/Samara/CRIE-105/2015	Q
B/Samara/CRIE-106/2015	Q
B/Samara/CRIE-107/2015	Q
B/Samara/CRIE-108/2015	Q
B/Volgograd/CRIE-109/2015	Q
B/Volgograd/CRIE-112/2015	Q
B/Volgograd/CRIE-114/2015	Q
B/Ufa/CRIE-124/2015	Q
B/Tula/CRIE-126/2015	Q
B/Tula/CRIE-134/2015	Q
B/Moscow/CRIE-140/2015	Q
B/Moscow/CRIE-142/2015	Q
B/Moscow/CRIE-143/2015	Q
B/Moscow/CRIE-144/2015	Q
B/Mexico/1137/2015	Q
B/Chanthaburi/315/2015	Q
B/Bangkok/42/2015	Q
B/Mexico/1274/2015	Q
B/Sapporo/02/2015	Q
B/Mexico/1135/2015	Q
B/Laos/317/2015	Q
B/Mexico/1279/2015	Q
B/Mexico/1186/2015	Q
B/Mexico/1271/2015	Q
B/Mexico/1273/2015	Q
B/OSAKA/16/2015	Q
B/KANAGAWA/9/2015	Q
B/TOCHIGI/15207/2015	Q
B/CHIBA-C/42/2015	Q
B/Antalya/1168/2015	Q
B/Guyane/1751/2015	Q
B/Istanbul/1141/2015	Q
A/Sao_Paulo/9-10294/2015	Q
B/Sao_Paulo/3-36401/2015	Q
B/Victoria/845/2015	Q
B/Victoria/530/2015	Q
B/Alaska/07/2015	Q
B/Alaska/47/2015	Q
B/Amazonas/134602-IEC/2015	Q
B/Guadeloupe/9145/2015	Q
B/Idaho/26/2015	Q
B/Iowa/26/2015	Q
B/Kentucky/20/2015	Q
B/Laos/305/2015	Q
B/Maryland/22/2015	Q
B/Massachusetts/12/2015	Q
B/Minnesota/13/2015	Q
B/New_Jersey/10/2015	Q
B/New_Mexico/18/2015	Q
B/Rio_Grande_Do_Norte/134586-IEC/2015	Q
B/Rio_Grande_Do_Norte/135061-IEC/2015	Q
B/Utah/30/2015	Q
B/Washington/32/2015	Q
B/Hungary/437/2015	Q
B/Iceland/33/2015_(15-02274)	Q
B/Iceland/42/2015_(15-03701)	Q
B/Iceland/44/2015_(15-04264)	Q
B/Iceland/47/2015_(15-04427)	Q
B/Jordan/20606/2015	Q
B/Jordan/30324/2015	Q
B/Mozambique/IR1010/2015	Q
B/Iceland/28/2015_(15-02067)	Q
B/Jordan/30356/2015	Q
B/Indonesia/Nihrdi-Bkl140/2015	Q
B/Indonesia/Nihrdi-Mlg157/2015	Q
B/Indonesia/Nihrdi-Jbi144/2015	Q
B/Indonesia/Nihrdi-Jbi136/2015	Q
B/Indonesia/Nihrdi-Lpg059/2015	Q
B/Indonesia/Nihrdi-Amb117/2015	Q
B/Indonesia/Nihrdi-Smg138/2015	Q
B/Hawaii/24/2015	Q
B/Florida/70/2015	Q
B/Florida/71/2015	Q
B/Kyrgyzstan/87/2015	Q
B/Kyrgyzstan/100/2015	Q
B/Kyrgyzstan/96/2015	Q
B/Kyrgyzstan/95/2015	Q
B/Kyrgyzstan/68/2015	Q
B/Alaska/49/2015	Q
B/Kyrgyzstan/105/2015	Q
B/Kyrgyzstan/35/2015	Q
B/Kyrgyzstan/71/2015	Q
B/Kyrgyzstan/84/2015	Q
B/Kyrgyzstan/83/2015	Q
B/Kyrgyzstan/125/2015	Q
B/Kyrgyzstan/74/2015	Q
B/Kyrgyzstan/122/2015	Q
B/Kyrgyzstan/92/2015	Q
B/Iceland/6544/2015_(15-06544)	Q
B/Jordan/20365/2015	Q
B/Jordan/30236/2015	Q
B/Jordan/30264/2015	Q
B/Mozambique/IR1062/2015	Q
B/Mozambique/IR981/2015	Q
B/Norway/1921/2015	Q
B/Zambia/04-00173/2015	Q
B/Zambia/04-00314/2015	Q
B/Pennsylvania/34/2015	Q
B/Florida/73/2015	Q
B/Alaska/48/2015	Q
B/Montana/12/2015	Q
B/Florida/72/2015	Q
B/Indonesia/Nihrd-Jbi152/2015	Q
B/Hawaii/26/2015	Q
B/Brazil/8053/2015	Q
B/Brazil/6361/2015	Q
B/Brazil/2724/2015	Q
B/Montana/14/2015	Q
B/Brazil/3930/2015	Q
B/Montana/15/2015	Q
B/Hawaii/28/2015	Q
B/Minnesota/23/2015	Q
B/Florida/74/2015	Q
B/FUKUSHIMA/33/2015	Q
B/FUKUI/21/2015	Q
B/IWATE/7/2015	Q
B/YOKOHAMA/26/2015	Q
B/KUMAMOTO/10/2015	Q
B/KAWASAKI/20/2015	Q
B/ISHIKAWA/105/2015	Q
B/ISHIKAWA/107/2015	Q
B/OKINAWA/5/2015	Q
B/Montana/17/2015	Q
B/Wisconsin/85/2015	Q
B/Kyrgyzstan/72/2015	Q
B/Iowa/30/2015	Q
B/Alaska/52/2015	Q
B/Kyrgyzstan/39/2015	Q
B/Puerto_Rico/02/2015	Q
B/Michigan/41/2015	Q
B/Hawaii/30/2015	Q
B/Serbia/1753/2015	Q
B/Serbia/2064/2015	Q
B/Serbia/2756/2015	Q
B/Navarra/1619/2015	Q
B/Kyrgyzstan/32/2015	Q
B/OKINAWA/8/2015	Q
B/Laos/SA259/2015	Q
B/KANAGAWA/23/2015	Q
B/OKINAWA/4/2015	Q
B/OSAKA-C/11/2015	Q
B/Lisboa/niRL21_15-16/2015	Q
B/Mato_Grosso_do_Sul/69146/2015	Q
B/Sao_Paulo/67676/2015	Q
B/KANAGAWA/21/2015	Q
B/Saint-Petersburg/RII45/2015	Q
B/Alberta/RV2364/2015	Q
B/Alberta/RV2365/2015	Q
B/Alberta/RV2366/2015	Q
B/Peru/9115/2015	Q
B/Florida/77/2015	Q
B/Florida/76/2015	Q
B/Florida/75/2015	Q
B/Auckland/9/2015	Q
B/Christchurch/561/2015	Q
B/Darwin/61/2015	Q
B/Dunedin/3/2015	Q
B/New_Caledonia/38/2015	Q
B/New_Caledonia/40/2015	Q
B/New_Caledonia/44/2015	Q
B/Perth/136/2015	Q
B/Perth/166/2015	Q
B/Sydney/1031/2015	Q
B/Sydney/153/2015	Q
B/Sydney/70/2015	Q
B/Tasmania/32/2015	Q
B/Victoria/691/2015	Q
B/Victoria/698/2015	Q
B/Wellington/31/2015	Q
B/Wellington/32/2015	Q
B/Wellington/33/2015	Q
B/Macau/612049/2015	Q
B/Norway/2690/2015	Q
B/Norway/2692/2015	Q
B/Hong_Kong/1866/2015	Q
B/Hong_Kong/1862/2015	Q
B/Paris/1840/2015	Q
B/Berlin/50/2015	Q
B/Delaware/12/2015	Q
B/Hawaii/31/2015	Q
B/Louisiana/32/2015	Q
B/Montana/19/2015	Q
B/Nigeria/213/2015	Q
B/Nigeria/313/2015	Q
B/Nigeria/399/2015	Q
B/Peru/1515/2015	Q
B/Peru/40/2015	Q
B/Texas/95/2015	Q
B/Santiago/12342/2015	Q
B/Santiago/21302/2015	Q
B/Valparaiso/41364/2015	Q
B/Santiago/23988/2015	Q
B/Iquique/36663/2015	Q
B/Santiago/47840/2015	Q
B/Santiago/63252/2015	Q
B/Puerto_Montt/45568/2015	Q
B/Temuco/45732/2015	Q
B/Linares/47754/2015	Q
B/Santiago/49543/2015	Q
B/Antofagasta/50214/2015	Q
B/Talca/70573/2015	Q
B/Linares/71228/2015	Q
B/Iquique/71344/2015	Q
B/Rancagua/72819/2015	Q
B/Linares/75268/2015	Q
B/England/52560639/2015	Q
B/England/54600610/2015	Q
B/England/54220123/2015	Q
B/SHIMANE/10/2015	Q
B/SHIMANE/12/2015	Q
B/SHIMANE/14/2015	Q
B/Sao_Paulo/3-37100/2015	Q
B/Sao_Paulo/73089/2015	Q
B/Sao_Paulo/3-37859/2015	Q
B/Arizona/10/2015	Q
B/Hawaii/32/2015	Q
B/Maryland/26/2015	Q
B/South_Africa/5641/2015	Q
B/South_Africa/5842/2015	Q
B/South_Africa/6083/2015	Q
B/South_Africa/6448/2015	Q
B/South_Africa/6512/2015	Q
B/Texas/96/2015	Q
B/Sao_Paulo/80259/2015	Q
B/Arizona/11/2015	Q
B/California/105/2015	Q
B/California/107/2015	Q
B/Delaware/13/2015	Q
B/Delaware/14/2015	Q
B/Egypt/4417/2015	Q
B/Guangdong-Futian/1372/2015	Q
B/Pennsylvania/36/2015	Q
B/Peru/41/2015	Q
B/Washington/65/2015	Q
B/Washington/66/2015	Q
B/Washington/69/2015	Q
B/Wisconsin/86/2015	Q
B/Halmstad/2/2015	Q
B/Mali/23_CS/2015	Q
B/Mali/38_CH/2015	Q
B/Mali/40_CI/2015	Q
B/Mali/48_CI/2015	Q
B/Mali/90_CI/2015	Q
B/Mali/91_CI/2015	Q
B/Mali/97_CI/2015	Q
B/South_Africa/5747/2015	Q
B/Wisconsin/87/2015	Q
B/Sao_Paulo/3-38139/2015	Q
B/Sao_Paulo/9-10753/2015	Q
B/Lisboa/151/2015	Q
B/Belgium/2015G0771/2015	Q
B/Belgium/2015G0775_/2015	Q
B/Egypt/3743/2015	Q
B/Egypt/4563/2015	Q
B/Egypt/4959/2015	Q
B/Iran/110767/2015_(12)	Q
B/Iran/115032/2015_(4-c)	Q
B/Minnesota/25/2015	Q
B/Bangladesh/1005/2015	Q
B/Michigan/43/2015	Q
B/Wisconsin/89/2015	Q
B/Wisconsin/88/2015	Q
B/Iowa/32/2015	Q
B/Mali/010_SIK/2015	Q
B/South_Africa/6701/2015	Q
B/Alberta/RV2384/2015	Q
B/California/108/2015	Q
B/Ontario/RV2417/2015	Q
B/Alberta/RV2388/2015	Q
B/Taiwan/351/2015	Q
B/Taiwan/349/2015	Q
B/Taiwan/350/2015	Q
B/Gorbea/75877/2015	Q
B/Arizona/12/2015	Q
B/California/110/2015	Q
B/California/113/2015	Q
B/Hawaii/35/2015	Q
B/Hawaii/34/2015	Q
B/Brazil/36401/2015	Q
B/Los_Angeles/77381/2015	Q
B/California/112/2015	Q
B/Coronel/73964/2015	Q
B/Santiago/75552/2015	Q
B/Pucon/75541/2015	Q
B/Quillota/74179/2015	Q
B/South_Africa/5799/2015	Q
B/Brazil/71888/2015	Q
B/South_Africa/5935/2015	Q
B/Norway/2782/2015	Q
B/Norway/2912/2015	Q
B/Norway/2968/2015	Q
B/Norway/3062/2015	Q
B/Norway/147/2016	Q
B/Rostov-on-Don/RII02/2015	Q
B/Saint-Petersburg/RII08FBUZ/2015	Q
B/Rostov-on-Don/RII04/2015	Q
B/Saint-Petersburg/RII01FBUZ/2015	Q
B/Moscow/RII07/2015	Q
B/Astrakhan/RII10/2015	Q
B/Saint-Petersburg/RII1362S/2015	Q
A/Archangelsk/RII76/2015	Q
B/Saint-Petersburg/RII07FBUZ/2015	Q
B/Saint-Petersburg/RII40/2015	Q
B/Bolivia/400/2015	Q
B/Bolivia/404/2015	Q
B/Bolivia/420/2015	Q
B/Cambodia/0894/2015	Q
B/Cambodia/1011/2015	Q
B/Cambodia/1072/2015	Q
B/Cambodia/1087/2015	Q
B/Cambodia/1122/2015	Q
B/Cambodia/1123/2015	Q
B/Cambodia/1141/2015	Q
B/Indiana/01/2016	Q
B/Mali/257_CI/2015	Q
B/Mali/75_CI/2015	Q
B/Oklahoma/08/2015	Q
B/Jiangsu-Wujiang/2138/2015	Q
B/Yunnan-Mengzi/1928/2015	Q
B/Yunnan-Linxiang/11121/2015	Q
B/Chongqing-Yuzhong/11448/2015	Q
B/Sichuan-Jinjiang/2276/2015	Q
B/Hunan-Jishou/11551/2015	Q
B/Hubei-Songzi/1813/2015	Q
B/Guangxi-Gangbei/1951/2015	Q
B/Yunnan-Hongta/11131/2015	Q
B/Sichuan-Gaoxin/1652/2015	Q
B/Hainan-Xiuying/1880/2015	Q
B/Tianjin-Nankai/1945/2015	Q
B/Jiangsu-Tianning/1764/2015	Q
B/Sichuan-Jiangyang/11330/2015	Q
B/Sichuan-Jinjiang/83/2015	Q
B/Guangxi-Xixiangtang/1995/2015	Q
B/Zhejiang-Nanhu/1707/2015	Q
B/Jiangsu-Jurong/1707/2015	Q
B/Switzerland/16034257/2015	Q
B/Switzerland/15976242/2015	Q
B/Norway/2760/2015	Q
B/Iceland/3/2016_(567)	Q
B/Hong_Kong/61/2016	Q
B/Hong_Kong/60/2016	Q
B/Ghana/FS-15-0612/2015	Q
B/YAMAGATA/83/2015	Q
B/YAMAGATA/84/2015	Q
B/YAMAGATA/85/2015	Q
B/KANAGAWA/24/2015	Q
B/KANAGAWA/25/2015	Q
B/TOKYO/15331/2015	Q
B/TOKYO/15332/2015	Q
B/YAMAGATA/87/2015	Q
B/Hamburg/1/2016	Q
B/California/04/2016	Q
B/California/121/2015	Q
B/Florida/01/2016	Q
B/Massachusetts/01/2016	Q
B/Pakistan/367/2015	Q
B/Christchurch/27/2015	Q
B/Tauranga/5/2015	Q
B/Wellington/44/2015	Q
B/Victoria/116/2015	Q
B/Sydney/251/2015	Q
B/Canberra/111/2015	Q
B/South_Australia/141/2015	Q
B/Chanthaburi/107/2015	Q
B/Sydney/53/2015	Q
B/South_Australia/136/2015	Q
B/Chanthaburi/132/2015	Q
B/Malaysia/39440/2015	Q
B/Utah/09/2014__(14/320)	Q
B/Vietnam/0991/2015	Q
B/Laos/F100/2015	Q
B/Laos/SA417/2015	Q
B/Taiwan/355/2015	Q
B/Taiwan/357/2015	Q
B/Taiwan/358/2015	Q
B/Taiwan/359/2015	Q
B/Taiwan/360/2015	Q
B/Taiwan/363/2015	Q
B/Taiwan/365/2015	Q
B/Taiwan/366/2015	Q
B/Arizona/01/2016	Q
B/Bangladesh/103006/2015	Q
B/Bangladesh/11001/2015	Q
B/Bangladesh/2003/2015	Q
B/Bangladesh/3006/2015	Q
B/Bangladesh/3015/2015	Q
B/Bangladesh/5007/2015	Q
B/Colorado/01/2016	Q
B/Congo/2335/2015	Q
B/Congo/2338/2015	Q
B/Congo/2364/2015	Q
B/Congo/2365/2015	Q
B/Congo/2367/2015	Q
B/Hawaii/36/2015	Q
B/Louisiana/01/2016	Q
B/Montana/01/2016	Q
B/Nakhonratchasima/592/2015	Q
B/New_Hampshire/01/2016	Q
B/New_York/25/2015	Q
B/Nonthaburi/591/2015	Q
B/North_Dakota/01/2016	Q
B/Oregon/06/2015	Q
B/Oregon/08/2015	Q
B/Paraguay/6712/2015	Q
B/Utah/03/2016	Q
B/Utah/05/2016	Q
B/Utah/08/2016	Q
B/Washington/03/2016	Q
B/Washington/04/2016	Q
B/Washington/06/2016	Q
B/Washington/08/2016	Q
B/West_Virginia/01/2016	Q
B/Wisconsin/01/2016	Q
B/Wyoming/04/2016	Q
B/CHIBA/10/2015	Q
B/AICHI/25/2015	Q
B/FUKUSHIMA/36/2015	Q
B/FUKUSHIMA/37/2015	Q
B/FUKUSHIMA/38/2015	Q
B/SENDAI/12/2015	Q
B/MIE/12/2015	Q
B/SAITAMA/12/2015	Q
B/SHIZUOKA-C/1/2015	Q
B/KITAKYUSYU/1/2015	Q
B/Stockholm/1/2016	Q
B/Florida/85/2015	Q
B/Wisconsin/03/2016	Q
B/Wisconsin/04/2016	Q
B/Oregon/09/2015	Q
B/Texas/09/2016	Q
B/Mali/030_CS/2015	Q
B/Bangladesh/6263/2015	Q
B/Mali/037_CH/2015	Q
B/Mali/045_CH/2015	Q
B/Mali/070_CI/2015	Q
B/Bangladesh/3014/2015	Q
B/Bangladesh/203018/2015	Q
B/Kentucky/35/2015	Q
B/Mali/033_CH/2015	Q
B/Bangladesh/6306/2015	Q
B/Mali/021_CS/2015	Q
B/Stockholm/8/2015	Q
B/Stockholm/4/2016	Q
B/Rheinland-Pfalz/1/2016	Q
B/Yunnan-Simao/11289/2015	Q
B/Chongqing-Changshou/32/2015	Q
B/Sichuan-Gaoxin/18/2016	Q
B/Hubei-Jiangan/137/2016	Q
B/Sichuan-Ziliujing/1572/2015	Q
B/Guangxi-Xinbin/11000/2015	Q
B/Beijing-Huairou/12344/2015	Q
B/Chongqing-Banan/11058/2015	Q
B/Sichuan-Wenjiang/2270/2015	Q
B/Heilongjiang-Aihui/1703/2015	Q
B/Guangxi-Xixiangtang/11378/2015	Q
B/Jiangsu-Tianning/15/2016	Q
B/Rheinland-Pfalz/2/2016	Q
B/Sachsen-Anhalt/11/2016	Q
B/Sachsen-Anhalt/13/2016	Q
B/Austria/903860/2016	Q
B/Brazil/0527/2015	Q
B/Brazil/0641/2015	Q
B/Brazil/0580/2015	Q
B/Brazil/0583/2015	Q
B/Brazil/0584/2015	Q
B/Brazil/0587/2015	Q
B/Brazil/0589/2015	Q
B/Brazil/0590/2015	Q
B/Maryland/28/2015	Q
B/Pennsylvania/38/2015	Q
B/Washington/75/2015	Q
B/Washington/02/2016	Q
B/Pakistan/425/2015	Q
B/Pakistan/433/2015	Q
B/Washington/76/2015	Q
B/Washington/77/2015	Q
B/Chanthaburi/111/2015	Q
B/Chanthaburi/112/2015	Q
B/Chanthaburi/114/2015	Q
B/Nonthaburi/136/2015	Q
B/Chanthaburi/139/2015	Q
B/Chanthaburi/140/2015	Q
B/New_York/23/2015	Q
B/Nevada/01/2016	Q
B/Texas/02/2016	Q
B/New_Hampshire/02/2016	Q
B/Nebraska/01/2016	Q
B/Vietnam/278/2015	Q
B/Vietnam/274/2015	Q
B/Vietnam/275/2015	Q
B/Vietnam/277/2015	Q
B/Vietnam/281/2015	Q
B/Vietnam/283/2015	Q
B/Vietnam/273/2015	Q
B/Wyoming/05/2016	Q
B/Wyoming/06/2016	Q
B/Bangladesh/103009/2015	Q
B/Bangladesh/8010/2015	Q
B/Bangladesh/3003/2015	Q
B/Bangladesh/214014/2015	Q
B/Bangladesh/5204/2015	Q
B/Bangladesh/203015/2015	Q
B/Washington/09/2016	Q
B/Washington/10/2016	Q
B/Washington/72/2015	Q
B/New_York/22/2015	Q
B/Arizona/13/2015	Q
B/Arizona/18/2015	Q
B/Arizona/15/2015	Q
B/Utah/02/2016	Q
B/Oregon/05/2015	Q
B/Oregon/07/2015	Q
B/New_York/02/2016	Q
B/Washington/80/2015	Q
B/Washington/81/2015	Q
B/Alaska/01/2016	Q
B/Vermont/01/2016	Q
B/Florida/05/2016	Q
B/Texas/08/2016	Q
B/Florida/03/2016	Q
B/Arizona/22/2015	Q
B/Arizona/16/2015	Q
B/Arizona/17/2015	Q
B/Arizona/19/2015	Q
B/Arizona/20/2015	Q
B/Arizona/03/2016	Q
B/Utah/11/2016	Q
B/Utah/12/2016	Q
B/Utah/13/2016	Q
B/California/127/2015	Q
B/California/06/2016	Q
B/Iowa/01/2016	Q
B/Hawaii/37/2015	Q
B/Hawaii/01/2016	Q
B/Minnesota/01/2016	Q
B/Washington/17/2016	Q
B/Washington/13/2016	Q
B/Washington/14/2016	Q
B/Connecticut/01/2016	Q
B/Montana/04/2016	Q
B/California/08/2016	Q
B/California/10/2016	Q
B/Texas/11/2016	Q
B/Wisconsin/06/2016	Q
B/Wisconsin/07/2016	Q
B/British_Columbia/RV2476/2015	Q
B/WAKAYAMA-C/4/2016	Q
B/YAMAGUCHI/5/2016	Q
B/Antsirabe/3949/2015	Q
B/Ghana/DILI-15-0538/2015	Q
B/Ghana/DILI-15-0570/2015	Q
B/Ghana/FS-15-0470/2015	Q
B/Oman/6392/2015	Q
B/Singapore/EN091/2015	Q
B/Singapore/GP257/2015	Q
B/Singapore/GP274/2015	Q
B/Singapore/KK106/2015	Q
B/Singapore/TT122/2015	Q
B/Singapore/TT145/2015	Q
B/Singapore/TT162/2015	Q
B/Singapore/GP352/2015	Q
B/Singapore/GP360/2015	Q
B/Singapore/GP385/2015	Q
B/Singapore/GP404/2015	Q
B/Singapore/GP430/2015	Q
B/Singapore/KK242/2015	Q
B/Singapore/TT155/2015	Q
B/Singapore/TT210/2015	Q
B/Singapore/GP441/2015	Q
B/Singapore/GP466/2015	Q
B/Singapore/GP573/2015	Q
B/Singapore/KK280/2015	Q
B/Singapore/KK293/2015	Q
B/Singapore/KK350/2015	Q
B/Singapore/NUH001/2015	Q
B/Singapore/TT227/2015	Q
B/Singapore/TT261/2015	Q
B/Singapore/KK169/2015	Q
B/Singapore/TT393/2015	Q
B/Singapore/GP594/2015	Q
B/Singapore/GP663/2015	Q
B/Singapore/GP702/2015	Q
B/Singapore/KK364/2015	Q
B/Singapore/KK400/2015	Q
B/Singapore/TT480/2015	Q
B/Singapore/TT488/2015	Q
B/Singapore/KK581/2015	Q
B/Singapore/EN455/2015	Q
B/Singapore/GP1045/2015	Q
B/Singapore/GP1165/2015	Q
B/Singapore/GP1241/2015	Q
B/Singapore/KK544/2015	Q
B/Singapore/KK625/2015	Q
B/Singapore/TT733/2015	Q
B/Singapore/TT965/2015	Q
B/Singapore/NUH012/2015	Q
B/Singapore/EN463/2015	Q
B/Singapore/GP1347/2015	Q
B/Singapore/GP1406/2015	Q
B/Singapore/GP1445/2015	Q
B/Singapore/GP1491/2015	Q
B/Singapore/GP1554/2015	Q
B/Singapore/GP1563/2015	Q
B/Singapore/KK684/2015	Q
B/Singapore/KK752/2015	Q
B/Singapore/TT1082/2015	Q
B/Singapore/EN559/2015	Q
B/Singapore/GP1604/2015	Q
B/Singapore/GP1628/2015	Q
B/Singapore/GP1661/2015	Q
B/Singapore/TT1155/2015	Q
B/Singapore/TT1206/2015	Q
B/Singapore/GP1689/2015	Q
B/Singapore/GP1733/2015	Q
B/Singapore/GP1737/2015	Q
B/Singapore/TT1258/2015	Q
B/Singapore/TT1257/2015	Q
B/Singapore/GP1827/2015	Q
B/Singapore/GP1837/2015	Q
B/Singapore/GP1871/2015	Q
B/Singapore/TT1269/2015	Q
B/Singapore/TT1287/2015	Q
B/Singapore/GP1898/2015	Q
B/Singapore/TT1294/2015	Q
B/Singapore/GP2005/2015	Q
B/Singapore/CGH124/2015	Q
B/Singapore/GP2045/2015	Q
B/Singapore/GP2112/2015	Q
B/Singapore/TT1323/2015	Q
B/Singapore/TT1353/2015	Q
B/Singapore/TT1363/2015	Q
B/Singapore/TT1331/2015	Q
B/Singapore/TT1373/2015	Q
B/Singapore/TT1362/2015	Q
B/Baleares/262/2016	Q
B/Brazil/0588/2015	Q
B/Ontario/RV2464/2015	Q
B/Puerto_Rico/03/2015	Q
B/Puerto_Rico/04/2015	Q
B/Tanzania/2116/2015	Q
B/Tanzania/665/2015	Q
B/Texas/01/2016	Q
B/New_Mexico/01/2016	Q
B/Texas/07/2016	Q
B/Kansas/01/2016	Q
B/Wyoming/01/2016	Q
B/Oklahoma/01/2016	Q
B/Pennsylvania/35/2015	Q
B/California/118/2015	Q
B/Arizona/02/2016	Q
B/Delaware/01/2016	Q
B/Tennessee/01/2016	Q
B/Tennessee/02/2016	Q
B/Alaska/02/2016	Q
B/Florida/07/2016	Q
B/Florida/12/2016	Q
B/Florida/14/2016	Q
B/Florida/16/2016	Q
B/Wyoming/07/2016	Q
B/Wyoming/08/2016	Q
B/Utah/17/2016	Q
B/Utah/18/2016	Q
B/Utah/50/2015	Q
B/Utah/51/2015	Q
B/Utah/54/2015	Q
B/New_York/06/2016	Q
B/New_York/07/2016	Q
B/Idaho/11/2016	Q
B/Idaho/12/2016	Q
B/Arizona/05/2016	Q
B/Arizona/06/2016	Q
B/California/21/2016	Q
B/California/22/2016	Q
B/Washington/21/2016	Q
B/Washington/22/2016	Q
B/Washington/23/2016	Q
B/Washington/28/2016	Q
B/Colorado/07/2016	Q
B/Pennsylvania/03/2016	Q
B/Oregon/06/2016	Q
B/Oregon/09/2016	Q
B/Oregon/11/2016	Q
B/Oregon/12/2016	Q
B/Oregon/13/2016	Q
B/Oregon/15/2016	Q
B/Nepal/2209/2015	Q
B/SAPPORO/12/2016	Q
B/Nepal/128/2015	Q
B/Nepal/406/2015	Q
B/Nepal/466/2015	Q
B/Nepal/512/2015	Q
B/Nepal/1977/2015	Q
B/Nepal/2152/2015	Q
B/YOKOHAMA/6/2016	Q
B/TOKYO/EH9/2016	Q
B/KANAGAWA/ZC3/2016	Q
B/KANAGAWA/ZC6/2016	Q
B/TOYAMA/37/2015	Q
B/SAKAI/1/2016	Q
B/AKITA/2/2016	Q
B/IWATE/2/2016	Q
B/KANAGAWA/1/2016	Q
B/MIE/4/2016	Q
B/NARA/5/2016	Q
B/HAMAMATU-C/16/2016	Q
B/Bucuresti/194094/2016	Q
B/NIIGATA/1319/2015	Q
B/TOKUSHIMA/1/2016	Q
B/HYOGO/2008/2016	Q
B/SHIZUOKA-C/6/2016	Q
B/AICHI/7/2016	Q
B/OSAKA/6/2016	Q
B/HIROSHIMA/9/2016	Q
B/Morocco/176H/2015	Q
B/Lisboa/niRL49_15-16/2016	Q
B/Lisboa/niRL52_15-16/2016	Q
B/Belgium/G0771/2015	Q
B/Italy-FVG/19/2015	Q
B/Oman/6340/2015	Q
B/Oman/6341/2015	Q
B/Oman/6390/2015	Q
B/Zambia/04-00354/2015	Q
B/Zambia/04-00361/2015	Q
B/Zambia/04-00379/2015	Q
B/Zambia/04-00384/2015	Q
B/Zambia/04-00397/2015	Q
B/Zambia/04-00413/2015	Q
B/Massachusetts/02/2012_(14/118)	Q
B/NAGANO/2079/2016	Q
B/EHIME/4/2016	Q
B/SENDAI/3/2016	Q
B/ISHIKAWA/28/2016	Q
B/TOCHIGI/16205/2016	Q
B/Navarra/1081/2016	Q
B/Austria/907115/2016	Q
B/Austria/907371/2016	Q
B/Brazil/0481/2015	Q
B/Brazil/0565/2015	Q
B/Mali/036_MOP/2015	Q
B/Washington/73/2015	Q
B/Washington/05/2016	Q
B/Tanzania/2096/2015	Q
B/Guatemala/5800/2015	Q
B/Guatemala/140/2015	Q
B/New_Jersey/13/2015	Q
B/Cote_D'Ivoire/1689/2015	Q
B/Cote_D'Ivoire/2058/2015	Q
B/Cote_D'Ivoire/1756/2015	Q
B/Cote_D'Ivoire/1770/2015	Q
B/Cote_D'Ivoire/1865/2015	Q
B/Cote_D'Ivoire/2134/2015	Q
B/Cote_D'Ivoire/1914/2015	Q
B/India/3184/2015	Q
B/India/6470/2015	Q
B/India/0034/2015	Q
B/Pennsylvania/01/2016	Q
B/Kansas/02/2016	Q
B/Virginia/02/2016	Q
B/Virginia/03/2016	Q
B/Georgia/01/2016	Q
B/Vietnam/279/2015	Q
B/Vietnam/272/2015	Q
B/Nevada/30/2015	Q
B/Wyoming/02/2016	Q
B/Bangladesh/203011/2015	Q
B/Bangladesh/208013/2015	Q
B/Bangladesh/10013/2015	Q
B/Bangladesh/13012/2015	Q
B/Hong_Kong/50/2016	Q
B/Hong_Kong/52/2016	Q
B/Hong_Kong/59/2016	Q
B/Burkina_Faso/1607/2015	Q
B/Burkina_Faso/73/2015	Q
B/Burkina_Faso/1639/2015	Q
B/Burkina_Faso/118/2015	Q
B/Maine/01/2016	Q
B/Maine/04/2016	Q
B/Mississippi/02/2016	Q
B/Mexico/2425/2015	Q
B/Mexico/323/2016	Q
B/Bahrain/88/2016	Q
B/Idaho/01/2016	Q
B/California/123/2015	Q
B/Washington/82/2015	Q
B/Connecticut/02/2016	Q
B/Montana/03/2016	Q
B/California/17/2016	Q
B/California/18/2016	Q
B/California/19/2016	Q
B/Texas/14/2016	Q
B/Utah/26/2016	Q
B/Idaho/04/2016	Q
B/Idaho/10/2016	Q
B/California/20/2016	Q
B/California/23/2016	Q
B/Nevada/03/2016	Q
B/Nevada/04/2016	Q
B/Washington/19/2016	Q
B/Washington/20/2016	Q
B/Washington/24/2016	Q
B/Washington/25/2016	Q
B/Washington/29/2016	Q
B/Washington/30/2016	Q
B/Washington/31/2016	Q
B/Minnesota/03/2016	Q
B/Oregon/02/2016	Q
B/Oregon/03/2016	Q
B/Oregon/07/2016	Q
B/North_Carolina/03/2016	Q
B/North_Carolina/04/2016	Q
B/New_York/08/2016	Q
B/Oregon/08/2016	Q
B/Oregon/10/2016	Q
B/Delaware/05/2016	Q
B/Delaware/06/2016	Q
B/Montana/05/2016	Q
B/Montana/06/2016	Q
[truncated: 17,506 more rows]

## Sheet: Summary
HA1 site 122	percentage (Victoria)	percentage (Yamagata)
-	0.00165135	0.00225583
H	0.978871	0.000717765
L	0.000762163	0
N	0.00177838	0
Q	0.0141424	0.977339
R	0.00088919	0.000666496
X	0.000211712	5.12689e-05
Y	0.00148198	0
K	0.000211712	0.0187644
S	0	0.000153807
P	0	5.12689e-05
