# Supplementary material for: Genomic epidemiology of influenza B circulation in China during prolonged border closure from 2020 to 2021
Source: Research Square preprint supplement (doi:10.21203/rs.3.rs-1432770/v1), 2022-03-09
Supplement: Supplementary file 2 [file d64b8e58f4a8a0c60c1f0d64.xlsx]

## Sheet: Sheet1
Isolate_Id	Location	Collection_Date	Isolate_Name	Originating_Lab	Submitting_Lab	Authors
EPI_ISL_1015525	Asia / China	2020-12-01	B/Jiangxi-Yuanzhou/12007/2020	WHO Chinese National Influenza Center	Centers for Disease Control and Prevention	NA
EPI_ISL_1015526	Asia / China	2020-12-03	B/Guizhou-Douyun/11021/2020	WHO Chinese National Influenza Center	Centers for Disease Control and Prevention	NA
EPI_ISL_1015527	Asia / China	2020-03-10	B/Yunnan-Qilin/1121/2020	WHO Chinese National Influenza Center	Centers for Disease Control and Prevention	NA
EPI_ISL_1015528	Asia / China	2020-12-04	B/Jiangxi-Yushui/386/2020	WHO Chinese National Influenza Center	Centers for Disease Control and Prevention	NA
EPI_ISL_1034779	Asia / Oman	2021-01-17	B/Salalah/7211353/2021	Central Public Health Laboratory, Ministry of Health	Crick Worldwide Influenza Centre	NA
EPI_ISL_1034792	Africa / Senegal	2020-10-20	B/Dakar/11/2020	Institut Pasteur de Dakar	Crick Worldwide Influenza Centre	NA
EPI_ISL_1041031	Asia / Philippines / Quezon	2020-01-20	B/Philippines/4/2020	Research Institute of Tropical Medicine	WHO Collaborating Centre for Reference and Research on Influenza	Soppe,S; Rynehart, C; Peck,H; Aziz,A; Komadina,N
EPI_ISL_1055766	Europe / Sweden / Stockholms lan	2021-01-30	B/Stockholm/1/2021	Klinisk mikrobiologi, Karolinska Universitetslaboratoriet, Karolinska Universitetssjukhuset Solna	Public Health Agency of Sweden	NA
EPI_ISL_1064156	North America / United States / Michigan	2020-12-20	B/Michigan/105/2020	Michigan Department of Community Health	Centers for Disease Control and Prevention	NA
EPI_ISL_1064158	Asia / Bahrain	2021-01-07	B/Bahrain/3759/2021	Ministry of Health Bahrain	Centers for Disease Control and Prevention	NA
EPI_ISL_1064159	Asia / Bahrain	2021-01-15	B/Bahrain/1305/2021	Ministry of Health Bahrain	Centers for Disease Control and Prevention	NA
EPI_ISL_1064160	Asia / United Arab Emirates	2020-12-15	B/Abu Dhabi/3511581/2020	Shaikh Khalifa Medical City	Centers for Disease Control and Prevention	NA
EPI_ISL_1064161	Asia / Vietnam	2020-01-14	B/Vietnam/Vnhcm-Gs26/2020	Pasteur Institute, Influenza Laboratory	Centers for Disease Control and Prevention	NA
EPI_ISL_1064162	Asia / Bahrain	2021-01-15	B/Bahrain/1305/2021	Ministry of Health Bahrain	Centers for Disease Control and Prevention	NA
EPI_ISL_1180161	Africa / Nigeria	2020-11-09	B/Nigeria/4969/2020	NCDC Public Health Reference Laboratory	Centers for Disease Control and Prevention	NA
EPI_ISL_1180162	Africa / Nigeria	2020-12-01	B/Nigeria/5069/2020	NCDC Public Health Reference Laboratory	Centers for Disease Control and Prevention	NA
EPI_ISL_1296464	Asia / Vietnam	2019-10-09	B/Vietnam/Vnhcm-Gs514/2019	Pasteur Institute, Influenza Laboratory	Centers for Disease Control and Prevention	NA
EPI_ISL_1296466	Asia / Vietnam	2019-06-30	B/Vietnam/Vnhcm-Vp69/2019	Pasteur Institute, Influenza Laboratory	Centers for Disease Control and Prevention	NA
EPI_ISL_1296468	Asia / Vietnam	2019-07-25	B/Vietnam/Vnhcm-Gs353/2019	Pasteur Institute, Influenza Laboratory	Centers for Disease Control and Prevention	NA
EPI_ISL_1296471	Asia / Vietnam	2019-09-29	B/Vietnam/Vnhcm-Gs479/2019	Pasteur Institute, Influenza Laboratory	Centers for Disease Control and Prevention	NA
EPI_ISL_1296472	Asia / Vietnam	2019-08-12	B/Vietnam/Vnhcm-Gs383/2019	Pasteur Institute, Influenza Laboratory	Centers for Disease Control and Prevention	NA
EPI_ISL_1296473	Asia / Vietnam	2019-08-05	B/Vietnam/Vnhcm-Gs378/2019	Pasteur Institute, Influenza Laboratory	Centers for Disease Control and Prevention	NA
EPI_ISL_1296474	Asia / Vietnam	2019-08-15	B/Vietnam/Vnhcm-Gs395/2019	Pasteur Institute, Influenza Laboratory	Centers for Disease Control and Prevention	NA
EPI_ISL_1296476	Asia / Vietnam	2019-10-09	B/Vietnam/Vnhcm-Gs514/2019	Pasteur Institute, Influenza Laboratory	Centers for Disease Control and Prevention	NA
EPI_ISL_1296477	Asia / United Arab Emirates	2020-12-15	B/Abu Dhabi/3511581/2020	Shaikh Khalifa Medical City	Centers for Disease Control and Prevention	NA
EPI_ISL_1296478	Asia / Bahrain	2021-01-07	B/Bahrain/3759/2021	Ministry of Health Bahrain	Centers for Disease Control and Prevention	NA
EPI_ISL_1392892	Africa / Niger	2020-02-07	B/Niger/7756/2020	Centre de Recherche Medicale et Sanitaire (CERMES)	Centers for Disease Control and Prevention	NA
EPI_ISL_1392893	Africa / Niger	2020-02-04	B/Niger/7737/2020	Centre de Recherche Medicale et Sanitaire (CERMES)	Centers for Disease Control and Prevention	NA
EPI_ISL_1392894	Africa / Niger	2020-01-31	B/Niger/7722/2020	Centre de Recherche Medicale et Sanitaire (CERMES)	Centers for Disease Control and Prevention	NA
EPI_ISL_1392895	Africa / Niger	2020-01-17	B/Niger/7664/2020	Centre de Recherche Medicale et Sanitaire (CERMES)	Centers for Disease Control and Prevention	NA
EPI_ISL_1392897	Africa / Niger	2020-02-29	B/Niger/7917/2020	Centre de Recherche Medicale et Sanitaire (CERMES)	Centers for Disease Control and Prevention	NA
EPI_ISL_1392898	Africa / Niger	2020-01-16	B/Niger/7633/2020	Centre de Recherche Medicale et Sanitaire (CERMES)	Centers for Disease Control and Prevention	NA
EPI_ISL_1392899	Africa / Niger	2020-02-20	B/Niger/7820/2020	Centre de Recherche Medicale et Sanitaire (CERMES)	Centers for Disease Control and Prevention	NA
EPI_ISL_1392900	Africa / Niger	2020-01-13	B/Niger/7625/2020	Centre de Recherche Medicale et Sanitaire (CERMES)	Centers for Disease Control and Prevention	NA
EPI_ISL_1392901	Africa / Niger	2020-01-16	B/Niger/7644/2020	Centre de Recherche Medicale et Sanitaire (CERMES)	Centers for Disease Control and Prevention	NA
EPI_ISL_1392902	Africa / Niger	2020-11-02	B/Niger/8336/2020	Centre de Recherche Medicale et Sanitaire (CERMES)	Centers for Disease Control and Prevention	NA
EPI_ISL_1392903	Africa / Niger	2021-01-05	B/Niger/8692/2021	Centre de Recherche Medicale et Sanitaire (CERMES)	Centers for Disease Control and Prevention	NA
EPI_ISL_1392904	Africa / Niger	2020-02-20	B/Niger/7820/2020	Centre de Recherche Medicale et Sanitaire (CERMES)	Centers for Disease Control and Prevention	NA
EPI_ISL_1392905	Africa / Niger	2020-02-29	B/Niger/7917/2020	Centre de Recherche Medicale et Sanitaire (CERMES)	Centers for Disease Control and Prevention	NA
EPI_ISL_1519459	Europe / Austria	2021-01-09	B/Austria/1359417/2021	University of Vienna	Crick Worldwide Influenza Centre	NA
EPI_ISL_1519529	Asia / Lebanon	2020-02-02	B/Lebanon/16/2020	Centers for Disease Control and Prevention	Crick Worldwide Influenza Centre	NA
EPI_ISL_1519536	Europe / France	2020-10-15	B/Marseille/2777/2020	CNR Virus des Infections Respiratoires - France SUD	Crick Worldwide Influenza Centre	NA
EPI_ISL_1519543	Asia / Oman	2021-01-17	B/Salalah/7211353/2021	Central Public Health Laboratory, Ministry of Health	Crick Worldwide Influenza Centre	NA
EPI_ISL_1519547	Europe / Sweden	2021-01-19	B/Sundsvall/1/2021	Public Health Agency of Sweden	Crick Worldwide Influenza Centre	NA
EPI_ISL_1732532	Africa / Mali	2020-03-08	B/Mali/20059/2020	NIC Lab CVD-MALI	Centers for Disease Control and Prevention	NA
EPI_ISL_1732536	Africa / Niger	2020-01-13	B/Niger/7625/2020	Centre de Recherche Medicale et Sanitaire (CERMES)	Centers for Disease Control and Prevention	NA
EPI_ISL_1732537	Africa / Niger	2020-01-16	B/Niger/7633/2020	Centre de Recherche Medicale et Sanitaire (CERMES)	Centers for Disease Control and Prevention	NA
EPI_ISL_1732538	Africa / Niger	2020-01-31	B/Niger/7722/2020	Centre de Recherche Medicale et Sanitaire (CERMES)	Centers for Disease Control and Prevention	NA
EPI_ISL_1732539	Africa / Niger	2020-02-04	B/Niger/7737/2020	Centre de Recherche Medicale et Sanitaire (CERMES)	Centers for Disease Control and Prevention	NA
EPI_ISL_1732540	Africa / Niger	2020-01-17	B/Niger/7664/2020	Centre de Recherche Medicale et Sanitaire (CERMES)	Centers for Disease Control and Prevention	NA
EPI_ISL_1732541	Africa / Niger	2020-01-16	B/Niger/7644/2020	Centre de Recherche Medicale et Sanitaire (CERMES)	Centers for Disease Control and Prevention	NA
EPI_ISL_1760814	Europe / Sweden / Stockholms lan	2021-03-01	B/Stockholm/2/2021	Klinisk mikrobiologi, Karolinska Universitetslaboratoriet, Karolinska Universitetssjukhuset Solna	Public Health Agency of Sweden	NA
EPI_ISL_1760815	Europe / Sweden / Stockholms lan	2021-03-05	B/Stockholm/3/2021	Klinisk mikrobiologi, Karolinska Universitetslaboratoriet, Karolinska Universitetssjukhuset Solna	Public Health Agency of Sweden	NA
EPI_ISL_1760816	Europe / Sweden / Stockholms lan	2021-03-15	B/Stockholm/4/2021	Klinisk mikrobiologi, Karolinska Universitetslaboratoriet, Karolinska Universitetssjukhuset Solna	Public Health Agency of Sweden	NA
EPI_ISL_192616	North America / United States / Indiana	2015-04-27	B/Indiana/25/2015	Indiana State Department of Health Laboratories	Centers for Disease Control and Prevention	NA
EPI_ISL_194561	Oceania / Australia / Queensland / Gold Coast	2015-04-28	B/Brisbane/46/2015	Queensland Health Forensic and Scientific Services	WHO Collaborating Centre for Reference and Research on Influenza	Deng,Y-M.; Iannello,P.; Spirason,N.; Lau,H.; Komadina,N.
EPI_ISL_195498	North America / United States / Indiana	2015-04-27	B/Indiana/25/2015	Indiana State Department of Health Laboratories	Centers for Disease Control and Prevention	NA
EPI_ISL_196577	Oceania / Australia	2015-04-28	B/Brisbane/46/2015	WHO Collaborating Centre for Reference and Research on Influenza	Crick Worldwide Influenza Centre	NA
EPI_ISL_196614	North America / United States / Indiana	2015-04-27	B/Indiana/25/2015	Indiana State Department of Health Laboratories	Centers for Disease Control and Prevention	NA
EPI_ISL_197575	Oceania / Australia	2015-04-28	B/Brisbane/46/2015	WHO Collaborating Centre for Reference and Research on Influenza	Centers for Disease Control and Prevention	NA
EPI_ISL_200220	North America / United States	2015-04-27	B/INDIANA/25/2015	Centers for Disease Control and Prevention	Crick Worldwide Influenza Centre	NA
EPI_ISL_203272	North America / United States / Florida	2015-11-09	B/Florida/78/2015	Florida Department of Health-Jacksonville	Centers for Disease Control and Prevention	NA
EPI_ISL_207237	North America / United States / Florida	2015-11-09	B/Florida/78/2015	Florida Department of Health-Jacksonville	Centers for Disease Control and Prevention	NA
EPI_ISL_207365	North America / United States / Indiana	2015-04-27	B/Indiana/25/2015	Indiana State Department of Health Laboratories	Centers for Disease Control and Prevention	NA
EPI_ISL_207644	Europe / Ireland	2016-01-14	B/Ireland/3154/2016	UCD National Virus Reference Laboratory	UCD National Virus Reference Laboratory	Tuite, G
EPI_ISL_208362	Europe / Germany / Nordrhein-Westfalen	2016-01-04	B/Nordrhein-Westfalen/1/2016	NA	Robert Koch Institute Nationales Referenzzentrum f√ºr Influenza	Heider, A.; Wedde, M.; Schweiger, B.
EPI_ISL_208671	Europe / Germany	2016-01-04	B/Nordrhein-Westfalen/1/2016	Robert Koch Institute Nationales Referenzzentrum f√ºr Influenza	Crick Worldwide Influenza Centre	NA
EPI_ISL_208680	Europe / Ireland	2016-01-14	B/Ireland/3154/2016	UCD National Virus Reference Laboratory	Crick Worldwide Influenza Centre	NA
EPI_ISL_2107807	Europe / Russian Federation / Rostov Oblast	2021-03-01	B/Rostov/340V/2021	Center of Hygiene and Epidemiology in Rostov Region	State Research Center of Virology and Biotechnology (VECTOR)	Alexey,Danilenko; Ivan,Susloparov; Natalya,Kolosova; Natalya,Goncharova; Juliya,Bulanovich; Polina,Torzhkova; Alexander,Durymanov; Svetlana,Svyatchenko; Tatyana,Ilyicheva; Alexander,Ryzhikov
EPI_ISL_2107813	Europe / Russian Federation / Sverdlovsk Oblast	2020-12-25	B/Yekaterinburg/3291V/2020	FBUZ "Center of hygiene and epidemiology" in Sverdlovsk oblast	State Research Center of Virology and Biotechnology (VECTOR)	Alexey,Danilenko; Ivan,Susloparov; Natalya,Kolosova; Natalya,Goncharova; Juliya,Bulanovich; Polina,Torzhkova; Alexander,Durymanov; Svetlana,Svyatchenko; Tatyana,Ilyicheva; Alexander,Ryzhikov
EPI_ISL_2107815	Europe / Russian Federation / Sverdlovsk Oblast	2020-12-22	B/Yekaterinburg/3292V/2020	FBUZ "Center of hygiene and epidemiology" in Sverdlovsk oblast	State Research Center of Virology and Biotechnology (VECTOR)	Alexey,Danilenko; Ivan,Susloparov; Natalya,Kolosova; Natalya,Goncharova; Juliya,Bulanovich; Polina,Torzhkova; Alexander,Durymanov; Svetlana,Svyatchenko; Tatyana,Ilyicheva; Alexander,Ryzhikov
EPI_ISL_2107820	Europe / Russian Federation / Tyumen Oblast	2021-03-24	B/Tyumen/343V/2021	FBUZ Center of Hygiene and Epidemiology in Tyumen oblast	State Research Center of Virology and Biotechnology (VECTOR)	Alexey,Danilenko; Ivan,Susloparov; Natalya,Kolosova; Natalya,Goncharova; Juliya,Bulanovich; Polina,Torzhkova; Alexander,Durymanov; Svetlana,Svyatchenko; Tatyana,Ilyicheva; Alexander,Ryzhikov
EPI_ISL_211892	Oceania / Australia	2015-04-28	B/BRISBANE/46/2015	WHO Collaborating Centre for Reference and Research on Influenza	National Institute of Infectious Diseases (NIID)	Takashita,Emi; Fujisaki,Seiichiro; Shirakura,Masayuki; Watanabe,Shinji; Odagiri,Takato
EPI_ISL_213683	Asia / Singapore	2015-09-04	B/Singapore/TT1243/2015	Ministry of Health, Singapore	Ministry of Health, Singapore	Chen,B.; Phuah,S.P.; Chen,S.L.; Yen,T.; Yeo,J.; Cui,L.; Lin,R.T.P.
EPI_ISL_214251	North America / United States / Florida	2015-11-09	B/Florida/78/2015	Florida Department of Health-Jacksonville	Centers for Disease Control and Prevention	NA
EPI_ISL_219054	Oceania / Australia / Queensland / Gold Coast	2015-04-28	B/Brisbane/46/2015	Queensland Health Forensic and Scientific Services	WHO Collaborating Centre for Reference and Research on Influenza	Deng,Y-M.; Iannello,P.; Spirason,N.; Lau,H; Komadina,N.
EPI_ISL_222811	Oceania / Australia / Queensland / Woorabinda	2015-11-27	B/Brisbane/312/2015	Queensland Health Forensic and Scientific Services	WHO Collaborating Centre for Reference and Research on Influenza	Deng,Y-M; Iannello,P.; Spirason,N.; Lau,H.; Komadina,N
EPI_ISL_224613	Europe / Slovenia	2016-05-01	B/Slovenia/1604/2016	Laboratory for Virology, National Institute of Public Health	Crick Worldwide Influenza Centre	NA
EPI_ISL_227610	Oceania / Australia / Queensland / Cairns	2016-04-16	B/Townsville/8/2016	Queensland Health Forensic and Scientific Services	WHO Collaborating Centre for Reference and Research on Influenza	Deng,Y-M.; Iannello,P.; Sprirason,N.; Lau,H.; Komadina,N.
EPI_ISL_232271	North America / United States / Wisconsin	2016-06-03	B/Wisconsin/44/2016	Wisconsin State Laboratory of Hygiene	Centers for Disease Control and Prevention	NA
EPI_ISL_232335	Europe / Russian Federation	2016-04-20	B/St Petersburg/293/2016	Russian Academy of Medical Sciences	Centers for Disease Control and Prevention	NA
EPI_ISL_232505	Europe / Russian Federation / Vologda Oblast	2016-06-09	B/Vologda/CRIE-323/2016	NA	Central Research Institute of Epidemiology	Svetlana,Yatsyshina; Anna,Renteeva; Anna,Valdokhina; Maria,Elkina; German,Shipulin
EPI_ISL_233691	South America / Brazil	2016-07-11	B/Brazil/5247/2016	Instituto Adolfo Lutz	Centers for Disease Control and Prevention	NA
EPI_ISL_233736	North America / United States / Indiana	2015-04-27	B/Indiana/25/2015	Indiana State Department of Health Laboratories	Centers for Disease Control and Prevention	NA
EPI_ISL_235571	Europe / Russian Federation	2016-04-20	B/St Petersburg/293/2016	Russian Academy of Medical Sciences	Centers for Disease Control and Prevention	NA
EPI_ISL_2378894	Europe / Austria	2021-03-16	B/Austria/1359417/2021	Crick Worldwide Influenza Centre	WHO Collaborating Centre for Reference and Research on Influenza	Deng,Y-M; Iannello,P; Lau,H; Spirason,N; Moselen,J; Aziz,A; Komadina,N.
EPI_ISL_237894	North America / United States	2015-11-09	B/Florida/78/2015	Centers for Disease Control and Prevention	WHO Collaborating Centre for Reference and Research on Influenza	Deng,Y-M,; Iannello,P.; Spirason,N.; Lau,H.; Kaye,M.; Komadina,N.
EPI_ISL_2378972	Europe / France / Paris	2021-03-16	B/Paris/9878/2020	Crick Worldwide Influenza Centre	WHO Collaborating Centre for Reference and Research on Influenza	Deng,Y-M; Iannello,P; Lau,H; Spirason,N; Moselen,J; Aziz,A; Komadina,N.
EPI_ISL_243867	North America / United States / Maryland	2016-12-27	B/Maryland/15/2016	Maryland Department of Health and Mental Hygiene	Centers for Disease Control and Prevention	NA
EPI_ISL_247745	Asia / Japan	2017-01-17	B/KANAGAWA/AC1623/2017	National Institute of Infectious Diseases (NIID)	National Institute of Infectious Diseases (NIID)	Kuwahara,Tomoko;Takashita,Emi;Fujisaki,Seiichiro;Shirakura,Masayuki;Watanabe,Shinji;Odagiri,Takato
EPI_ISL_249920	North America / United States / Maryland	2016-12-27	B/Maryland/15/2016	Maryland Department of Health and Mental Hygiene	Centers for Disease Control and Prevention	NA
EPI_ISL_253059	Europe / Russian Federation	2016-04-20	B/St Petersburg/293/2016	Russian Academy of Medical Sciences	Centers for Disease Control and Prevention	NA
EPI_ISL_253063	Europe / Russian Federation	2016-04-20	B/St Petersburg/293/2016	Russian Academy of Medical Sciences	Centers for Disease Control and Prevention	NA
EPI_ISL_255797	North America / United States / Maryland	2016-12-27	B/Maryland/15/2016	Maryland Department of Health and Mental Hygiene	Centers for Disease Control and Prevention	NA
EPI_ISL_257968	North America / United States / Louisiana	2017-03-06	B/Louisiana/10/2017	Louisiana Department of Health and Hospitals	Centers for Disease Control and Prevention	NA
EPI_ISL_259047	Asia / Japan	2017-01-17	B/KANAGAWA/AC1623/2017	National Institute of Infectious Diseases (NIID)	National Institute of Infectious Diseases (NIID)	Kuwahara,Tomoko;Takashita,Emi;Fujisaki,Seiichiro;Shirakura,Masayuki;Watanabe,Shinji;Odagiri,Takato
EPI_ISL_263978	Europe / Norway / Akershus	2017-04-27	B/Norway/2409/2017	NA	Norwegian Institute of Public Health	Bragstad, K; Waalen, K; Hungnes, O
EPI_ISL_266993	Europe / Norway	2017-04-27	B/Norway/2409/2017	WHO National Influenza Centre	Crick Worldwide Influenza Centre	NA
EPI_ISL_268030	Europe / Norway	2017-04-27	B/Norway/2409/2017	WHO National Influenza Centre	Crick Worldwide Influenza Centre	NA
EPI_ISL_268468	Asia / Bangladesh	2017-04-11	B/Bangladesh/3004/2017	icddr,b International Centre for Diarrhoeal Disease Research, Bangladesh	Centers for Disease Control and Prevention	NA
EPI_ISL_268847	North America / United States / Louisiana	2017-03-06	B/Louisiana/10/2017	Louisiana Department of Health and Hospitals	Centers for Disease Control and Prevention	NA
EPI_ISL_2695886	Asia / China / Neimenggu	2021-04-05	B/Neimenggu-Donghe/1330/2021	WHO Chinese National Influenza Center	WHO Chinese National Influenza Center	Li Xiyan, Liu Jia, Dayan Wang
EPI_ISL_2695887	Asia / China / Hunan	2021-04-02	B/Hunan-Wuling/11182/2021	WHO Chinese National Influenza Center	WHO Chinese National Influenza Center	Li Xiyan, Liu Jia, Dayan Wang
EPI_ISL_2695888	Asia / China / Jiangxi	2021-03-17	B/Jiangxi-Anyuan/1215/2021	WHO Chinese National Influenza Center	WHO Chinese National Influenza Center	Li Xiyan, Liu Jia, Dayan Wang
EPI_ISL_2695889	Asia / China / Hunan	2021-03-15	B/Hunan-Lusong/1232/2021	WHO Chinese National Influenza Center	WHO Chinese National Influenza Center	Li Xiyan, Liu Jia, Dayan Wang
EPI_ISL_2695890	Asia / China / Hunan	2021-03-15	B/Hunan-Lusong/1232/2021	WHO Chinese National Influenza Center	WHO Chinese National Influenza Center	Li Xiyan, Liu Jia, Dayan Wang
EPI_ISL_2695891	Asia / China / Hunan	2021-03-15	B/Hunan-Tianyuan/1282/2021	WHO Chinese National Influenza Center	WHO Chinese National Influenza Center	Li Xiyan, Liu Jia, Dayan Wang
EPI_ISL_2695892	Asia / China / Guizhou	2021-03-15	B/Guizhou-Kaili/1221/2021	WHO Chinese National Influenza Center	WHO Chinese National Influenza Center	Li Xiyan, Liu Jia, Dayan Wang
EPI_ISL_2695893	Asia / China / Hunan	2021-03-15	B/Hunan-Tianyuan/1288/2021	WHO Chinese National Influenza Center	WHO Chinese National Influenza Center	Li Xiyan, Liu Jia, Dayan Wang
EPI_ISL_2695894	Asia / China / Henan	2021-03-15	B/Henan-Zhaoling/1204/2021	WHO Chinese National Influenza Center	WHO Chinese National Influenza Center	Li Xiyan, Liu Jia, Dayan Wang
EPI_ISL_2695895	Asia / China / Jiangxi	2021-03-15	B/Jiangxi-Xinzhou/1248/2021	WHO Chinese National Influenza Center	WHO Chinese National Influenza Center	Li Xiyan, Liu Jia, Dayan Wang
EPI_ISL_2695896	Asia / China / Zhejiang	2021-03-15	B/Zhejiang-Yongkang/1274/2021	WHO Chinese National Influenza Center	WHO Chinese National Influenza Center	Li Xiyan, Liu Jia, Dayan Wang
EPI_ISL_2695897	Asia / China / Zhejiang	2021-03-15	B/Zhejiang-Yongkang/1274/2021	WHO Chinese National Influenza Center	WHO Chinese National Influenza Center	Li Xiyan, Liu Jia, Dayan Wang
EPI_ISL_2695898	Asia / China / Hubei	2021-03-15	B/Hubei-Xianan/31/2021	WHO Chinese National Influenza Center	WHO Chinese National Influenza Center	Li Xiyan, Liu Jia, Dayan Wang
EPI_ISL_2695899	Asia / China / Hubei	2021-03-15	B/Hubei-Xianan/31/2021	WHO Chinese National Influenza Center	WHO Chinese National Influenza Center	Li Xiyan, Liu Jia, Dayan Wang
EPI_ISL_2695900	Asia / China / Hubei	2021-03-15	B/Hubei-Liangzihu/32/2021	WHO Chinese National Influenza Center	WHO Chinese National Influenza Center	Li Xiyan, Liu Jia, Dayan Wang
EPI_ISL_2695901	Asia / China / Hubei	2021-03-15	B/Hubei-Liangzihu/32/2021	WHO Chinese National Influenza Center	WHO Chinese National Influenza Center	Li Xiyan, Liu Jia, Dayan Wang
EPI_ISL_2695902	Asia / China / Hubei	2021-03-15	B/Hubei-Qiaokou/1178/2021	WHO Chinese National Influenza Center	WHO Chinese National Influenza Center	Li Xiyan, Liu Jia, Dayan Wang
EPI_ISL_2695903	Asia / China / Hubei	2021-03-15	B/Hubei-Qiaokou/1178/2021	WHO Chinese National Influenza Center	WHO Chinese National Influenza Center	Li Xiyan, Liu Jia, Dayan Wang
EPI_ISL_2695904	Asia / China / Hunan	2021-03-15	B/Hunan-Jishou/1433/2021	WHO Chinese National Influenza Center	WHO Chinese National Influenza Center	Li Xiyan, Liu Jia, Dayan Wang
EPI_ISL_2695905	Asia / China / Hunan	2021-03-15	B/Hunan-Jishou/1433/2021	WHO Chinese National Influenza Center	WHO Chinese National Influenza Center	Li Xiyan, Liu Jia, Dayan Wang
EPI_ISL_2695906	Asia / China / Gansu	2021-03-15	B/Gansu-Minxian/337/2021	WHO Chinese National Influenza Center	WHO Chinese National Influenza Center	Li Xiyan, Liu Jia, Dayan Wang
EPI_ISL_2695907	Asia / China / Hunan	2021-03-15	B/Hunan-Yuhua/1404/2021	WHO Chinese National Influenza Center	WHO Chinese National Influenza Center	Li Xiyan, Liu Jia, Dayan Wang
EPI_ISL_2695908	Asia / China / Guangdong	2021-03-15	B/Guangdong-Doumen/52/2021	WHO Chinese National Influenza Center	WHO Chinese National Influenza Center	Li Xiyan, Liu Jia, Dayan Wang
EPI_ISL_2695909	Asia / China / Yunnan	2021-03-12	B/Yunnan-Linxiang/126/2021	WHO Chinese National Influenza Center	WHO Chinese National Influenza Center	Li Xiyan, Liu Jia, Dayan Wang
EPI_ISL_2695912	Asia / China / Ningxia	2021-03-10	B/Ningxia-Shapotou/1200/2021	WHO Chinese National Influenza Center	WHO Chinese National Influenza Center	Li Xiyan, Liu Jia, Dayan Wang
EPI_ISL_2695913	Asia / China / Ningxia	2021-03-10	B/Ningxia-Shapotou/1200/2021	WHO Chinese National Influenza Center	WHO Chinese National Influenza Center	Li Xiyan, Liu Jia, Dayan Wang
EPI_ISL_2695914	Asia / China / Zhejiang	2021-03-10	B/Zhejiang-Jiaojiang/1209/2021	WHO Chinese National Influenza Center	WHO Chinese National Influenza Center	Li Xiyan, Liu Jia, Dayan Wang
EPI_ISL_2695915	Asia / China / Zhejiang	2021-03-10	B/Zhejiang-Wenling/2273/2021	WHO Chinese National Influenza Center	WHO Chinese National Influenza Center	Li Xiyan, Liu Jia, Dayan Wang
EPI_ISL_2695916	Asia / China / Guangdong	2021-03-10	B/Guangdong-Zhenjiang/1193/2021	WHO Chinese National Influenza Center	WHO Chinese National Influenza Center	Li Xiyan, Liu Jia, Dayan Wang
EPI_ISL_2695917	Asia / China / Gansu	2021-03-10	B/Gansu-Jingyuan/1190/2021	WHO Chinese National Influenza Center	WHO Chinese National Influenza Center	Li Xiyan, Liu Jia, Dayan Wang
EPI_ISL_2695918	Asia / China / Shanghai	2021-03-09	B/Shanghai-Changning/1249/2021	WHO Chinese National Influenza Center	WHO Chinese National Influenza Center	Li Xiyan, Liu Jia, Dayan Wang
EPI_ISL_2695919	Asia / China / Zhejiang	2021-03-08	B/Zhejiang-Yiwu/1226/2021	WHO Chinese National Influenza Center	WHO Chinese National Influenza Center	Li Xiyan, Liu Jia, Dayan Wang
EPI_ISL_2695920	Asia / China / Guizhou	2021-03-08	B/Guizhou-Kaili/1212/2021	WHO Chinese National Influenza Center	WHO Chinese National Influenza Center	Li Xiyan, Liu Jia, Dayan Wang
EPI_ISL_2695921	Asia / China / Guangdong	2021-03-08	B/Guangdong-Zhenjiang/1184/2021	WHO Chinese National Influenza Center	WHO Chinese National Influenza Center	Li Xiyan, Liu Jia, Dayan Wang
EPI_ISL_2695922	Asia / China / Guangdong	2021-03-08	B/Guangdong-Pengjiang/38/2021	WHO Chinese National Influenza Center	WHO Chinese National Influenza Center	Li Xiyan, Liu Jia, Dayan Wang
EPI_ISL_2695923	Asia / China / Jiangxi	2021-03-08	B/Jiangxi-Zhushan/1203/2021	WHO Chinese National Influenza Center	WHO Chinese National Influenza Center	Li Xiyan, Liu Jia, Dayan Wang
EPI_ISL_2695924	Asia / China / Chongqing	2021-03-06	B/Chongqing-Qianjiang/1233/2021	WHO Chinese National Influenza Center	WHO Chinese National Influenza Center	Li Xiyan, Liu Jia, Dayan Wang
EPI_ISL_2695925	Asia / China / Jiangxi	2021-03-06	B/Jiangxi-Linchuan/1204/2021	WHO Chinese National Influenza Center	WHO Chinese National Influenza Center	Li Xiyan, Liu Jia, Dayan Wang
EPI_ISL_2695926	Asia / China / Jiangxi	2021-03-03	B/Jiangxi-Anyuan/1165/2021	WHO Chinese National Influenza Center	WHO Chinese National Influenza Center	Li Xiyan, Liu Jia, Dayan Wang
EPI_ISL_2695927	Asia / China / Guangdong	2021-03-03	B/Guangdong-Zhenjiang/1173/2021	WHO Chinese National Influenza Center	WHO Chinese National Influenza Center	Li Xiyan, Liu Jia, Dayan Wang
EPI_ISL_2695928	Asia / China	2021-03-03	B/Shanghai-Fengxian/1195/2021	WHO Chinese National Influenza Center	WHO Chinese National Influenza Center	Li Xiyan, Liu Jia, Dayan Wang
EPI_ISL_2695929	Asia / China / Jiangxi	2021-03-03	B/Jiangxi-Xihu/1220/2021	WHO Chinese National Influenza Center	WHO Chinese National Influenza Center	Li Xiyan, Liu Jia, Dayan Wang
EPI_ISL_2695930	Asia / China / Ningxia	2021-03-03	B/Ningxia-Shapotou/1178/2021	WHO Chinese National Influenza Center	WHO Chinese National Influenza Center	Li Xiyan, Liu Jia, Dayan Wang
EPI_ISL_2695931	Asia / China / Hunan	2021-03-02	B/Hunan-Yuhua/1334/2021	WHO Chinese National Influenza Center	WHO Chinese National Influenza Center	Li Xiyan, Liu Jia, Dayan Wang
EPI_ISL_2695932	Asia / China / Hunan	2021-03-02	B/Hunan-Yuhua/1334/2021	WHO Chinese National Influenza Center	WHO Chinese National Influenza Center	Li Xiyan, Liu Jia, Dayan Wang
EPI_ISL_2695933	Asia / China / Fujian	2021-03-02	B/Fujian-Sanyuan/2293/2021	WHO Chinese National Influenza Center	WHO Chinese National Influenza Center	Li Xiyan, Liu Jia, Dayan Wang
EPI_ISL_2695934	Asia / China / Guizhou	2021-03-02	B/Guizhou-Kaili/1189/2021	WHO Chinese National Influenza Center	WHO Chinese National Influenza Center	Li Xiyan, Liu Jia, Dayan Wang
EPI_ISL_2695935	Asia / China / Fujian	2021-03-02	B/Fujian-Jiaocheng/1430/2021	WHO Chinese National Influenza Center	WHO Chinese National Influenza Center	Li Xiyan, Liu Jia, Dayan Wang
EPI_ISL_2695936	Asia / China / Ningxia	2021-03-02	B/Ningxia-Shapotou/1174/2021	WHO Chinese National Influenza Center	WHO Chinese National Influenza Center	Li Xiyan, Liu Jia, Dayan Wang
EPI_ISL_2695937	Asia / China / Hunan	2021-03-02	B/Hunan-Louxin/1171/2021	WHO Chinese National Influenza Center	WHO Chinese National Influenza Center	Li Xiyan, Liu Jia, Dayan Wang
EPI_ISL_2695938	Asia / China / Zhejiang	2021-03-01	B/Zhejiang-Wuxin/1211/2021	WHO Chinese National Influenza Center	WHO Chinese National Influenza Center	Li Xiyan, Liu Jia, Dayan Wang
EPI_ISL_2695939	Asia / China / Zhejiang	2021-03-01	B/Zhejiang-Nanhu/1184/2021	WHO Chinese National Influenza Center	WHO Chinese National Influenza Center	Li Xiyan, Liu Jia, Dayan Wang
EPI_ISL_2695940	Asia / China / Zhejiang	2021-03-01	B/Zhejiang-Nanhu/1184/2021	WHO Chinese National Influenza Center	WHO Chinese National Influenza Center	Li Xiyan, Liu Jia, Dayan Wang
EPI_ISL_2695941	Asia / China / Guizhou	2021-03-01	B/Guizhou-Huichuan/1175/2021	WHO Chinese National Influenza Center	WHO Chinese National Influenza Center	Li Xiyan, Liu Jia, Dayan Wang
EPI_ISL_2695942	Asia / China / Fujian	2021-03-01	B/Fujian-Jiaocheng/1407/2021	WHO Chinese National Influenza Center	WHO Chinese National Influenza Center	Li Xiyan, Liu Jia, Dayan Wang
EPI_ISL_2695943	Asia / China / Fujian	2021-02-28	B/Fujian-Jiaocheng/1395/2021	WHO Chinese National Influenza Center	WHO Chinese National Influenza Center	Li Xiyan, Liu Jia, Dayan Wang
EPI_ISL_2695945	Asia / China / Zhejiang	2021-02-25	B/Zhejiang-Nanhu/1182/2021	WHO Chinese National Influenza Center	WHO Chinese National Influenza Center	Li Xiyan, Liu Jia, Dayan Wang
EPI_ISL_2695946	Asia / China / Henan	2021-02-24	B/Henan-Beiguan/1165/2021	WHO Chinese National Influenza Center	WHO Chinese National Influenza Center	Li Xiyan, Liu Jia, Dayan Wang
EPI_ISL_2695947	Asia / China / Gansu	2021-02-24	B/Gansu-Maoji/1153/2021	WHO Chinese National Influenza Center	WHO Chinese National Influenza Center	Li Xiyan, Liu Jia, Dayan Wang
EPI_ISL_2695948	Asia / China / Guizhou	2021-02-22	B/Guizhou-Huichuan/1158/2021	WHO Chinese National Influenza Center	WHO Chinese National Influenza Center	Li Xiyan, Liu Jia, Dayan Wang
EPI_ISL_2695949	Asia / China / Guizhou	2021-02-22	B/Guizhou-Huichuan/1158/2021	WHO Chinese National Influenza Center	WHO Chinese National Influenza Center	Li Xiyan, Liu Jia, Dayan Wang
EPI_ISL_2695950	Asia / China / Hunan	2021-02-22	B/Hunan-Kaifu/1146/2021	WHO Chinese National Influenza Center	WHO Chinese National Influenza Center	Li Xiyan, Liu Jia, Dayan Wang
EPI_ISL_2695951	Asia / China / Hubei	2021-02-22	B/Hubei-Jiangan/1224/2021	WHO Chinese National Influenza Center	WHO Chinese National Influenza Center	Li Xiyan, Liu Jia, Dayan Wang
EPI_ISL_2695952	Asia / China / Hubei	2021-02-22	B/Hubei-Jiangan/1224/2021	WHO Chinese National Influenza Center	WHO Chinese National Influenza Center	Li Xiyan, Liu Jia, Dayan Wang
EPI_ISL_2695953	Asia / China	2021-02-21	B/Shanghai-Huangpu/1210/2021	WHO Chinese National Influenza Center	WHO Chinese National Influenza Center	Li Xiyan, Liu Jia, Dayan Wang
EPI_ISL_2695954	Asia / China / Qinghai	2021-03-21	B/Qinghai-Yushu/1100/2021	WHO Chinese National Influenza Center	WHO Chinese National Influenza Center	Li Xiyan, Liu Jia, Dayan Wang
EPI_ISL_2695955	Asia / China / Guangdong	2021-04-12	B/Guangdong-Chikan/8137/2021	WHO Chinese National Influenza Center	WHO Chinese National Influenza Center	Li Xiyan, Liu Jia, Dayan Wang
EPI_ISL_2695956	Asia / China / Fujian	2021-04-13	B/Fujian-Jianou/324/2021	WHO Chinese National Influenza Center	WHO Chinese National Influenza Center	Li Xiyan, Liu Jia, Dayan Wang
EPI_ISL_2695957	Asia / China / Fujian	2021-04-13	B/Fujian-Jianou/324/2021	WHO Chinese National Influenza Center	WHO Chinese National Influenza Center	Li Xiyan, Liu Jia, Dayan Wang
EPI_ISL_2695958	Asia / China / Gansu	2021-04-13	B/Gansu-Jingyuan/1298/2021	WHO Chinese National Influenza Center	WHO Chinese National Influenza Center	Li Xiyan, Liu Jia, Dayan Wang
EPI_ISL_2695959	Asia / China / Jiangsu	2021-04-13	B/Jiangsu-Jurong/1286/2021	WHO Chinese National Influenza Center	WHO Chinese National Influenza Center	Li Xiyan, Liu Jia, Dayan Wang
EPI_ISL_2695961	Asia / China / Jiangxi	2021-04-14	B/Jiangxi-Xihu/1356/2021	WHO Chinese National Influenza Center	WHO Chinese National Influenza Center	Li Xiyan, Liu Jia, Dayan Wang
EPI_ISL_2695964	Asia / China / Hubei	2021-04-15	B/Hubei-Wujiagang/1411/2021	WHO Chinese National Influenza Center	WHO Chinese National Influenza Center	Li Xiyan, Liu Jia, Dayan Wang
EPI_ISL_2695965	Asia / China / Hubei	2021-04-15	B/Hubei-Wujiagang/1411/2021	WHO Chinese National Influenza Center	WHO Chinese National Influenza Center	Li Xiyan, Liu Jia, Dayan Wang
EPI_ISL_2695966	Asia / China / Qinghai	2021-04-18	B/Qinghai-Gonghe/1259/2021	WHO Chinese National Influenza Center	WHO Chinese National Influenza Center	Li Xiyan, Liu Jia, Dayan Wang
EPI_ISL_2695967	Asia / China / Gansu	2021-04-19	B/Gansu-Linxia/1521/2021	WHO Chinese National Influenza Center	WHO Chinese National Influenza Center	Li Xiyan, Liu Jia, Dayan Wang
EPI_ISL_2695968	Asia / China / Fujian	2021-04-20	B/Fujian-Zhangpu/318/2021	WHO Chinese National Influenza Center	WHO Chinese National Influenza Center	Li Xiyan, Liu Jia, Dayan Wang
EPI_ISL_2695969	Asia / China / Fujian	2021-04-20	B/Fujian-Zhangpu/318/2021	WHO Chinese National Influenza Center	WHO Chinese National Influenza Center	Li Xiyan, Liu Jia, Dayan Wang
EPI_ISL_2695970	Asia / China / Jiangxi	2021-04-21	B/Jiangxi-Donghu/1751/2021	WHO Chinese National Influenza Center	WHO Chinese National Influenza Center	Li Xiyan, Liu Jia, Dayan Wang
EPI_ISL_2695971	Asia / China / Jiangxi	2021-04-21	B/Jiangxi-Donghu/1751/2021	WHO Chinese National Influenza Center	WHO Chinese National Influenza Center	Li Xiyan, Liu Jia, Dayan Wang
EPI_ISL_2695972	Asia / China / Gansu	2021-04-23	B/Gansu-Jingyuan/320/2021	WHO Chinese National Influenza Center	WHO Chinese National Influenza Center	Li Xiyan, Liu Jia, Dayan Wang
EPI_ISL_2695973	Asia / China / Gansu	2021-04-26	B/Gansu-Linxia/1558/2021	WHO Chinese National Influenza Center	WHO Chinese National Influenza Center	Li Xiyan, Liu Jia, Dayan Wang
EPI_ISL_2695974	Asia / China / Gansu	2021-04-26	B/Gansu-Linxia/1558/2021	WHO Chinese National Influenza Center	WHO Chinese National Influenza Center	Li Xiyan, Liu Jia, Dayan Wang
EPI_ISL_2695975	Asia / China / Neimenggu	2021-04-26	B/Neimenggu-Kundoulun/1312/2021	WHO Chinese National Influenza Center	WHO Chinese National Influenza Center	Li Xiyan, Liu Jia, Dayan Wang
EPI_ISL_2695976	Asia / China / Jiangxi	2021-04-26	B/Jiangxi-Zhushan/1414/2021	WHO Chinese National Influenza Center	WHO Chinese National Influenza Center	Li Xiyan, Liu Jia, Dayan Wang
EPI_ISL_2695977	Asia / China / Hubei	2021-04-27	B/Hubei-Yuanan/232/2021	WHO Chinese National Influenza Center	WHO Chinese National Influenza Center	Li Xiyan, Liu Jia, Dayan Wang
EPI_ISL_2695978	Asia / China / Jiangxi	2021-03-31	B/Jiangxi-Zhanggong/539/2021	WHO Chinese National Influenza Center	WHO Chinese National Influenza Center	Li Xiyan, Liu Jia, Dayan Wang
EPI_ISL_2695979	Asia / China / Jiangxi	2021-04-05	B/Jiangxi-Zhanggong/1346/2021	WHO Chinese National Influenza Center	WHO Chinese National Influenza Center	Li Xiyan, Liu Jia, Dayan Wang
EPI_ISL_2695980	Asia / China / Jiangxi	2021-04-05	B/Jiangxi-Zhushan/1345/2021	WHO Chinese National Influenza Center	WHO Chinese National Influenza Center	Li Xiyan, Liu Jia, Dayan Wang
EPI_ISL_2695981	Asia / China / Chongqing	2021-04-06	B/Chongqing-Yubei/1388/2021	WHO Chinese National Influenza Center	WHO Chinese National Influenza Center	Li Xiyan, Liu Jia, Dayan Wang
EPI_ISL_2695982	Asia / China	2021-04-12	B/Henan-Jinshui/1269/2021	WHO Chinese National Influenza Center	WHO Chinese National Influenza Center	Li Xiyan, Liu Jia, Dayan Wang
EPI_ISL_2695983	Asia / China / Zhejiang	2021-04-12	B/Zhejiang-Kecheng/1343/2021	WHO Chinese National Influenza Center	WHO Chinese National Influenza Center	Li Xiyan, Liu Jia, Dayan Wang
EPI_ISL_2695984	Asia / China	2021-04-14	B/Henan-Dengfeng/311/2021	WHO Chinese National Influenza Center	WHO Chinese National Influenza Center	Li Xiyan, Liu Jia, Dayan Wang
EPI_ISL_2695985	Asia / China / Hunan	2021-04-18	B/Hunan-Jishou/1678/2021	WHO Chinese National Influenza Center	WHO Chinese National Influenza Center	Li Xiyan, Liu Jia, Dayan Wang
EPI_ISL_2695986	Asia / China / Hunan	2021-04-19	B/Hunan-Zhengxiang/322/2021	WHO Chinese National Influenza Center	WHO Chinese National Influenza Center	Li Xiyan, Liu Jia, Dayan Wang
EPI_ISL_2695987	Asia / China / Hunan	2021-04-19	B/Hunan-Zhengxiang/322/2021	WHO Chinese National Influenza Center	WHO Chinese National Influenza Center	Li Xiyan, Liu Jia, Dayan Wang
EPI_ISL_2695988	Asia / China / Zhejiang	2021-04-19	B/Zhejiang-Haishu/1785/2021	WHO Chinese National Influenza Center	WHO Chinese National Influenza Center	Li Xiyan, Liu Jia, Dayan Wang
EPI_ISL_2695989	Asia / China / Hunan	2021-04-20	B/Hunan-Yanfeng/1309/2021	WHO Chinese National Influenza Center	WHO Chinese National Influenza Center	Li Xiyan, Liu Jia, Dayan Wang
EPI_ISL_2695990	Asia / China / Hunan	2021-04-20	B/Hunan-Yanfeng/1309/2021	WHO Chinese National Influenza Center	WHO Chinese National Influenza Center	Li Xiyan, Liu Jia, Dayan Wang
EPI_ISL_2695991	Asia / China / Hunan	2021-04-22	B/Hunan-Jingzhoumiaozudongzuzizhi/35/2021	WHO Chinese National Influenza Center	WHO Chinese National Influenza Center	Li Xiyan, Liu Jia, Dayan Wang
EPI_ISL_2695992	Asia / China / Henan	2021-03-17	B/Henan-Luolong/1218/2021	WHO Chinese National Influenza Center	WHO Chinese National Influenza Center	Li Xiyan, Liu Jia, Dayan Wang
EPI_ISL_2695993	Asia / China / Qinghai	2021-03-20	B/Qinghai-Yushu/194/2021	WHO Chinese National Influenza Center	WHO Chinese National Influenza Center	Li Xiyan, Liu Jia, Dayan Wang
EPI_ISL_2695994	Asia / China / Hubei	2021-03-22	B/Hubei-Xianan/1346/2021	WHO Chinese National Influenza Center	WHO Chinese National Influenza Center	Li Xiyan, Liu Jia, Dayan Wang
EPI_ISL_2695995	Asia / China / Neimenggu	2021-03-23	B/Neimenggu-Dongsheng/1233/2021	WHO Chinese National Influenza Center	WHO Chinese National Influenza Center	Li Xiyan, Liu Jia, Dayan Wang
EPI_ISL_2695997	Asia / China / Guangxi	2021-03-30	B/Guangxi-Xixiangtang/1259/2021	WHO Chinese National Influenza Center	WHO Chinese National Influenza Center	Li Xiyan, Liu Jia, Dayan Wang
EPI_ISL_2695998	Asia / China / Hunan	2021-03-31	B/Hunan-Beihu/1542/2021	WHO Chinese National Influenza Center	WHO Chinese National Influenza Center	Li Xiyan, Liu Jia, Dayan Wang
EPI_ISL_2695999	Asia / China / Qinghai	2021-03-31	B/Qinghai-Yushu/1146/2021	WHO Chinese National Influenza Center	WHO Chinese National Influenza Center	Li Xiyan, Liu Jia, Dayan Wang
EPI_ISL_2696000	Asia / China / Neimenggu	2021-03-31	B/Neimenggu-Donghe/1323/2021	WHO Chinese National Influenza Center	WHO Chinese National Influenza Center	Li Xiyan, Liu Jia, Dayan Wang
EPI_ISL_2696001	Asia / China / Hubei	2021-04-01	B/Hubei-Wujiagang/1375/2021	WHO Chinese National Influenza Center	WHO Chinese National Influenza Center	Li Xiyan, Liu Jia, Dayan Wang
EPI_ISL_2696002	Asia / China / Hubei	2021-04-01	B/Hubei-Wujiagang/1375/2021	WHO Chinese National Influenza Center	WHO Chinese National Influenza Center	Li Xiyan, Liu Jia, Dayan Wang
EPI_ISL_2696003	Asia / China / Qinghai	2021-04-04	B/Qinghai-Yushu/1161/2021	WHO Chinese National Influenza Center	WHO Chinese National Influenza Center	Li Xiyan, Liu Jia, Dayan Wang
EPI_ISL_2696004	Asia / China / Hunan	2021-04-05	B/Hunan-Yuhua/1523/2021	WHO Chinese National Influenza Center	WHO Chinese National Influenza Center	Li Xiyan, Liu Jia, Dayan Wang
EPI_ISL_2696005	Asia / China / Neimenggu	2021-04-05	B/Neimenggu-Dongsheng/1276/2021	WHO Chinese National Influenza Center	WHO Chinese National Influenza Center	Li Xiyan, Liu Jia, Dayan Wang
EPI_ISL_2696006	Asia / China / Fujian	2021-04-05	B/Fujian-Siming/1339/2021	WHO Chinese National Influenza Center	WHO Chinese National Influenza Center	Li Xiyan, Liu Jia, Dayan Wang
EPI_ISL_2696007	Asia / China / Neimenggu	2021-04-05	B/Neimenggu-Dongsheng/1277/2021	WHO Chinese National Influenza Center	WHO Chinese National Influenza Center	Li Xiyan, Liu Jia, Dayan Wang
EPI_ISL_2696008	Asia / China / Hunan	2021-04-05	B/Hunan-Kaifu/1276/2021	WHO Chinese National Influenza Center	WHO Chinese National Influenza Center	Li Xiyan, Liu Jia, Dayan Wang
EPI_ISL_2696010	Asia / China / Sichuan	2021-04-09	B/Sichuan-Fucheng/1637/2021	WHO Chinese National Influenza Center	WHO Chinese National Influenza Center	Li Xiyan, Liu Jia, Dayan Wang
EPI_ISL_2696011	Asia / China / Gansu	2021-04-06	B/Gansu-Jingyuan/1281/2021	WHO Chinese National Influenza Center	WHO Chinese National Influenza Center	Li Xiyan, Liu Jia, Dayan Wang
EPI_ISL_2696012	Asia / China / Hunan	2021-04-10	B/Hunan-Beihu/1596/2021	WHO Chinese National Influenza Center	WHO Chinese National Influenza Center	Li Xiyan, Liu Jia, Dayan Wang
EPI_ISL_2696013	Asia / China / Hunan	2021-04-12	B/Hunan-Daxiang/1465/2021	WHO Chinese National Influenza Center	WHO Chinese National Influenza Center	Li Xiyan, Liu Jia, Dayan Wang
EPI_ISL_2696014	Asia / China / Henan	2021-04-12	B/Henan-Zhaoling/1269/2021	WHO Chinese National Influenza Center	WHO Chinese National Influenza Center	Li Xiyan, Liu Jia, Dayan Wang
EPI_ISL_2696015	Asia / China / Zhejiang	2021-04-12	B/Zhejiang-Yongkang/1370/2021	WHO Chinese National Influenza Center	WHO Chinese National Influenza Center	Li Xiyan, Liu Jia, Dayan Wang
EPI_ISL_2696016	Asia / China / Zhejiang	2021-04-12	B/Zhejiang-Yongkang/1370/2021	WHO Chinese National Influenza Center	WHO Chinese National Influenza Center	Li Xiyan, Liu Jia, Dayan Wang
EPI_ISL_2696017	Asia / China / Sichuan	2021-04-12	B/Sichuan-Qingyang/1885/2021	WHO Chinese National Influenza Center	WHO Chinese National Influenza Center	Li Xiyan, Liu Jia, Dayan Wang
EPI_ISL_2696018	Asia / China / Sichuan	2021-04-12	B/Sichuan-Qingyang/1885/2021	WHO Chinese National Influenza Center	WHO Chinese National Influenza Center	Li Xiyan, Liu Jia, Dayan Wang
EPI_ISL_2696019	Asia / China / Gansu	2021-04-12	B/Gansu-Jingyuan/1287/2021	WHO Chinese National Influenza Center	WHO Chinese National Influenza Center	Li Xiyan, Liu Jia, Dayan Wang
EPI_ISL_2696020	Asia / China	2021-04-15	B/Hunan-Tianyuan/386/2021	WHO Chinese National Influenza Center	WHO Chinese National Influenza Center	Li Xiyan, Liu Jia, Dayan Wang
EPI_ISL_2696022	Asia / China / Henan	2021-04-15	B/Henan-Jiefang/1312/2021	WHO Chinese National Influenza Center	WHO Chinese National Influenza Center	Li Xiyan, Liu Jia, Dayan Wang
EPI_ISL_2696023	Asia / China	2021-04-16	B/Yunnan-Malong/329/2021	WHO Chinese National Influenza Center	WHO Chinese National Influenza Center	Li Xiyan, Liu Jia, Dayan Wang
EPI_ISL_2696024	Asia / China / Hubei	2021-04-19	B/Hubei-Jiangan/1403/2021	WHO Chinese National Influenza Center	WHO Chinese National Influenza Center	Li Xiyan, Liu Jia, Dayan Wang
EPI_ISL_2696025	Asia / China / Hubei	2021-04-19	B/Hubei-Jiangan/1403/2021	WHO Chinese National Influenza Center	WHO Chinese National Influenza Center	Li Xiyan, Liu Jia, Dayan Wang
EPI_ISL_2696026	Asia / China / Gansu	2021-04-19	B/Gansu-Pingchuan/32/2021	WHO Chinese National Influenza Center	WHO Chinese National Influenza Center	Li Xiyan, Liu Jia, Dayan Wang
EPI_ISL_2696027	Asia / China	2021-03-16	B/Hunan-Tianyuan/338/2021	WHO Chinese National Influenza Center	WHO Chinese National Influenza Center	Li Xiyan, Liu Jia, Dayan Wang
EPI_ISL_2696028	Asia / China / Ningxia	2021-03-16	B/Ningxia-Shapotou/1214/2021	WHO Chinese National Influenza Center	WHO Chinese National Influenza Center	Li Xiyan, Liu Jia, Dayan Wang
EPI_ISL_2696029	Asia / China / Guangdong	2021-03-16	B/Guangdong-Zhongshan/1225/2021	WHO Chinese National Influenza Center	WHO Chinese National Influenza Center	Li Xiyan, Liu Jia, Dayan Wang
EPI_ISL_2696030	Asia / China / Jiangxi	2021-03-16	B/Jiangxi-Donghu/1468/2021	WHO Chinese National Influenza Center	WHO Chinese National Influenza Center	Li Xiyan, Liu Jia, Dayan Wang
EPI_ISL_2696031	Asia / China / Jiangxi	2021-03-16	B/Jiangxi-Yuehu/1292/2021	WHO Chinese National Influenza Center	WHO Chinese National Influenza Center	Li Xiyan, Liu Jia, Dayan Wang
EPI_ISL_2696034	Asia / China / Hainan	2021-03-17	B/Hainan-Meilan/33/2021	WHO Chinese National Influenza Center	WHO Chinese National Influenza Center	Li Xiyan, Liu Jia, Dayan Wang
EPI_ISL_2696035	Asia / China / Hainan	2021-03-17	B/Hainan-Meilan/39/2021	WHO Chinese National Influenza Center	WHO Chinese National Influenza Center	Li Xiyan, Liu Jia, Dayan Wang
EPI_ISL_2696036	Asia / China / Hainan	2021-03-17	B/Hainan-Meilan/316/2021	WHO Chinese National Influenza Center	WHO Chinese National Influenza Center	Li Xiyan, Liu Jia, Dayan Wang
EPI_ISL_2696037	Asia / China / Hainan	2021-03-17	B/Hainan-Meilan/32/2021	WHO Chinese National Influenza Center	WHO Chinese National Influenza Center	Li Xiyan, Liu Jia, Dayan Wang
EPI_ISL_2696039	Asia / China / Jiangxi	2021-03-17	B/Jiangxi-Zhanggong/52/2021	WHO Chinese National Influenza Center	WHO Chinese National Influenza Center	Li Xiyan, Liu Jia, Dayan Wang
EPI_ISL_2696040	Asia / China / Hainan	2021-03-17	B/Hainan-Meilan/31/2021	WHO Chinese National Influenza Center	WHO Chinese National Influenza Center	Li Xiyan, Liu Jia, Dayan Wang
EPI_ISL_2696041	Asia / China / Hainan	2021-03-17	B/Hainan-Meilan/311/2021	WHO Chinese National Influenza Center	WHO Chinese National Influenza Center	Li Xiyan, Liu Jia, Dayan Wang
EPI_ISL_2696042	Asia / China / Hunan	2021-03-17	B/Hunan-Yanfeng/1205/2021	WHO Chinese National Influenza Center	WHO Chinese National Influenza Center	Li Xiyan, Liu Jia, Dayan Wang
EPI_ISL_2696043	Asia / China / Hunan	2021-03-17	B/Hunan-Yanfeng/1205/2021	WHO Chinese National Influenza Center	WHO Chinese National Influenza Center	Li Xiyan, Liu Jia, Dayan Wang
EPI_ISL_2696044	Asia / China / Shanxi	2021-03-17	B/Shanxi-Xinghualing/1365/2021	WHO Chinese National Influenza Center	WHO Chinese National Influenza Center	Li Xiyan, Liu Jia, Dayan Wang
EPI_ISL_2696045	Asia / China / Fujian	2021-03-22	B/Fujian-Zhangpu/34/2021	WHO Chinese National Influenza Center	WHO Chinese National Influenza Center	Li Xiyan, Liu Jia, Dayan Wang
EPI_ISL_2696046	Asia / China / Fujian	2021-03-22	B/Fujian-Zhangpu/34/2021	WHO Chinese National Influenza Center	WHO Chinese National Influenza Center	Li Xiyan, Liu Jia, Dayan Wang
EPI_ISL_2696047	Asia / China / Hunan	2021-03-23	B/Hunan-Louxin/1228/2021	WHO Chinese National Influenza Center	WHO Chinese National Influenza Center	Li Xiyan, Liu Jia, Dayan Wang
EPI_ISL_2696048	Asia / China / Hunan	2021-03-24	B/Hunan-Yuhu/1245/2021	WHO Chinese National Influenza Center	WHO Chinese National Influenza Center	Li Xiyan, Liu Jia, Dayan Wang
EPI_ISL_2696049	Asia / China / Neimenggu	2021-03-23	B/Neimenggu-Dongsheng/1233/2021	WHO Chinese National Influenza Center	WHO Chinese National Influenza Center	Li Xiyan, Liu Jia, Dayan Wang
EPI_ISL_2696050	Asia / China / Jiangxi	2021-03-25	B/Jiangxi-Xinzhou/5112/2021	WHO Chinese National Influenza Center	WHO Chinese National Influenza Center	Li Xiyan, Liu Jia, Dayan Wang
EPI_ISL_2696051	Asia / China / Chongqing	2021-03-28	B/Chongqing-Qianjiang/1315/2021	WHO Chinese National Influenza Center	WHO Chinese National Influenza Center	Li Xiyan, Liu Jia, Dayan Wang
EPI_ISL_2696052	Asia / China / Shanghai	2021-03-28	B/Shanghai-Jiading/1243/2021	WHO Chinese National Influenza Center	WHO Chinese National Influenza Center	Li Xiyan, Liu Jia, Dayan Wang
EPI_ISL_2696053	Asia / China / Guizhou	2021-03-29	B/Guizhou-Huichuan/1251/2021	WHO Chinese National Influenza Center	WHO Chinese National Influenza Center	Li Xiyan, Liu Jia, Dayan Wang
EPI_ISL_2696054	Asia / China / Guizhou	2021-03-29	B/Guizhou-Huichuan/1251/2021	WHO Chinese National Influenza Center	WHO Chinese National Influenza Center	Li Xiyan, Liu Jia, Dayan Wang
EPI_ISL_2696055	Asia / China / Henan	2021-03-29	B/Henan-Shanyang/37/2021	WHO Chinese National Influenza Center	WHO Chinese National Influenza Center	Li Xiyan, Liu Jia, Dayan Wang
EPI_ISL_2696056	Asia / China / Henan	2021-03-29	B/Henan-Shanyang/37/2021	WHO Chinese National Influenza Center	WHO Chinese National Influenza Center	Li Xiyan, Liu Jia, Dayan Wang
EPI_ISL_2696057	Asia / China / Henan	2021-03-29	B/Henan-Shanyang/311/2021	WHO Chinese National Influenza Center	WHO Chinese National Influenza Center	Li Xiyan, Liu Jia, Dayan Wang
EPI_ISL_2696058	Asia / China / Henan	2021-03-29	B/Henan-Shanyang/311/2021	WHO Chinese National Influenza Center	WHO Chinese National Influenza Center	Li Xiyan, Liu Jia, Dayan Wang
EPI_ISL_2696059	Asia / China / Gansu	2021-03-29	B/Gansu-Xifeng/1247/2021	WHO Chinese National Influenza Center	WHO Chinese National Influenza Center	Li Xiyan, Liu Jia, Dayan Wang
EPI_ISL_2696060	Asia / China / Guangdong	2021-03-29	B/Guangdong-Yuncheng/1502/2021	WHO Chinese National Influenza Center	WHO Chinese National Influenza Center	Li Xiyan, Liu Jia, Dayan Wang
EPI_ISL_2696061	Asia / China / Qinghai	2021-03-29	B/Qinghai-Yushu/1170/2021	WHO Chinese National Influenza Center	WHO Chinese National Influenza Center	Li Xiyan, Liu Jia, Dayan Wang
EPI_ISL_2696063	Asia / China / Hubei	2021-03-29	B/Hubei-Xianan/1387/2021	WHO Chinese National Influenza Center	WHO Chinese National Influenza Center	Li Xiyan, Liu Jia, Dayan Wang
EPI_ISL_2696064	Asia / China / Gansu	2021-03-30	B/Gansu-Baiyin/1245/2021	WHO Chinese National Influenza Center	WHO Chinese National Influenza Center	Li Xiyan, Liu Jia, Dayan Wang
EPI_ISL_2696065	Asia / China / Gansu	2021-03-30	B/Gansu-Jingyuan/1251/2021	WHO Chinese National Influenza Center	WHO Chinese National Influenza Center	Li Xiyan, Liu Jia, Dayan Wang
EPI_ISL_2696066	Asia / China / Henan	2021-03-30	B/Henan-Luolong/1258/2021	WHO Chinese National Influenza Center	WHO Chinese National Influenza Center	Li Xiyan, Liu Jia, Dayan Wang
EPI_ISL_2696067	Asia / China / Hainan	2021-03-17	B/Hainan-Meilan/35/2021	WHO Chinese National Influenza Center	WHO Chinese National Influenza Center	Li Xiyan, Liu Jia, Dayan Wang
EPI_ISL_2696068	Asia / China / Hainan	2021-03-17	B/Hainan-Meilan/314/2021	WHO Chinese National Influenza Center	WHO Chinese National Influenza Center	Li Xiyan, Liu Jia, Dayan Wang
EPI_ISL_2696069	Asia / China / Hainan	2021-03-17	B/Hainan-Meilan/32/2021	WHO Chinese National Influenza Center	WHO Chinese National Influenza Center	Li Xiyan, Liu Jia, Dayan Wang
EPI_ISL_2696070	Asia / China / Guizhou	2021-03-18	B/Guizhou-Xixiu/1218/2021	WHO Chinese National Influenza Center	WHO Chinese National Influenza Center	Li Xiyan, Liu Jia, Dayan Wang
EPI_ISL_2696071	Asia / China / Hubei	2021-03-18	B/Hubei-Xiling/1280/2021	WHO Chinese National Influenza Center	WHO Chinese National Influenza Center	Li Xiyan, Liu Jia, Dayan Wang
EPI_ISL_2696072	Asia / China / Hubei	2021-03-18	B/Hubei-Xiling/1280/2021	WHO Chinese National Influenza Center	WHO Chinese National Influenza Center	Li Xiyan, Liu Jia, Dayan Wang
EPI_ISL_2696073	Asia / China / Hubei	2021-03-18	B/Hubei-Wujiagang/1299/2021	WHO Chinese National Influenza Center	WHO Chinese National Influenza Center	Li Xiyan, Liu Jia, Dayan Wang
EPI_ISL_2696074	Asia / China / Hubei	2021-03-18	B/Hubei-Wujiagang/1299/2021	WHO Chinese National Influenza Center	WHO Chinese National Influenza Center	Li Xiyan, Liu Jia, Dayan Wang
EPI_ISL_2696075	Asia / China	2021-03-19	B/Shaanxi-Zhenan/388/2021	WHO Chinese National Influenza Center	WHO Chinese National Influenza Center	Li Xiyan, Liu Jia, Dayan Wang
EPI_ISL_2696076	Asia / China / Hubei	2021-03-22	B/Hubei-Xianan/1346/2021	WHO Chinese National Influenza Center	WHO Chinese National Influenza Center	Li Xiyan, Liu Jia, Dayan Wang
EPI_ISL_2696077	Asia / China / Jiangxi	2021-03-23	B/Jiangxi-Xinzhou/1288/2021	WHO Chinese National Influenza Center	WHO Chinese National Influenza Center	Li Xiyan, Liu Jia, Dayan Wang
EPI_ISL_2696078	Asia / China / Jiangsu	2021-03-23	B/Jiangsu-Danyang/1230/2021	WHO Chinese National Influenza Center	WHO Chinese National Influenza Center	Li Xiyan, Liu Jia, Dayan Wang
EPI_ISL_2696079	Asia / China / Ningxia	2021-03-23	B/Ningxia-Shapotou/1226/2021	WHO Chinese National Influenza Center	WHO Chinese National Influenza Center	Li Xiyan, Liu Jia, Dayan Wang
EPI_ISL_2696080	Asia / China / Guangxi	2021-03-24	B/Guangxi-Chengzhong/1368/2021	WHO Chinese National Influenza Center	WHO Chinese National Influenza Center	Li Xiyan, Liu Jia, Dayan Wang
EPI_ISL_2696081	Asia / China	2021-03-25	B/Hunan-Tianyuan/348/2021	WHO Chinese National Influenza Center	WHO Chinese National Influenza Center	Li Xiyan, Liu Jia, Dayan Wang
EPI_ISL_2696082	Asia / China / Hunan	2021-03-29	B/Hunan-Tianyuan/1345/2021	WHO Chinese National Influenza Center	WHO Chinese National Influenza Center	Li Xiyan, Liu Jia, Dayan Wang
EPI_ISL_2696083	Asia / China / Jiangxi	2021-03-29	B/Jiangxi-Jizhou/1321/2021	WHO Chinese National Influenza Center	WHO Chinese National Influenza Center	Li Xiyan, Liu Jia, Dayan Wang
EPI_ISL_2696084	Asia / China / Guangdong	2021-03-29	B/Guangdong-Chikan/1261/2021	WHO Chinese National Influenza Center	WHO Chinese National Influenza Center	Li Xiyan, Liu Jia, Dayan Wang
EPI_ISL_2696085	Asia / China / Qinghai	2021-04-01	B/Qinghai-Chengdong/1374/2021	WHO Chinese National Influenza Center	WHO Chinese National Influenza Center	Li Xiyan, Liu Jia, Dayan Wang
EPI_ISL_2696086	Asia / China / Hunan	2021-04-01	B/Hunan-Yuhua/1494/2021	WHO Chinese National Influenza Center	WHO Chinese National Influenza Center	Li Xiyan, Liu Jia, Dayan Wang
EPI_ISL_2696087	Asia / China / Qinghai	2021-04-02	B/Qinghai-Yushu/1158/2021	WHO Chinese National Influenza Center	WHO Chinese National Influenza Center	Li Xiyan, Liu Jia, Dayan Wang
EPI_ISL_2696089	Asia / China / Hunan	2021-04-06	B/Hunan-Wuling/11214/2021	WHO Chinese National Influenza Center	WHO Chinese National Influenza Center	Li Xiyan, Liu Jia, Dayan Wang
EPI_ISL_2696091	Asia / China / Jiangxi	2021-03-01	B/Jiangxi-Xinzhou/1186/2021	WHO Chinese National Influenza Center	WHO Chinese National Influenza Center	Li Xiyan, Liu Jia, Dayan Wang
EPI_ISL_2696092	Asia / China / Guizhou	2021-03-01	B/Guizhou-Huichuan/1175/2021	WHO Chinese National Influenza Center	WHO Chinese National Influenza Center	Li Xiyan, Liu Jia, Dayan Wang
EPI_ISL_2696093	Asia / China / Guizhou	2021-03-08	B/Guizhou-Kaili/1198/2021	WHO Chinese National Influenza Center	WHO Chinese National Influenza Center	Li Xiyan, Liu Jia, Dayan Wang
EPI_ISL_2696094	Asia / China / Gansu	2021-02-22	B/Gansu-Wudou/1184/2021	WHO Chinese National Influenza Center	WHO Chinese National Influenza Center	Li Xiyan, Liu Jia, Dayan Wang
EPI_ISL_2696095	Asia / China / Gansu	2021-02-22	B/Gansu-Wudou/1183/2021	WHO Chinese National Influenza Center	WHO Chinese National Influenza Center	Li Xiyan, Liu Jia, Dayan Wang
EPI_ISL_2696096	Asia / China / Zhejiang	2021-02-13	B/Zhejiang-Yuecheng/1279/2021	WHO Chinese National Influenza Center	WHO Chinese National Influenza Center	Li Xiyan, Liu Jia, Dayan Wang
EPI_ISL_2696097	Asia / China / Shandong	2021-02-04	B/Shandong-Tianqiao/179/2021	WHO Chinese National Influenza Center	WHO Chinese National Influenza Center	Li Xiyan, Liu Jia, Dayan Wang
EPI_ISL_2696098	Asia / China / Jiangxi	2021-02-08	B/Jiangxi-Anyuan/1122/2021	WHO Chinese National Influenza Center	WHO Chinese National Influenza Center	Li Xiyan, Liu Jia, Dayan Wang
EPI_ISL_2696099	Asia / China / Jiangxi	2021-03-03	B/Jiangxi-Xihu/1218/2021	WHO Chinese National Influenza Center	WHO Chinese National Influenza Center	Li Xiyan, Liu Jia, Dayan Wang
EPI_ISL_2696100	Asia / China / Jiangxi	2021-03-01	B/Jiangxi-Xinzhou/1186/2021	WHO Chinese National Influenza Center	WHO Chinese National Influenza Center	Li Xiyan, Liu Jia, Dayan Wang
EPI_ISL_2696101	Asia / China / Jiangxi	2021-03-01	B/Jiangxi-Xinzhou/1178/2021	WHO Chinese National Influenza Center	WHO Chinese National Influenza Center	Li Xiyan, Liu Jia, Dayan Wang
EPI_ISL_2696102	Asia / China / Jiangxi	2021-02-21	B/Jiangxi-Xinzhou/1157/2021	WHO Chinese National Influenza Center	WHO Chinese National Influenza Center	Li Xiyan, Liu Jia, Dayan Wang
EPI_ISL_2696103	Asia / China / Jiangxi	2021-02-23	B/Jiangxi-Yuehu/1206/2021	WHO Chinese National Influenza Center	WHO Chinese National Influenza Center	Li Xiyan, Liu Jia, Dayan Wang
EPI_ISL_2696104	Asia / China / Jiangxi	2021-03-01	B/Jiangxi-Guixi/1225/2021	WHO Chinese National Influenza Center	WHO Chinese National Influenza Center	Li Xiyan, Liu Jia, Dayan Wang
EPI_ISL_2696105	Asia / China / Jiangxi	2021-03-01	B/Jiangxi-Guixi/1212/2021	WHO Chinese National Influenza Center	WHO Chinese National Influenza Center	Li Xiyan, Liu Jia, Dayan Wang
EPI_ISL_2696107	Asia / China / Jiangxi	2021-02-26	B/Jiangxi-Zhushan/1161/2021	WHO Chinese National Influenza Center	WHO Chinese National Influenza Center	Li Xiyan, Liu Jia, Dayan Wang
EPI_ISL_2696108	Asia / China / Jiangxi	2021-02-20	B/Jiangxi-Linchuan/1164/2021	WHO Chinese National Influenza Center	WHO Chinese National Influenza Center	Li Xiyan, Liu Jia, Dayan Wang
EPI_ISL_2696109	Asia / China / Jiangxi	2021-03-03	B/Jiangxi-Xihu/1218/2021	WHO Chinese National Influenza Center	WHO Chinese National Influenza Center	Li Xiyan, Liu Jia, Dayan Wang
EPI_ISL_2696110	Asia / China / Jiangxi	2021-02-26	B/Jiangxi-Zhushan/1161/2021	WHO Chinese National Influenza Center	WHO Chinese National Influenza Center	Li Xiyan, Liu Jia, Dayan Wang
EPI_ISL_2696111	Asia / China / Jiangxi	2021-02-06	B/Jiangxi-Zhushan/1104/2021	WHO Chinese National Influenza Center	WHO Chinese National Influenza Center	Li Xiyan, Liu Jia, Dayan Wang
EPI_ISL_2696112	Asia / China / Jiangxi	2021-02-28	B/Jiangxi-Linchuan/1197/2021	WHO Chinese National Influenza Center	WHO Chinese National Influenza Center	Li Xiyan, Liu Jia, Dayan Wang
EPI_ISL_2696113	Asia / China / Jiangxi	2021-02-17	B/Jiangxi-Donghu/1293/2021	WHO Chinese National Influenza Center	WHO Chinese National Influenza Center	Li Xiyan, Liu Jia, Dayan Wang
EPI_ISL_2696114	Asia / China / Jiangxi	2021-02-04	B/Jiangxi-Donghu/1201/2021	WHO Chinese National Influenza Center	WHO Chinese National Influenza Center	Li Xiyan, Liu Jia, Dayan Wang
EPI_ISL_2696115	Asia / China / Jiangxi	2021-02-03	B/Jiangxi-Donghu/1199/2021	WHO Chinese National Influenza Center	WHO Chinese National Influenza Center	Li Xiyan, Liu Jia, Dayan Wang
EPI_ISL_2696116	Asia / China / Jiangxi	2021-03-01	B/Jiangxi-Yuanzhou/1434/2021	WHO Chinese National Influenza Center	WHO Chinese National Influenza Center	Li Xiyan, Liu Jia, Dayan Wang
EPI_ISL_2696117	Asia / China	2021-02-01	B/Guangdong-Dongwanbendi/545/2021	WHO Chinese National Influenza Center	WHO Chinese National Influenza Center	Li Xiyan, Liu Jia, Dayan Wang
EPI_ISL_2696118	Asia / China	2021-02-01	B/Guangdong-Dongwanbendi/545/2021	WHO Chinese National Influenza Center	WHO Chinese National Influenza Center	Li Xiyan, Liu Jia, Dayan Wang
EPI_ISL_2696119	Asia / China / Heilongjiang	2020-11-10	B/Heilongjiang-Hailin/1508/2020	WHO Chinese National Influenza Center	WHO Chinese National Influenza Center	Li Xiyan, Liu Jia, Dayan Wang
EPI_ISL_2696120	Asia / China	2021-01-15	B/Guangxi-Hengxian/39/2021	WHO Chinese National Influenza Center	WHO Chinese National Influenza Center	Li Xiyan, Liu Jia, Dayan Wang
EPI_ISL_2696121	Asia / China / Henan	2021-01-18	B/Henan-Luolong/156/2021	WHO Chinese National Influenza Center	WHO Chinese National Influenza Center	Li Xiyan, Liu Jia, Dayan Wang
EPI_ISL_2696122	Asia / China	2021-01-25	B/Henan-Jinshui/166/2021	WHO Chinese National Influenza Center	WHO Chinese National Influenza Center	Li Xiyan, Liu Jia, Dayan Wang
EPI_ISL_2696123	Asia / China / Hunan	2021-01-18	B/Hunan-Tianyuan/196/2021	WHO Chinese National Influenza Center	WHO Chinese National Influenza Center	Li Xiyan, Liu Jia, Dayan Wang
EPI_ISL_2696124	Asia / China	2021-02-03	B/Hubei-Xianan/545/2021	WHO Chinese National Influenza Center	WHO Chinese National Influenza Center	Li Xiyan, Liu Jia, Dayan Wang
EPI_ISL_2696125	Asia / China / Zhejiang	2021-02-01	B/Zhejiang-Yiwu/1104/2021	WHO Chinese National Influenza Center	WHO Chinese National Influenza Center	Li Xiyan, Liu Jia, Dayan Wang
EPI_ISL_2696126	Asia / China / Zhejiang	2021-02-01	B/Zhejiang-Yiwu/1101/2021	WHO Chinese National Influenza Center	WHO Chinese National Influenza Center	Li Xiyan, Liu Jia, Dayan Wang
EPI_ISL_2696127	Asia / China / Hunan	2021-01-25	B/Hunan-Tianyuan/1124/2021	WHO Chinese National Influenza Center	WHO Chinese National Influenza Center	Li Xiyan, Liu Jia, Dayan Wang
EPI_ISL_2696128	Asia / China / Hunan	2021-01-25	B/Hunan-Tianyuan/199/2021	WHO Chinese National Influenza Center	WHO Chinese National Influenza Center	Li Xiyan, Liu Jia, Dayan Wang
EPI_ISL_2696129	Asia / China / Jiangxi	2021-02-02	B/Jiangxi-Yushui/1133/2021	WHO Chinese National Influenza Center	WHO Chinese National Influenza Center	Li Xiyan, Liu Jia, Dayan Wang
EPI_ISL_2696130	Asia / China / Jiangxi	2021-02-02	B/Jiangxi-Yushui/1132/2021	WHO Chinese National Influenza Center	WHO Chinese National Influenza Center	Li Xiyan, Liu Jia, Dayan Wang
EPI_ISL_2696131	Asia / China / Jiangxi	2021-02-01	B/Jiangxi-Yushui/1128/2021	WHO Chinese National Influenza Center	WHO Chinese National Influenza Center	Li Xiyan, Liu Jia, Dayan Wang
EPI_ISL_2696132	Asia / China / Jiangxi	2021-02-01	B/Jiangxi-Yushui/1122/2021	WHO Chinese National Influenza Center	WHO Chinese National Influenza Center	Li Xiyan, Liu Jia, Dayan Wang
EPI_ISL_2696133	Asia / China / Jiangxi	2021-02-01	B/Jiangxi-Yushui/1121/2021	WHO Chinese National Influenza Center	WHO Chinese National Influenza Center	Li Xiyan, Liu Jia, Dayan Wang
EPI_ISL_2696134	Asia / China / Jiangxi	2021-02-01	B/Jiangxi-Yushui/1116/2021	WHO Chinese National Influenza Center	WHO Chinese National Influenza Center	Li Xiyan, Liu Jia, Dayan Wang
EPI_ISL_2696135	Asia / China / Hunan	2021-02-01	B/Hunan-Tianyuan/1130/2021	WHO Chinese National Influenza Center	WHO Chinese National Influenza Center	Li Xiyan, Liu Jia, Dayan Wang
EPI_ISL_2696136	Asia / China / Gansu	2021-02-22	B/Gansu-Wudou/1184/2021	WHO Chinese National Influenza Center	WHO Chinese National Influenza Center	Li Xiyan, Liu Jia, Dayan Wang
EPI_ISL_2696137	Asia / China / Gansu	2021-02-22	B/Gansu-Wudou/1183/2021	WHO Chinese National Influenza Center	WHO Chinese National Influenza Center	Li Xiyan, Liu Jia, Dayan Wang
EPI_ISL_2696138	Asia / China / Heilongjiang	2021-01-19	B/Heilongjiang-Aimin/150/2021	WHO Chinese National Influenza Center	WHO Chinese National Influenza Center	Li Xiyan, Liu Jia, Dayan Wang
EPI_ISL_2696139	Asia / China / Hubei	2021-02-18	B/Hubei-Echeng/1322/2021	WHO Chinese National Influenza Center	WHO Chinese National Influenza Center	Li Xiyan, Liu Jia, Dayan Wang
EPI_ISL_2696140	Asia / China / Hubei	2021-02-18	B/Hubei-Echeng/1322/2021	WHO Chinese National Influenza Center	WHO Chinese National Influenza Center	Li Xiyan, Liu Jia, Dayan Wang
EPI_ISL_2696141	Asia / China	2021-02-03	B/Hubei-Xianan/545/2021	WHO Chinese National Influenza Center	WHO Chinese National Influenza Center	Li Xiyan, Liu Jia, Dayan Wang
EPI_ISL_2696142	Asia / China / Hubei	2021-02-20	B/Hubei-Xianan/1164/2021	WHO Chinese National Influenza Center	WHO Chinese National Influenza Center	Li Xiyan, Liu Jia, Dayan Wang
EPI_ISL_2696143	Asia / China / Zhejiang	2021-02-24	B/Zhejiang-Nanhu/1177/2021	WHO Chinese National Influenza Center	WHO Chinese National Influenza Center	Li Xiyan, Liu Jia, Dayan Wang
EPI_ISL_2696144	Asia / China / Zhejiang	2021-02-09	B/Zhejiang-Nanhu/1126/2021	WHO Chinese National Influenza Center	WHO Chinese National Influenza Center	Li Xiyan, Liu Jia, Dayan Wang
EPI_ISL_2696145	Asia / China / Henan	2021-02-17	B/Henan-Luolong/1122/2021	WHO Chinese National Influenza Center	WHO Chinese National Influenza Center	Li Xiyan, Liu Jia, Dayan Wang
EPI_ISL_2696146	Asia / China / Henan	2021-02-17	B/Henan-Luolong/1122/2021	WHO Chinese National Influenza Center	WHO Chinese National Influenza Center	Li Xiyan, Liu Jia, Dayan Wang
EPI_ISL_2696147	Asia / China / Henan	2021-02-17	B/Henan-Xigong/1118/2021	WHO Chinese National Influenza Center	WHO Chinese National Influenza Center	Li Xiyan, Liu Jia, Dayan Wang
EPI_ISL_2696148	Asia / China / Henan	2021-02-17	B/Henan-Xigong/1118/2021	WHO Chinese National Influenza Center	WHO Chinese National Influenza Center	Li Xiyan, Liu Jia, Dayan Wang
EPI_ISL_2696149	Asia / China / Hubei	2021-01-31	B/Hubei-Dongxihu/217/2021	WHO Chinese National Influenza Center	WHO Chinese National Influenza Center	Li Xiyan, Liu Jia, Dayan Wang
EPI_ISL_2696150	Asia / China / Hubei	2021-02-22	B/Hubei-Xianan/1174/2021	WHO Chinese National Influenza Center	WHO Chinese National Influenza Center	Li Xiyan, Liu Jia, Dayan Wang
EPI_ISL_2696151	Asia / China / Hubei	2021-02-21	B/Hubei-Xianan/1167/2021	WHO Chinese National Influenza Center	WHO Chinese National Influenza Center	Li Xiyan, Liu Jia, Dayan Wang
EPI_ISL_2696152	Asia / China / Hubei	2021-02-20	B/Hubei-Xianan/1164/2021	WHO Chinese National Influenza Center	WHO Chinese National Influenza Center	Li Xiyan, Liu Jia, Dayan Wang
EPI_ISL_2696153	Asia / China / Henan	2021-02-02	B/Henan-Luolong/187/2021	WHO Chinese National Influenza Center	WHO Chinese National Influenza Center	Li Xiyan, Liu Jia, Dayan Wang
EPI_ISL_2696154	Asia / China	2021-02-03	B/Shandong-Ningjin/310/2021	WHO Chinese National Influenza Center	WHO Chinese National Influenza Center	Li Xiyan, Liu Jia, Dayan Wang
EPI_ISL_2696155	Asia / China	2021-02-03	B/Shandong-Ningjin/310/2021	WHO Chinese National Influenza Center	WHO Chinese National Influenza Center	Li Xiyan, Liu Jia, Dayan Wang
EPI_ISL_2696156	Asia / China	2021-02-01	B/Shandong-Ningjin/33/2021	WHO Chinese National Influenza Center	WHO Chinese National Influenza Center	Li Xiyan, Liu Jia, Dayan Wang
EPI_ISL_2696157	Asia / China	2021-02-01	B/Shandong-Ningjin/33/2021	WHO Chinese National Influenza Center	WHO Chinese National Influenza Center	Li Xiyan, Liu Jia, Dayan Wang
EPI_ISL_2696158	Asia / China	2021-02-01	B/Shandong-Ningjin/32/2021	WHO Chinese National Influenza Center	WHO Chinese National Influenza Center	Li Xiyan, Liu Jia, Dayan Wang
EPI_ISL_2696159	Asia / China	2021-02-01	B/Shandong-Ningjin/32/2021	WHO Chinese National Influenza Center	WHO Chinese National Influenza Center	Li Xiyan, Liu Jia, Dayan Wang
EPI_ISL_2696160	Asia / China	2021-02-01	B/Shandong-Ningjin/31/2021	WHO Chinese National Influenza Center	WHO Chinese National Influenza Center	Li Xiyan, Liu Jia, Dayan Wang
EPI_ISL_2696161	Asia / China	2021-02-01	B/Shandong-Ningjin/31/2021	WHO Chinese National Influenza Center	WHO Chinese National Influenza Center	Li Xiyan, Liu Jia, Dayan Wang
EPI_ISL_2696162	Asia / China / Guizhou	2021-01-27	B/Guizhou-Douyun/1104/2021	WHO Chinese National Influenza Center	WHO Chinese National Influenza Center	Li Xiyan, Liu Jia, Dayan Wang
EPI_ISL_2696163	Asia / China / Guizhou	2021-01-25	B/Guizhou-Douyun/198/2021	WHO Chinese National Influenza Center	WHO Chinese National Influenza Center	Li Xiyan, Liu Jia, Dayan Wang
EPI_ISL_2696164	Asia / China / Fujian	2021-02-15	B/Fujian-Sanyuan/2218/2021	WHO Chinese National Influenza Center	WHO Chinese National Influenza Center	Li Xiyan, Liu Jia, Dayan Wang
EPI_ISL_2696165	Asia / China / Fujian	2021-02-09	B/Fujian-Sanyuan/2205/2021	WHO Chinese National Influenza Center	WHO Chinese National Influenza Center	Li Xiyan, Liu Jia, Dayan Wang
EPI_ISL_2696166	Asia / China / Fujian	2021-02-07	B/Fujian-Meilie/1145/2021	WHO Chinese National Influenza Center	WHO Chinese National Influenza Center	Li Xiyan, Liu Jia, Dayan Wang
EPI_ISL_2696167	Asia / China / Fujian	2021-02-01	B/Fujian-Meilie/1124/2021	WHO Chinese National Influenza Center	WHO Chinese National Influenza Center	Li Xiyan, Liu Jia, Dayan Wang
EPI_ISL_2696168	Asia / China / Fujian	2021-02-01	B/Fujian-Meilie/1103/2021	WHO Chinese National Influenza Center	WHO Chinese National Influenza Center	Li Xiyan, Liu Jia, Dayan Wang
EPI_ISL_2696169	Asia / China / Zhejiang	2021-02-02	B/Zhejiang-Kecheng/1128/2021	WHO Chinese National Influenza Center	WHO Chinese National Influenza Center	Li Xiyan, Liu Jia, Dayan Wang
EPI_ISL_2696170	Asia / China / Zhejiang	2021-02-01	B/Zhejiang-Kecheng/1113/2021	WHO Chinese National Influenza Center	WHO Chinese National Influenza Center	Li Xiyan, Liu Jia, Dayan Wang
EPI_ISL_2696171	Asia / China / Zhejiang	2021-01-15	B/Zhejiang-Yuecheng/313/2021	WHO Chinese National Influenza Center	WHO Chinese National Influenza Center	Li Xiyan, Liu Jia, Dayan Wang
EPI_ISL_2696172	Asia / China / Zhejiang	2021-01-15	B/Zhejiang-Yuecheng/311/2021	WHO Chinese National Influenza Center	WHO Chinese National Influenza Center	Li Xiyan, Liu Jia, Dayan Wang
EPI_ISL_2696173	Asia / China / Hunan	2021-01-19	B/Hunan-Tongdaodongzuzizhi/36/2021	WHO Chinese National Influenza Center	WHO Chinese National Influenza Center	Li Xiyan, Liu Jia, Dayan Wang
EPI_ISL_2696174	Asia / China / Hunan	2021-01-19	B/Hunan-Tongdaodongzuzizhi/35/2021	WHO Chinese National Influenza Center	WHO Chinese National Influenza Center	Li Xiyan, Liu Jia, Dayan Wang
EPI_ISL_2696175	Asia / China / Hunan	2021-01-19	B/Hunan-Tongdaodongzuzizhi/34/2021	WHO Chinese National Influenza Center	WHO Chinese National Influenza Center	Li Xiyan, Liu Jia, Dayan Wang
EPI_ISL_2696176	Asia / China / Hunan	2021-01-19	B/Hunan-Tongdaodongzuzizhi/33/2021	WHO Chinese National Influenza Center	WHO Chinese National Influenza Center	Li Xiyan, Liu Jia, Dayan Wang
EPI_ISL_2696177	Asia / China / Hunan	2021-01-19	B/Hunan-Tongdaodongzuzizhi/32/2021	WHO Chinese National Influenza Center	WHO Chinese National Influenza Center	Li Xiyan, Liu Jia, Dayan Wang
EPI_ISL_2696178	Asia / China / Hunan	2021-02-02	B/Hunan-Yuhua/1170/2021	WHO Chinese National Influenza Center	WHO Chinese National Influenza Center	Li Xiyan, Liu Jia, Dayan Wang
EPI_ISL_2696179	Asia / China / Hunan	2021-02-02	B/Hunan-Yuhua/1170/2021	WHO Chinese National Influenza Center	WHO Chinese National Influenza Center	Li Xiyan, Liu Jia, Dayan Wang
EPI_ISL_2696180	Asia / China / Hunan	2021-01-25	B/Hunan-Kaifu/162/2021	WHO Chinese National Influenza Center	WHO Chinese National Influenza Center	Li Xiyan, Liu Jia, Dayan Wang
EPI_ISL_2696181	Asia / China	2021-01-25	B/Henan-Luolong/174/2021	WHO Chinese National Influenza Center	WHO Chinese National Influenza Center	Li Xiyan, Liu Jia, Dayan Wang
EPI_ISL_2696182	Asia / China	2021-01-25	B/Henan-Luolong/169/2021	WHO Chinese National Influenza Center	WHO Chinese National Influenza Center	Li Xiyan, Liu Jia, Dayan Wang
EPI_ISL_2696183	Asia / China	2021-02-07	B/Henan-Zhongyuan/1112/2021	WHO Chinese National Influenza Center	WHO Chinese National Influenza Center	Li Xiyan, Liu Jia, Dayan Wang
EPI_ISL_2696184	Asia / China / Hunan	2021-01-18	B/Hunan-Yuhua/194/2021	WHO Chinese National Influenza Center	WHO Chinese National Influenza Center	Li Xiyan, Liu Jia, Dayan Wang
EPI_ISL_2696185	Asia / China / Hunan	2021-01-18	B/Hunan-Yuhua/194/2021	WHO Chinese National Influenza Center	WHO Chinese National Influenza Center	Li Xiyan, Liu Jia, Dayan Wang
EPI_ISL_2696186	Asia / China / Guizhou	2021-01-04	B/Guizhou-Kaili/17/2021	WHO Chinese National Influenza Center	WHO Chinese National Influenza Center	Li Xiyan, Liu Jia, Dayan Wang
EPI_ISL_2696187	Asia / China / Guizhou	2021-01-04	B/Guizhou-Kaili/13/2021	WHO Chinese National Influenza Center	WHO Chinese National Influenza Center	Li Xiyan, Liu Jia, Dayan Wang
EPI_ISL_2696188	Asia / China / Hubei	2021-01-25	B/Hubei-Xianan/180/2021	WHO Chinese National Influenza Center	WHO Chinese National Influenza Center	Li Xiyan, Liu Jia, Dayan Wang
EPI_ISL_2696189	Asia / China / Guizhou	2021-01-11	B/Guizhou-Douyun/137/2021	WHO Chinese National Influenza Center	WHO Chinese National Influenza Center	Li Xiyan, Liu Jia, Dayan Wang
EPI_ISL_2696190	Asia / China / Hunan	2021-01-25	B/Hunan-Kaifu/162/2021	WHO Chinese National Influenza Center	WHO Chinese National Influenza Center	Li Xiyan, Liu Jia, Dayan Wang
EPI_ISL_2696191	Asia / China / Hunan	2021-01-12	B/Hunan-Kaifu/126/2021	WHO Chinese National Influenza Center	WHO Chinese National Influenza Center	Li Xiyan, Liu Jia, Dayan Wang
EPI_ISL_2696192	Asia / China / Hunan	2021-01-12	B/Hunan-Kaifu/126/2021	WHO Chinese National Influenza Center	WHO Chinese National Influenza Center	Li Xiyan, Liu Jia, Dayan Wang
EPI_ISL_2696193	Asia / China / Jiangxi	2021-01-21	B/Jiangxi-Zhanggong/328/2021	WHO Chinese National Influenza Center	WHO Chinese National Influenza Center	Li Xiyan, Liu Jia, Dayan Wang
EPI_ISL_2696194	Asia / China / Jiangxi	2021-01-21	B/Jiangxi-Zhanggong/327/2021	WHO Chinese National Influenza Center	WHO Chinese National Influenza Center	Li Xiyan, Liu Jia, Dayan Wang
EPI_ISL_2696195	Asia / China / Jiangxi	2021-01-21	B/Jiangxi-Zhanggong/326/2021	WHO Chinese National Influenza Center	WHO Chinese National Influenza Center	Li Xiyan, Liu Jia, Dayan Wang
EPI_ISL_2696196	Asia / China / Jiangxi	2021-01-21	B/Jiangxi-Zhanggong/325/2021	WHO Chinese National Influenza Center	WHO Chinese National Influenza Center	Li Xiyan, Liu Jia, Dayan Wang
EPI_ISL_2696197	Asia / China / Jiangxi	2021-01-21	B/Jiangxi-Zhanggong/323/2021	WHO Chinese National Influenza Center	WHO Chinese National Influenza Center	Li Xiyan, Liu Jia, Dayan Wang
EPI_ISL_2696198	Asia / China / Jiangxi	2021-01-21	B/Jiangxi-Zhanggong/322/2021	WHO Chinese National Influenza Center	WHO Chinese National Influenza Center	Li Xiyan, Liu Jia, Dayan Wang
EPI_ISL_2696199	Asia / China / Jiangxi	2021-01-14	B/Jiangxi-Zhanggong/319/2021	WHO Chinese National Influenza Center	WHO Chinese National Influenza Center	Li Xiyan, Liu Jia, Dayan Wang
EPI_ISL_2696200	Asia / China / Jiangxi	2021-01-20	B/Jiangxi-Xihu/1106/2021	WHO Chinese National Influenza Center	WHO Chinese National Influenza Center	Li Xiyan, Liu Jia, Dayan Wang
EPI_ISL_2696201	Asia / China / Jiangxi	2021-01-20	B/Jiangxi-Xihu/182/2021	WHO Chinese National Influenza Center	WHO Chinese National Influenza Center	Li Xiyan, Liu Jia, Dayan Wang
EPI_ISL_2696203	Asia / China / Jiangxi	2021-01-18	B/Jiangxi-Jizhou/190/2021	WHO Chinese National Influenza Center	WHO Chinese National Influenza Center	Li Xiyan, Liu Jia, Dayan Wang
EPI_ISL_2696204	Asia / China / Jiangxi	2021-01-18	B/Jiangxi-Jizhou/180/2021	WHO Chinese National Influenza Center	WHO Chinese National Influenza Center	Li Xiyan, Liu Jia, Dayan Wang
EPI_ISL_2696205	Asia / China / Jiangxi	2021-01-18	B/Jiangxi-Jizhou/170/2021	WHO Chinese National Influenza Center	WHO Chinese National Influenza Center	Li Xiyan, Liu Jia, Dayan Wang
EPI_ISL_2696206	Asia / China / Jiangxi	2021-01-18	B/Jiangxi-Jizhou/167/2021	WHO Chinese National Influenza Center	WHO Chinese National Influenza Center	Li Xiyan, Liu Jia, Dayan Wang
EPI_ISL_2696207	Asia / China / Jiangxi	2021-01-13	B/Jiangxi-Jizhou/150/2021	WHO Chinese National Influenza Center	WHO Chinese National Influenza Center	Li Xiyan, Liu Jia, Dayan Wang
EPI_ISL_2696208	Asia / China / Jiangxi	2021-01-12	B/Jiangxi-Jizhou/146/2021	WHO Chinese National Influenza Center	WHO Chinese National Influenza Center	Li Xiyan, Liu Jia, Dayan Wang
EPI_ISL_2696209	Asia / China / Jiangxi	2021-01-21	B/Jiangxi-Zhanggong/330/2021	WHO Chinese National Influenza Center	WHO Chinese National Influenza Center	Li Xiyan, Liu Jia, Dayan Wang
EPI_ISL_2696210	Asia / China / Jiangxi	2021-01-21	B/Jiangxi-Zhanggong/324/2021	WHO Chinese National Influenza Center	WHO Chinese National Influenza Center	Li Xiyan, Liu Jia, Dayan Wang
EPI_ISL_2696211	Asia / China / Jiangxi	2021-01-28	B/Jiangxi-Donghu/1168/2021	WHO Chinese National Influenza Center	WHO Chinese National Influenza Center	Li Xiyan, Liu Jia, Dayan Wang
EPI_ISL_2696212	Asia / China / Jiangxi	2021-01-28	B/Jiangxi-Donghu/1172/2021	WHO Chinese National Influenza Center	WHO Chinese National Influenza Center	Li Xiyan, Liu Jia, Dayan Wang
EPI_ISL_2696213	Asia / China / Jiangxi	2021-01-28	B/Jiangxi-Donghu/1166/2021	WHO Chinese National Influenza Center	WHO Chinese National Influenza Center	Li Xiyan, Liu Jia, Dayan Wang
EPI_ISL_2696214	Asia / China / Jiangxi	2021-01-28	B/Jiangxi-Donghu/1164/2021	WHO Chinese National Influenza Center	WHO Chinese National Influenza Center	Li Xiyan, Liu Jia, Dayan Wang
EPI_ISL_2696215	Asia / China / Jiangxi	2021-01-28	B/Jiangxi-Donghu/1165/2021	WHO Chinese National Influenza Center	WHO Chinese National Influenza Center	Li Xiyan, Liu Jia, Dayan Wang
EPI_ISL_2696216	Asia / China / Jiangxi	2021-01-28	B/Jiangxi-Donghu/1162/2021	WHO Chinese National Influenza Center	WHO Chinese National Influenza Center	Li Xiyan, Liu Jia, Dayan Wang
EPI_ISL_2696217	Asia / China / Jiangxi	2021-01-28	B/Jiangxi-Donghu/1159/2021	WHO Chinese National Influenza Center	WHO Chinese National Influenza Center	Li Xiyan, Liu Jia, Dayan Wang
EPI_ISL_2696218	Asia / China / Jiangxi	2021-01-19	B/Jiangxi-Donghu/1135/2021	WHO Chinese National Influenza Center	WHO Chinese National Influenza Center	Li Xiyan, Liu Jia, Dayan Wang
EPI_ISL_2696219	Asia / China / Jiangxi	2021-01-19	B/Jiangxi-Donghu/1119/2021	WHO Chinese National Influenza Center	WHO Chinese National Influenza Center	Li Xiyan, Liu Jia, Dayan Wang
EPI_ISL_2696220	Asia / China / Guizhou	2021-01-11	B/Guizhou-Douyun/142/2021	WHO Chinese National Influenza Center	WHO Chinese National Influenza Center	Li Xiyan, Liu Jia, Dayan Wang
EPI_ISL_2696221	Asia / China / Guizhou	2021-01-11	B/Guizhou-Douyun/141/2021	WHO Chinese National Influenza Center	WHO Chinese National Influenza Center	Li Xiyan, Liu Jia, Dayan Wang
EPI_ISL_2696222	Asia / China / Guizhou	2021-01-11	B/Guizhou-Douyun/138/2021	WHO Chinese National Influenza Center	WHO Chinese National Influenza Center	Li Xiyan, Liu Jia, Dayan Wang
EPI_ISL_2696223	Asia / China / Guizhou	2021-01-05	B/Guizhou-Douyun/112/2021	WHO Chinese National Influenza Center	WHO Chinese National Influenza Center	Li Xiyan, Liu Jia, Dayan Wang
EPI_ISL_2696224	Asia / China / Guizhou	2021-01-05	B/Guizhou-Douyun/120/2021	WHO Chinese National Influenza Center	WHO Chinese National Influenza Center	Li Xiyan, Liu Jia, Dayan Wang
EPI_ISL_2696225	Asia / China / Guizhou	2021-01-05	B/Guizhou-Douyun/110/2021	WHO Chinese National Influenza Center	WHO Chinese National Influenza Center	Li Xiyan, Liu Jia, Dayan Wang
EPI_ISL_2696226	Asia / China	2021-01-16	B/Hubei-Qiaokou/223/2021	WHO Chinese National Influenza Center	WHO Chinese National Influenza Center	Li Xiyan, Liu Jia, Dayan Wang
EPI_ISL_2696227	Asia / China / Hubei	2021-01-21	B/Hubei-Wujiagang/185/2021	WHO Chinese National Influenza Center	WHO Chinese National Influenza Center	Li Xiyan, Liu Jia, Dayan Wang
EPI_ISL_2696229	Asia / China / Jiangxi	2021-01-04	B/Jiangxi-Zhanggong/15/2021	WHO Chinese National Influenza Center	WHO Chinese National Influenza Center	Li Xiyan, Liu Jia, Dayan Wang
EPI_ISL_2696230	Asia / China	2021-01-16	B/Hubei-Qiaokou/223/2021	WHO Chinese National Influenza Center	WHO Chinese National Influenza Center	Li Xiyan, Liu Jia, Dayan Wang
EPI_ISL_2696231	Asia / China / Hubei	2021-01-21	B/Hubei-Wujiagang/185/2021	WHO Chinese National Influenza Center	WHO Chinese National Influenza Center	Li Xiyan, Liu Jia, Dayan Wang
EPI_ISL_2696232	Asia / China / Guizhou	2021-01-18	B/Guizhou-Douyun/163/2021	WHO Chinese National Influenza Center	WHO Chinese National Influenza Center	Li Xiyan, Liu Jia, Dayan Wang
EPI_ISL_2696233	Asia / China / Guizhou	2021-01-18	B/Guizhou-Douyun/170/2021	WHO Chinese National Influenza Center	WHO Chinese National Influenza Center	Li Xiyan, Liu Jia, Dayan Wang
EPI_ISL_2696234	Asia / China / Guizhou	2021-01-19	B/Guizhou-Douyun/174/2021	WHO Chinese National Influenza Center	WHO Chinese National Influenza Center	Li Xiyan, Liu Jia, Dayan Wang
EPI_ISL_2696235	Asia / China / Guizhou	2021-01-19	B/Guizhou-Douyun/175/2021	WHO Chinese National Influenza Center	WHO Chinese National Influenza Center	Li Xiyan, Liu Jia, Dayan Wang
EPI_ISL_2696236	Asia / China / Guizhou	2021-01-19	B/Guizhou-Douyun/179/2021	WHO Chinese National Influenza Center	WHO Chinese National Influenza Center	Li Xiyan, Liu Jia, Dayan Wang
EPI_ISL_2696237	Asia / China / Guizhou	2021-01-05	B/Guizhou-Douyun/122/2021	WHO Chinese National Influenza Center	WHO Chinese National Influenza Center	Li Xiyan, Liu Jia, Dayan Wang
EPI_ISL_2696238	Asia / China / Guizhou	2021-01-11	B/Guizhou-Douyun/138/2021	WHO Chinese National Influenza Center	WHO Chinese National Influenza Center	Li Xiyan, Liu Jia, Dayan Wang
EPI_ISL_2696239	Asia / China / Guizhou	2021-01-11	B/Guizhou-Douyun/143/2021	WHO Chinese National Influenza Center	WHO Chinese National Influenza Center	Li Xiyan, Liu Jia, Dayan Wang
EPI_ISL_2696240	Asia / China / Guizhou	2021-01-12	B/Guizhou-Douyun/151/2021	WHO Chinese National Influenza Center	WHO Chinese National Influenza Center	Li Xiyan, Liu Jia, Dayan Wang
EPI_ISL_2696241	Asia / China / Guizhou	2021-01-12	B/Guizhou-Douyun/152/2021	WHO Chinese National Influenza Center	WHO Chinese National Influenza Center	Li Xiyan, Liu Jia, Dayan Wang
EPI_ISL_2696242	Asia / China / Guizhou	2021-01-12	B/Guizhou-Douyun/153/2021	WHO Chinese National Influenza Center	WHO Chinese National Influenza Center	Li Xiyan, Liu Jia, Dayan Wang
EPI_ISL_2696243	Asia / China / Guizhou	2021-01-12	B/Guizhou-Douyun/155/2021	WHO Chinese National Influenza Center	WHO Chinese National Influenza Center	Li Xiyan, Liu Jia, Dayan Wang
EPI_ISL_2696244	Asia / China / Guizhou	2021-01-12	B/Guizhou-Douyun/157/2021	WHO Chinese National Influenza Center	WHO Chinese National Influenza Center	Li Xiyan, Liu Jia, Dayan Wang
EPI_ISL_2696245	Asia / China / Guizhou	2021-01-12	B/Guizhou-Douyun/158/2021	WHO Chinese National Influenza Center	WHO Chinese National Influenza Center	Li Xiyan, Liu Jia, Dayan Wang
EPI_ISL_2696246	Asia / China / Guizhou	2021-01-18	B/Guizhou-Douyun/165/2021	WHO Chinese National Influenza Center	WHO Chinese National Influenza Center	Li Xiyan, Liu Jia, Dayan Wang
EPI_ISL_2696247	Asia / China / Guizhou	2021-01-18	B/Guizhou-Douyun/164/2021	WHO Chinese National Influenza Center	WHO Chinese National Influenza Center	Li Xiyan, Liu Jia, Dayan Wang
EPI_ISL_2696248	Asia / China / Shanghai	2021-01-06	B/Shanghai-Minxing/118/2021	WHO Chinese National Influenza Center	WHO Chinese National Influenza Center	Li Xiyan, Liu Jia, Dayan Wang
EPI_ISL_2696249	Asia / China / Shanghai	2021-01-10	B/Shanghai-Minxing/122/2021	WHO Chinese National Influenza Center	WHO Chinese National Influenza Center	Li Xiyan, Liu Jia, Dayan Wang
EPI_ISL_2696250	Asia / China / Shanghai	2021-01-07	B/Shanghai-Changning/117/2021	WHO Chinese National Influenza Center	WHO Chinese National Influenza Center	Li Xiyan, Liu Jia, Dayan Wang
EPI_ISL_2696251	Asia / China / Jiangxi	2021-01-13	B/Jiangxi-Donghu/38/2021	WHO Chinese National Influenza Center	WHO Chinese National Influenza Center	Li Xiyan, Liu Jia, Dayan Wang
EPI_ISL_2696252	Asia / China / Jiangxi	2021-01-13	B/Jiangxi-Donghu/311/2021	WHO Chinese National Influenza Center	WHO Chinese National Influenza Center	Li Xiyan, Liu Jia, Dayan Wang
EPI_ISL_2696253	Asia / China / Jiangxi	2021-01-06	B/Jiangxi-Zhanggong/31/2021	WHO Chinese National Influenza Center	WHO Chinese National Influenza Center	Li Xiyan, Liu Jia, Dayan Wang
EPI_ISL_2696254	Asia / China / Jiangxi	2021-01-06	B/Jiangxi-Zhanggong/32/2021	WHO Chinese National Influenza Center	WHO Chinese National Influenza Center	Li Xiyan, Liu Jia, Dayan Wang
EPI_ISL_2696255	Asia / China / Jiangxi	2021-01-06	B/Jiangxi-Zhanggong/33/2021	WHO Chinese National Influenza Center	WHO Chinese National Influenza Center	Li Xiyan, Liu Jia, Dayan Wang
EPI_ISL_2696256	Asia / China / Jiangxi	2021-01-06	B/Jiangxi-Zhanggong/35/2021	WHO Chinese National Influenza Center	WHO Chinese National Influenza Center	Li Xiyan, Liu Jia, Dayan Wang
EPI_ISL_2696257	Asia / China / Jiangxi	2021-01-06	B/Jiangxi-Zhanggong/39/2021	WHO Chinese National Influenza Center	WHO Chinese National Influenza Center	Li Xiyan, Liu Jia, Dayan Wang
EPI_ISL_2696258	Asia / China / Jiangxi	2021-01-11	B/Jiangxi-Yushui/344/2021	WHO Chinese National Influenza Center	WHO Chinese National Influenza Center	Li Xiyan, Liu Jia, Dayan Wang
EPI_ISL_2696259	Asia / China / Jiangxi	2021-01-13	B/Jiangxi-Yushui/345/2021	WHO Chinese National Influenza Center	WHO Chinese National Influenza Center	Li Xiyan, Liu Jia, Dayan Wang
EPI_ISL_2696260	Asia / China / Jiangxi	2021-01-13	B/Jiangxi-Yushui/346/2021	WHO Chinese National Influenza Center	WHO Chinese National Influenza Center	Li Xiyan, Liu Jia, Dayan Wang
EPI_ISL_2696261	Asia / China / Jiangxi	2021-01-13	B/Jiangxi-Yushui/347/2021	WHO Chinese National Influenza Center	WHO Chinese National Influenza Center	Li Xiyan, Liu Jia, Dayan Wang
EPI_ISL_2696262	Asia / China / Jiangxi	2021-01-14	B/Jiangxi-Yushui/349/2021	WHO Chinese National Influenza Center	WHO Chinese National Influenza Center	Li Xiyan, Liu Jia, Dayan Wang
EPI_ISL_2696263	Asia / China / Jiangxi	2021-01-14	B/Jiangxi-Yushui/350/2021	WHO Chinese National Influenza Center	WHO Chinese National Influenza Center	Li Xiyan, Liu Jia, Dayan Wang
EPI_ISL_2696264	Asia / China / Jiangxi	2021-01-06	B/Jiangxi-Zhanggong/38/2021	WHO Chinese National Influenza Center	WHO Chinese National Influenza Center	Li Xiyan, Liu Jia, Dayan Wang
EPI_ISL_2696265	Asia / China / Guizhou	2021-01-11	B/Guizhou-Huichuan/125/2021	WHO Chinese National Influenza Center	WHO Chinese National Influenza Center	Li Xiyan, Liu Jia, Dayan Wang
EPI_ISL_2696266	Asia / China / Guizhou	2020-12-23	B/Guizhou-Douyun/11092/2020	WHO Chinese National Influenza Center	WHO Chinese National Influenza Center	Li Xiyan, Liu Jia, Dayan Wang
EPI_ISL_2696267	Asia / China / Guizhou	2020-12-29	B/Guizhou-Douyun/11113/2020	WHO Chinese National Influenza Center	WHO Chinese National Influenza Center	Li Xiyan, Liu Jia, Dayan Wang
EPI_ISL_2696268	Asia / China / Guizhou	2020-12-24	B/Guizhou-Douyun/317/2020	WHO Chinese National Influenza Center	WHO Chinese National Influenza Center	Li Xiyan, Liu Jia, Dayan Wang
EPI_ISL_2696269	Asia / China / Guizhou	2020-12-24	B/Guizhou-Douyun/318/2020	WHO Chinese National Influenza Center	WHO Chinese National Influenza Center	Li Xiyan, Liu Jia, Dayan Wang
EPI_ISL_2696270	Asia / China / Guizhou	2021-01-05	B/Guizhou-Douyun/16/2021	WHO Chinese National Influenza Center	WHO Chinese National Influenza Center	Li Xiyan, Liu Jia, Dayan Wang
EPI_ISL_2696271	Asia / China / Guizhou	2021-01-05	B/Guizhou-Douyun/17/2021	WHO Chinese National Influenza Center	WHO Chinese National Influenza Center	Li Xiyan, Liu Jia, Dayan Wang
EPI_ISL_2696272	Asia / China / Guizhou	2021-01-05	B/Guizhou-Douyun/18/2021	WHO Chinese National Influenza Center	WHO Chinese National Influenza Center	Li Xiyan, Liu Jia, Dayan Wang
EPI_ISL_273902	Asia / Hong Kong (SAR)	2017-06-06	B/Hong Kong/286/2017	Government Virus Unit	Crick Worldwide Influenza Centre	NA
EPI_ISL_276542	Asia / Hong Kong (SAR)	2017-06-06	B/Hong Kong/286/2017	Government Virus Unit	Centers for Disease Control and Prevention	NA
EPI_ISL_276627	North America / United States / Maryland	2016-12-27	B/Maryland/15/2016	Maryland Department of Health and Mental Hygiene	Centers for Disease Control and Prevention	NA
EPI_ISL_276669	Asia / Hong Kong (SAR)	2017-06-06	B/Hong Kong/286/2017	Government Virus Unit	Crick Worldwide Influenza Centre	NA
EPI_ISL_276680	North America / United States	2016-12-27	B/Maryland/15/2016	Centers for Disease Control and Prevention	Crick Worldwide Influenza Centre	NA
EPI_ISL_276681	North America / United States	2016-12-27	B/Maryland/15/2016	Centers for Disease Control and Prevention	Crick Worldwide Influenza Centre	NA
EPI_ISL_282041	Asia / Kazakhstan	2017-01-12	B/Kazakhstan/128/2017	CSEE	Centers for Disease Control and Prevention	NA
EPI_ISL_282250	North America / United States / Maryland	2016-12-27	B/Maryland/15/2016	CSL Ltd	WHO Collaborating Centre for Reference and Research on Influenza	Deng,Y-M; Iannello,P; Lau,H; Kaye,M; Todd,A; Komadina,N.
EPI_ISL_282640	Europe / Russian Federation	2016-04-20	B/St Petersburg/293/2016	Centers for Disease Control and Prevention	WHO Collaborating Centre for Reference and Research on Influenza	Deng,Y-M; Iannello,P; Lau,H; Kaye,M; Todd,A; Komadina,N.
EPI_ISL_282641	North America / United States / Maryland	2016-12-27	B/Maryland/15/2016	Centers for Disease Control and Prevention	WHO Collaborating Centre for Reference and Research on Influenza	Deng,Y-M; Iannello,P; Lau,H; Kaye,M; Todd,A; Komadina,N.
EPI_ISL_2844833	Asia / China / Xining	2021-04-07	B/Qinghai-Chengdong/1404/2021	WHO Chinese National Influenza Center	WHO Chinese National Influenza Center	Li Xiyan, Huang Wei Juan, Liu Jia, Wang Dayan
EPI_ISL_2844834	Asia / China / Shixia	2021-03-11	B/Shanghai-Songjiang/1193/2021	WHO Chinese National Influenza Center	WHO Chinese National Influenza Center	Li Xiyan, Huang Wei Juan, Liu Jia, Wang Dayan
EPI_ISL_2844835	Asia / China	2021-02-27	B/Shanghai-Fengxian/1174/2021	WHO Chinese National Influenza Center	WHO Chinese National Influenza Center	Li Xiyan, Huang Wei Juan, Liu Jia, Wang Dayan
EPI_ISL_2844841	Asia / China / Baiyin	2021-04-13	B/Gansu-Baiyin/1281/2021	WHO Chinese National Influenza Center	WHO Chinese National Influenza Center	Li Xiyan, Huang Wei Juan, Liu Jia, Wang Dayan
EPI_ISL_2844842	Asia / China / Baiyin	2021-04-14	B/Gansu-Baiyin/1293/2021	WHO Chinese National Influenza Center	WHO Chinese National Influenza Center	Li Xiyan, Huang Wei Juan, Liu Jia, Wang Dayan
EPI_ISL_2844843	Asia / China / Lanzhou	2021-03-30	B/Gansu-Chengguan/1515/2021	WHO Chinese National Influenza Center	WHO Chinese National Influenza Center	Li Xiyan, Huang Wei Juan, Liu Jia, Wang Dayan
EPI_ISL_2844845	Asia / China / Baiyin	2021-04-06	B/Gansu-Baiyin/1269/2021	WHO Chinese National Influenza Center	WHO Chinese National Influenza Center	Li Xiyan, Huang Wei Juan, Liu Jia, Wang Dayan
EPI_ISL_285834	Asia / Kazakhstan	2017-01-12	B/Kazakhstan/128/2017	CSEE	Centers for Disease Control and Prevention	NA
EPI_ISL_285877	Asia / Kazakhstan	2017-01-12	B/Kazakhstan/128/2017	CSEE	Centers for Disease Control and Prevention	NA
EPI_ISL_286116	Asia / Kazakhstan	2017-01-12	B/Kazakhstan/128/2017	CSEE	Centers for Disease Control and Prevention	NA
EPI_ISL_287732	Asia / Hong Kong (SAR)	2017-06-06	B/Hong Kong/286/2017	Government Virus Unit	Centers for Disease Control and Prevention	NA
EPI_ISL_288968	North America / United States / Colorado	2017-02-25	B/Colorado/6/2017	Centers for Disease Control and Prevention	WHO Collaborating Centre for Reference and Research on Influenza	Deng,Y-M.; Iannello,P.; Lau,H.; Kaye,M.; Todd,A.; Komadina,N.
EPI_ISL_290800	Europe / Norway	2017	B/Norway/2409/2017	National Institute for Medical Research	Centers for Disease Control and Prevention	NA
EPI_ISL_290858	Europe / Norway	2017	B/Norway/2409/2017	National Institute for Medical Research	Centers for Disease Control and Prevention	NA
EPI_ISL_290861	Asia / Hong Kong (SAR)	2017-06-06	B/Hong Kong/286/2017	Government Virus Unit	Centers for Disease Control and Prevention	NA
EPI_ISL_290862	Asia / Hong Kong (SAR)	2017-06-06	B/Hong Kong/286/2017	Government Virus Unit	Centers for Disease Control and Prevention	NA
EPI_ISL_291286	Europe / Norway	2017	B/Norway/2409/2017	Crick Worldwide Influenza Centre	WHO Collaborating Centre for Reference and Research on Influenza	Deng,Y-M.; Iannello,P.; Lau,H.; Kaye,M.; Todd,A.; Komadina,N.
EPI_ISL_292772	Asia / China / Chongqing	2017-11-14	B/Chongqing-Banan/1840/2017	WHO Chinese National Influenza Center	WHO Chinese National Influenza Center	Xiaoxu,Zeng;Xiyan,Li;Weijuan,Huang;Lei,Yang;Dayan,Wang;Yuelong,Shu
EPI_ISL_303189	Asia / China	2017-11-14	B/Chongqing-Banan/1840/2017	WHO Chinese National Influenza Center	Centers for Disease Control and Prevention	NA
EPI_ISL_305414	Asia / Japan	2018-01-12	B/NAGASAKI/635/2018	Nagasaki Prefectural Institute for Environment Research and Public Health	National Institute of Infectious Diseases (NIID)	Kuwahara,Tomoko;Takashita,Emi;Fujisaki,Seiichiro;Shirakura,Masayuki;Watanabe,Shinji;Odagiri,Takato
EPI_ISL_312135	North America / United States / Maryland	2018-02-19	B/Maryland/15/2016	CSL Ltd	WHO Collaborating Centre for Reference and Research on Influenza	Deng,Y-M; Iannello,P; Lau,H; Kaye,M; Todd,A; Spirason,N; Komadina,N.
EPI_ISL_312680	Asia / Japan	2018-01-12	B/NAGASAKI/635/2018	Nagasaki Prefectural Institute for Environment Research and Public Health	National Institute of Infectious Diseases (NIID)	Kuwahara,Tomoko;Takashita,Emi;Fujisaki,Seiichiro;Shirakura,Masayuki;Watanabe,Shinji;Odagiri,Takato
EPI_ISL_312687	Asia / Japan	2018-01-12	B/NAGASAKI/635/2018	National Institute of Infectious Diseases (NIID)	National Institute of Infectious Diseases (NIID)	Kuwahara,Tomoko;Takashita,Emi;Fujisaki,Seiichiro;Shirakura,Masayuki;Watanabe,Shinji;Odagiri,Takato
EPI_ISL_312744	North America / United States / Maryland	2018-05-10	B/Maryland/15/2016	CSL Ltd	WHO Collaborating Centre for Reference and Research on Influenza	Deng,Y-M; Iannello,P; Lau,H; Kaye,M; Spirason,N; Komadina,N.
EPI_ISL_314706	North America / United States / Maryland	2016-12-27	B/Maryland/15/2016	Maryland Department of Health and Mental Hygiene	Centers for Disease Control and Prevention	NA
EPI_ISL_316139	Asia / Japan	2018-02-28	B/KAGAWA/18162/2018	Kagawa Prefectural Research Institute for Environmental Sciences and Public Health	National Institute of Infectious Diseases (NIID)	Kuwahara,Tomoko;Takashita,Emi;Fujisaki,Seiichiro;Shirakura,Masayuki;Watanabe,Shinji;Odagiri,Takato
EPI_ISL_330532	Africa / Nigeria	2018-01-16	B/Nigeria/3352/2018	National Influenza Reference Laboratory	Centers for Disease Control and Prevention	NA
EPI_ISL_331039	Asia / Japan	2018	B/Kagawa/18162/2018	National Institute of Infectious Diseases (NIID)	Centers for Disease Control and Prevention	NA
EPI_ISL_331041	Asia / Japan	2018	B/Nagasaki/635/2018	National Institute of Infectious Diseases (NIID)	Centers for Disease Control and Prevention	NA
EPI_ISL_331823	Oceania / Australia / Victoria	2018-08-22	B/Victoria/900/2018	Royal Chidrens Hospital	WHO Collaborating Centre for Reference and Research on Influenza	Deng,Y-M; Iannello,P; Lau,H; Kaye,M; Todd,A; Spirason,N; Komadina,N
EPI_ISL_332701	Oceania / Australia / Queensland / Bowen Hills	2018-10-19	B/Brisbane/35/2018	Queensland Health Forensic and Scientific Services	WHO Collaborating Centre for Reference and Research on Influenza	Deng,Y-M; Iannello,P; Lau,H; Kaye,M; Todd,A; Spirason,N; Komadina,N.
EPI_ISL_335838	Africa / Nigeria	2018-01-16	B/Nigeria/3352/2018	National Influenza Reference Laboratory	Centers for Disease Control and Prevention	NA
EPI_ISL_335844	Africa / Nigeria	2018-01-16	B/Nigeria/3352/2018	National Influenza Reference Laboratory	Centers for Disease Control and Prevention	NA
EPI_ISL_336856	Asia / China / Sichuan	2018-12-26	B/Sichuan-Gaoxin/531/2018	WHO Chinese National Influenza Center	WHO Chinese National Influenza Center	Xiaoxu,Zeng;Xiyan,Li;Weijuan,Huang;Lei,Yang;Dayan,Wang;Yuelong,Shu
EPI_ISL_336857	Asia / China / Sichuan	2019-01-02	B/Sichuan-Gaoxin/51/2019	WHO Chinese National Influenza Center	WHO Chinese National Influenza Center	Xiaoxu,Zeng;Xiyan,Li;Weijuan,Huang;Lei,Yang;Dayan,Wang;Yuelong,Shu
EPI_ISL_336858	Asia / China / Sichuan	2019-01-02	B/Sichuan-Gaoxin/52/2019	WHO Chinese National Influenza Center	WHO Chinese National Influenza Center	Xiaoxu,Zeng;Xiyan,Li;Weijuan,Huang;Lei,Yang;Dayan,Wang;Yuelong,Shu
EPI_ISL_336859	Asia / China / Sichuan	2019-01-02	B/Sichuan-Gaoxin/53/2019	WHO Chinese National Influenza Center	WHO Chinese National Influenza Center	Xiaoxu,Zeng;Xiyan,Li;Weijuan,Huang;Lei,Yang;Dayan,Wang;Yuelong,Shu
EPI_ISL_336860	Asia / China / Sichuan	2019-01-02	B/Sichuan-Gaoxin/55/2019	WHO Chinese National Influenza Center	WHO Chinese National Influenza Center	Xiaoxu,Zeng;Xiyan,Li;Weijuan,Huang;Lei,Yang;Dayan,Wang;Yuelong,Shu
EPI_ISL_336868	Asia / China / Sichuan	2018-12-26	B/Sichuan-Gaoxin/531/2018	WHO Chinese National Influenza Center	WHO Chinese National Influenza Center	Xiaoxu,Zeng;Xiyan,Li;Weijuan,Huang;Lei,Yang;Dayan,Wang;Yuelong,Shu
EPI_ISL_337297	Asia / China / Sichuan	2019-01-02	B/Sichuan-Gaoxin/53/2019	WHO Chinese National Influenza Center	WHO Chinese National Influenza Center	Xiaoxu,Zeng;Xiyan,Li;Weijuan,Huang;Lei,Yang;Dayan,Wang;Yuelong,Shu
EPI_ISL_337301	Asia / China / Sichuan	2019-01-03	B/Sichuan-Dongxin/120/2019	WHO Chinese National Influenza Center	WHO Chinese National Influenza Center	Xiaoxu,Zeng;Xiyan,Li;Weijuan,Huang;Lei,Yang;Dayan,Wang;Yuelong,Shu
EPI_ISL_338963	Oceania / Australia / Victoria / Clyde	2018-10-30	B/Victoria/705/2018	Monash Medical Centre	WHO Collaborating Centre for Reference and Research on Influenza	Deng,Y-M; Iannello,P; Lau,H; Kaye,M; Todd,A; Spirason,N; Komadina,N.
EPI_ISL_339138	Oceania / Australia / Queensland / Bowen Hills	2018-10-19	B/Brisbane/35/2018	Queensland Health Forensic and Scientific Services	WHO Collaborating Centre for Reference and Research on Influenza	Deng,Y-M; Iannello,P; Lau,H; Kaye,M; Todd,A; Spirason,N; Komadina,N.
EPI_ISL_341402	Oceania / Australia / Queensland / Bowen Hills	2018-10-19	B/Brisbane/35/2018	Queensland Health Forensic and Scientific Services	WHO Collaborating Centre for Reference and Research on Influenza	Deng,Y-M; Iannello,P; Lau,H; Kaye,M; Todd,A; Spirason,N; Komadina,N.
EPI_ISL_344383	Asia / China / Shanxi	2019-01-14	B/Shanxi-Xinghualing/1115/2019	WHO Chinese National Influenza Center	WHO Chinese National Influenza Center	Xiaoxu,Zeng;Xiyan,Li;Weijuan,Huang;Lei,Yang;Dayan,Wang;Yuelong,Shu
EPI_ISL_344384	Asia / China / Shanxi	2019-01-14	B/Shanxi-Xinghualing/1114/2019	WHO Chinese National Influenza Center	WHO Chinese National Influenza Center	Xiaoxu,Zeng;Xiyan,Li;Weijuan,Huang;Lei,Yang;Dayan,Wang;Yuelong,Shu
EPI_ISL_344385	Asia / China / Shanxi	2019-01-14	B/Shanxi-Xinghualing/1112/2019	WHO Chinese National Influenza Center	WHO Chinese National Influenza Center	Xiaoxu,Zeng;Xiyan,Li;Weijuan,Huang;Lei,Yang;Dayan,Wang;Yuelong,Shu
EPI_ISL_344386	Asia / China / Shanxi	2019-01-14	B/Shanxi-Xinghualing/1110/2019	WHO Chinese National Influenza Center	WHO Chinese National Influenza Center	Xiaoxu,Zeng;Xiyan,Li;Weijuan,Huang;Lei,Yang;Dayan,Wang;Yuelong,Shu
EPI_ISL_344387	Asia / China / Shanxi	2019-01-14	B/Shanxi-Xinghualing/1109/2019	WHO Chinese National Influenza Center	WHO Chinese National Influenza Center	Xiaoxu,Zeng;Xiyan,Li;Weijuan,Huang;Lei,Yang;Dayan,Wang;Yuelong,Shu
EPI_ISL_344388	Asia / China / Shanxi	2019-01-14	B/Shanxi-Xinghualing/1104/2019	WHO Chinese National Influenza Center	WHO Chinese National Influenza Center	Xiaoxu,Zeng;Xiyan,Li;Weijuan,Huang;Lei,Yang;Dayan,Wang;Yuelong,Shu
EPI_ISL_344389	Asia / China / Shanxi	2019-01-14	B/Shanxi-Xinghualing/1100/2019	WHO Chinese National Influenza Center	WHO Chinese National Influenza Center	Xiaoxu,Zeng;Xiyan,Li;Weijuan,Huang;Lei,Yang;Dayan,Wang;Yuelong,Shu
EPI_ISL_344390	Asia / China / Shanxi	2019-01-16	B/Shanxi-Chengqu/198/2019	WHO Chinese National Influenza Center	WHO Chinese National Influenza Center	Xiaoxu,Zeng;Xiyan,Li;Weijuan,Huang;Lei,Yang;Dayan,Wang;Yuelong,Shu
EPI_ISL_344391	Asia / China / Henan	2019-01-07	B/Henan-Hualong/131/2019	WHO Chinese National Influenza Center	WHO Chinese National Influenza Center	Xiaoxu,Zeng;Xiyan,Li;Weijuan,Huang;Lei,Yang;Dayan,Wang;Yuelong,Shu
EPI_ISL_344392	Asia / China / Anhui	2019-01-11	B/Anhui-Guichi/181/2019	WHO Chinese National Influenza Center	WHO Chinese National Influenza Center	Xiaoxu,Zeng;Xiyan,Li;Weijuan,Huang;Lei,Yang;Dayan,Wang;Yuelong,Shu
EPI_ISL_344393	Asia / China / Anhui	2019-01-11	B/Anhui-Guichi/175/2019	WHO Chinese National Influenza Center	WHO Chinese National Influenza Center	Xiaoxu,Zeng;Xiyan,Li;Weijuan,Huang;Lei,Yang;Dayan,Wang;Yuelong,Shu
EPI_ISL_344394	Asia / China / Anhui	2019-01-11	B/Anhui-Guichi/169/2019	WHO Chinese National Influenza Center	WHO Chinese National Influenza Center	Xiaoxu,Zeng;Xiyan,Li;Weijuan,Huang;Lei,Yang;Dayan,Wang;Yuelong,Shu
EPI_ISL_344395	Asia / China / Anhui	2019-01-03	B/Anhui-Tianjiaan/119/2019	WHO Chinese National Influenza Center	WHO Chinese National Influenza Center	Xiaoxu,Zeng;Xiyan,Li;Weijuan,Huang;Lei,Yang;Dayan,Wang;Yuelong,Shu
EPI_ISL_344396	Asia / China / Anhui	2019-01-02	B/Anhui-Tianjiaan/110/2019	WHO Chinese National Influenza Center	WHO Chinese National Influenza Center	Xiaoxu,Zeng;Xiyan,Li;Weijuan,Huang;Lei,Yang;Dayan,Wang;Yuelong,Shu
EPI_ISL_344398	Asia / China / Jiangxi	2019-01-09	B/Jiangxi-Donghu/315/2019	WHO Chinese National Influenza Center	WHO Chinese National Influenza Center	Xiaoxu,Zeng;Xiyan,Li;Weijuan,Huang;Lei,Yang;Dayan,Wang;Yuelong,Shu
EPI_ISL_344402	Asia / China / Shanxi	2019-01-14	B/Shanxi-Xinghualing/1116/2019	WHO Chinese National Influenza Center	WHO Chinese National Influenza Center	Xiaoxu,Zeng;Xiyan,Li;Weijuan,Huang;Lei,Yang;Dayan,Wang;Yuelong,Shu
EPI_ISL_344403	Asia / China / Shanxi	2019-01-02	B/Shanxi-Xinghualing/124/2019	WHO Chinese National Influenza Center	WHO Chinese National Influenza Center	Xiaoxu,Zeng;Xiyan,Li;Weijuan,Huang;Lei,Yang;Dayan,Wang;Yuelong,Shu
EPI_ISL_344404	Asia / China / Shanxi	2019-01-01	B/Shanxi-Xinghualing/17/2019	WHO Chinese National Influenza Center	WHO Chinese National Influenza Center	Xiaoxu,Zeng;Xiyan,Li;Weijuan,Huang;Lei,Yang;Dayan,Wang;Yuelong,Shu
EPI_ISL_348590	Europe / Italy / Friuli-Venezia Giulia / Province of Pordenone / Clyde	2018-10-30	B/Victoria/705/2018	Monash Medical Centre	WHO Collaborating Centre for Reference and Research on Influenza	Deng,Y-M; Iannello,P; Lau,H; Todd,A; Spirason,N; Komadina,N.
EPI_ISL_349990	North America / Canada	2019	B/Saskatchewan/RV0649/2019	National Microbiology Laboratory, Public Health Agency of Canada (PHAC)	Centers for Disease Control and Prevention	NA
EPI_ISL_353521	Asia / China	2018-12-26	B/Sichuan-Gaoxin/531/2018	WHO Chinese National Influenza Center	Centers for Disease Control and Prevention	NA
EPI_ISL_3535257	Asia / China	2019-11-26	B/Sichuan-Jingyang/12048/2019	WHO Collaborating Centre for Reference and Research on Influenza	Centers for Disease Control and Prevention	NA
EPI_ISL_355619	Asia / China	2018-12-26	B/Sichuan-Gaoxin/531/2018	WHO Chinese National Influenza Center	Centers for Disease Control and Prevention	NA
EPI_ISL_355657	Asia / China	2018-12-26	B/Sichuan-Gaoxin/531/2018	WHO Chinese National Influenza Center	Centers for Disease Control and Prevention	NA
EPI_ISL_355684	North America / United States / Louisiana	2019-03-26	B/Louisiana/16/2019	Louisiana Department of Health and Hospitals	Centers for Disease Control and Prevention	NA
EPI_ISL_355685	Asia / China	2018-12-26	B/Sichuan-Gaoxin/531/2018	WHO Chinese National Influenza Center	Centers for Disease Control and Prevention	NA
EPI_ISL_356340	North America / United States / Maine	2019-04-08	B/Maine/10/2019	Maine Health and Environmental Testing Laboratory	Centers for Disease Control and Prevention	NA
EPI_ISL_3613060	Asia / China / Jingyang	2019-11-26	B/Sichuan-Jingyang/12048/2019	WHO Chinese National Influenza Center	WHO Collaborating Centre for Reference and Research on Influenza	NA
EPI_ISL_362088	Asia / China	2018-12-26	B/Sichuan-Gaoxin/531/2018	WHO Chinese National Influenza Center	WHO Collaborating Centre for Reference and Research on Influenza	Deng,Y-M; Iannello,P; Lau,H; Todd,A; Spirason,N; Komadina,N.
EPI_ISL_363732	Asia / Japan	2019-04-27	B/KANAGAWA/IC18169/2019	National Institute of Infectious Diseases (NIID)	National Institute of Infectious Diseases (NIID)	Kuwahara,Tomoko;Takashita,Emi;Fujisaki,Seiichiro;Shirakura,Masayuki;Watanabe,Shinji;Odagiri,Takato
EPI_ISL_364286	Africa / Mozambique	2019-03-16	B/Mozambique/203/2019	Laborat√≥rio de Isolamento Viral	Centers for Disease Control and Prevention	NA
EPI_ISL_365164	Oceania / Australia / Victoria / Thornbury	2019-04-01	B/Victoria/905/2019	Royal Chidrens Hospital	WHO Collaborating Centre for Reference and Research on Influenza	Deng,Y-M; Iannello,P; Lau,H; Todd,A; Spirason,N; Komadina,N.
EPI_ISL_365699	North America / United States / Arizona	2019-06-17	B/Arizona/13/2019	Arizona Department of Health Services	Centers for Disease Control and Prevention	NA
EPI_ISL_367005	Asia / China / Shanxi	2019-04-15	B/Shanxi-Chengqu/1562/2019	WHO Chinese National Influenza Center	WHO Chinese National Influenza Center	Xiaoxu,Zeng;Xiyan,Li;Weijuan,Huang;Lei,Yang;Dayan,Wang;Yuelong,Shu
EPI_ISL_367006	Asia / China / Shanghai	2019-06-01	B/Shanghai-Huangpu/1531/2019	WHO Chinese National Influenza Center	WHO Chinese National Influenza Center	Xiaoxu,Zeng;Xiyan,Li;Weijuan,Huang;Lei,Yang;Dayan,Wang;Yuelong,Shu
EPI_ISL_367007	Asia / China / Yunnan	2019-06-01	B/Yunnan-Chuxiong/11566/2019	WHO Chinese National Influenza Center	WHO Chinese National Influenza Center	Xiaoxu,Zeng;Xiyan,Li;Weijuan,Huang;Lei,Yang;Dayan,Wang;Yuelong,Shu
EPI_ISL_367008	Asia / China / Guangxi	2019-04-16	B/Guangxi-Qinnan/319/2019	WHO Chinese National Influenza Center	WHO Chinese National Influenza Center	Xiaoxu,Zeng;Xiyan,Li;Weijuan,Huang;Lei,Yang;Dayan,Wang;Yuelong,Shu
EPI_ISL_367009	Asia / China / Neimenggu	2019-04-16	B/Neimenggu-Hongshan/1273/2019	WHO Chinese National Influenza Center	WHO Chinese National Influenza Center	Xiaoxu,Zeng;Xiyan,Li;Weijuan,Huang;Lei,Yang;Dayan,Wang;Yuelong,Shu
EPI_ISL_367010	Asia / China / Sichuan	2019-04-03	B/Sichuan-Gaoxin/1287/2019	WHO Chinese National Influenza Center	WHO Chinese National Influenza Center	Xiaoxu,Zeng;Xiyan,Li;Weijuan,Huang;Lei,Yang;Dayan,Wang;Yuelong,Shu
EPI_ISL_367011	Asia / China / Yunnan	2019-06-03	B/Yunnan-Chuxiong/11569/2019	WHO Chinese National Influenza Center	WHO Chinese National Influenza Center	Xiaoxu,Zeng;Xiyan,Li;Weijuan,Huang;Lei,Yang;Dayan,Wang;Yuelong,Shu
EPI_ISL_367012	Asia / China / Guizhou	2019-04-18	B/Guizhou-Chishui/53/2019	WHO Chinese National Influenza Center	WHO Chinese National Influenza Center	Xiaoxu,Zeng;Xiyan,Li;Weijuan,Huang;Lei,Yang;Dayan,Wang;Yuelong,Shu
EPI_ISL_367013	Asia / China / Hubei	2019-04-19	B/Hubei-Zengdou/1378/2019	WHO Chinese National Influenza Center	WHO Chinese National Influenza Center	Xiaoxu,Zeng;Xiyan,Li;Weijuan,Huang;Lei,Yang;Dayan,Wang;Yuelong,Shu
EPI_ISL_367014	Asia / China / Shanghai	2019-06-01	B/Shanghai-Huangpu/1531/2019	WHO Chinese National Influenza Center	WHO Chinese National Influenza Center	Xiaoxu,Zeng;Xiyan,Li;Weijuan,Huang;Lei,Yang;Dayan,Wang;Yuelong,Shu
EPI_ISL_367015	Asia / China / Gansu	2019-04-18	B/Gansu-Chengguan/1652/2019	WHO Chinese National Influenza Center	WHO Chinese National Influenza Center	Xiaoxu,Zeng;Xiyan,Li;Weijuan,Huang;Lei,Yang;Dayan,Wang;Yuelong,Shu
EPI_ISL_367016	Asia / China / Anhui	2019-04-17	B/Anhui-Qiaocheng/1506/2019	WHO Chinese National Influenza Center	WHO Chinese National Influenza Center	Xiaoxu,Zeng;Xiyan,Li;Weijuan,Huang;Lei,Yang;Dayan,Wang;Yuelong,Shu
EPI_ISL_367017	Asia / China / Jilin	2019-04-16	B/Jilin-Longshan/1306/2019	WHO Chinese National Influenza Center	WHO Chinese National Influenza Center	Xiaoxu,Zeng;Xiyan,Li;Weijuan,Huang;Lei,Yang;Dayan,Wang;Yuelong,Shu
EPI_ISL_367068	Asia / China / Yunnan	2019-04-02	B/Yunnan-Zhaoyang/1302/2019	WHO Chinese National Influenza Center	WHO Chinese National Influenza Center	Xiaoxu,Zeng;Xiyan,Li;Weijuan,Huang;Lei,Yang;Dayan,Wang;Yuelong,Shu
EPI_ISL_367069	Asia / China / Hebei	2019-04-01	B/Hebei-Zunhua/1286/2019	WHO Chinese National Influenza Center	WHO Chinese National Influenza Center	Xiaoxu,Zeng;Xiyan,Li;Weijuan,Huang;Lei,Yang;Dayan,Wang;Yuelong,Shu
EPI_ISL_367070	Asia / China / Tianjin	2019-03-26	B/Tianjin-Beichen/315/2019	WHO Chinese National Influenza Center	WHO Chinese National Influenza Center	Xiaoxu,Zeng;Xiyan,Li;Weijuan,Huang;Lei,Yang;Dayan,Wang;Yuelong,Shu
EPI_ISL_367071	Asia / China / Jiangxi	2019-04-23	B/Jiangxi-Anyuan/1411/2019	WHO Chinese National Influenza Center	WHO Chinese National Influenza Center	Xiaoxu,Zeng;Xiyan,Li;Weijuan,Huang;Lei,Yang;Dayan,Wang;Yuelong,Shu
EPI_ISL_367072	Asia / China / Neimenggu	2019-04-09	B/Neimenggu-Donghe/1313/2019	WHO Chinese National Influenza Center	WHO Chinese National Influenza Center	Xiaoxu,Zeng;Xiyan,Li;Weijuan,Huang;Lei,Yang;Dayan,Wang;Yuelong,Shu
EPI_ISL_367073	Asia / China / Fujian	2019-04-08	B/Fujian-Siming/1284/2019	WHO Chinese National Influenza Center	WHO Chinese National Influenza Center	Xiaoxu,Zeng;Xiyan,Li;Weijuan,Huang;Lei,Yang;Dayan,Wang;Yuelong,Shu
EPI_ISL_367074	Asia / China / Shaanxi	2019-03-26	B/Shaanxi-Beilin/1248/2019	WHO Chinese National Influenza Center	WHO Chinese National Influenza Center	Xiaoxu,Zeng;Xiyan,Li;Weijuan,Huang;Lei,Yang;Dayan,Wang;Yuelong,Shu
EPI_ISL_367075	Asia / China / Neimenggu	2019-05-06	B/Neimenggu-Kundoulun/1325/2019	WHO Chinese National Influenza Center	WHO Chinese National Influenza Center	Xiaoxu,Zeng;Xiyan,Li;Weijuan,Huang;Lei,Yang;Dayan,Wang;Yuelong,Shu
EPI_ISL_367076	Asia / China / Fujian	2019-05-06	B/Fujian-Siming/1366/2019	WHO Chinese National Influenza Center	WHO Chinese National Influenza Center	Xiaoxu,Zeng;Xiyan,Li;Weijuan,Huang;Lei,Yang;Dayan,Wang;Yuelong,Shu
EPI_ISL_367077	Asia / China / Guangxi	2019-05-14	B/Guangxi-Xixiangtang/1423/2019	WHO Chinese National Influenza Center	WHO Chinese National Influenza Center	Xiaoxu,Zeng;Xiyan,Li;Weijuan,Huang;Lei,Yang;Dayan,Wang;Yuelong,Shu
EPI_ISL_367078	Asia / China / Neimenggu	2019-05-13	B/Neimenggu-Kundoulun/1331/2019	WHO Chinese National Influenza Center	WHO Chinese National Influenza Center	Xiaoxu,Zeng;Xiyan,Li;Weijuan,Huang;Lei,Yang;Dayan,Wang;Yuelong,Shu
EPI_ISL_367079	Asia / China / Beijing	2019-05-13	B/Beijing-Huairou/1885/2019	WHO Chinese National Influenza Center	WHO Chinese National Influenza Center	Xiaoxu,Zeng;Xiyan,Li;Weijuan,Huang;Lei,Yang;Dayan,Wang;Yuelong,Shu
EPI_ISL_367080	Asia / China / Guangdong	2019-05-10	B/Guangdong-Chengqu/8103/2019	WHO Chinese National Influenza Center	WHO Chinese National Influenza Center	Xiaoxu,Zeng;Xiyan,Li;Weijuan,Huang;Lei,Yang;Dayan,Wang;Yuelong,Shu
EPI_ISL_367081	Asia / China / Guangdong	2019-05-10	B/Guangdong-Chengqu/8103/2019	WHO Chinese National Influenza Center	WHO Chinese National Influenza Center	Xiaoxu,Zeng;Xiyan,Li;Weijuan,Huang;Lei,Yang;Dayan,Wang;Yuelong,Shu
EPI_ISL_367082	Asia / China / Shanghai	2019-05-23	B/Shanghai-Putuo/1412/2019	WHO Chinese National Influenza Center	WHO Chinese National Influenza Center	Xiaoxu,Zeng;Xiyan,Li;Weijuan,Huang;Lei,Yang;Dayan,Wang;Yuelong,Shu
EPI_ISL_367083	Asia / China / Shanghai	2019-05-23	B/Shanghai-Putuo/1412/2019	WHO Chinese National Influenza Center	WHO Chinese National Influenza Center	Xiaoxu,Zeng;Xiyan,Li;Weijuan,Huang;Lei,Yang;Dayan,Wang;Yuelong,Shu
EPI_ISL_367084	Asia / China / Guangxi	2019-05-20	B/Guangxi-Xixiangtang/1456/2019	WHO Chinese National Influenza Center	WHO Chinese National Influenza Center	Xiaoxu,Zeng;Xiyan,Li;Weijuan,Huang;Lei,Yang;Dayan,Wang;Yuelong,Shu
EPI_ISL_367085	Asia / China / Guangxi	2019-05-14	B/Guangxi-Xixiangtang/1423/2019	WHO Chinese National Influenza Center	WHO Chinese National Influenza Center	Xiaoxu,Zeng;Xiyan,Li;Weijuan,Huang;Lei,Yang;Dayan,Wang;Yuelong,Shu
EPI_ISL_367086	Asia / China / Guangxi	2019-05-20	B/Guangxi-Xixiangtang/1456/2019	WHO Chinese National Influenza Center	WHO Chinese National Influenza Center	Xiaoxu,Zeng;Xiyan,Li;Weijuan,Huang;Lei,Yang;Dayan,Wang;Yuelong,Shu
EPI_ISL_367087	Asia / China / Fujian	2019-05-06	B/Fujian-Siming/1366/2019	WHO Chinese National Influenza Center	WHO Chinese National Influenza Center	Xiaoxu,Zeng;Xiyan,Li;Weijuan,Huang;Lei,Yang;Dayan,Wang;Yuelong,Shu
EPI_ISL_367088	Asia / China / Hebei	2019-05-07	B/Hebei-Jizhou/1308/2019	WHO Chinese National Influenza Center	WHO Chinese National Influenza Center	Xiaoxu,Zeng;Xiyan,Li;Weijuan,Huang;Lei,Yang;Dayan,Wang;Yuelong,Shu
EPI_ISL_367089	Asia / China / Sichuan	2019-05-07	B/Sichuan-Dongqu/1621/2019	WHO Chinese National Influenza Center	WHO Chinese National Influenza Center	Xiaoxu,Zeng;Xiyan,Li;Weijuan,Huang;Lei,Yang;Dayan,Wang;Yuelong,Shu
EPI_ISL_367090	Asia / China / Guizhou	2019-05-09	B/Guizhou-Honghuagang/1392/2019	WHO Chinese National Influenza Center	WHO Chinese National Influenza Center	Xiaoxu,Zeng;Xiyan,Li;Weijuan,Huang;Lei,Yang;Dayan,Wang;Yuelong,Shu
EPI_ISL_367091	Asia / China / Hainan	2019-05-20	B/Hainan-Xiuying/1419/2019	WHO Chinese National Influenza Center	WHO Chinese National Influenza Center	Xiaoxu,Zeng;Xiyan,Li;Weijuan,Huang;Lei,Yang;Dayan,Wang;Yuelong,Shu
EPI_ISL_367092	Asia / China / Gansu	2019-05-06	B/Gansu-Chengguan/1721/2019	WHO Chinese National Influenza Center	WHO Chinese National Influenza Center	Xiaoxu,Zeng;Xiyan,Li;Weijuan,Huang;Lei,Yang;Dayan,Wang;Yuelong,Shu
EPI_ISL_367093	Asia / China / Neimenggu	2019-05-13	B/Neimenggu-Kundoulun/1331/2019	WHO Chinese National Influenza Center	WHO Chinese National Influenza Center	Xiaoxu,Zeng;Xiyan,Li;Weijuan,Huang;Lei,Yang;Dayan,Wang;Yuelong,Shu
EPI_ISL_367096	Asia / China / Hebei	2019-03-05	B/Hebei-Luquan/1179/2019	WHO Chinese National Influenza Center	WHO Chinese National Influenza Center	Xiaoxu,Zeng;Xiyan,Li;Weijuan,Huang;Lei,Yang;Dayan,Wang;Yuelong,Shu
EPI_ISL_367097	Asia / China / Liaoning	2019-04-01	B/Liaoning-Huanggu/1528/2019	WHO Chinese National Influenza Center	WHO Chinese National Influenza Center	Xiaoxu,Zeng;Xiyan,Li;Weijuan,Huang;Lei,Yang;Dayan,Wang;Yuelong,Shu
EPI_ISL_367098	Asia / China / Shanghai	2019-04-01	B/Shanghai-Jiading/1274/2019	WHO Chinese National Influenza Center	WHO Chinese National Influenza Center	Xiaoxu,Zeng;Xiyan,Li;Weijuan,Huang;Lei,Yang;Dayan,Wang;Yuelong,Shu
EPI_ISL_367099	Asia / China / Guangdong	2019-04-01	B/Guangdong-Qingcheng/1254/2019	WHO Chinese National Influenza Center	WHO Chinese National Influenza Center	Xiaoxu,Zeng;Xiyan,Li;Weijuan,Huang;Lei,Yang;Dayan,Wang;Yuelong,Shu
EPI_ISL_367100	Asia / China / Jiangsu	2019-04-10	B/Jiangsu-Lishui/322/2019	WHO Chinese National Influenza Center	WHO Chinese National Influenza Center	Xiaoxu,Zeng;Xiyan,Li;Weijuan,Huang;Lei,Yang;Dayan,Wang;Yuelong,Shu
EPI_ISL_367101	Asia / China / Henan	2019-04-01	B/Henan-Xigong/1280/2019	WHO Chinese National Influenza Center	WHO Chinese National Influenza Center	Xiaoxu,Zeng;Xiyan,Li;Weijuan,Huang;Lei,Yang;Dayan,Wang;Yuelong,Shu
EPI_ISL_367102	Asia / China / Henan	2019-04-09	B/Henan-Wolong/1275/2019	WHO Chinese National Influenza Center	WHO Chinese National Influenza Center	Xiaoxu,Zeng;Xiyan,Li;Weijuan,Huang;Lei,Yang;Dayan,Wang;Yuelong,Shu
EPI_ISL_367103	Asia / China / Liaoning	2019-04-08	B/Liaoning-Xigang/1524/2019	WHO Chinese National Influenza Center	WHO Chinese National Influenza Center	Xiaoxu,Zeng;Xiyan,Li;Weijuan,Huang;Lei,Yang;Dayan,Wang;Yuelong,Shu
EPI_ISL_367104	Asia / China / Hebei	2019-03-05	B/Hebei-Luquan/1179/2019	WHO Chinese National Influenza Center	WHO Chinese National Influenza Center	Xiaoxu,Zeng;Xiyan,Li;Weijuan,Huang;Lei,Yang;Dayan,Wang;Yuelong,Shu
EPI_ISL_367105	Asia / China / Beijing	2019-04-08	B/Beijing-Haidian/1290/2019	WHO Chinese National Influenza Center	WHO Chinese National Influenza Center	Xiaoxu,Zeng;Xiyan,Li;Weijuan,Huang;Lei,Yang;Dayan,Wang;Yuelong,Shu
EPI_ISL_367117	Asia / China / Macao	2019-02-28	B/Macao/601584/2019	WHO Chinese National Influenza Center	WHO Chinese National Influenza Center	Xiaoxu,Zeng;Xiyan,Li;Weijuan,Huang;Lei,Yang;Dayan,Wang;Yuelong,Shu
EPI_ISL_367118	Asia / China / Macao	2019-02-25	B/Macao/601501/2019	WHO Chinese National Influenza Center	WHO Chinese National Influenza Center	Xiaoxu,Zeng;Xiyan,Li;Weijuan,Huang;Lei,Yang;Dayan,Wang;Yuelong,Shu
EPI_ISL_367127	Asia / China / Hunan	2019-03-04	B/Hunan-Yuhua/1379/2019	WHO Chinese National Influenza Center	WHO Chinese National Influenza Center	Xiaoxu,Zeng;Xiyan,Li;Weijuan,Huang;Lei,Yang;Dayan,Wang;Yuelong,Shu
EPI_ISL_367128	Asia / China / Guizhou	2019-03-11	B/Guizhou-Pingba/35/2019	WHO Chinese National Influenza Center	WHO Chinese National Influenza Center	Xiaoxu,Zeng;Xiyan,Li;Weijuan,Huang;Lei,Yang;Dayan,Wang;Yuelong,Shu
EPI_ISL_367129	Asia / China / Shanxi	2019-02-11	B/Shanxi-Xinfu/1146/2019	WHO Chinese National Influenza Center	WHO Chinese National Influenza Center	Xiaoxu,Zeng;Xiyan,Li;Weijuan,Huang;Lei,Yang;Dayan,Wang;Yuelong,Shu
EPI_ISL_367130	Asia / China / Hubei	2019-03-18	B/Hubei-Echeng/11625/2019	WHO Chinese National Influenza Center	WHO Chinese National Influenza Center	Xiaoxu,Zeng;Xiyan,Li;Weijuan,Huang;Lei,Yang;Dayan,Wang;Yuelong,Shu
EPI_ISL_367131	Asia / China / Shanghai	2019-03-04	B/Shanghai-Songjiang/1189/2019	WHO Chinese National Influenza Center	WHO Chinese National Influenza Center	Xiaoxu,Zeng;Xiyan,Li;Weijuan,Huang;Lei,Yang;Dayan,Wang;Yuelong,Shu
EPI_ISL_367132	Asia / China / Henan	2019-03-05	B/Henan-Xiangcheng/1193/2019	WHO Chinese National Influenza Center	WHO Chinese National Influenza Center	Xiaoxu,Zeng;Xiyan,Li;Weijuan,Huang;Lei,Yang;Dayan,Wang;Yuelong,Shu
EPI_ISL_367133	Asia / China / Anhui	2019-03-04	B/Anhui-Shushan/383/2019	WHO Chinese National Influenza Center	WHO Chinese National Influenza Center	Xiaoxu,Zeng;Xiyan,Li;Weijuan,Huang;Lei,Yang;Dayan,Wang;Yuelong,Shu
EPI_ISL_367134	Asia / China / Jiangxi	2019-03-11	B/Jiangxi-Yuanzhou/1412/2019	WHO Chinese National Influenza Center	WHO Chinese National Influenza Center	Xiaoxu,Zeng;Xiyan,Li;Weijuan,Huang;Lei,Yang;Dayan,Wang;Yuelong,Shu
EPI_ISL_367135	Asia / China / Yunnan	2019-03-09	B/Yunnan-Zhaoyang/1238/2019	WHO Chinese National Influenza Center	WHO Chinese National Influenza Center	Xiaoxu,Zeng;Xiyan,Li;Weijuan,Huang;Lei,Yang;Dayan,Wang;Yuelong,Shu
EPI_ISL_367136	Asia / China / Guangdong	2019-03-01	B/Guangdong-Yantian/34/2019	WHO Chinese National Influenza Center	WHO Chinese National Influenza Center	Xiaoxu,Zeng;Xiyan,Li;Weijuan,Huang;Lei,Yang;Dayan,Wang;Yuelong,Shu
EPI_ISL_367137	Asia / China / Guangdong	2019-03-04	B/Guangdong-Leizhou/38/2019	WHO Chinese National Influenza Center	WHO Chinese National Influenza Center	Xiaoxu,Zeng;Xiyan,Li;Weijuan,Huang;Lei,Yang;Dayan,Wang;Yuelong,Shu
EPI_ISL_367138	Asia / China / Hebei	2019-03-04	B/Hebei-Haigang/1197/2019	WHO Chinese National Influenza Center	WHO Chinese National Influenza Center	Xiaoxu,Zeng;Xiyan,Li;Weijuan,Huang;Lei,Yang;Dayan,Wang;Yuelong,Shu
EPI_ISL_367139	Asia / China / Gansu	2019-03-07	B/Gansu-Dunhuang/1231/2019	WHO Chinese National Influenza Center	WHO Chinese National Influenza Center	Xiaoxu,Zeng;Xiyan,Li;Weijuan,Huang;Lei,Yang;Dayan,Wang;Yuelong,Shu
EPI_ISL_367140	Asia / China / Liaoning	2019-03-04	B/Liaoning-Xigang/1374/2019	WHO Chinese National Influenza Center	WHO Chinese National Influenza Center	Xiaoxu,Zeng;Xiyan,Li;Weijuan,Huang;Lei,Yang;Dayan,Wang;Yuelong,Shu
EPI_ISL_367141	Asia / China / Jilin	2019-02-19	B/Jilin-Hunjiang/1187/2019	WHO Chinese National Influenza Center	WHO Chinese National Influenza Center	Xiaoxu,Zeng;Xiyan,Li;Weijuan,Huang;Lei,Yang;Dayan,Wang;Yuelong,Shu
EPI_ISL_367142	Asia / China / Shanghai	2019-03-04	B/Shanghai-Changning/1261/2019	WHO Chinese National Influenza Center	WHO Chinese National Influenza Center	Xiaoxu,Zeng;Xiyan,Li;Weijuan,Huang;Lei,Yang;Dayan,Wang;Yuelong,Shu
EPI_ISL_367143	Asia / China / Hubei	2019-03-12	B/Hubei-Danjiangkou/31/2019	WHO Chinese National Influenza Center	WHO Chinese National Influenza Center	Xiaoxu,Zeng;Xiyan,Li;Weijuan,Huang;Lei,Yang;Dayan,Wang;Yuelong,Shu
EPI_ISL_367144	Asia / China / Yunnan	2019-03-05	B/Yunnan-Zhaoyang/1213/2019	WHO Chinese National Influenza Center	WHO Chinese National Influenza Center	Xiaoxu,Zeng;Xiyan,Li;Weijuan,Huang;Lei,Yang;Dayan,Wang;Yuelong,Shu
EPI_ISL_367145	Asia / China / Beijing	2019-02-26	B/Beijing-Huairou/1373/2019	WHO Chinese National Influenza Center	WHO Chinese National Influenza Center	Xiaoxu,Zeng;Xiyan,Li;Weijuan,Huang;Lei,Yang;Dayan,Wang;Yuelong,Shu
EPI_ISL_367146	Asia / China / Jiangxi	2019-03-06	B/Jiangxi-Zhanggong/31/2019	WHO Chinese National Influenza Center	WHO Chinese National Influenza Center	Xiaoxu,Zeng;Xiyan,Li;Weijuan,Huang;Lei,Yang;Dayan,Wang;Yuelong,Shu
EPI_ISL_367147	Asia / China / Hubei	2019-03-09	B/Hubei-Dongbao/310/2019	WHO Chinese National Influenza Center	WHO Chinese National Influenza Center	Xiaoxu,Zeng;Xiyan,Li;Weijuan,Huang;Lei,Yang;Dayan,Wang;Yuelong,Shu
EPI_ISL_367148	Asia / China / Neimenggu	2019-03-06	B/Neimenggu-Donghe/1229/2019	WHO Chinese National Influenza Center	WHO Chinese National Influenza Center	Xiaoxu,Zeng;Xiyan,Li;Weijuan,Huang;Lei,Yang;Dayan,Wang;Yuelong,Shu
EPI_ISL_367149	Asia / China / Beijing	2019-03-13	B/Beijing-Haidian/1223/2019	WHO Chinese National Influenza Center	WHO Chinese National Influenza Center	Xiaoxu,Zeng;Xiyan,Li;Weijuan,Huang;Lei,Yang;Dayan,Wang;Yuelong,Shu
EPI_ISL_367150	Asia / China / Anhui	2019-03-05	B/Anhui-Tianjiaan/1323/2019	WHO Chinese National Influenza Center	WHO Chinese National Influenza Center	Xiaoxu,Zeng;Xiyan,Li;Weijuan,Huang;Lei,Yang;Dayan,Wang;Yuelong,Shu
EPI_ISL_367151	Asia / China / Henan	2019-03-18	B/Henan-Wolong/1250/2019	WHO Chinese National Influenza Center	WHO Chinese National Influenza Center	Xiaoxu,Zeng;Xiyan,Li;Weijuan,Huang;Lei,Yang;Dayan,Wang;Yuelong,Shu
EPI_ISL_367152	Asia / China / Hubei	2019-03-09	B/Hubei-Dongbao/310/2019	WHO Chinese National Influenza Center	WHO Chinese National Influenza Center	Xiaoxu,Zeng;Xiyan,Li;Weijuan,Huang;Lei,Yang;Dayan,Wang;Yuelong,Shu
EPI_ISL_367153	Asia / China / Liaoning	2019-03-11	B/Liaoning-Huanggu/1408/2019	WHO Chinese National Influenza Center	WHO Chinese National Influenza Center	Xiaoxu,Zeng;Xiyan,Li;Weijuan,Huang;Lei,Yang;Dayan,Wang;Yuelong,Shu
EPI_ISL_367154	Asia / China / Neimenggu	2019-03-06	B/Neimenggu-Donghe/1229/2019	WHO Chinese National Influenza Center	WHO Chinese National Influenza Center	Xiaoxu,Zeng;Xiyan,Li;Weijuan,Huang;Lei,Yang;Dayan,Wang;Yuelong,Shu
EPI_ISL_367155	Asia / China / Beijing	2019-03-13	B/Beijing-Haidian/1223/2019	WHO Chinese National Influenza Center	WHO Chinese National Influenza Center	Xiaoxu,Zeng;Xiyan,Li;Weijuan,Huang;Lei,Yang;Dayan,Wang;Yuelong,Shu
EPI_ISL_367156	Asia / China / Anhui	2019-03-05	B/Anhui-Tianjiaan/1323/2019	WHO Chinese National Influenza Center	WHO Chinese National Influenza Center	Xiaoxu,Zeng;Xiyan,Li;Weijuan,Huang;Lei,Yang;Dayan,Wang;Yuelong,Shu
EPI_ISL_367157	Asia / China / Henan	2019-03-18	B/Henan-Wolong/1250/2019	WHO Chinese National Influenza Center	WHO Chinese National Influenza Center	Xiaoxu,Zeng;Xiyan,Li;Weijuan,Huang;Lei,Yang;Dayan,Wang;Yuelong,Shu
EPI_ISL_367158	Asia / China / Shaanxi	2019-02-18	B/Shaanxi-Linwei/1180/2019	WHO Chinese National Influenza Center	WHO Chinese National Influenza Center	Xiaoxu,Zeng;Xiyan,Li;Weijuan,Huang;Lei,Yang;Dayan,Wang;Yuelong,Shu
EPI_ISL_367159	Asia / China / Liaoning	2019-03-11	B/Liaoning-Huanggu/1408/2019	WHO Chinese National Influenza Center	WHO Chinese National Influenza Center	Xiaoxu,Zeng;Xiyan,Li;Weijuan,Huang;Lei,Yang;Dayan,Wang;Yuelong,Shu
EPI_ISL_367160	Asia / China / Shaanxi	2019-02-18	B/Shaanxi-Linwei/1180/2019	WHO Chinese National Influenza Center	WHO Chinese National Influenza Center	Xiaoxu,Zeng;Xiyan,Li;Weijuan,Huang;Lei,Yang;Dayan,Wang;Yuelong,Shu
EPI_ISL_367166	Asia / China / Anhui	2019-03-04	B/Anhui-Yingjiang/1831/2019	WHO Chinese National Influenza Center	WHO Chinese National Influenza Center	Xiaoxu,Zeng;Xiyan,Li;Weijuan,Huang;Lei,Yang;Dayan,Wang;Yuelong,Shu
EPI_ISL_367167	Asia / China / Hunan	2019-02-14	B/Hunan-Wuling/12664/2019	WHO Chinese National Influenza Center	WHO Chinese National Influenza Center	Xiaoxu,Zeng;Xiyan,Li;Weijuan,Huang;Lei,Yang;Dayan,Wang;Yuelong,Shu
EPI_ISL_367168	Asia / China / Sichuan	2019-02-09	B/Sichuan-Qingyang/1225/2019	WHO Chinese National Influenza Center	WHO Chinese National Influenza Center	Xiaoxu,Zeng;Xiyan,Li;Weijuan,Huang;Lei,Yang;Dayan,Wang;Yuelong,Shu
EPI_ISL_367169	Asia / China / Beijing	2019-03-04	B/Beijing-Chaoyang/1553/2019	WHO Chinese National Influenza Center	WHO Chinese National Influenza Center	Xiaoxu,Zeng;Xiyan,Li;Weijuan,Huang;Lei,Yang;Dayan,Wang;Yuelong,Shu
EPI_ISL_367170	Asia / China / Jiangxi	2019-03-04	B/Jiangxi-Yushui/385/2019	WHO Chinese National Influenza Center	WHO Chinese National Influenza Center	Xiaoxu,Zeng;Xiyan,Li;Weijuan,Huang;Lei,Yang;Dayan,Wang;Yuelong,Shu
EPI_ISL_367171	Asia / China / Henan	2019-02-20	B/Henan-Weidong/1153/2019	WHO Chinese National Influenza Center	WHO Chinese National Influenza Center	Xiaoxu,Zeng;Xiyan,Li;Weijuan,Huang;Lei,Yang;Dayan,Wang;Yuelong,Shu
EPI_ISL_367172	Asia / China / Zhejiang	2019-02-18	B/Zhejiang-Haishu/1374/2019	WHO Chinese National Influenza Center	WHO Chinese National Influenza Center	Xiaoxu,Zeng;Xiyan,Li;Weijuan,Huang;Lei,Yang;Dayan,Wang;Yuelong,Shu
EPI_ISL_367173	Asia / China / Fujian	2019-02-18	B/Fujian-Tongan/1133/2019	WHO Chinese National Influenza Center	WHO Chinese National Influenza Center	Xiaoxu,Zeng;Xiyan,Li;Weijuan,Huang;Lei,Yang;Dayan,Wang;Yuelong,Shu
EPI_ISL_367174	Asia / China / Shaanxi	2019-02-12	B/Shaanxi-Linwei/1161/2019	WHO Chinese National Influenza Center	WHO Chinese National Influenza Center	Xiaoxu,Zeng;Xiyan,Li;Weijuan,Huang;Lei,Yang;Dayan,Wang;Yuelong,Shu
EPI_ISL_367175	Asia / China / Liaoning	2019-02-27	B/Liaoning-Huanggu/1350/2019	WHO Chinese National Influenza Center	WHO Chinese National Influenza Center	Xiaoxu,Zeng;Xiyan,Li;Weijuan,Huang;Lei,Yang;Dayan,Wang;Yuelong,Shu
EPI_ISL_367176	Asia / China / Anhui	2019-02-05	B/Anhui-Baohe/1116/2019	WHO Chinese National Influenza Center	WHO Chinese National Influenza Center	Xiaoxu,Zeng;Xiyan,Li;Weijuan,Huang;Lei,Yang;Dayan,Wang;Yuelong,Shu
EPI_ISL_367177	Asia / China / Shanxi	2019-02-03	B/Shanxi-Xinghualing/1365/2019	WHO Chinese National Influenza Center	WHO Chinese National Influenza Center	Xiaoxu,Zeng;Xiyan,Li;Weijuan,Huang;Lei,Yang;Dayan,Wang;Yuelong,Shu
EPI_ISL_367178	Asia / China / Jiangxi	2019-02-13	B/Jiangxi-Donghu/1358/2019	WHO Chinese National Influenza Center	WHO Chinese National Influenza Center	Xiaoxu,Zeng;Xiyan,Li;Weijuan,Huang;Lei,Yang;Dayan,Wang;Yuelong,Shu
EPI_ISL_367179	Asia / China / Jiangxi	2019-02-25	B/Jiangxi-Yuanzhou/1336/2019	WHO Chinese National Influenza Center	WHO Chinese National Influenza Center	Xiaoxu,Zeng;Xiyan,Li;Weijuan,Huang;Lei,Yang;Dayan,Wang;Yuelong,Shu
EPI_ISL_367180	Asia / China / Gansu	2019-02-11	B/Gansu-Chengguan/1295/2019	WHO Chinese National Influenza Center	WHO Chinese National Influenza Center	Xiaoxu,Zeng;Xiyan,Li;Weijuan,Huang;Lei,Yang;Dayan,Wang;Yuelong,Shu
EPI_ISL_367181	Asia / China / Qinghai	2019-02-11	B/Qinghai-Chengbei/1109/2019	WHO Chinese National Influenza Center	WHO Chinese National Influenza Center	Xiaoxu,Zeng;Xiyan,Li;Weijuan,Huang;Lei,Yang;Dayan,Wang;Yuelong,Shu
EPI_ISL_367182	Asia / China / Qinghai	2019-02-19	B/Qinghai-Delingha/1161/2019	WHO Chinese National Influenza Center	WHO Chinese National Influenza Center	Xiaoxu,Zeng;Xiyan,Li;Weijuan,Huang;Lei,Yang;Dayan,Wang;Yuelong,Shu
EPI_ISL_367183	Asia / China / Chongqing	2019-02-19	B/Chongqing-Yuzhong/1321/2019	WHO Chinese National Influenza Center	WHO Chinese National Influenza Center	Xiaoxu,Zeng;Xiyan,Li;Weijuan,Huang;Lei,Yang;Dayan,Wang;Yuelong,Shu
EPI_ISL_367184	Asia / China / Hubei	2019-02-15	B/Hubei-Zengdou/1164/2019	WHO Chinese National Influenza Center	WHO Chinese National Influenza Center	Xiaoxu,Zeng;Xiyan,Li;Weijuan,Huang;Lei,Yang;Dayan,Wang;Yuelong,Shu
EPI_ISL_367185	Asia / China / Shanghai	2019-01-25	B/Shanghai-Huangpu/1146/2019	WHO Chinese National Influenza Center	WHO Chinese National Influenza Center	Xiaoxu,Zeng;Xiyan,Li;Weijuan,Huang;Lei,Yang;Dayan,Wang;Yuelong,Shu
EPI_ISL_367186	Asia / China / Shanghai	2019-01-25	B/Shanghai-Huangpu/1146/2019	WHO Chinese National Influenza Center	WHO Chinese National Influenza Center	Xiaoxu,Zeng;Xiyan,Li;Weijuan,Huang;Lei,Yang;Dayan,Wang;Yuelong,Shu
EPI_ISL_367187	Asia / China / Shandong	2019-02-25	B/Shandong-Decheng/1394/2019	WHO Chinese National Influenza Center	WHO Chinese National Influenza Center	Xiaoxu,Zeng;Xiyan,Li;Weijuan,Huang;Lei,Yang;Dayan,Wang;Yuelong,Shu
EPI_ISL_367188	Asia / China / Shandong	2019-02-25	B/Shandong-Decheng/1394/2019	WHO Chinese National Influenza Center	WHO Chinese National Influenza Center	Xiaoxu,Zeng;Xiyan,Li;Weijuan,Huang;Lei,Yang;Dayan,Wang;Yuelong,Shu
EPI_ISL_367189	Asia / China / Shanghai	2019-02-25	B/Shanghai-Changning/1228/2019	WHO Chinese National Influenza Center	WHO Chinese National Influenza Center	Xiaoxu,Zeng;Xiyan,Li;Weijuan,Huang;Lei,Yang;Dayan,Wang;Yuelong,Shu
EPI_ISL_367190	Asia / China / Guizhou	2019-02-21	B/Guizhou-Huichuan/1150/2019	WHO Chinese National Influenza Center	WHO Chinese National Influenza Center	Xiaoxu,Zeng;Xiyan,Li;Weijuan,Huang;Lei,Yang;Dayan,Wang;Yuelong,Shu
EPI_ISL_367191	Asia / China / Hebei	2019-03-05	B/Hebei-Luquan/1179/2019	WHO Chinese National Influenza Center	WHO Chinese National Influenza Center	Xiaoxu,Zeng;Xiyan,Li;Weijuan,Huang;Lei,Yang;Dayan,Wang;Yuelong,Shu
EPI_ISL_367192	Asia / China / Hebei	2019-03-05	B/Hebei-Luquan/1179/2019	WHO Chinese National Influenza Center	WHO Chinese National Influenza Center	Xiaoxu,Zeng;Xiyan,Li;Weijuan,Huang;Lei,Yang;Dayan,Wang;Yuelong,Shu
EPI_ISL_367193	Asia / China / Guizhou	2019-02-21	B/Guizhou-Huichuan/1150/2019	WHO Chinese National Influenza Center	WHO Chinese National Influenza Center	Xiaoxu,Zeng;Xiyan,Li;Weijuan,Huang;Lei,Yang;Dayan,Wang;Yuelong,Shu
EPI_ISL_367194	Asia / China / Shanghai	2019-02-25	B/Shanghai-Changning/1228/2019	WHO Chinese National Influenza Center	WHO Chinese National Influenza Center	Xiaoxu,Zeng;Xiyan,Li;Weijuan,Huang;Lei,Yang;Dayan,Wang;Yuelong,Shu
EPI_ISL_367195	Asia / China / Hunan	2019-03-04	B/Hunan-Lusong/1201/2019	WHO Chinese National Influenza Center	WHO Chinese National Influenza Center	Xiaoxu,Zeng;Xiyan,Li;Weijuan,Huang;Lei,Yang;Dayan,Wang;Yuelong,Shu
EPI_ISL_367196	Asia / China / Hunan	2019-03-05	B/Hunan-Yanfeng/1195/2019	WHO Chinese National Influenza Center	WHO Chinese National Influenza Center	Xiaoxu,Zeng;Xiyan,Li;Weijuan,Huang;Lei,Yang;Dayan,Wang;Yuelong,Shu
EPI_ISL_367197	Asia / China / Guangdong	2019-03-04	B/Guangdong-Leizhou/38/2019	WHO Chinese National Influenza Center	WHO Chinese National Influenza Center	Xiaoxu,Zeng;Xiyan,Li;Weijuan,Huang;Lei,Yang;Dayan,Wang;Yuelong,Shu
EPI_ISL_367198	Asia / China / Zhejiang	2019-03-06	B/Zhejiang-Wuxin/1221/2019	WHO Chinese National Influenza Center	WHO Chinese National Influenza Center	Xiaoxu,Zeng;Xiyan,Li;Weijuan,Huang;Lei,Yang;Dayan,Wang;Yuelong,Shu
EPI_ISL_367199	Asia / China / Hebei	2019-03-04	B/Hebei-Haigang/1197/2019	WHO Chinese National Influenza Center	WHO Chinese National Influenza Center	Xiaoxu,Zeng;Xiyan,Li;Weijuan,Huang;Lei,Yang;Dayan,Wang;Yuelong,Shu
EPI_ISL_367200	Asia / China / Gansu	2019-03-07	B/Gansu-Dunhuang/1231/2019	WHO Chinese National Influenza Center	WHO Chinese National Influenza Center	Xiaoxu,Zeng;Xiyan,Li;Weijuan,Huang;Lei,Yang;Dayan,Wang;Yuelong,Shu
EPI_ISL_367201	Asia / China / Gansu	2019-03-18	B/Gansu-Chengguan/1485/2019	WHO Chinese National Influenza Center	WHO Chinese National Influenza Center	Xiaoxu,Zeng;Xiyan,Li;Weijuan,Huang;Lei,Yang;Dayan,Wang;Yuelong,Shu
EPI_ISL_367202	Asia / China / Guizhou	2019-03-11	B/Guizhou-Pingba/35/2019	WHO Chinese National Influenza Center	WHO Chinese National Influenza Center	Xiaoxu,Zeng;Xiyan,Li;Weijuan,Huang;Lei,Yang;Dayan,Wang;Yuelong,Shu
EPI_ISL_367203	Asia / China / Liaoning	2019-03-04	B/Liaoning-Xigang/1374/2019	WHO Chinese National Influenza Center	WHO Chinese National Influenza Center	Xiaoxu,Zeng;Xiyan,Li;Weijuan,Huang;Lei,Yang;Dayan,Wang;Yuelong,Shu
EPI_ISL_367204	Asia / China / Fujian	2019-03-05	B/Fujian-Tongan/1181/2019	WHO Chinese National Influenza Center	WHO Chinese National Influenza Center	Xiaoxu,Zeng;Xiyan,Li;Weijuan,Huang;Lei,Yang;Dayan,Wang;Yuelong,Shu
EPI_ISL_367205	Asia / China / Sichuan	2019-02-13	B/Sichuan-Jingyang/1393/2019	WHO Chinese National Influenza Center	WHO Chinese National Influenza Center	Xiaoxu,Zeng;Xiyan,Li;Weijuan,Huang;Lei,Yang;Dayan,Wang;Yuelong,Shu
EPI_ISL_367206	Asia / China / Guangdong	2019-02-21	B/Guangdong-Chikan/1147/2019	WHO Chinese National Influenza Center	WHO Chinese National Influenza Center	Xiaoxu,Zeng;Xiyan,Li;Weijuan,Huang;Lei,Yang;Dayan,Wang;Yuelong,Shu
EPI_ISL_367338	Asia / China / Zhejiang	2019-05-20	B/Zhejiang-Wuxin/1431/2019	WHO Chinese National Influenza Center	WHO Chinese National Influenza Center	Xiaoxu,Zeng;Xiyan,Li;Weijuan,Huang;Lei,Yang;Dayan,Wang
EPI_ISL_367339	Asia / China / Hubei	2019-05-21	B/Hubei-Huangshigang/1506/2019	WHO Chinese National Influenza Center	WHO Chinese National Influenza Center	Xiaoxu,Zeng;Xiyan,Li;Weijuan,Huang;Lei,Yang;Dayan,Wang
EPI_ISL_367340	Asia / China / Neimenggu	2019-05-28	B/Neimenggu-Kundoulun/1354/2019	WHO Chinese National Influenza Center	WHO Chinese National Influenza Center	Xiaoxu,Zeng;Xiyan,Li;Weijuan,Huang;Lei,Yang;Dayan,Wang
EPI_ISL_367341	Asia / China / Shanghai	2019-05-27	B/Shanghai-Changning/1583/2019	WHO Chinese National Influenza Center	WHO Chinese National Influenza Center	Xiaoxu,Zeng;Xiyan,Li;Weijuan,Huang;Lei,Yang;Dayan,Wang
EPI_ISL_367342	Asia / China / Guizhou	2019-05-27	B/Guizhou-Honghuagang/1438/2019	WHO Chinese National Influenza Center	WHO Chinese National Influenza Center	Xiaoxu,Zeng;Xiyan,Li;Weijuan,Huang;Lei,Yang;Dayan,Wang
EPI_ISL_367343	Asia / China / Hunan	2019-05-12	B/Hunan-Hecheng/1621/2019	WHO Chinese National Influenza Center	WHO Chinese National Influenza Center	Xiaoxu,Zeng;Xiyan,Li;Weijuan,Huang;Lei,Yang;Dayan,Wang
EPI_ISL_367344	Asia / China / Zhejiang	2019-05-20	B/Zhejiang-Nanhu/1415/2019	WHO Chinese National Influenza Center	WHO Chinese National Influenza Center	Xiaoxu,Zeng;Xiyan,Li;Weijuan,Huang;Lei,Yang;Dayan,Wang
EPI_ISL_367398	Asia / China / Sichuan	2019-02-21	B/Sichuan-Jiangyang/1328/2019	WHO Chinese National Influenza Center	WHO Chinese National Influenza Center	Xiaoxu,Zeng;Xiyan,Li;Weijuan,Huang;Lei,Yang;Dayan,Wang
EPI_ISL_367399	Asia / China / Guizhou	2019-03-13	B/Guizhou-Zhenyuan/33/2019	WHO Chinese National Influenza Center	WHO Chinese National Influenza Center	Xiaoxu,Zeng;Xiyan,Li;Weijuan,Huang;Lei,Yang;Dayan,Wang
EPI_ISL_367400	Asia / China / Jiangxi	2019-03-10	B/Jiangxi-Zhushan/1193/2019	WHO Chinese National Influenza Center	WHO Chinese National Influenza Center	Xiaoxu,Zeng;Xiyan,Li;Weijuan,Huang;Lei,Yang;Dayan,Wang
EPI_ISL_367401	Asia / China / Heilongjiang	2019-03-07	B/Heilongjiang-Aihui/1264/2019	WHO Chinese National Influenza Center	WHO Chinese National Influenza Center	Xiaoxu,Zeng;Xiyan,Li;Weijuan,Huang;Lei,Yang;Dayan,Wang
EPI_ISL_367402	Asia / China / Heilongjiang	2019-03-13	B/Heilongjiang-Hailin/1212/2019	WHO Chinese National Influenza Center	WHO Chinese National Influenza Center	Xiaoxu,Zeng;Xiyan,Li;Weijuan,Huang;Lei,Yang;Dayan,Wang
EPI_ISL_367403	Asia / China / Jiangxi	2019-03-13	B/Jiangxi-Donghu/1548/2019	WHO Chinese National Influenza Center	WHO Chinese National Influenza Center	Xiaoxu,Zeng;Xiyan,Li;Weijuan,Huang;Lei,Yang;Dayan,Wang
EPI_ISL_367404	Asia / China / Shanxi	2019-04-01	B/Shanxi-Xinghualing/1661/2019	WHO Chinese National Influenza Center	WHO Chinese National Influenza Center	Xiaoxu,Zeng;Xiyan,Li;Weijuan,Huang;Lei,Yang;Dayan,Wang
EPI_ISL_367405	Asia / China / Yunnan	2019-04-22	B/Yunnan-Anning/1293/2019	WHO Chinese National Influenza Center	WHO Chinese National Influenza Center	Xiaoxu,Zeng;Xiyan,Li;Weijuan,Huang;Lei,Yang;Dayan,Wang
EPI_ISL_367406	Asia / China / Shanxi	2019-04-01	B/Shanxi-Lishi/1294/2019	WHO Chinese National Influenza Center	WHO Chinese National Influenza Center	Xiaoxu,Zeng;Xiyan,Li;Weijuan,Huang;Lei,Yang;Dayan,Wang
EPI_ISL_367407	Asia / China / Shanghai	2019-04-16	B/Shanghai-Jiading/1313/2019	WHO Chinese National Influenza Center	WHO Chinese National Influenza Center	Xiaoxu,Zeng;Xiyan,Li;Weijuan,Huang;Lei,Yang;Dayan,Wang
EPI_ISL_367408	Asia / China / Hunan	2019-04-29	B/Hunan-Xiangtan/1519/2019	WHO Chinese National Influenza Center	WHO Chinese National Influenza Center	Xiaoxu,Zeng;Xiyan,Li;Weijuan,Huang;Lei,Yang;Dayan,Wang
EPI_ISL_367409	Asia / China / Fujian	2019-04-22	B/Fujian-Xiangcheng/366/2019	WHO Chinese National Influenza Center	WHO Chinese National Influenza Center	Xiaoxu,Zeng;Xiyan,Li;Weijuan,Huang;Lei,Yang;Dayan,Wang
EPI_ISL_367410	Asia / China / Hunan	2019-04-22	B/Hunan-Yongding/37/2019	WHO Chinese National Influenza Center	WHO Chinese National Influenza Center	Xiaoxu,Zeng;Xiyan,Li;Weijuan,Huang;Lei,Yang;Dayan,Wang
EPI_ISL_367411	Asia / China / Guizhou	2019-04-22	B/Guizhou-Kaili/1346/2019	WHO Chinese National Influenza Center	WHO Chinese National Influenza Center	Xiaoxu,Zeng;Xiyan,Li;Weijuan,Huang;Lei,Yang;Dayan,Wang
EPI_ISL_367412	Asia / China / Henan	2019-04-29	B/Henan-Chuanhui/1333/2019	WHO Chinese National Influenza Center	WHO Chinese National Influenza Center	Xiaoxu,Zeng;Xiyan,Li;Weijuan,Huang;Lei,Yang;Dayan,Wang
EPI_ISL_367413	Asia / China / Guangxi	2019-04-23	B/Guangxi-Babu/1418/2019	WHO Chinese National Influenza Center	WHO Chinese National Influenza Center	Xiaoxu,Zeng;Xiyan,Li;Weijuan,Huang;Lei,Yang;Dayan,Wang
EPI_ISL_367414	Asia / China / Chongqing	2019-05-06	B/Chongqing-Yuzhong/1810/2019	WHO Chinese National Influenza Center	WHO Chinese National Influenza Center	Xiaoxu,Zeng;Xiyan,Li;Weijuan,Huang;Lei,Yang;Dayan,Wang
EPI_ISL_367415	Asia / China / Hubei	2019-04-18	B/Hubei-Huangshigang/1420/2019	WHO Chinese National Influenza Center	WHO Chinese National Influenza Center	Xiaoxu,Zeng;Xiyan,Li;Weijuan,Huang;Lei,Yang;Dayan,Wang
EPI_ISL_367416	Asia / China / Hebei	2019-04-15	B/Hebei-Luquan/89/2019	WHO Chinese National Influenza Center	WHO Chinese National Influenza Center	Xiaoxu,Zeng;Xiyan,Li;Weijuan,Huang;Lei,Yang;Dayan,Wang
EPI_ISL_367417	Asia / China / Jiangxi	2019-05-07	B/Jiangxi-Jizhou/1373/2019	WHO Chinese National Influenza Center	WHO Chinese National Influenza Center	Xiaoxu,Zeng;Xiyan,Li;Weijuan,Huang;Lei,Yang;Dayan,Wang
EPI_ISL_367418	Asia / China / Jiangxi	2019-04-22	B/Jiangxi-Zhushan/1318/2019	WHO Chinese National Influenza Center	WHO Chinese National Influenza Center	Xiaoxu,Zeng;Xiyan,Li;Weijuan,Huang;Lei,Yang;Dayan,Wang
EPI_ISL_367419	Asia / China / Guangdong	2019-05-07	B/Guangdong-Duanzhou/1420/2019	WHO Chinese National Influenza Center	WHO Chinese National Influenza Center	Xiaoxu,Zeng;Xiyan,Li;Weijuan,Huang;Lei,Yang;Dayan,Wang
EPI_ISL_367420	Asia / China / Jiangxi	2019-04-22	B/Jiangxi-Xunyang/1406/2019	WHO Chinese National Influenza Center	WHO Chinese National Influenza Center	Xiaoxu,Zeng;Xiyan,Li;Weijuan,Huang;Lei,Yang;Dayan,Wang
EPI_ISL_367421	Asia / China / Neimenggu	2019-03-11	B/Neimenggu-Donghe/1260/2019	WHO Chinese National Influenza Center	WHO Chinese National Influenza Center	Xiaoxu,Zeng;Xiyan,Li;Weijuan,Huang;Lei,Yang;Dayan,Wang
EPI_ISL_367422	Asia / China / Guangdong	2019-04-15	B/Guangdong-Chikan/1309/2019	WHO Chinese National Influenza Center	WHO Chinese National Influenza Center	Xiaoxu,Zeng;Xiyan,Li;Weijuan,Huang;Lei,Yang;Dayan,Wang
EPI_ISL_367423	Asia / China / Hubei	2019-05-13	B/Hubei-Huangzhou/1412/2019	WHO Chinese National Influenza Center	WHO Chinese National Influenza Center	Xiaoxu,Zeng;Xiyan,Li;Weijuan,Huang;Lei,Yang;Dayan,Wang
EPI_ISL_367424	Asia / China / Liaoning	2019-04-01	B/Liaoning-Xinlongtai/313/2019	WHO Chinese National Influenza Center	WHO Chinese National Influenza Center	Xiaoxu,Zeng;Xiyan,Li;Weijuan,Huang;Lei,Yang;Dayan,Wang
EPI_ISL_367481	Asia / China	2019-04-27	B/KANAGAWA/IC18169/2019	WHO Chinese National Influenza Center	WHO Chinese National Influenza Center	Xiaoxu,Zeng;Xiyan,Li;Weijuan,Huang;Lei,Yang;Dayan,Wang
EPI_ISL_367482	Asia / China	2019-02-08	B/KANAGAWA/AC1867/2019	WHO Chinese National Influenza Center	WHO Chinese National Influenza Center	Xiaoxu,Zeng;Xiyan,Li;Weijuan,Huang;Lei,Yang;Dayan,Wang
EPI_ISL_367729	Oceania / Australia / Victoria / Wollert	2019-06-18	B/Victoria/935/2019	Royal Chidrens Hospital	WHO Collaborating Centre for Reference and Research on Influenza	Deng,Y-M; Iannello,P; Lau,H; Todd,A; Spirason,N; Komadina,N.
EPI_ISL_368226	North America / United States / Arizona	2019-06-25	B/Arizona/15/2019	Arizona Department of Health Services	Centers for Disease Control and Prevention	NA
EPI_ISL_368234	North America / United States / Hawaii	2019-06-15	B/Hawaii/28/2019	State of Hawaii Department of Health	Centers for Disease Control and Prevention	NA
EPI_ISL_368237	North America / United States / Louisiana	2019-06-25	B/Louisiana/22/2019	Louisiana Department of Health and Hospitals	Centers for Disease Control and Prevention	NA
EPI_ISL_368239	North America / United States / Florida	2019-06-13	B/Florida/32/2019	Florida Department of Health-Jacksonville	Centers for Disease Control and Prevention	NA
EPI_ISL_368240	North America / United States / Florida	2019-06-22	B/Florida/33/2019	Florida Department of Health-Tampa	Centers for Disease Control and Prevention	NA
EPI_ISL_370366	Asia / Japan	2019-06-21	B/KANAGAWA/AC1885/2019	National Institute of Infectious Diseases (NIID)	National Institute of Infectious Diseases (NIID)	Kuwahara,Tomoko;Takashita,Emi;Fujisaki,Seiichiro;Shirakura,Masayuki;Watanabe,Shinji;Odagiri,Takato
EPI_ISL_370367	Asia / Japan	2019-06-21	B/KANAGAWA/AC1886/2019	National Institute of Infectious Diseases (NIID)	National Institute of Infectious Diseases (NIID)	Kuwahara,Tomoko;Takashita,Emi;Fujisaki,Seiichiro;Shirakura,Masayuki;Watanabe,Shinji;Odagiri,Takato
EPI_ISL_3722681	Asia / China	2021-06-03	B/Shanghai-Huangpu/1825/2021	WHO Chinese National Influenza Center	WHO Chinese National Influenza Center	Zeng xiaoxu, Li Xiyan, Huang Weijuan, Dayan Wang
EPI_ISL_3722682	Asia / China / Chongqing	2021-06-14	B/Chongqing-Qianjiang/1568/2021	WHO Chinese National Influenza Center	WHO Chinese National Influenza Center	Zeng xiaoxu, Li Xiyan, Huang Weijuan, Dayan Wang
EPI_ISL_3722683	Asia / China / Sichuan	2021-06-29	B/Sichuan-Gaoxin/1701/2021	WHO Chinese National Influenza Center	WHO Chinese National Influenza Center	Zeng xiaoxu, Li Xiyan, Huang Weijuan, Dayan Wang
EPI_ISL_3722684	Asia / China / Sichuan	2021-06-29	B/Sichuan-Gaoxin/1701/2021	WHO Chinese National Influenza Center	WHO Chinese National Influenza Center	Zeng xiaoxu, Li Xiyan, Huang Weijuan, Dayan Wang
EPI_ISL_3722685	Asia / China / Tianjin	2021-06-01	B/Tianjin-Jinnan/1305/2021	WHO Chinese National Influenza Center	WHO Chinese National Influenza Center	Zeng xiaoxu, Li Xiyan, Huang Weijuan, Dayan Wang
EPI_ISL_3722686	Asia / China / Fujian	2021-06-20	B/Fujian-Cangshan/1613/2021	WHO Chinese National Influenza Center	WHO Chinese National Influenza Center	Zeng xiaoxu, Li Xiyan, Huang Weijuan, Dayan Wang
EPI_ISL_3722687	Asia / China / Zhejiang	2021-06-21	B/Zhejiang-Haishu/11220/2021	WHO Chinese National Influenza Center	WHO Chinese National Influenza Center	Zeng xiaoxu, Li Xiyan, Huang Weijuan, Dayan Wang
EPI_ISL_3722688	Asia / China / Ningxia	2021-04-19	B/Ningxia-Zhongning/1308/2021	WHO Chinese National Influenza Center	WHO Chinese National Influenza Center	Zeng xiaoxu, Li Xiyan, Huang Weijuan, Dayan Wang
EPI_ISL_3722689	Asia / China / Gansu	2021-05-25	B/Gansu-Jingyuan/1410/2021	WHO Chinese National Influenza Center	WHO Chinese National Influenza Center	Zeng xiaoxu, Li Xiyan, Huang Weijuan, Dayan Wang
EPI_ISL_3722690	Asia / China / Sichuan	2021-06-09	B/Sichuan-Qingyang/11361/2021	WHO Chinese National Influenza Center	WHO Chinese National Influenza Center	Zeng xiaoxu, Li Xiyan, Huang Weijuan, Dayan Wang
EPI_ISL_3722691	Asia / China / Sichuan	2021-06-09	B/Sichuan-Qingyang/11361/2021	WHO Chinese National Influenza Center	WHO Chinese National Influenza Center	Zeng xiaoxu, Li Xiyan, Huang Weijuan, Dayan Wang
EPI_ISL_3722692	Asia / China / Hebei	2021-06-08	B/Hebei-Luquan/1578/2021	WHO Chinese National Influenza Center	WHO Chinese National Influenza Center	Zeng xiaoxu, Li Xiyan, Huang Weijuan, Dayan Wang
EPI_ISL_3722693	Asia / China	2021-06-07	B/Henan-Jinshui/1318/2021	WHO Chinese National Influenza Center	WHO Chinese National Influenza Center	Zeng xiaoxu, Li Xiyan, Huang Weijuan, Dayan Wang
EPI_ISL_3722694	Asia / China / Hubei	2021-06-07	B/Hubei-Jiangan/1555/2021	WHO Chinese National Influenza Center	WHO Chinese National Influenza Center	Zeng xiaoxu, Li Xiyan, Huang Weijuan, Dayan Wang
EPI_ISL_3722695	Asia / China / Hubei	2021-06-07	B/Hubei-Jiangan/1555/2021	WHO Chinese National Influenza Center	WHO Chinese National Influenza Center	Zeng xiaoxu, Li Xiyan, Huang Weijuan, Dayan Wang
EPI_ISL_3722696	Asia / China / Zhejiang	2021-06-02	B/Zhejiang-Nanhu/1526/2021	WHO Chinese National Influenza Center	WHO Chinese National Influenza Center	Zeng xiaoxu, Li Xiyan, Huang Weijuan, Dayan Wang
EPI_ISL_3722697	Asia / China / Zhejiang	2021-06-09	B/Zhejiang-Yuecheng/1693/2021	WHO Chinese National Influenza Center	WHO Chinese National Influenza Center	Zeng xiaoxu, Li Xiyan, Huang Weijuan, Dayan Wang
EPI_ISL_3722698	Asia / China / Gansu	2021-06-07	B/Gansu-Jiayuguan/1449/2021	WHO Chinese National Influenza Center	WHO Chinese National Influenza Center	Zeng xiaoxu, Li Xiyan, Huang Weijuan, Dayan Wang
EPI_ISL_3722699	Asia / China / Gansu	2021-06-06	B/Gansu-Suzhou/1447/2021	WHO Chinese National Influenza Center	WHO Chinese National Influenza Center	Zeng xiaoxu, Li Xiyan, Huang Weijuan, Dayan Wang
EPI_ISL_3722700	Asia / China / Beijing	2021-06-01	B/Beijing-Chaoyang/11280/2021	WHO Chinese National Influenza Center	WHO Chinese National Influenza Center	Zeng xiaoxu, Li Xiyan, Huang Weijuan, Dayan Wang
EPI_ISL_3722701	Asia / China / Shanxi	2021-06-02	B/Shanxi-Chengqu/1390/2021	WHO Chinese National Influenza Center	WHO Chinese National Influenza Center	Zeng xiaoxu, Li Xiyan, Huang Weijuan, Dayan Wang
EPI_ISL_3722702	Asia / China / Neimenggu	2021-06-08	B/Neimenggu-Xincheng/1370/2021	WHO Chinese National Influenza Center	WHO Chinese National Influenza Center	Zeng xiaoxu, Li Xiyan, Huang Weijuan, Dayan Wang
EPI_ISL_3722703	Asia / China / Neimenggu	2021-06-08	B/Neimenggu-Xincheng/1370/2021	WHO Chinese National Influenza Center	WHO Chinese National Influenza Center	Zeng xiaoxu, Li Xiyan, Huang Weijuan, Dayan Wang
EPI_ISL_3722705	Asia / China / Fujian	2021-05-26	B/Fujian-Meilie/1540/2021	WHO Chinese National Influenza Center	WHO Chinese National Influenza Center	Zeng xiaoxu, Li Xiyan, Huang Weijuan, Dayan Wang
EPI_ISL_3722707	Asia / China / Fujian	2021-06-01	B/Fujian-Sanyuan/2541/2021	WHO Chinese National Influenza Center	WHO Chinese National Influenza Center	Zeng xiaoxu, Li Xiyan, Huang Weijuan, Dayan Wang
EPI_ISL_3722708	Asia / China / Guizhou	2021-06-16	B/Guizhou-Songtaomiaozuzizhi/346/2021	WHO Chinese National Influenza Center	WHO Chinese National Influenza Center	Zeng xiaoxu, Li Xiyan, Huang Weijuan, Dayan Wang
EPI_ISL_3722709	Asia / China	2021-06-07	B/Henan-Jinshui/1318/2021	WHO Chinese National Influenza Center	WHO Chinese National Influenza Center	Zeng xiaoxu, Li Xiyan, Huang Weijuan, Dayan Wang
EPI_ISL_3722710	Asia / China / Guangdong	2021-06-16	B/Guangdong-Zhenjiang/1485/2021	WHO Chinese National Influenza Center	WHO Chinese National Influenza Center	Zeng xiaoxu, Li Xiyan, Huang Weijuan, Dayan Wang
EPI_ISL_3722711	Asia / China / Guangdong	2021-06-15	B/Guangdong-Xiangzhou/8244/2021	WHO Chinese National Influenza Center	WHO Chinese National Influenza Center	Zeng xiaoxu, Li Xiyan, Huang Weijuan, Dayan Wang
EPI_ISL_3722713	Asia / China / Shanghai	2021-06-15	B/Shanghai-Qingpu/1470/2021	WHO Chinese National Influenza Center	WHO Chinese National Influenza Center	Zeng xiaoxu, Li Xiyan, Huang Weijuan, Dayan Wang
EPI_ISL_3722714	Asia / China / Shanghai	2021-06-14	B/Shanghai-Jiading/1473/2021	WHO Chinese National Influenza Center	WHO Chinese National Influenza Center	Zeng xiaoxu, Li Xiyan, Huang Weijuan, Dayan Wang
EPI_ISL_3722715	Asia / China / Hubei	2021-06-08	B/Hubei-Tongcheng/2145/2021	WHO Chinese National Influenza Center	WHO Chinese National Influenza Center	Zeng xiaoxu, Li Xiyan, Huang Weijuan, Dayan Wang
EPI_ISL_3722716	Asia / China / Hubei	2021-06-14	B/Hubei-Qiaokou/1425/2021	WHO Chinese National Influenza Center	WHO Chinese National Influenza Center	Zeng xiaoxu, Li Xiyan, Huang Weijuan, Dayan Wang
EPI_ISL_3722717	Asia / China / Hubei	2021-06-27	B/Hubei-Dongxihu/2233/2021	WHO Chinese National Influenza Center	WHO Chinese National Influenza Center	Zeng xiaoxu, Li Xiyan, Huang Weijuan, Dayan Wang
EPI_ISL_3722719	Asia / China / Gansu	2021-04-13	B/Gansu-Baiyin/1281/2021	WHO Chinese National Influenza Center	WHO Chinese National Influenza Center	Zeng xiaoxu, Li Xiyan, Huang Weijuan, Dayan Wang
EPI_ISL_3722720	Asia / China / Gansu	2021-03-09	B/Gansu-Chengguan/1407/2021	WHO Chinese National Influenza Center	WHO Chinese National Influenza Center	Zeng xiaoxu, Li Xiyan, Huang Weijuan, Dayan Wang
EPI_ISL_3722721	Asia / China / Gansu	2021-03-30	B/Gansu-Baiyin/1246/2021	WHO Chinese National Influenza Center	WHO Chinese National Influenza Center	Zeng xiaoxu, Li Xiyan, Huang Weijuan, Dayan Wang
EPI_ISL_3722722	Asia / China / Gansu	2021-03-11	B/Gansu-Wudou/1280/2021	WHO Chinese National Influenza Center	WHO Chinese National Influenza Center	Zeng xiaoxu, Li Xiyan, Huang Weijuan, Dayan Wang
EPI_ISL_3722723	Asia / China / Gansu	2021-03-22	B/Gansu-Wudou/1348/2021	WHO Chinese National Influenza Center	WHO Chinese National Influenza Center	Zeng xiaoxu, Li Xiyan, Huang Weijuan, Dayan Wang
EPI_ISL_3722724	Asia / China / Gansu	2021-03-15	B/Gansu-Wudou/1312/2021	WHO Chinese National Influenza Center	WHO Chinese National Influenza Center	Zeng xiaoxu, Li Xiyan, Huang Weijuan, Dayan Wang
EPI_ISL_3722725	Asia / China / Gansu	2021-03-31	B/Gansu-Qinzhou/1256/2021	WHO Chinese National Influenza Center	WHO Chinese National Influenza Center	Zeng xiaoxu, Li Xiyan, Huang Weijuan, Dayan Wang
EPI_ISL_3722726	Asia / China / Gansu	2021-03-30	B/Gansu-Baiyin/1246/2021	WHO Chinese National Influenza Center	WHO Chinese National Influenza Center	Zeng xiaoxu, Li Xiyan, Huang Weijuan, Dayan Wang
EPI_ISL_3722727	Asia / China / Gansu	2021-03-10	B/Gansu-Anding/1194/2021	WHO Chinese National Influenza Center	WHO Chinese National Influenza Center	Zeng xiaoxu, Li Xiyan, Huang Weijuan, Dayan Wang
EPI_ISL_3722728	Asia / China / Gansu	2021-03-12	B/Gansu-Wudou/1305/2021	WHO Chinese National Influenza Center	WHO Chinese National Influenza Center	Zeng xiaoxu, Li Xiyan, Huang Weijuan, Dayan Wang
EPI_ISL_3722729	Asia / China / Gansu	2021-03-15	B/Gansu-Minxian/330/2021	WHO Chinese National Influenza Center	WHO Chinese National Influenza Center	Zeng xiaoxu, Li Xiyan, Huang Weijuan, Dayan Wang
EPI_ISL_3722730	Asia / China / Gansu	2021-03-16	B/Gansu-Baiyin/1209/2021	WHO Chinese National Influenza Center	WHO Chinese National Influenza Center	Zeng xiaoxu, Li Xiyan, Huang Weijuan, Dayan Wang
EPI_ISL_3722731	Asia / China / Gansu	2021-03-17	B/Gansu-Jingyuan/1211/2021	WHO Chinese National Influenza Center	WHO Chinese National Influenza Center	Zeng xiaoxu, Li Xiyan, Huang Weijuan, Dayan Wang
EPI_ISL_3722732	Asia / China / Gansu	2021-03-22	B/Gansu-Chengguan/1474/2021	WHO Chinese National Influenza Center	WHO Chinese National Influenza Center	Zeng xiaoxu, Li Xiyan, Huang Weijuan, Dayan Wang
EPI_ISL_3722733	Asia / China / Gansu	2021-03-23	B/Gansu-Baiyin/1224/2021	WHO Chinese National Influenza Center	WHO Chinese National Influenza Center	Zeng xiaoxu, Li Xiyan, Huang Weijuan, Dayan Wang
EPI_ISL_3722734	Asia / China / Gansu	2021-03-24	B/Gansu-Jingyuan/1237/2021	WHO Chinese National Influenza Center	WHO Chinese National Influenza Center	Zeng xiaoxu, Li Xiyan, Huang Weijuan, Dayan Wang
EPI_ISL_3722735	Asia / China / Gansu	2021-03-28	B/Gansu-Wudou/1361/2021	WHO Chinese National Influenza Center	WHO Chinese National Influenza Center	Zeng xiaoxu, Li Xiyan, Huang Weijuan, Dayan Wang
EPI_ISL_3722736	Asia / China / Gansu	2021-03-30	B/Gansu-Linxia/1430/2021	WHO Chinese National Influenza Center	WHO Chinese National Influenza Center	Zeng xiaoxu, Li Xiyan, Huang Weijuan, Dayan Wang
EPI_ISL_3722737	Asia / China / Gansu	2021-03-31	B/Gansu-Jingyuan/1261/2021	WHO Chinese National Influenza Center	WHO Chinese National Influenza Center	Zeng xiaoxu, Li Xiyan, Huang Weijuan, Dayan Wang
EPI_ISL_3722738	Asia / China / Gansu	2021-03-31	B/Gansu-Baiyin/1252/2021	WHO Chinese National Influenza Center	WHO Chinese National Influenza Center	Zeng xiaoxu, Li Xiyan, Huang Weijuan, Dayan Wang
EPI_ISL_3722740	Asia / China / Shandong	2021-04-20	B/Shandong-Linshu/312/2021	WHO Chinese National Influenza Center	WHO Chinese National Influenza Center	Zeng xiaoxu, Li Xiyan, Huang Weijuan, Dayan Wang
EPI_ISL_3722741	Asia / China / Shandong	2021-04-20	B/Shandong-Linshu/312/2021	WHO Chinese National Influenza Center	WHO Chinese National Influenza Center	Zeng xiaoxu, Li Xiyan, Huang Weijuan, Dayan Wang
EPI_ISL_3722742	Asia / China / Shandong	2021-04-20	B/Shandong-Linshu/312/2021	WHO Chinese National Influenza Center	WHO Chinese National Influenza Center	Zeng xiaoxu, Li Xiyan, Huang Weijuan, Dayan Wang
EPI_ISL_3722743	Asia / China / Hubei	2021-05-02	B/Hubei-Dongxihu/2144/2021	WHO Chinese National Influenza Center	WHO Chinese National Influenza Center	Zeng xiaoxu, Li Xiyan, Huang Weijuan, Dayan Wang
EPI_ISL_3722744	Asia / China / Hubei	2021-05-02	B/Hubei-Dongxihu/2144/2021	WHO Chinese National Influenza Center	WHO Chinese National Influenza Center	Zeng xiaoxu, Li Xiyan, Huang Weijuan, Dayan Wang
EPI_ISL_3722745	Asia / China / Hubei	2021-05-10	B/Hubei-Qiaokou/1334/2021	WHO Chinese National Influenza Center	WHO Chinese National Influenza Center	Zeng xiaoxu, Li Xiyan, Huang Weijuan, Dayan Wang
EPI_ISL_3722746	Asia / China / Hubei	2021-05-10	B/Hubei-Qiaokou/1334/2021	WHO Chinese National Influenza Center	WHO Chinese National Influenza Center	Zeng xiaoxu, Li Xiyan, Huang Weijuan, Dayan Wang
EPI_ISL_3722747	Asia / China / Guizhou	2021-05-10	B/Guizhou-Bijiang/1379/2021	WHO Chinese National Influenza Center	WHO Chinese National Influenza Center	Zeng xiaoxu, Li Xiyan, Huang Weijuan, Dayan Wang
EPI_ISL_3722748	Asia / China / Shandong	2021-05-13	B/Shandong-Dingtao/321/2021	WHO Chinese National Influenza Center	WHO Chinese National Influenza Center	Zeng xiaoxu, Li Xiyan, Huang Weijuan, Dayan Wang
EPI_ISL_3722749	Asia / China / Sichuan	2021-05-10	B/Sichuan-Qingyang/11117/2021	WHO Chinese National Influenza Center	WHO Chinese National Influenza Center	Zeng xiaoxu, Li Xiyan, Huang Weijuan, Dayan Wang
EPI_ISL_3722750	Asia / China / Yunnan	2021-05-19	B/Yunnan-Mengzi/1670/2021	WHO Chinese National Influenza Center	WHO Chinese National Influenza Center	Zeng xiaoxu, Li Xiyan, Huang Weijuan, Dayan Wang
EPI_ISL_3722751	Asia / China / Shanghai	2021-05-05	B/Shanghai-Jiading/1343/2021	WHO Chinese National Influenza Center	WHO Chinese National Influenza Center	Zeng xiaoxu, Li Xiyan, Huang Weijuan, Dayan Wang
EPI_ISL_3722752	Asia / China / Shandong	2021-04-16	B/Shandong-Wulian/326/2021	WHO Chinese National Influenza Center	WHO Chinese National Influenza Center	Zeng xiaoxu, Li Xiyan, Huang Weijuan, Dayan Wang
EPI_ISL_3722753	Asia / China / Hubei	2021-04-26	B/Hubei-Chongyang/215/2021	WHO Chinese National Influenza Center	WHO Chinese National Influenza Center	Zeng xiaoxu, Li Xiyan, Huang Weijuan, Dayan Wang
EPI_ISL_3722754	Asia / China / Hubei	2021-05-04	B/Hubei-Shishou/268/2021	WHO Chinese National Influenza Center	WHO Chinese National Influenza Center	Zeng xiaoxu, Li Xiyan, Huang Weijuan, Dayan Wang
EPI_ISL_3722755	Asia / China / Hunan	2021-05-21	B/Hunan-Beihu/1841/2021	WHO Chinese National Influenza Center	WHO Chinese National Influenza Center	Zeng xiaoxu, Li Xiyan, Huang Weijuan, Dayan Wang
EPI_ISL_3722756	Asia / China / Hunan	2021-05-05	B/Hunan-Yanfeng/1366/2021	WHO Chinese National Influenza Center	WHO Chinese National Influenza Center	Zeng xiaoxu, Li Xiyan, Huang Weijuan, Dayan Wang
EPI_ISL_3722757	Asia / China / Gansu	2021-05-11	B/Gansu-Maoji/1368/2021	WHO Chinese National Influenza Center	WHO Chinese National Influenza Center	Zeng xiaoxu, Li Xiyan, Huang Weijuan, Dayan Wang
EPI_ISL_3722758	Asia / China / Gansu	2021-05-25	B/Gansu-Maoji/1403/2021	WHO Chinese National Influenza Center	WHO Chinese National Influenza Center	Zeng xiaoxu, Li Xiyan, Huang Weijuan, Dayan Wang
EPI_ISL_3722759	Asia / China	2021-05-10	B/Henan-Zhongyuan/1291/2021	WHO Chinese National Influenza Center	WHO Chinese National Influenza Center	Zeng xiaoxu, Li Xiyan, Huang Weijuan, Dayan Wang
EPI_ISL_3722760	Asia / China	2021-05-10	B/Henan-Zhongyuan/1291/2021	WHO Chinese National Influenza Center	WHO Chinese National Influenza Center	Zeng xiaoxu, Li Xiyan, Huang Weijuan, Dayan Wang
EPI_ISL_3722761	Asia / China / Neimenggu	2021-05-10	B/Neimenggu-Donghe/1394/2021	WHO Chinese National Influenza Center	WHO Chinese National Influenza Center	Zeng xiaoxu, Li Xiyan, Huang Weijuan, Dayan Wang
EPI_ISL_3722762	Asia / China / Neimenggu	2021-05-10	B/Neimenggu-Donghe/1394/2021	WHO Chinese National Influenza Center	WHO Chinese National Influenza Center	Zeng xiaoxu, Li Xiyan, Huang Weijuan, Dayan Wang
EPI_ISL_3722763	Asia / China / Sichuan	2021-05-18	B/Sichuan-Fucheng/1868/2021	WHO Chinese National Influenza Center	WHO Chinese National Influenza Center	Zeng xiaoxu, Li Xiyan, Huang Weijuan, Dayan Wang
EPI_ISL_3722764	Asia / China / Sichuan	2021-05-18	B/Sichuan-Fucheng/1868/2021	WHO Chinese National Influenza Center	WHO Chinese National Influenza Center	Zeng xiaoxu, Li Xiyan, Huang Weijuan, Dayan Wang
EPI_ISL_3722765	Asia / China / Sichuan	2021-05-24	B/Sichuan-Gaoxin/1591/2021	WHO Chinese National Influenza Center	WHO Chinese National Influenza Center	Zeng xiaoxu, Li Xiyan, Huang Weijuan, Dayan Wang
EPI_ISL_3722766	Asia / China / Sichuan	2021-05-24	B/Sichuan-Gaoxin/1591/2021	WHO Chinese National Influenza Center	WHO Chinese National Influenza Center	Zeng xiaoxu, Li Xiyan, Huang Weijuan, Dayan Wang
EPI_ISL_3722767	Asia / China / Hubei	2021-05-24	B/Hubei-Chongyang/286/2021	WHO Chinese National Influenza Center	WHO Chinese National Influenza Center	Zeng xiaoxu, Li Xiyan, Huang Weijuan, Dayan Wang
EPI_ISL_3722768	Asia / China / Hubei	2021-05-24	B/Hubei-Chongyang/286/2021	WHO Chinese National Influenza Center	WHO Chinese National Influenza Center	Zeng xiaoxu, Li Xiyan, Huang Weijuan, Dayan Wang
EPI_ISL_3722769	Asia / China / Hubei	2021-06-01	B/Hubei-Jingzhou/311/2021	WHO Chinese National Influenza Center	WHO Chinese National Influenza Center	Zeng xiaoxu, Li Xiyan, Huang Weijuan, Dayan Wang
EPI_ISL_3722770	Asia / China / Guizhou	2021-05-17	B/Guizhou-Bijiang/1401/2021	WHO Chinese National Influenza Center	WHO Chinese National Influenza Center	Zeng xiaoxu, Li Xiyan, Huang Weijuan, Dayan Wang
EPI_ISL_3722771	Asia / China / Guizhou	2021-05-17	B/Guizhou-Bijiang/1401/2021	WHO Chinese National Influenza Center	WHO Chinese National Influenza Center	Zeng xiaoxu, Li Xiyan, Huang Weijuan, Dayan Wang
EPI_ISL_3722772	Asia / China / Guizhou	2021-05-28	B/Guizhou-Songtaomiaozuzizhi/328/2021	WHO Chinese National Influenza Center	WHO Chinese National Influenza Center	Zeng xiaoxu, Li Xiyan, Huang Weijuan, Dayan Wang
EPI_ISL_3722773	Asia / China / Guizhou	2021-05-28	B/Guizhou-Songtaomiaozuzizhi/328/2021	WHO Chinese National Influenza Center	WHO Chinese National Influenza Center	Zeng xiaoxu, Li Xiyan, Huang Weijuan, Dayan Wang
EPI_ISL_3722774	Asia / China / Shandong	2021-05-25	B/Shandong-Kuiwen/361/2021	WHO Chinese National Influenza Center	WHO Chinese National Influenza Center	Zeng xiaoxu, Li Xiyan, Huang Weijuan, Dayan Wang
EPI_ISL_3722775	Asia / China / Shandong	2021-05-25	B/Shandong-Kuiwen/361/2021	WHO Chinese National Influenza Center	WHO Chinese National Influenza Center	Zeng xiaoxu, Li Xiyan, Huang Weijuan, Dayan Wang
EPI_ISL_3722776	Asia / China / Chongqing	2021-06-07	B/Chongqing-Yuzhong/1513/2021	WHO Chinese National Influenza Center	WHO Chinese National Influenza Center	Zeng xiaoxu, Li Xiyan, Huang Weijuan, Dayan Wang
EPI_ISL_3722777	Asia / China / Fujian	2021-05-26	B/Fujian-Yanping/11232/2021	WHO Chinese National Influenza Center	WHO Chinese National Influenza Center	Zeng xiaoxu, Li Xiyan, Huang Weijuan, Dayan Wang
EPI_ISL_3722778	Asia / China / Liaoning	2021-05-10	B/Liaoning-Huanggu/1776/2021	WHO Chinese National Influenza Center	WHO Chinese National Influenza Center	Zeng xiaoxu, Li Xiyan, Huang Weijuan, Dayan Wang
EPI_ISL_3722779	Asia / China / Gansu	2021-05-20	B/Gansu-Xifeng/1401/2021	WHO Chinese National Influenza Center	WHO Chinese National Influenza Center	Zeng xiaoxu, Li Xiyan, Huang Weijuan, Dayan Wang
EPI_ISL_3722780	Asia / China / Ningxia	2021-06-02	B/Ningxia-Zhongning/1350/2021	WHO Chinese National Influenza Center	WHO Chinese National Influenza Center	Zeng xiaoxu, Li Xiyan, Huang Weijuan, Dayan Wang
EPI_ISL_3722781	Asia / China / Beijing	2021-06-01	B/Beijing-Chaoyang/11296/2021	WHO Chinese National Influenza Center	WHO Chinese National Influenza Center	Zeng xiaoxu, Li Xiyan, Huang Weijuan, Dayan Wang
EPI_ISL_3722782	Asia / China / Ningxia	2021-05-24	B/Ningxia-Zhongning/1344/2021	WHO Chinese National Influenza Center	WHO Chinese National Influenza Center	Zeng xiaoxu, Li Xiyan, Huang Weijuan, Dayan Wang
EPI_ISL_3722783	Asia / China / Gansu	2021-05-26	B/Gansu-Qinzhou/1398/2021	WHO Chinese National Influenza Center	WHO Chinese National Influenza Center	Zeng xiaoxu, Li Xiyan, Huang Weijuan, Dayan Wang
EPI_ISL_3722784	Asia / China / Sichuan	2021-05-07	B/Sichuan-Gaoxin/1534/2021	WHO Chinese National Influenza Center	WHO Chinese National Influenza Center	Zeng xiaoxu, Li Xiyan, Huang Weijuan, Dayan Wang
EPI_ISL_3722785	Asia / China / Jiangxi	2021-05-24	B/Jiangxi-Jizhou/1532/2021	WHO Chinese National Influenza Center	WHO Chinese National Influenza Center	Zeng xiaoxu, Li Xiyan, Huang Weijuan, Dayan Wang
EPI_ISL_3722786	Asia / China / Hebei	2021-05-19	B/Hebei-Xinhua/1494/2021	WHO Chinese National Influenza Center	WHO Chinese National Influenza Center	Zeng xiaoxu, Li Xiyan, Huang Weijuan, Dayan Wang
EPI_ISL_3722787	Asia / China / Sichuan	2021-05-24	B/Sichuan-Fucheng/1882/2021	WHO Chinese National Influenza Center	WHO Chinese National Influenza Center	Zeng xiaoxu, Li Xiyan, Huang Weijuan, Dayan Wang
EPI_ISL_3722788	Asia / China / Guangxi	2021-05-06	B/Guangxi-Fangcheng/1501/2021	WHO Chinese National Influenza Center	WHO Chinese National Influenza Center	Zeng xiaoxu, Li Xiyan, Huang Weijuan, Dayan Wang
EPI_ISL_3722789	Asia / China / Hubei	2021-06-07	B/Hubei-Yuanan/2101/2021	WHO Chinese National Influenza Center	WHO Chinese National Influenza Center	Zeng xiaoxu, Li Xiyan, Huang Weijuan, Dayan Wang
EPI_ISL_3722790	Asia / China / Henan	2021-05-31	B/Henan-Hualong/315/2021	WHO Chinese National Influenza Center	WHO Chinese National Influenza Center	Zeng xiaoxu, Li Xiyan, Huang Weijuan, Dayan Wang
EPI_ISL_3722791	Asia / China / Gansu	2021-04-13	B/Gansu-Baiyin/1281/2021	WHO Chinese National Influenza Center	WHO Chinese National Influenza Center	Zeng xiaoxu, Li Xiyan, Huang Weijuan, Dayan Wang
EPI_ISL_3722792	Asia / China / Gansu	2021-04-06	B/Gansu-Baiyin/1269/2021	WHO Chinese National Influenza Center	WHO Chinese National Influenza Center	Zeng xiaoxu, Li Xiyan, Huang Weijuan, Dayan Wang
EPI_ISL_3722793	Asia / China / Ningxia	2021-05-26	B/Ningxia-Zhongning/1346/2021	WHO Chinese National Influenza Center	WHO Chinese National Influenza Center	Zeng xiaoxu, Li Xiyan, Huang Weijuan, Dayan Wang
EPI_ISL_3722794	Asia / China / Ningxia	2021-06-02	B/Ningxia-Zhongning/1353/2021	WHO Chinese National Influenza Center	WHO Chinese National Influenza Center	Zeng xiaoxu, Li Xiyan, Huang Weijuan, Dayan Wang
EPI_ISL_3722795	Asia / China / Ningxia	2021-04-26	B/Ningxia-Zhongning/1321/2021	WHO Chinese National Influenza Center	WHO Chinese National Influenza Center	Zeng xiaoxu, Li Xiyan, Huang Weijuan, Dayan Wang
EPI_ISL_3722796	Asia / China / Ningxia	2021-05-04	B/Ningxia-Zhongning/1328/2021	WHO Chinese National Influenza Center	WHO Chinese National Influenza Center	Zeng xiaoxu, Li Xiyan, Huang Weijuan, Dayan Wang
EPI_ISL_3722797	Asia / China / Ningxia	2021-05-10	B/Ningxia-Zhongning/1332/2021	WHO Chinese National Influenza Center	WHO Chinese National Influenza Center	Zeng xiaoxu, Li Xiyan, Huang Weijuan, Dayan Wang
EPI_ISL_372956	South America / Brazil / Estado de Sao Paulo / Sao Paulo	2019-07-07	B/Sao Paulo/1211465-IAL/2019	Instituto Adolfo Lutz	Instituto Adolfo Lutz	Santos,Katia;Silva,Daniela;Benega,Margarete;Santos,Cecilia;Paiva,Terezinha
EPI_ISL_377018	Asia / China / Jiangsu	2019-06-06	B/Jiangsu-Haizhou/3214/2019	WHO Chinese National Influenza Center	WHO Chinese National Influenza Center	Xiaoxu,Zeng;Xiyan,Li;Weijuan,Huang;Lei,Yang;Dayan,Wang
EPI_ISL_377019	Asia / China / Fujian	2019-06-03	B/Fujian-Gulou/1449/2019	WHO Chinese National Influenza Center	WHO Chinese National Influenza Center	Xiaoxu,Zeng;Xiyan,Li;Weijuan,Huang;Lei,Yang;Dayan,Wang
EPI_ISL_377020	Asia / China / Fujian	2019-06-03	B/Fujian-Chengxiang/1567/2019	WHO Chinese National Influenza Center	WHO Chinese National Influenza Center	Xiaoxu,Zeng;Xiyan,Li;Weijuan,Huang;Lei,Yang;Dayan,Wang
EPI_ISL_377021	Asia / China / Guangxi	2019-07-02	B/Guangxi-Youjiang/1573/2019	WHO Chinese National Influenza Center	WHO Chinese National Influenza Center	Xiaoxu,Zeng;Xiyan,Li;Weijuan,Huang;Lei,Yang;Dayan,Wang
EPI_ISL_377022	Asia / China / Yunnan	2019-07-09	B/Yunnan-Zhaoyang/1629/2019	WHO Chinese National Influenza Center	WHO Chinese National Influenza Center	Xiaoxu,Zeng;Xiyan,Li;Weijuan,Huang;Lei,Yang;Dayan,Wang
EPI_ISL_377023	Asia / China / Guangxi	2019-07-02	B/Guangxi-Xixiangtang/1578/2019	WHO Chinese National Influenza Center	WHO Chinese National Influenza Center	Xiaoxu,Zeng;Xiyan,Li;Weijuan,Huang;Lei,Yang;Dayan,Wang
EPI_ISL_377024	Asia / China	2019-07-01	B/Shanghai-Xuhui/1702/2019	WHO Chinese National Influenza Center	WHO Chinese National Influenza Center	Xiaoxu,Zeng;Xiyan,Li;Weijuan,Huang;Lei,Yang;Dayan,Wang
EPI_ISL_377025	Asia / China / Shanghai	2019-07-02	B/Shanghai-Pudongxin/11067/2019	WHO Chinese National Influenza Center	WHO Chinese National Influenza Center	Xiaoxu,Zeng;Xiyan,Li;Weijuan,Huang;Lei,Yang;Dayan,Wang
EPI_ISL_377026	Asia / China / Jiangxi	2019-06-10	B/Jiangxi-Yushui/1501/2019	WHO Chinese National Influenza Center	WHO Chinese National Influenza Center	Xiaoxu,Zeng;Xiyan,Li;Weijuan,Huang;Lei,Yang;Dayan,Wang
EPI_ISL_377027	Asia / China	2019-06-03	B/Guangxi-Hengxian/382/2019	WHO Chinese National Influenza Center	WHO Chinese National Influenza Center	Xiaoxu,Zeng;Xiyan,Li;Weijuan,Huang;Lei,Yang;Dayan,Wang
EPI_ISL_377028	Asia / China / Guangxi	2019-06-12	B/Guangxi-Qinbei/348/2019	WHO Chinese National Influenza Center	WHO Chinese National Influenza Center	Xiaoxu,Zeng;Xiyan,Li;Weijuan,Huang;Lei,Yang;Dayan,Wang
EPI_ISL_377029	Asia / China / Guangxi	2019-07-02	B/Guangxi-Xixiangtang/1574/2019	WHO Chinese National Influenza Center	WHO Chinese National Influenza Center	Xiaoxu,Zeng;Xiyan,Li;Weijuan,Huang;Lei,Yang;Dayan,Wang
EPI_ISL_377030	Asia / China / Guangxi	2019-06-03	B/Guangxi-Xinbin/1517/2019	WHO Chinese National Influenza Center	WHO Chinese National Influenza Center	Xiaoxu,Zeng;Xiyan,Li;Weijuan,Huang;Lei,Yang;Dayan,Wang
EPI_ISL_377031	Asia / China / Hubei	2019-06-05	B/Hubei-Songzi/1480/2019	WHO Chinese National Influenza Center	WHO Chinese National Influenza Center	Xiaoxu,Zeng;Xiyan,Li;Weijuan,Huang;Lei,Yang;Dayan,Wang
EPI_ISL_377032	Asia / China / Fujian	2019-06-10	B/Fujian-Siming/1464/2019	WHO Chinese National Influenza Center	WHO Chinese National Influenza Center	Xiaoxu,Zeng;Xiyan,Li;Weijuan,Huang;Lei,Yang;Dayan,Wang
EPI_ISL_377033	Asia / China / Guizhou	2019-06-20	B/Guizhou-Bijiang/1516/2019	WHO Chinese National Influenza Center	WHO Chinese National Influenza Center	Xiaoxu,Zeng;Xiyan,Li;Weijuan,Huang;Lei,Yang;Dayan,Wang
EPI_ISL_377034	Asia / China / Guangxi	2019-06-18	B/Guangxi-Haicheng/1804/2019	WHO Chinese National Influenza Center	WHO Chinese National Influenza Center	Xiaoxu,Zeng;Xiyan,Li;Weijuan,Huang;Lei,Yang;Dayan,Wang
EPI_ISL_377035	Asia / China / Anhui	2019-06-25	B/Anhui-Jinan/1713/2019	WHO Chinese National Influenza Center	WHO Chinese National Influenza Center	Xiaoxu,Zeng;Xiyan,Li;Weijuan,Huang;Lei,Yang;Dayan,Wang
EPI_ISL_377036	Asia / China / Fujian	2019-06-11	B/Fujian-Sanyuan/2504/2019	WHO Chinese National Influenza Center	WHO Chinese National Influenza Center	Xiaoxu,Zeng;Xiyan,Li;Weijuan,Huang;Lei,Yang;Dayan,Wang
EPI_ISL_377037	Asia / China / Zhejiang	2019-06-03	B/Zhejiang-Nanhu/1459/2019	WHO Chinese National Influenza Center	WHO Chinese National Influenza Center	Xiaoxu,Zeng;Xiyan,Li;Weijuan,Huang;Lei,Yang;Dayan,Wang
EPI_ISL_377038	Asia / China / Hubei	2019-06-11	B/Hubei-Huangshigang/1561/2019	WHO Chinese National Influenza Center	WHO Chinese National Influenza Center	Xiaoxu,Zeng;Xiyan,Li;Weijuan,Huang;Lei,Yang;Dayan,Wang
EPI_ISL_377039	Asia / China / Hubei	2019-06-04	B/Hubei-Maojian/11089/2019	WHO Chinese National Influenza Center	WHO Chinese National Influenza Center	Xiaoxu,Zeng;Xiyan,Li;Weijuan,Huang;Lei,Yang;Dayan,Wang
EPI_ISL_377040	Asia / China / Hunan	2019-06-11	B/Hunan-Yueyanglou/1470/2019	WHO Chinese National Influenza Center	WHO Chinese National Influenza Center	Xiaoxu,Zeng;Xiyan,Li;Weijuan,Huang;Lei,Yang;Dayan,Wang
EPI_ISL_377041	Asia / China / Guangdong	2019-06-03	B/Guangdong-Enping/322/2019	WHO Chinese National Influenza Center	WHO Chinese National Influenza Center	Xiaoxu,Zeng;Xiyan,Li;Weijuan,Huang;Lei,Yang;Dayan,Wang
EPI_ISL_377042	Asia / China / Guangdong	2019-06-10	B/Guangdong-Chancheng/1474/2019	WHO Chinese National Influenza Center	WHO Chinese National Influenza Center	Xiaoxu,Zeng;Xiyan,Li;Weijuan,Huang;Lei,Yang;Dayan,Wang
EPI_ISL_377043	Asia / China / Hainan	2019-06-10	B/Hainan-Wenchang/1457/2019	WHO Chinese National Influenza Center	WHO Chinese National Influenza Center	Xiaoxu,Zeng;Xiyan,Li;Weijuan,Huang;Lei,Yang;Dayan,Wang
EPI_ISL_377044	Asia / China / Sichuan	2019-06-04	B/Sichuan-Fucheng/1955/2019	WHO Chinese National Influenza Center	WHO Chinese National Influenza Center	Xiaoxu,Zeng;Xiyan,Li;Weijuan,Huang;Lei,Yang;Dayan,Wang
EPI_ISL_377045	Asia / China / Hunan	2019-06-03	B/Hunan-Heshan/1537/2019	WHO Chinese National Influenza Center	WHO Chinese National Influenza Center	Xiaoxu,Zeng;Xiyan,Li;Weijuan,Huang;Lei,Yang;Dayan,Wang
EPI_ISL_377046	Asia / China	2019-06-26	B/Shanghai-Huangpu/1571/2019	WHO Chinese National Influenza Center	WHO Chinese National Influenza Center	Xiaoxu,Zeng;Xiyan,Li;Weijuan,Huang;Lei,Yang;Dayan,Wang
EPI_ISL_377047	Asia / China / Guizhou	2019-06-03	B/Guizhou-Qixinguan/1443/2019	WHO Chinese National Influenza Center	WHO Chinese National Influenza Center	Xiaoxu,Zeng;Xiyan,Li;Weijuan,Huang;Lei,Yang;Dayan,Wang
EPI_ISL_377048	Asia / China / Jiangxi	2019-06-13	B/Jiangxi-Anyuan/1553/2019	WHO Chinese National Influenza Center	WHO Chinese National Influenza Center	Xiaoxu,Zeng;Xiyan,Li;Weijuan,Huang;Lei,Yang;Dayan,Wang
EPI_ISL_377085	Asia / China / Sichuan	2019-04-24	B/Sichuan-Lizhou/1339/2019	WHO Chinese National Influenza Center	WHO Chinese National Influenza Center	Xiaoxu,Zeng;Xiyan,Li;Weijuan,Huang;Lei,Yang;Dayan,Wang
EPI_ISL_377205	Africa / Madagascar	2019-06-17	B/Antananarivo/3649/2019	Institut Pasteur de Madagascar	Crick Worldwide Influenza Centre	NA
EPI_ISL_377206	Africa / Madagascar	2019-06-17	B/Antananarivo/3688/2019	Institut Pasteur de Madagascar	Crick Worldwide Influenza Centre	NA
EPI_ISL_377208	Africa / Madagascar	2019-06-24	B/Antananarivo/3780/2019	Institut Pasteur de Madagascar	Crick Worldwide Influenza Centre	NA
EPI_ISL_377214	Asia / Hong Kong (SAR)	2019-06-17	B/Hong Kong/574/2019	Government Virus Unit	Crick Worldwide Influenza Centre	NA
EPI_ISL_377218	Asia / Hong Kong (SAR)	2019-06-19	B/Hong Kong/578/2019	Government Virus Unit	Crick Worldwide Influenza Centre	NA
EPI_ISL_377227	Asia / Hong Kong (SAR)	2019-06-18	B/Hong Kong/587/2019	Government Virus Unit	Crick Worldwide Influenza Centre	NA
EPI_ISL_377404	Oceania / Australia / Victoria / Kilsyth	2019-06-21	B/Victoria/6/2019	Victorian Infectious Diseases Reference Laboratory	WHO Collaborating Centre for Reference and Research on Influenza	Deng,Y-M; Iannello,P; Lau,H; Todd,A; Spirason,N; Komadina,N.
EPI_ISL_377592	North America / United States / Louisiana	2019-03-26	B/Louisiana/16/2019	Louisiana Department of Health and Hospitals	Centers for Disease Control and Prevention	NA
EPI_ISL_377604	North America / United States / Hawaii	2019-07-08	B/Hawaii/30/2019	State of Hawaii Department of Health	Centers for Disease Control and Prevention	NA
EPI_ISL_378141	Europe / Norway / Hordaland	2019-06-12	B/Norway/2115/2019	Haukeland University Hospital, Dept. of Microbiology	Norwegian Institute of Public Health	Bragstad, K; Hungnes, O
EPI_ISL_378151	Europe / Norway / Vestfold	2019-06-26	B/Norway/2164/2019	Mikrobiologisk laboratorium, Sykehuset i Vestfold	Norwegian Institute of Public Health	Bragstad, K; Hungnes, O
EPI_ISL_379140	North America / Canada / MB	2019-06-19	B/Manitoba/RV2383/2019	Cadham Provincial Laboratory	Public Health Agency of Canada (PHAC)	Bastien, N.; Grenkow, D.; Hart, L.; Normand, S.; Powell, A.; Li, Y.
EPI_ISL_380145	North America / United States / Louisiana	2019-03-26	B/Louisiana/16/2019	Louisiana Department of Health and Hospitals	Centers for Disease Control and Prevention	NA
EPI_ISL_381561	Oceania / Guam	2019-06-13	B/Guam/9827/2019	NA	NA	Gruner,W.E.; Fries,A.C.; Garrett,C.M.; Powell,M.L.; Minnich,D.E.; Couch,M.R.; Hanson,J.F.; DeMarcus,L.S.; Crum,M.E.; Bogue,A.L.; Federinko,S.P.; Macias,E.A.; West,C.A.; Dane,D.J.
EPI_ISL_381714	Asia / Japan	2019-06-25	B/MIE/9/2019	Mie Prefecture Health and Environment Research Institute	National Institute of Infectious Diseases (NIID)	Kuwahara,Tomoko;Takashita,Emi;Fujisaki,Seiichiro;Shirakura,Masayuki;Watanabe,Shinji;Odagiri,Takato
EPI_ISL_381716	Asia / Japan	2019-06-15	B/YOKOHAMA/16/2019	Yokohama City Institute of Public Health.	National Institute of Infectious Diseases (NIID)	Kuwahara,Tomoko;Takashita,Emi;Fujisaki,Seiichiro;Shirakura,Masayuki;Watanabe,Shinji;Odagiri,Takato
EPI_ISL_3856643	Asia / China	2021-03-22	B/Fujian-Zhangpu/34/2021	WHO Chinese National Influenza Center	Centers for Disease Control and Prevention	NA
EPI_ISL_3856657	Asia / China	2021-03-30	B/Gansu-Chengguan/1515/2021	WHO Chinese National Influenza Center	Centers for Disease Control and Prevention	NA
EPI_ISL_3856664	Asia / China	2021-02-17	B/Henan-Xigong/1118/2021	WHO Chinese National Influenza Center	Centers for Disease Control and Prevention	NA
EPI_ISL_3856671	Asia / China	2021-03-17	B/Hainan-Meilan/32/2021	WHO Chinese National Influenza Center	Centers for Disease Control and Prevention	NA
EPI_ISL_3856678	Asia / China	2021-04-13	B/Gansu-Baiyin/1281/2021	WHO Chinese National Influenza Center	Centers for Disease Control and Prevention	NA
EPI_ISL_3856685	Asia / China	2021-03-18	B/Hubei-Wujiagang/1299/2021	WHO Chinese National Influenza Center	Centers for Disease Control and Prevention	NA
EPI_ISL_3856692	Asia / China	2021-03-22	B/Fujian-Zhangpu/34/2021	WHO Chinese National Influenza Center	Centers for Disease Control and Prevention	NA
EPI_ISL_3856699	Asia / China	2021-03-11	B/Shanghai-Songjiang/1193/2021	WHO Chinese National Influenza Center	Centers for Disease Control and Prevention	NA
EPI_ISL_3856706	Asia / China	2021-04-14	B/Gansu-Baiyin/1293/2021	WHO Chinese National Influenza Center	Centers for Disease Control and Prevention	NA
EPI_ISL_3856713	Asia / China	2021-03-29	B/Henan-Shanyang/37/2021	WHO Chinese National Influenza Center	Centers for Disease Control and Prevention	NA
EPI_ISL_3856720	Asia / China	2021-03-29	B/Henan-Shanyang/37/2021	WHO Chinese National Influenza Center	Centers for Disease Control and Prevention	NA
EPI_ISL_3856727	Asia / China	2021-02-17	B/Henan-Xigong/1118/2021	WHO Chinese National Influenza Center	Centers for Disease Control and Prevention	NA
EPI_ISL_3856734	Asia / China	2021-03-18	B/Hubei-Wujiagang/1299/2021	WHO Chinese National Influenza Center	Centers for Disease Control and Prevention	NA
EPI_ISL_386892	North America / United States / Florida	2019-07-22	B/Florida/35/2019	Florida Department of Health-Tampa	Centers for Disease Control and Prevention	NA
EPI_ISL_386893	North America / United States / Florida	2019-07-17	B/Florida/34/2019	Florida Department of Health-Tampa	Centers for Disease Control and Prevention	NA
EPI_ISL_386898	North America / United States / Hawaii	2019-07-26	B/Hawaii/33/2019	State of Hawaii Department of Health	Centers for Disease Control and Prevention	NA
EPI_ISL_386908	Asia / Bahrain	2019-03-31	B/Bahrain/232/2019	Ministry of Health Bahrain	Centers for Disease Control and Prevention	NA
EPI_ISL_386909	North America / United States / Hawaii	2019-07-20	B/Hawaii/32/2019	State of Hawaii Department of Health	Centers for Disease Control and Prevention	NA
EPI_ISL_386913	North America / United States / Louisiana	2019-03-26	B/Louisiana/16/2019	Louisiana Department of Health and Hospitals	Centers for Disease Control and Prevention	NA
EPI_ISL_389020	Oceania / Australia / Victoria / Melbourne	2019-07-19	B/Victoria/15/2019	Victorian Infectious Diseases Reference Laboratory	WHO Collaborating Centre for Reference and Research on Influenza	Deng,Y-M; Iannello,P; Lau,H; Todd,A; Spirason,N; Komadina,N.
EPI_ISL_389021	Oceania / Australia / Victoria / Melbourne	2019-08-01	B/Victoria/25/2019	Victorian Infectious Diseases Reference Laboratory	WHO Collaborating Centre for Reference and Research on Influenza	Deng,Y-M; Iannello,P; Lau,H; Todd,A; Spirason,N; Komadina,N.
EPI_ISL_389095	Asia / Japan	2019-06-24	B/KANAGAWA/AC1887/2019	National Institute of Infectious Diseases (NIID)	National Institute of Infectious Diseases (NIID)	Kuwahara,Tomoko;Takashita,Emi;Fujisaki,Seiichiro;Shirakura,Masayuki;Watanabe,Shinji;Odagiri,Takato
EPI_ISL_389166	Europe / Norway / Telemark	2019-07-28	B/Norway/2211/2019	Ostfold Hospital - Fredrikstad, Dept. of Microbiology	Norwegian Institute of Public Health	Bragstad, K; Hungnes, O
EPI_ISL_389234	Africa / Madagascar	2019-06-12	B/Antananarivo/3593/2019	Institut Pasteur de Madagascar	Crick Worldwide Influenza Centre	NA
EPI_ISL_389236	Africa / Madagascar	2019-06-17	B/Antananarivo/3688/2019	Institut Pasteur de Madagascar	Crick Worldwide Influenza Centre	NA
EPI_ISL_389238	Africa / Madagascar	2019-06-19	B/Antananarivo/3745/2019	Institut Pasteur de Madagascar	Crick Worldwide Influenza Centre	NA
EPI_ISL_389239	Africa / Madagascar	2019-06-24	B/Antananarivo/3779/2019	Institut Pasteur de Madagascar	Crick Worldwide Influenza Centre	NA
EPI_ISL_389240	Africa / Madagascar	2019-06-24	B/Antananarivo/3780/2019	Institut Pasteur de Madagascar	Crick Worldwide Influenza Centre	NA
EPI_ISL_389244	Asia / Oman	2019-06-15	B/Oman/4147/2019	Central Public Health Laboratory, Ministry of Health	Crick Worldwide Influenza Centre	NA
EPI_ISL_389245	Asia / Oman	2019-06-22	B/Oman/4229/2019	Central Public Health Laboratory, Ministry of Health	Crick Worldwide Influenza Centre	NA
EPI_ISL_389246	Asia / Oman	2019-06-23	B/Oman/4241/2019	Central Public Health Laboratory, Ministry of Health	Crick Worldwide Influenza Centre	NA
EPI_ISL_389247	Asia / Oman	2019-06-28	B/Oman/4309/2019	Central Public Health Laboratory, Ministry of Health	Crick Worldwide Influenza Centre	NA
EPI_ISL_389248	Asia / Oman	2019-07-02	B/Oman/4324/2019	Central Public Health Laboratory, Ministry of Health	Crick Worldwide Influenza Centre	NA
EPI_ISL_389249	Asia / Oman	2019-07-17	B/Oman/4504/2019	Central Public Health Laboratory, Ministry of Health	Crick Worldwide Influenza Centre	NA
EPI_ISL_389345	Oceania / New Caledonia	2019-06-15	B/New Caledonia/8/2019	Institut Pasteur New Caledonia	WHO Collaborating Centre for Reference and Research on Influenza	Deng,Y-M; Iannello,P; Lau,H; Todd,A; Spirason,N; Komadina,N.
EPI_ISL_389346	Oceania / New Caledonia	2019-07-08	B/New Caledonia/10/2019	Institut Pasteur New Caledonia	WHO Collaborating Centre for Reference and Research on Influenza	Deng,Y-M; Iannello,P; Lau,H; Todd,A; Spirason,N; Komadina,N.
EPI_ISL_389347	Oceania / New Caledonia	2019-07-23	B/New Caledonia/17/2019	Institut Pasteur New Caledonia	WHO Collaborating Centre for Reference and Research on Influenza	Deng,Y-M; Iannello,P; Lau,H; Todd,A; Spirason,N; Komadina,N.
EPI_ISL_389351	Oceania / Australia / New South Wales / St Marys	2019-06-13	B/Sydney/8/2019	Clinical Virology Unit, CDIM	WHO Collaborating Centre for Reference and Research on Influenza	Deng,Y-M; Iannello,P; Lau,H; Todd,A; Spirason,N; Komadina,N.
EPI_ISL_389355	Oceania / Australia / Western Australia / Cloverdale	2019-06-25	B/Perth/1036/2019	Institute of Medical and Veterinary Science (IMVS)	WHO Collaborating Centre for Reference and Research on Influenza	Deng,Y-M; Iannello,P; Lau,H; Todd,A; Spirason,N; Komadina,N.
EPI_ISL_389492	Oceania / Australia / Queensland / Mermaid Waters	2019-07-14	B/Brisbane/14/2019	Queensland Health Forensic and Scientific Services	WHO Collaborating Centre for Reference and Research on Influenza	Deng,Y-M; Iannello,P; Lau,H; Todd,A; Spirason,N; Komadina,N.
EPI_ISL_389497	Oceania / Australia / Victoria / Kew	2019-08-03	B/Victoria/26/2019	Victorian Infectious Diseases Reference Laboratory	WHO Collaborating Centre for Reference and Research on Influenza	Deng,Y-M; Iannello,P; Lau,H; Todd,A; Spirason,N; Komadina,N.
EPI_ISL_389498	Oceania / Australia / Victoria / Melbourne	2019-08-05	B/Victoria/27/2019	Victorian Infectious Diseases Reference Laboratory	WHO Collaborating Centre for Reference and Research on Influenza	Deng,Y-M; Iannello,P; Lau,H; Todd,A; Spirason,N; Komadina,N.
EPI_ISL_389547	Oceania / Australia / Victoria	2019-07-06	B/Victoria/10/2019	Victorian Infectious Diseases Reference Laboratory	WHO Collaborating Centre for Reference and Research on Influenza	Deng,Y-M; Iannello,P; Lau,H; Todd,A; Spirason,N; Komadina,N.
EPI_ISL_389548	Oceania / Australia / Victoria / Ivanhoe	2019-07-05	B/Victoria/11/2019	Victorian Infectious Diseases Reference Laboratory	WHO Collaborating Centre for Reference and Research on Influenza	Deng,Y-M; Iannello,P; Lau,H; Todd,A; Spirason,N; Komadina,N.
EPI_ISL_389551	Oceania / Australia / Victoria / Pascoe Vale	2019-06-21	B/Victoria/950/2019	Royal Chidrens Hospital	WHO Collaborating Centre for Reference and Research on Influenza	Deng,Y-M; Iannello,P; Lau,H; Todd,A; Spirason,N; Komadina,N.
EPI_ISL_389943	Asia / Hong Kong (SAR)	2019-07-17	B/Hong Kong/738/2019	Government Virus Unit	Centers for Disease Control and Prevention	NA
EPI_ISL_389944	Asia / Hong Kong (SAR)	2019-07-16	B/Hong Kong/733/2019	Government Virus Unit	Centers for Disease Control and Prevention	NA
EPI_ISL_389945	Asia / Hong Kong (SAR)	2019-07-16	B/Hong Kong/742/2019	Government Virus Unit	Centers for Disease Control and Prevention	NA
EPI_ISL_389946	Asia / Hong Kong (SAR)	2019-07-16	B/Hong Kong/741/2019	Government Virus Unit	Centers for Disease Control and Prevention	NA
EPI_ISL_389947	Asia / Hong Kong (SAR)	2019-07-18	B/Hong Kong/746/2019	Government Virus Unit	Centers for Disease Control and Prevention	NA
EPI_ISL_389948	Asia / Hong Kong (SAR)	2019-07-17	B/Hong Kong/744/2019	Government Virus Unit	Centers for Disease Control and Prevention	NA
EPI_ISL_389951	Asia / Hong Kong (SAR)	2019-07-16	B/Hong Kong/736/2019	Government Virus Unit	Centers for Disease Control and Prevention	NA
EPI_ISL_389952	Asia / Hong Kong (SAR)	2019-07-16	B/Hong Kong/734/2019	Government Virus Unit	Centers for Disease Control and Prevention	NA
EPI_ISL_389957	Asia / China	2019-02-25	B/Shanghai-Changning/1228/2019	WHO Chinese National Influenza Center	Centers for Disease Control and Prevention	NA
EPI_ISL_389967	Africa / Congo, the Democatic Republic of	2019-06-11	B/Congo/368/2019	INRB Service de Virologie	Centers for Disease Control and Prevention	NA
EPI_ISL_389975	Asia / Bangladesh	2019-06-11	B/Bangladesh/1190609012/2019	icddr,b International Centre for Diarrhoeal Disease Research, Bangladesh	Centers for Disease Control and Prevention	NA
EPI_ISL_389984	Asia / Bangladesh	2019-06-11	B/Bangladesh/1190614010/2019	icddr,b International Centre for Diarrhoeal Disease Research, Bangladesh	Centers for Disease Control and Prevention	NA
EPI_ISL_389986	Asia / Bangladesh	2019-06-15	B/Bangladesh/1006/2019	icddr,b International Centre for Diarrhoeal Disease Research, Bangladesh	Centers for Disease Control and Prevention	NA
EPI_ISL_389987	South America / Chile	2019-07-04	B/Talca/63221/2019	Instituto de Salud Publica de Chile	Centers for Disease Control and Prevention	NA
EPI_ISL_389988	South America / Chile	2019-07-09	B/Santiago/62161/2019	Instituto de Salud Publica de Chile	Centers for Disease Control and Prevention	NA
EPI_ISL_390420	Asia / Japan	2019-06-12	B/YAMAGATA/162/2019	Yamagata Prefectural Institute of Public Health	National Institute of Infectious Diseases (NIID)	Kuwahara,Tomoko;Takashita,Emi;Fujisaki,Seiichiro;Shirakura,Masayuki;Watanabe,Shinji;Odagiri,Takato
EPI_ISL_390445	Asia / Taiwan	2019-06-20	B/Taiwan/70490/2019	Center for Disease Control	National Institute of Infectious Diseases (NIID)	Kuwahara,Tomoko;Takashita,Emi;Fujisaki,Seiichiro;Shirakura,Masayuki;Watanabe,Shinji;Odagiri,Takato
EPI_ISL_390616	Asia / China / Jiangxi	2019-05-28	B/Jiangxi-Yuanzhou/1874/2019	WHO Chinese National Influenza Center	WHO Chinese National Influenza Center	Zeng Xiaoxu, Li Xiyan, Dayan Wang
EPI_ISL_390617	Asia / China / Hunan	2019-08-06	B/Hunan-Hecheng/1847/2019	WHO Chinese National Influenza Center	WHO Chinese National Influenza Center	Zeng Xiaoxu, Li Xiyan, Dayan Wang
EPI_ISL_390618	Asia / China / Jiangxi	2019-08-05	B/Jiangxi-Zhanggong/1663/2019	WHO Chinese National Influenza Center	WHO Chinese National Influenza Center	Zeng Xiaoxu, Li Xiyan, Dayan Wang
EPI_ISL_390619	Asia / China / Guangxi	2019-08-05	B/Guangxi-Qinnan/1968/2019	WHO Chinese National Influenza Center	WHO Chinese National Influenza Center	Zeng Xiaoxu, Li Xiyan, Dayan Wang
EPI_ISL_390620	Asia / China / Sichuan	2019-08-07	B/Sichuan-Ziliujing/1732/2019	WHO Chinese National Influenza Center	WHO Chinese National Influenza Center	Zeng Xiaoxu, Li Xiyan, Dayan Wang
EPI_ISL_390621	Asia / China / Guangdong	2019-08-05	B/Guangdong-Rongcheng/1628/2019	WHO Chinese National Influenza Center	WHO Chinese National Influenza Center	Zeng Xiaoxu, Li Xiyan, Dayan Wang
EPI_ISL_390622	Asia / China / Fujian	2019-08-05	B/Fujian-Yanping/11541/2019	WHO Chinese National Influenza Center	WHO Chinese National Influenza Center	Zeng Xiaoxu, Li Xiyan, Dayan Wang
EPI_ISL_390634	Asia / China / Fujian	2019-07-29	B/Fujian-Siming/1608/2019	WHO Chinese National Influenza Center	WHO Chinese National Influenza Center	Zeng Xiaoxu, Li Xiyan, Dayan Wang
EPI_ISL_390635	Asia / China / Guangxi	2019-08-06	B/Guangxi-Xinbin/1725/2019	WHO Chinese National Influenza Center	WHO Chinese National Influenza Center	Zeng Xiaoxu, Li Xiyan, Dayan Wang
EPI_ISL_390636	Asia / China / Guangxi	2019-07-31	B/Guangxi-Gangbei/1712/2019	WHO Chinese National Influenza Center	WHO Chinese National Influenza Center	Zeng Xiaoxu, Li Xiyan, Dayan Wang
EPI_ISL_390637	Asia / China / Guangdong	2019-07-29	B/Guangdong-Xiangqiao/1626/2019	WHO Chinese National Influenza Center	WHO Chinese National Influenza Center	Zeng Xiaoxu, Li Xiyan, Dayan Wang
EPI_ISL_390638	Asia / China / Guangdong	2019-07-29	B/Guangdong-Maonan/1658/2019	WHO Chinese National Influenza Center	WHO Chinese National Influenza Center	Zeng Xiaoxu, Li Xiyan, Dayan Wang
EPI_ISL_390639	Asia / China / Jiangxi	2019-08-01	B/Jiangxi-Anyuan/1699/2019	WHO Chinese National Influenza Center	WHO Chinese National Influenza Center	Zeng Xiaoxu, Li Xiyan, Dayan Wang
EPI_ISL_390640	Asia / China / Anhui	2019-07-10	B/Anhui-Jinan/1751/2019	WHO Chinese National Influenza Center	WHO Chinese National Influenza Center	Zeng Xiaoxu, Li Xiyan, Dayan Wang
EPI_ISL_390641	Asia / China / Fujian	2019-07-15	B/Fujian-Siming/1571/2019	WHO Chinese National Influenza Center	WHO Chinese National Influenza Center	Zeng Xiaoxu, Li Xiyan, Dayan Wang
EPI_ISL_390642	Asia / China / Guangxi	2019-07-09	B/Guangxi-Fangcheng/1660/2019	WHO Chinese National Influenza Center	WHO Chinese National Influenza Center	Zeng Xiaoxu, Li Xiyan, Dayan Wang
EPI_ISL_390643	Asia / China / Guizhou	2019-07-10	B/Guizhou-Xinyi/1544/2019	WHO Chinese National Influenza Center	WHO Chinese National Influenza Center	Zeng Xiaoxu, Li Xiyan, Dayan Wang
EPI_ISL_390644	Asia / China / Guangdong	2019-07-10	B/Guangdong-Yuancheng/1559/2019	WHO Chinese National Influenza Center	WHO Chinese National Influenza Center	Zeng Xiaoxu, Li Xiyan, Dayan Wang
EPI_ISL_390645	Asia / China / Hubei	2019-06-15	B/Hubei-Shashi/8275/2019	WHO Chinese National Influenza Center	WHO Chinese National Influenza Center	Zeng Xiaoxu, Li Xiyan, Dayan Wang
EPI_ISL_390646	Asia / China / Sichuan	2019-07-09	B/Sichuan-Tongchuan/1516/2019	WHO Chinese National Influenza Center	WHO Chinese National Influenza Center	Zeng Xiaoxu, Li Xiyan, Dayan Wang
EPI_ISL_390647	Asia / China / Guangdong	2019-06-25	B/Guangdong-Yuancheng/1511/2019	WHO Chinese National Influenza Center	WHO Chinese National Influenza Center	Zeng Xiaoxu, Li Xiyan, Dayan Wang
EPI_ISL_390649	Asia / China / Guangdong	2019-06-18	B/Guangdong-Zhongshan/1558/2019	WHO Chinese National Influenza Center	WHO Chinese National Influenza Center	Zeng Xiaoxu, Li Xiyan, Dayan Wang
EPI_ISL_390650	Asia / China / Hunan	2019-06-14	B/Hunan-Suxian/1588/2019	WHO Chinese National Influenza Center	WHO Chinese National Influenza Center	Zeng Xiaoxu, Li Xiyan, Dayan Wang
EPI_ISL_390651	Asia / China / Hunan	2019-06-17	B/Hunan-Hecheng/1745/2019	WHO Chinese National Influenza Center	WHO Chinese National Influenza Center	Zeng Xiaoxu, Li Xiyan, Dayan Wang
EPI_ISL_390652	Asia / China / Guangdong	2019-05-05	B/Guangdong-Chikan/1360/2019	WHO Chinese National Influenza Center	WHO Chinese National Influenza Center	Zeng Xiaoxu, Li Xiyan, Dayan Wang
EPI_ISL_390653	Asia / China / Guangdong	2019-05-09	B/Guangdong-Maonan/891/2019	WHO Chinese National Influenza Center	WHO Chinese National Influenza Center	Zeng Xiaoxu, Li Xiyan, Dayan Wang
EPI_ISL_390708	Asia / China / Yunnan	2019-06-25	B/Yunnan-Linxiang/1554/2019	WHO Chinese National Influenza Center	WHO Chinese National Influenza Center	Zeng Xiaoxu, Li Xiyan, Dayan Wang
EPI_ISL_390741	Oceania / Australia / New South Wales / Merrylands	2019-06-18	B/Sydney/28/2019	Clinical Virology Unit, CDIM	WHO Collaborating Centre for Reference and Research on Influenza	Deng,Y-M; Iannello,P; Lau,H; Todd,A; Spirason,N; Moselen,J; Komadina,N.
EPI_ISL_390743	Oceania / Australia / New South Wales / North Rocks	2019-06-26	B/Sydney/31/2019	Clinical Virology Unit, CDIM	WHO Collaborating Centre for Reference and Research on Influenza	Deng,Y-M; Iannello,P; Lau,H; Todd,A; Spirason,N; Moselen,J; Komadina,N.
EPI_ISL_390747	Oceania / Australia / Western Australia / Dungraig	2019-06-20	B/Perth/1031/2019	Institute of Medical and Veterinary Science (IMVS)	WHO Collaborating Centre for Reference and Research on Influenza	Deng,Y-M; Iannello,P; Lau,H; Todd,A; Spirason,N; Moselen,J; Komadina,N.
EPI_ISL_390748	Oceania / Australia / Queensland / Marsden	2019-07-31	B/Brisbane/18/2019	Queensland Health Forensic and Scientific Services	WHO Collaborating Centre for Reference and Research on Influenza	Deng,Y-M; Iannello,P; Lau,H; Todd,A; Spirason,N; Moselen,J; Komadina,N.
EPI_ISL_390749	Oceania / Australia / Queensland / Mudgeeraba	2019-08-02	B/Brisbane/19/2019	Queensland Health Forensic and Scientific Services	WHO Collaborating Centre for Reference and Research on Influenza	Deng,Y-M; Iannello,P; Lau,H; Todd,A; Spirason,N; Moselen,J; Komadina,N.
EPI_ISL_390751	Oceania / Australia / Queensland / Slacks Creek	2019-08-13	B/Brisbane/22/2019	Queensland Health Forensic and Scientific Services	WHO Collaborating Centre for Reference and Research on Influenza	Deng,Y-M; Iannello,P; Lau,H; Todd,A; Spirason,N; Moselen,J; Komadina,N.
EPI_ISL_390753	Oceania / Australia / Tasmania / Cornelian Bay	2019-08-06	B/Tasmania/501/2019	Hobart Pathology	WHO Collaborating Centre for Reference and Research on Influenza	Deng,Y-M; Iannello,P; Lau,H; Todd,A; Spirason,N; Moselen,J; Komadina,N.
EPI_ISL_390754	Oceania / Australia / New South Wales / Auburn	2019-08-12	B/Sydney/1062/2019	Institute of Medical and Veterinary Science (IMVS)	WHO Collaborating Centre for Reference and Research on Influenza	Deng,Y-M; Iannello,P; Lau,H; Todd,A; Spirason,N; Moselen,J; Komadina,N.
EPI_ISL_390755	Oceania / Australia / New South Wales / Walarobba	2019-08-05	B/Newcastle/8/2019	John Hunter Hospital	WHO Collaborating Centre for Reference and Research on Influenza	Deng,Y-M; Iannello,P; Lau,H; Todd,A; Spirason,N; Moselen,J; Komadina,N.
EPI_ISL_390758	Oceania / Australia / Victoria / Waurn Ponds	2019-08-28	B/Victoria/35/2019	Victorian Infectious Diseases Reference Laboratory	WHO Collaborating Centre for Reference and Research on Influenza	Deng,Y-M; Iannello,P; Lau,H; Todd,A; Spirason,N; Moselen,J; Komadina,N.
EPI_ISL_390910	Europe / France / Ile de France	2019-07-12	B/Paris/2090/2019	Institut Pasteur	Institut Pasteur	NA
EPI_ISL_391013	Asia / China / Fujian	2019-08-06	B/Fujian-Cangshan/1662/2019	WHO Chinese National Influenza Center	WHO Chinese National Influenza Center	Zeng Xiaoxu, Li Xiyan, Dayan Wang
EPI_ISL_391014	Asia / China / Fujian	2019-08-06	B/Fujian-Cangshan/1662/2019	WHO Chinese National Influenza Center	WHO Chinese National Influenza Center	Zeng Xiaoxu, Li Xiyan, Dayan Wang
EPI_ISL_391015	Asia / China / Shanghai	2019-02-25	B/Shanghai-Changning/1228/2019	WHO Chinese National Influenza Center	WHO Chinese National Influenza Center	Zeng Xiaoxu, Li Xiyan, Dayan Wang
EPI_ISL_391016	Asia / China / Shanghai	2019-02-25	B/Shanghai-Changning/1228/2019	WHO Chinese National Influenza Center	WHO Chinese National Influenza Center	Zeng Xiaoxu, Li Xiyan, Dayan Wang
EPI_ISL_391022	Asia / China / Shanghai	2019-08-05	B/Shanghai-Fengxian/1679/2019	WHO Chinese National Influenza Center	WHO Chinese National Influenza Center	Zeng Xiaoxu, Li Xiyan, Dayan Wang
EPI_ISL_391068	Europe / Sweden / Stockholms lan	2019-07-15	B/Stockholm/3/2019	Klinisk mikrobiologi, Karolinska Universitetslaboratoriet, Karolinska Universitetssjukhuset Solna	Public Health Agency of Sweden	NA
EPI_ISL_391069	Europe / Sweden / Norrbottens lan	2019-08-01	B/Lulea/1/2019	Laboratoriemedicin, Mikrobiologiska laboratoriet, Sunderby sjukhus Lulea	Public Health Agency of Sweden	NA
EPI_ISL_391070	Europe / Sweden / Stockholms lan	2019-08-19	B/Stockholm/4/2019	Klinisk mikrobiologi, Karolinska Universitetslaboratoriet, Karolinska Universitetssjukhuset Solna	Public Health Agency of Sweden	NA
EPI_ISL_391310	Asia / China	2019-02-25	B/Shanghai-Changning/1228/2019	WHO Chinese National Influenza Center	Centers for Disease Control and Prevention	NA
EPI_ISL_391319	Asia / Japan	2019-04-27	B/Kanagawa/IC18169/2019	National Institute of Infectious Diseases (NIID)	Centers for Disease Control and Prevention	NA
EPI_ISL_391332	Asia / Bangladesh	2019-06-18	B/Bangladesh/1190604018 /2019	icddr,b International Centre for Diarrhoeal Disease Research, Bangladesh	Centers for Disease Control and Prevention	NA
EPI_ISL_391333	Asia / Bangladesh	2019-06-20	B/Bangladesh/4026/2019	icddr,b International Centre for Diarrhoeal Disease Research, Bangladesh	Centers for Disease Control and Prevention	NA
EPI_ISL_391334	Asia / Bangladesh	2019-06-26	B/Bangladesh/4014/2019	icddr,b International Centre for Diarrhoeal Disease Research, Bangladesh	Centers for Disease Control and Prevention	NA
EPI_ISL_391335	Asia / India	2019-07-03	B/India/1326/2019	National Institute of Virology	Centers for Disease Control and Prevention	NA
EPI_ISL_391336	North America / Costa Rica	2019-07-10	B/Costa Rica/8858/2019	Laboratorio Nacional de Influenza	Centers for Disease Control and Prevention	NA
EPI_ISL_391340	Asia / India	2019-07-25	B/India/1591/2019	National Institute of Virology	Centers for Disease Control and Prevention	NA
EPI_ISL_391342	North America / United States / Hawaii	2019-08-07	B/Hawaii/34/2019	State of Hawaii Department of Health	Centers for Disease Control and Prevention	NA
EPI_ISL_391350	Asia / Hong Kong (SAR)	2019-06-17	B/Hong Kong/574/2019	National Institute for Medical Research	Centers for Disease Control and Prevention	NA
EPI_ISL_391353	Asia / Hong Kong (SAR)	2019-06-17	B/Hong Kong/574/2019	National Institute for Medical Research	Centers for Disease Control and Prevention	NA
EPI_ISL_391744	Asia / Singapore	2019-06-14	B/Singapore/MOH0105/2019	Ministry of Health, Singapore	Ministry of Health, Singapore	Chen,B.;Zhou, Z.; Mak,T.M.; Cui,L; Lin,R.T.P.
EPI_ISL_391746	Asia / Singapore	2019-06-14	B/Singapore/MOH0108/2019	Ministry of Health, Singapore	Ministry of Health, Singapore	Chen,B.;Zhou, Z.; Mak,T.M.; Cui,L; Lin,R.T.P.
EPI_ISL_391747	Asia / Singapore	2019-06-14	B/Singapore/MOH0111/2019	Ministry of Health, Singapore	Ministry of Health, Singapore	Chen,B.;Zhou, Z.; Mak,T.M.; Cui,L; Lin,R.T.P.
EPI_ISL_391748	Asia / Singapore	2019-06-14	B/Singapore/MOH0112/2019	Ministry of Health, Singapore	Ministry of Health, Singapore	Chen,B.;Zhou, Z.; Mak,T.M.; Cui,L; Lin,R.T.P.
EPI_ISL_393625	South America / Brazil	2019-06-12	B/Sao Paulo/1190756-IAL/2019	Instituto Adolfo Lutz	Centers for Disease Control and Prevention	NA
EPI_ISL_393626	South America / Brazil	2019-06-11	B/Cotia/1188939-IAL/2019	Instituto Adolfo Lutz	Centers for Disease Control and Prevention	NA
EPI_ISL_393627	South America / Brazil	2019-07-01	B/Sao Paulo/1211465-IAL/2019	Instituto Adolfo Lutz	Centers for Disease Control and Prevention	NA
EPI_ISL_393628	South America / Brazil	2019-07-02	B/Araras/1214818-IAL/2019	Instituto Adolfo Lutz	Centers for Disease Control and Prevention	NA
EPI_ISL_393629	South America / Brazil	2019-07-05	B/Marilia/1216668-IAL/2019	Instituto Adolfo Lutz	Centers for Disease Control and Prevention	NA
EPI_ISL_393631	South America / Brazil	2019-06-25	B/Sorocaba/869778-IAL/2019	Instituto Adolfo Lutz	Centers for Disease Control and Prevention	NA
EPI_ISL_393638	North America / United States / California	2019-08-11	B/California/29/2019	California Department of Health Services	Centers for Disease Control and Prevention	NA
EPI_ISL_393639	North America / United States / California	2019-08-10	B/California/26/2019	California Department of Health Services	Centers for Disease Control and Prevention	NA
EPI_ISL_393640	North America / United States / California	2019-08-10	B/California/28/2019	California Department of Health Services	Centers for Disease Control and Prevention	NA
EPI_ISL_393641	North America / United States / California	2019-08-13	B/California/30/2019	California Department of Health Services	Centers for Disease Control and Prevention	NA
EPI_ISL_393642	North America / United States / Florida	2019-09-10	B/Florida/50/2019	Florida Department of Health-Tampa	Centers for Disease Control and Prevention	NA
EPI_ISL_393643	North America / United States / Florida	2019-09-03	B/Florida/48/2019	Florida Department of Health-Tampa	Centers for Disease Control and Prevention	NA
EPI_ISL_393644	North America / United States / Florida	2019-09-01	B/Florida/47/2019	Florida Department of Health-Tampa	Centers for Disease Control and Prevention	NA
EPI_ISL_393646	North America / United States / Florida	2019-09-11	B/Florida/51/2019	Florida Department of Health-Tampa	Centers for Disease Control and Prevention	NA
EPI_ISL_393653	North America / United States / Louisiana	2019-08-22	B/Louisiana/25/2019	Louisiana Department of Health and Hospitals	Centers for Disease Control and Prevention	NA
EPI_ISL_393660	North America / United States / Florida	2019-08-25	B/Florida/44/2019	Florida Department of Health-Jacksonville	Centers for Disease Control and Prevention	NA
EPI_ISL_393661	North America / United States / Florida	2019-08-24	B/Florida/43/2019	Florida Department of Health-Jacksonville	Centers for Disease Control and Prevention	NA
EPI_ISL_393664	North America / United States / Florida	2019-08-21	B/Florida/41/2019	Florida Department of Health-Tampa	Centers for Disease Control and Prevention	NA
EPI_ISL_393805	Africa / Togo	2019-07-22	B/Togo/888/2019	Institute National D'Hygiene	Centers for Disease Control and Prevention	NA
EPI_ISL_393807	Africa / Togo	2019-07-11	B/Togo/860/2019	Institute National D'Hygiene	Centers for Disease Control and Prevention	NA
EPI_ISL_393808	Africa / Togo	2019-06-25	B/Togo/750/2019	Institute National D'Hygiene	Centers for Disease Control and Prevention	NA
EPI_ISL_393809	Africa / Togo	2019-06-25	B/Togo/752/2019	Institute National D'Hygiene	Centers for Disease Control and Prevention	NA
EPI_ISL_393810	Africa / Togo	2019-07-05	B/Togo/794/2019	Institute National D'Hygiene	Centers for Disease Control and Prevention	NA
EPI_ISL_393820	Africa / Kenya	2019-07-01	B/Kenya/128/2019	CDC-Kenya	Centers for Disease Control and Prevention	NA
EPI_ISL_393885	Europe / Norway	2019-06-12	B/Norway/2115/2019	WHO National Influenza Centre	Crick Worldwide Influenza Centre	NA
EPI_ISL_393891	Asia / Oman	2019-06-12	B/Oman/4116/2019	Central Public Health Laboratory, Ministry of Health	Crick Worldwide Influenza Centre	NA
EPI_ISL_393892	Asia / Oman	2019-06-15	B/Oman/4147/2019	Central Public Health Laboratory, Ministry of Health	Crick Worldwide Influenza Centre	NA
EPI_ISL_393893	Asia / Oman	2019-06-22	B/Oman/4229/2019	Central Public Health Laboratory, Ministry of Health	Crick Worldwide Influenza Centre	NA
EPI_ISL_393894	Asia / Oman	2019-06-22	B/Oman/4234/2019	Central Public Health Laboratory, Ministry of Health	Crick Worldwide Influenza Centre	NA
EPI_ISL_393895	Asia / Oman	2019-06-23	B/Oman/4241/2019	Central Public Health Laboratory, Ministry of Health	Crick Worldwide Influenza Centre	NA
EPI_ISL_393896	Asia / Oman	2019-07-02	B/Oman/4324/2019	Central Public Health Laboratory, Ministry of Health	Crick Worldwide Influenza Centre	NA
EPI_ISL_393897	Asia / Oman	2019-06-30	B/Oman/4332/2019	Central Public Health Laboratory, Ministry of Health	Crick Worldwide Influenza Centre	NA
EPI_ISL_393898	Asia / Oman	2019-07-04	B/Oman/4357/2019	Central Public Health Laboratory, Ministry of Health	Crick Worldwide Influenza Centre	NA
EPI_ISL_393899	Asia / Oman	2019-07-08	B/Oman/4412/2019	Central Public Health Laboratory, Ministry of Health	Crick Worldwide Influenza Centre	NA
EPI_ISL_393900	Asia / Oman	2019-07-17	B/Oman/4504/2019	Central Public Health Laboratory, Ministry of Health	Crick Worldwide Influenza Centre	NA
EPI_ISL_394159	Asia / Japan	2019-09-02	B/YOKOHAMA/18/2019	Yokohama City Institute of Public Health.	National Institute of Infectious Diseases (NIID)	Kuwahara,Tomoko;Takashita,Emi;Fujisaki,Seiichiro;Shirakura,Masayuki;Watanabe,Shinji;Hasegawa,Hideki
EPI_ISL_394160	Asia / Japan	2019-09-18	B/MIE/10/2019	Mie Prefecture Health and Environment Research Institute	National Institute of Infectious Diseases (NIID)	Kuwahara,Tomoko;Takashita,Emi;Fujisaki,Seiichiro;Shirakura,Masayuki;Watanabe,Shinji;Hasegawa,Hideki
EPI_ISL_394174	Asia / Japan	2019-06-18	B/SAITAMA/57/2019	Saitama Institute of Public Health	National Institute of Infectious Diseases (NIID)	Kuwahara,Tomoko;Takashita,Emi;Fujisaki,Seiichiro;Shirakura,Masayuki;Watanabe,Shinji;Hasegawa,Hideki
EPI_ISL_394178	Asia / Japan	2019-06-17	B/GIFU/4/2019	Gifu Prefectural Institute of Health and Environmental Sciences	National Institute of Infectious Diseases (NIID)	Kuwahara,Tomoko;Takashita,Emi;Fujisaki,Seiichiro;Shirakura,Masayuki;Watanabe,Shinji;Hasegawa,Hideki
EPI_ISL_394180	Asia / Japan	2019-07-23	B/KAWASAKI/12/2019	Kawasaki City Institute of Public Health	National Institute of Infectious Diseases (NIID)	Kuwahara,Tomoko;Takashita,Emi;Fujisaki,Seiichiro;Shirakura,Masayuki;Watanabe,Shinji;Hasegawa,Hideki
EPI_ISL_394189	Asia / Japan	2019-07-30	B/KOBE/19294/2019	Kobe Institute of Health	National Institute of Infectious Diseases (NIID)	Kuwahara,Tomoko;Takashita,Emi;Fujisaki,Seiichiro;Shirakura,Masayuki;Watanabe,Shinji;Hasegawa,Hideki
EPI_ISL_394192	Asia / Japan	2019-08-05	B/OSAKA/21/2019	Osaka Prefectural Institute of Public Health	National Institute of Infectious Diseases (NIID)	Kuwahara,Tomoko;Takashita,Emi;Fujisaki,Seiichiro;Shirakura,Masayuki;Watanabe,Shinji;Hasegawa,Hideki
EPI_ISL_394197	Asia / Japan	2019-06-17	B/OKINAWA/68/2019	Okinawa Prefectural Institute of Health and Environment	National Institute of Infectious Diseases (NIID)	Kuwahara,Tomoko;Takashita,Emi;Fujisaki,Seiichiro;Shirakura,Masayuki;Watanabe,Shinji;Hasegawa,Hideki
EPI_ISL_394198	Asia / Japan	2019-07-01	B/OKINAWA/73/2019	Okinawa Prefectural Institute of Health and Environment	National Institute of Infectious Diseases (NIID)	Kuwahara,Tomoko;Takashita,Emi;Fujisaki,Seiichiro;Shirakura,Masayuki;Watanabe,Shinji;Hasegawa,Hideki
EPI_ISL_395001	North America / United States / Montana	2019-09-16	B/Montana/15/2019	Montana Laboratory Services Bureau	Centers for Disease Control and Prevention	NA
EPI_ISL_395003	North America / United States / Hawaii	2019-09-07	B/Hawaii/38/2019	State of Hawaii Department of Health	Centers for Disease Control and Prevention	NA
EPI_ISL_395004	North America / United States / Hawaii	2019-09-12	B/Hawaii/39/2019	State of Hawaii Department of Health	Centers for Disease Control and Prevention	NA
EPI_ISL_395018	Africa / Togo	2019-07-29	B/Togo/903/2019	Institute National D'Hygiene	Centers for Disease Control and Prevention	NA
EPI_ISL_395019	Africa / Togo	2019-08-07	B/Togo/951/2019	Institute National D'Hygiene	Centers for Disease Control and Prevention	NA
EPI_ISL_395020	Africa / Togo	2019-08-09	B/Togo/975/2019	Institute National D'Hygiene	Centers for Disease Control and Prevention	NA
EPI_ISL_395026	Asia / Japan	2019-04-27	B/Kanagawa/IC18169/2019	National Institute of Infectious Diseases (NIID)	Centers for Disease Control and Prevention	NA
EPI_ISL_395051	Europe / France	2019-10-04	B/Lyon/1861/2019	CNR Virus des Infections Respiratoires - France SUD	CNR Virus des Infections Respiratoires - France SUD	NA
EPI_ISL_395052	Europe / France	2019-10-08	B/Lyon/CHU_1733987/2019	CNR Virus des Infections Respiratoires - France SUD	CNR Virus des Infections Respiratoires - France SUD	NA
EPI_ISL_395194	Asia / Japan	2019-07-01	B/AICHI/49/2019	Aichi Prefectural Institute of Public Health	National Institute of Infectious Diseases (NIID)	Kuwahara,Tomoko;Takashita,Emi;Fujisaki,Seiichiro;Shirakura,Masayuki;Watanabe,Shinji;Hasegawa,Hideki
EPI_ISL_395222	Asia / Japan	2019-08-23	B/TOKYO/19194/2019	Tokyo Metropolitan Institute of Public Health	National Institute of Infectious Diseases (NIID)	Kuwahara,Tomoko;Takashita,Emi;Fujisaki,Seiichiro;Shirakura,Masayuki;Watanabe,Shinji;Hasegawa,Hideki
EPI_ISL_395299	South America / Bolivia, Plurinationial State of	2019-06-11	B/Bolivia/1133/2019	Instituto Nacional de Laboratoriosde Salud (INLASA)	Centers for Disease Control and Prevention	NA
EPI_ISL_395301	South America / Bolivia, Plurinationial State of	2019-07-11	B/Bolivia/1372/2019	Instituto Nacional de Laboratoriosde Salud (INLASA)	Centers for Disease Control and Prevention	NA
EPI_ISL_395302	South America / Bolivia, Plurinationial State of	2019-06-27	B/Bolivia/1256/2019	Instituto Nacional de Laboratoriosde Salud (INLASA)	Centers for Disease Control and Prevention	NA
EPI_ISL_395507	North America / United States / Hawaii	2019-09-23	B/Hawaii/40/2019	State of Hawaii Department of Health	Centers for Disease Control and Prevention	NA
EPI_ISL_395518	South America / Brazil	2019-07-08	B/Santa Catarina/709/2019	Instituto Oswaldo Cruz FIOCRUZ - Laboratory of Respiratory Viruses and Measles (LVRS)	Centers for Disease Control and Prevention	NA
EPI_ISL_395522	North America / United States / District of Columbia	2019-10-05	B/District Of Columbia/19/2019	DC Public Health Lab	Centers for Disease Control and Prevention	NA
EPI_ISL_395537	Asia / Japan	2019-09-03	B/AICHI/50/2019	Aichi Prefectural Institute of Public Health	National Institute of Infectious Diseases (NIID)	Kuwahara,Tomoko;Takashita,Emi;Fujisaki,Seiichiro;Shirakura,Masayuki;Watanabe,Shinji;Hasegawa,Hideki
EPI_ISL_395540	Asia / Japan	2019-09-27	B/HIROSHIMA/15/2019	Center for Public Health and Environment, Hiroshima Prefectural Technology Research Institute	National Institute of Infectious Diseases (NIID)	Kuwahara,Tomoko;Takashita,Emi;Fujisaki,Seiichiro;Shirakura,Masayuki;Watanabe,Shinji;Hasegawa,Hideki
EPI_ISL_396182	Europe / Norway	2019-07-28	B/Norway/2211/2019	Norwegian Institute of Public Health	Crick Worldwide Influenza Centre	NA
EPI_ISL_396432	Europe / Sweden / Stockholms lan	2019-10-05	B/Stockholm/5/2019	Unilabs Laboratoriemedicin Stockholm Solna	Public Health Agency of Sweden	NA
EPI_ISL_397062	North America / United States / Michigan	2019-10-06	B/Michigan/60/2019	Michigan Department of Community Health	Centers for Disease Control and Prevention	NA
EPI_ISL_397066	Oceania / Australia	2018-10-19	B/Brisbane/35/2018	WHO Collaborating Centre for Reference and Research on Influenza	Centers for Disease Control and Prevention	NA
EPI_ISL_397085	Europe / Norway / Oslo	2019-09-29	B/Norway/2284/2019	Oslo University Hospital, Ulleval Hospital, Dept. of Microbiology	Norwegian Institute of Public Health	Bragstad, K; Hungnes, O
EPI_ISL_397126	Oceania / Australia / Northern Territory	2019-10-03	B/Darwin/151/2019	Influenza Surveillance Centre for Disease Control	WHO Collaborating Centre for Reference and Research on Influenza	Deng,Y-M; Iannello,P; Lau,H; Todd,A; Spirason,N; Moselen,J; Komadina,N.
EPI_ISL_397136	Asia / Bangladesh	2019-07-02	B/Bangladesh/341/2019	Institute of Epidemiology Disease Control and Research (IEDCR) & Bangladesh National Influenza Centre (NIC)	Centers for Disease Control and Prevention	NA
EPI_ISL_397142	North America / United States / Florida	2019-10-14	B/Florida/62/2019	Florida Department of Health-Jacksonville	Centers for Disease Control and Prevention	NA
EPI_ISL_397144	Asia / Bangladesh	2019-08-18	B/Bangladesh/434/2019	Institute of Epidemiology Disease Control and Research (IEDCR) & Bangladesh National Influenza Centre (NIC)	Centers for Disease Control and Prevention	NA
EPI_ISL_397157	North America / Guatemala	2019-06-25	B/Guatemala/9559/2019	Laboratorio Nacional De Salud Guatemala	Centers for Disease Control and Prevention	NA
EPI_ISL_397160	North America / United States / North Dakota	2019-10-24	B/North Dakota/11/2019	North Dakota Department of Health	Centers for Disease Control and Prevention	NA
EPI_ISL_397319	Africa / Mauritius	2019-07-21	B/Mauritius/I-1953/2019	Central Health Laboratory	Crick Worldwide Influenza Centre	NA
EPI_ISL_397322	Europe / Norway	2019-09-29	B/Norway/2284/2019	WHO National Influenza Centre	Crick Worldwide Influenza Centre	NA
EPI_ISL_397323	Europe / Norway	2019-09-27	B/Norway/2286/2019	WHO National Influenza Centre	Crick Worldwide Influenza Centre	NA
EPI_ISL_397324	Asia / Qatar	2019-08-04	B/Qatar/10-VI-19-0045830/2019	Supreme Health Council	Crick Worldwide Influenza Centre	NA
EPI_ISL_397325	Asia / Qatar	2019-08-06	B/Qatar/10-VI-19-0046191/2019	Supreme Health Council	Crick Worldwide Influenza Centre	NA
EPI_ISL_397326	Asia / Qatar	2019-08-20	B/Qatar/10-VI-19-0048096/2019	Supreme Health Council	Crick Worldwide Influenza Centre	NA
EPI_ISL_397327	Asia / Qatar	2019-08-26	B/Qatar/10-VI-19-0049104/2019	Supreme Health Council	Crick Worldwide Influenza Centre	NA
EPI_ISL_397328	Africa / Mauritius	2019	B/Mauritius/I-1940/2019	Central Health Laboratory	Crick Worldwide Influenza Centre	NA
EPI_ISL_398301	Asia / Japan	2019-10-27	B/NIIGATA-C/6/2019	Niigata City Institute of Public Health and Environment	National Institute of Infectious Diseases (NIID)	Kuwahara,Tomoko;Takashita,Emi;Fujisaki,Seiichiro;Shirakura,Masayuki;Watanabe,Shinji;Hasegawa,Hideki
EPI_ISL_398468	South America / Brazil	2019-07-23	B/Rio Grande Do Sul/844/2019	Instituto Oswaldo Cruz FIOCRUZ - Laboratory of Respiratory Viruses and Measles (LVRS)	Centers for Disease Control and Prevention	NA
EPI_ISL_398470	Asia / Bangladesh	2019-06-29	B/Bangladesh/1696/2019	Institute of Epidemiology Disease Control and Research (IEDCR) & Bangladesh National Influenza Centre (NIC)	Centers for Disease Control and Prevention	NA
EPI_ISL_398471	Asia / Bangladesh	2019-08-19	B/Bangladesh/1733/2019	Institute of Epidemiology Disease Control and Research (IEDCR) & Bangladesh National Influenza Centre (NIC)	Centers for Disease Control and Prevention	NA
EPI_ISL_398472	Asia / Bangladesh	2019-08-25	B/Bangladesh/1736/2019	Institute of Epidemiology Disease Control and Research (IEDCR) & Bangladesh National Influenza Centre (NIC)	Centers for Disease Control and Prevention	NA
EPI_ISL_398496	North America / United States / Arizona	2019-10-27	B/Arizona/24/2019	Arizona Department of Health Services	Centers for Disease Control and Prevention	NA
EPI_ISL_398512	North America / United States / Louisiana	2019-10-29	B/Louisiana/31/2019	Louisiana Department of Health and Hospitals	Centers for Disease Control and Prevention	NA
EPI_ISL_398589	Oceania / Australia	2018-10-30	B/Victoria/705/2018	WHO Collaborating Centre for Reference and Research on Influenza	Centers for Disease Control and Prevention	NA
EPI_ISL_398636	Asia / Singapore	2019-07-26	B/Singapore/GP1472/2019	Ministry of Health, Singapore	Ministry of Health, Singapore	Chen,B.;Zhou, Z.; Mak,T.M.; Cui,L; Lin,R.T.P.
EPI_ISL_398637	Asia / Singapore	2019-07-09	B/Singapore/EN0525/2019	Ministry of Health, Singapore	Ministry of Health, Singapore	Chen,B.;Zhou, Z.; Mak,T.M.; Cui,L; Lin,R.T.P.
EPI_ISL_398640	Asia / Singapore	2019-06-13	B/Singapore/TT0442/2019	Ministry of Health, Singapore	Ministry of Health, Singapore	Chen,B.;Zhou, Z.; Mak,T.M.; Cui,L; Lin,R.T.P.
EPI_ISL_398646	Asia / Singapore	2019-07-10	B/Singapore/TT0572/2019	Ministry of Health, Singapore	Ministry of Health, Singapore	Chen,B.;Zhou, Z.; Mak,T.M.; Cui,L; Lin,R.T.P.
EPI_ISL_398657	Asia / Singapore	2019-07-03	B/Singapore/KK1483/2019	Ministry of Health, Singapore	Ministry of Health, Singapore	Chen,B.;Zhou, Z.; Mak,T.M.; Cui,L; Lin,R.T.P.
EPI_ISL_398659	Asia / Singapore	2019-07-05	B/Singapore/KK1515/2019	Ministry of Health, Singapore	Ministry of Health, Singapore	Chen,B.;Zhou, Z.; Mak,T.M.; Cui,L; Lin,R.T.P.
EPI_ISL_398696	Europe / Sweden / Vastra Gotalands lan	2019-11-06	B/Skovde/1/2019	Unilabs Laboratoriemedicin Vastra Gotaland, Skaraborgs sjukhus Skovde	Public Health Agency of Sweden	NA
EPI_ISL_398899	Asia / Bangladesh	2019-07-01	B/Bangladesh/458/2019	Institute of Epidemiology Disease Control and Research (IEDCR) & Bangladesh National Influenza Centre (NIC)	Centers for Disease Control and Prevention	NA
EPI_ISL_398924	North America / United States / Florida	2019-10-08	B/Florida/63/2019	Florida Department of Health-Tampa	Centers for Disease Control and Prevention	NA
EPI_ISL_398925	North America / United States / Florida	2019-10-30	B/Florida/66/2019	Florida Department of Health-Jacksonville	Centers for Disease Control and Prevention	NA
EPI_ISL_399771	Europe / United Kingdom / MANCHESTER	2019-08-19	B/England/93480276/2019	Microbiology Services Colindale, Public Health England	Microbiology Services Colindale, Public Health England	Thompson,C.
EPI_ISL_399773	Europe / United Kingdom / LEEDS	2019-09-22	B/England/193920598/2019	Microbiology Services Colindale, Public Health England	Microbiology Services Colindale, Public Health England	Thompson,C.
EPI_ISL_399774	Europe / United Kingdom / POOLE	2019-09-20	B/England/193940694/2019	Microbiology Services Colindale, Public Health England	Microbiology Services Colindale, Public Health England	Thompson,C.
EPI_ISL_399790	Europe / United Kingdom / LEICESTER	2019-07-07	B/England/92840642/2019	Microbiology Services Colindale, Public Health England	Microbiology Services Colindale, Public Health England	Thompson,C.
EPI_ISL_399794	Europe / United Kingdom / MANCHESTER	2019-07-26	B/England/287/2019	Microbiology Services Colindale, Public Health England	Microbiology Services Colindale, Public Health England	Thompson,C.
EPI_ISL_399797	Europe / United Kingdom / MANCHESTER	2019-08-07	B/England/293/2019	Microbiology Services Colindale, Public Health England	Microbiology Services Colindale, Public Health England	Thompson,C.
EPI_ISL_399798	Europe / United Kingdom / MANCHESTER	2019-08-08	B/England/93320735/2019	Microbiology Services Colindale, Public Health England	Microbiology Services Colindale, Public Health England	Thompson,C.
EPI_ISL_399805	Europe / United Kingdom / POOLE	2019-09-19	B/England/193940697/2019	Microbiology Services Colindale, Public Health England	Microbiology Services Colindale, Public Health England	Thompson,C.
EPI_ISL_399819	Europe / United Kingdom / LEEDS	2019-10-15	B/England/194280525/2019	Microbiology Services Colindale, Public Health England	Microbiology Services Colindale, Public Health England	Thompson,C.
EPI_ISL_400127	Europe / Finland	2019-08-14	B/Finland/124/2019	National Institute for Health and Welfare	National Institute for Health and Welfare	Ikonen,N; Haveri, A
EPI_ISL_400164	Asia / Bhutan	2019-08-15	B/Bhutan/199/2019	Royal Centre for Disease Control	Centers for Disease Control and Prevention	NA
EPI_ISL_400166	Asia / Bhutan	2019-08-15	B/Bhutan/196/2019	Royal Centre for Disease Control	Centers for Disease Control and Prevention	NA
EPI_ISL_400169	Asia / Bhutan	2019-08-24	B/Bhutan/191/2019	Royal Centre for Disease Control	Centers for Disease Control and Prevention	NA
EPI_ISL_400170	Asia / Bhutan	2019-08-24	B/Bhutan/188/2019	Royal Centre for Disease Control	Centers for Disease Control and Prevention	NA
EPI_ISL_400172	Asia / Bhutan	2019-09-11	B/Bhutan/229/2019	Royal Centre for Disease Control	Centers for Disease Control and Prevention	NA
EPI_ISL_400175	Asia / Bhutan	2019-09-19	B/Bhutan/236/2019	Royal Centre for Disease Control	Centers for Disease Control and Prevention	NA
EPI_ISL_400176	Asia / Bhutan	2019-09-12	B/Bhutan/235/2019	Royal Centre for Disease Control	Centers for Disease Control and Prevention	NA
EPI_ISL_400178	Asia / Bhutan	2019-07-10	B/Bhutan/230/2019	Royal Centre for Disease Control	Centers for Disease Control and Prevention	NA
EPI_ISL_400195	North America / United States / Maryland	2019-11-06	B/Maryland/24/2019	Maryland Department of Health and Mental Hygiene	Centers for Disease Control and Prevention	NA
EPI_ISL_400219	North America / United States / Alaska	2019-11-07	B/Alaska/12/2019	Alaska State Virology Lab	Centers for Disease Control and Prevention	NA
EPI_ISL_400222	North America / United States / California	2019-11-06	B/California/61/2019	California Department of Health Services	Centers for Disease Control and Prevention	NA
EPI_ISL_400244	North America / United States / Nevada	2019-11-13	B/Nevada/10/2019	Nevada State Health Laboratory	Centers for Disease Control and Prevention	NA
EPI_ISL_400254	North America / United States / California	2019-11-19	B/California/66/2019	California Department of Health Services	Centers for Disease Control and Prevention	NA
EPI_ISL_400339	Europe / France / Ile de France	2019-11-18	B/Paris/2515/2019	Institut Pasteur	Institut Pasteur	NA
EPI_ISL_400396	Europe / Norway / Hedmark	2019-11-07	B/Norway/2426/2019	Innlandet Hospital Trust, Division Lillehammer, Department for Microbiology	Norwegian Institute of Public Health	Bragstad, K; Hungnes, O
EPI_ISL_400560	Asia / Japan	2019-09-29	B/EHIME/6/2019	Ehime Prefecture Institute of Public Health and Environmental Science	National Institute of Infectious Diseases (NIID)	Kuwahara,Tomoko;Takashita,Emi;Fujisaki,Seiichiro;Shirakura,Masayuki;Watanabe,Shinji;Hasegawa,Hideki
EPI_ISL_400585	Asia / Japan	2019-11-12	B/NAGANO/2773/2019	Nagano Environmental Conservation Research Institute	National Institute of Infectious Diseases (NIID)	Kuwahara,Tomoko;Takashita,Emi;Fujisaki,Seiichiro;Shirakura,Masayuki;Watanabe,Shinji;Hasegawa,Hideki
EPI_ISL_400654	Asia / Singapore	2019-09-03	B/Singapore/GP1713/2019	Ministry of Health, Singapore	Ministry of Health, Singapore	Chen,B.; Zhou, Z.; Mak,T.M.; Cui,L; Lin,R.T.P.
EPI_ISL_400660	Asia / Singapore	2019-08-19	B/Singapore/NUH0031/2019	Ministry of Health, Singapore	Ministry of Health, Singapore	Chen,B.; Zhou, Z.; Mak,T.M.; Cui,L; Lin,R.T.P.
EPI_ISL_400661	Asia / Singapore	2019-08-19	B/Singapore/NUH0030/2019	Ministry of Health, Singapore	Ministry of Health, Singapore	Chen,B.; Zhou, Z.; Mak,T.M.; Cui,L; Lin,R.T.P.
EPI_ISL_401036	South America / Bolivia, Plurinationial State of	2019-07-11	B/Bolivia/1372/2019	Instituto Nacional de Laboratoriosde Salud (INLASA)	Centers for Disease Control and Prevention	NA
EPI_ISL_401049	Asia / Bangladesh	2019-10-20	B/Bangladesh/511/2019	Institute of Epidemiology Disease Control and Research (IEDCR) & Bangladesh National Influenza Centre (NIC)	Centers for Disease Control and Prevention	NA
EPI_ISL_401051	Asia / Bangladesh	2019-10-09	B/Bangladesh/8008/2019	icddr,b International Centre for Diarrhoeal Disease Research, Bangladesh	Centers for Disease Control and Prevention	NA
EPI_ISL_401052	Asia / Bangladesh	2019-09-22	B/Bangladesh/4024/2019	icddr,b International Centre for Diarrhoeal Disease Research, Bangladesh	Centers for Disease Control and Prevention	NA
EPI_ISL_401053	Asia / Bangladesh	2019-08-27	B/Bangladesh/1017/2019	icddr,b International Centre for Diarrhoeal Disease Research, Bangladesh	Centers for Disease Control and Prevention	NA
EPI_ISL_401054	Asia / Bangladesh	2019-10-12	B/Bangladesh/1771/2019	Institute of Epidemiology Disease Control and Research (IEDCR) & Bangladesh National Influenza Centre (NIC)	Centers for Disease Control and Prevention	NA
EPI_ISL_401056	Asia / Bangladesh	2019-10-09	B/Bangladesh/525/2019	Institute of Epidemiology Disease Control and Research (IEDCR) & Bangladesh National Influenza Centre (NIC)	Centers for Disease Control and Prevention	NA
EPI_ISL_401113	North America / United States / Indiana	2019-11-19	B/Indiana/14/2019	Indiana State Department of Health Laboratories	Centers for Disease Control and Prevention	NA
EPI_ISL_401213	Africa / Togo	2019-09-03	B/Togo/1071/2019	Institute National D'Hygiene	Centers for Disease Control and Prevention	NA
EPI_ISL_401220	North America / United States / Indiana	2019-11-19	B/Indiana/14/2019	Indiana State Department of Health Laboratories	Centers for Disease Control and Prevention	NA
EPI_ISL_401237	Asia / Bangladesh	2019-07-02	B/Bangladesh/341/2019	Institute of Epidemiology Disease Control and Research (IEDCR) & Bangladesh National Influenza Centre (NIC)	Centers for Disease Control and Prevention	NA
EPI_ISL_401267	North America / United States / Florida	2019-10-30	B/Florida/66/2019	Florida Department of Health-Jacksonville	Centers for Disease Control and Prevention	NA
EPI_ISL_401269	North America / United States / Florida	2019-10-08	B/Florida/63/2019	Florida Department of Health-Tampa	Centers for Disease Control and Prevention	NA
EPI_ISL_401279	Asia / Bangladesh	2019-10-05	B/Bangladesh/1121/2019	Institute of Epidemiology Disease Control and Research (IEDCR) & Bangladesh National Influenza Centre (NIC)	Centers for Disease Control and Prevention	NA
EPI_ISL_401282	North America / Canada	2019-06-19	B/Manitoba/RV2383/2019	National Microbiology Laboratory, Public Health Agency of Canada (PHAC)	Centers for Disease Control and Prevention	NA
EPI_ISL_401286	Asia / Bangladesh	2019-09-29	B/Bangladesh/3026/2019	icddr,b International Centre for Diarrhoeal Disease Research, Bangladesh	Centers for Disease Control and Prevention	NA
EPI_ISL_401289	Asia / Bangladesh	2019-10-09	B/Bangladesh/524/2019	Institute of Epidemiology Disease Control and Research (IEDCR) & Bangladesh National Influenza Centre (NIC)	Centers for Disease Control and Prevention	NA
EPI_ISL_401291	Asia / Bangladesh	2019-10-24	B/Bangladesh/4004/2019	icddr,b International Centre for Diarrhoeal Disease Research, Bangladesh	Centers for Disease Control and Prevention	NA
EPI_ISL_401311	Africa / Togo	2019-09-27	B/Togo/1251/2019	Institute National D'Hygiene	Centers for Disease Control and Prevention	NA
EPI_ISL_401371	Europe / France / Alsace	2019-12-11	B/Alsace/2705/2019	Institut Pasteur	Institut Pasteur	NA
EPI_ISL_401436	Asia / Singapore	2019-12-06	B/Singapore/KK2856/2019	Ministry of Health, Singapore	Ministry of Health, Singapore	Chen,B.;Zhou, Z.; Mak,T.M.; Cui,L; Lin,R.T.P.
EPI_ISL_401440	Asia / Singapore	2019-12-02	B/Singapore/KK2800/2019	Ministry of Health, Singapore	Ministry of Health, Singapore	Chen,B.;Zhou, Z.; Mak,T.M.; Cui,L; Lin,R.T.P.
EPI_ISL_401446	Asia / Singapore	2019-11-20	B/Singapore/TT0921/2019	Ministry of Health, Singapore	Ministry of Health, Singapore	Chen,B.;Zhou, Z.; Mak,T.M.; Cui,L; Lin,R.T.P.
EPI_ISL_401649	Asia / Oman	2019-09-26	B/Khasab/5820/2019	Central Public Health Laboratory, Ministry of Health	Crick Worldwide Influenza Centre	NA
EPI_ISL_401656	Asia / Oman	2019-09-29	B/Muscat/5733/2019	Central Public Health Laboratory, Ministry of Health	Crick Worldwide Influenza Centre	NA
EPI_ISL_401657	Asia / Oman	2019-10-02	B/Muscat/5812/2019	Central Public Health Laboratory, Ministry of Health	Crick Worldwide Influenza Centre	NA
EPI_ISL_401658	Asia / Oman	2019-10-21	B/Muscat/6666/2019	Central Public Health Laboratory, Ministry of Health	Crick Worldwide Influenza Centre	NA
EPI_ISL_401665	Europe / Portugal	2019-11-24	B/Porto/117/2019	Instituto Nacional de Saude (INSA)	Crick Worldwide Influenza Centre	NA
EPI_ISL_401672	Asia / Oman	2019-09-26	B/Salalah/5670/2019	Central Public Health Laboratory, Ministry of Health	Crick Worldwide Influenza Centre	NA
EPI_ISL_401675	Asia / Oman	2019-10-30	B/Salalah/7060/2019	Central Public Health Laboratory, Ministry of Health	Crick Worldwide Influenza Centre	NA
EPI_ISL_401728	Africa / Mauritius	2019	B/Mauritius/I-1862/2019	Central Health Laboratory	Crick Worldwide Influenza Centre	NA
EPI_ISL_401731	Asia / Qatar	2019-08-04	B/Qatar/10-VI-19-0045830/2019	Supreme Health Council	Crick Worldwide Influenza Centre	NA
EPI_ISL_401732	Asia / Qatar	2019-08-05	B/Qatar/10-VI-19-0045921/2019	Supreme Health Council	Crick Worldwide Influenza Centre	NA
EPI_ISL_401733	Asia / Qatar	2019-08-06	B/Qatar/10-VI-19-0046169/2019	Supreme Health Council	Crick Worldwide Influenza Centre	NA
EPI_ISL_401734	Asia / Qatar	2019-08-06	B/Qatar/10-VI-19-0046191/2019	Supreme Health Council	Crick Worldwide Influenza Centre	NA
EPI_ISL_401735	Asia / Qatar	2019-08-20	B/Qatar/10-VI-19-0048096/2019	Supreme Health Council	Crick Worldwide Influenza Centre	NA
EPI_ISL_401736	Asia / Qatar	2019-08-26	B/Qatar/10-VI-19-0049104/2019	Supreme Health Council	Crick Worldwide Influenza Centre	NA
EPI_ISL_401737	Asia / Qatar	2019-08-04	B/Qatar/16-VI-19-0045885/2019	Supreme Health Council	Crick Worldwide Influenza Centre	NA
EPI_ISL_401738	Asia / Qatar	2019-08-18	B/Qatar/16-VI-19-0047470/2019	Supreme Health Council	Crick Worldwide Influenza Centre	NA
EPI_ISL_401739	Asia / Qatar	2019-08-04	B/Qatar/24-VI-19-0045756/2019	Supreme Health Council	Crick Worldwide Influenza Centre	NA
EPI_ISL_401850	Oceania / Australia / Gold Coast	2015-04-28	B/Brisbane/46/2015	Queensland Health Forensic and Scientific Services	WHO Collaborating Centre for Reference and Research on Influenza	Deng,Y-M; Iannello,P; Lau,H; Todd,A; Spirason,N; Moselen,J; Komadina,N.
EPI_ISL_401853	Oceania / Australia / Victoria / Glen Waverley	2019-11-29	B/Victoria/2110/2019	Alfred Hospital	WHO Collaborating Centre for Reference and Research on Influenza	Deng,Y-M; Iannello,P; Lau,H; Todd,A; Spirason,N; Moselen,J; Komadina,N.
EPI_ISL_401854	Oceania / Australia / Victoria / Mentone	2019-11-15	B/Victoria/2113/2019	Alfred Hospital	WHO Collaborating Centre for Reference and Research on Influenza	Deng,Y-M; Iannello,P; Lau,H; Todd,A; Spirason,N; Moselen,J; Komadina,N.
EPI_ISL_401908	Oceania / Australia / Northern Territory / Alice Springs	2019-12-02	B/Darwin/189/2019	Influenza Surveillance Centre for Disease Control	WHO Collaborating Centre for Reference and Research on Influenza	Deng,Y-M; Iannello,P; Lau,H; Todd,A; Spirason,N; Moselen,J; Komadina,N.
EPI_ISL_401909	Oceania / Australia / Victoria	2019-11-27	B/Victoria/2111/2019	Alfred Hospital	WHO Collaborating Centre for Reference and Research on Influenza	Deng,Y-M; Iannello,P; Lau,H; Todd,A; Spirason,N; Moselen,J; Komadina,N.
EPI_ISL_401910	Oceania / Australia / Victoria	2019-11-02	B/Victoria/2116/2019	Alfred Hospital	WHO Collaborating Centre for Reference and Research on Influenza	Deng,Y-M; Iannello,P; Lau,H; Todd,A; Spirason,N; Moselen,J; Komadina,N.
EPI_ISL_401911	Oceania / Australia / South Australia / Adelaide	2019-12-04	B/South Australia/159/2019	Institute of Medical and Veterinary Science (IMVS)	WHO Collaborating Centre for Reference and Research on Influenza	Deng,Y-M; Iannello,P; Lau,H; Todd,A; Spirason,N; Moselen,J; Komadina,N.
EPI_ISL_401912	Oceania / Australia / South Australia / Whyalla	2019-12-06	B/South Australia/160/2019	Institute of Medical and Veterinary Science (IMVS)	WHO Collaborating Centre for Reference and Research on Influenza	Deng,Y-M; Iannello,P; Lau,H; Todd,A; Spirason,N; Moselen,J; Komadina,N.
EPI_ISL_401920	Oceania / New Zealand / Auckland	2019-09-11	B/Wellington/108/2019	Institute of Environmental Science and Research (ESR)	WHO Collaborating Centre for Reference and Research on Influenza	Deng,Y-M; Iannello,P; Lau,H; Todd,A; Spirason,N; Moselen,J; Komadina,N.
EPI_ISL_401925	Oceania / Australia / Victoria / South Melbourne	2019-09-23	B/Victoria/2070/2019	Alfred Hospital	WHO Collaborating Centre for Reference and Research on Influenza	Deng,Y-M; Iannello,P; Lau,H; Todd,A; Spirason,N; Moselen,J; Komadina,N.
EPI_ISL_401927	Oceania / Australia / Queensland / Forest Lake	2019-09-01	B/Brisbane/27/2019	Queensland Health Forensic and Scientific Services	WHO Collaborating Centre for Reference and Research on Influenza	Deng,Y-M; Iannello,P; Lau,H; Todd,A; Spirason,N; Moselen,J; Komadina,N.
EPI_ISL_401929	Oceania / Australia / Australian Capital Territory / Giralang	2019-09-09	B/Canberra/65/2019	Canberra Hospital	WHO Collaborating Centre for Reference and Research on Influenza	Deng,Y-M; Iannello,P; Lau,H; Todd,A; Spirason,N; Moselen,J; Komadina,N.
EPI_ISL_401939	Oceania / Australia / South Australia / Oakden	2019-09-28	B/South Australia/122/2019	Institute of Medical and Veterinary Science (IMVS)	WHO Collaborating Centre for Reference and Research on Influenza	Deng,Y-M; Iannello,P; Lau,H; Todd,A; Spirason,N; Moselen,J; Komadina,N.
EPI_ISL_401940	Oceania / Australia / South Australia / Adelaide	2019-09-29	B/South Australia/123/2019	Institute of Medical and Veterinary Science (IMVS)	WHO Collaborating Centre for Reference and Research on Influenza	Deng,Y-M; Iannello,P; Lau,H; Todd,A; Spirason,N; Moselen,J; Komadina,N.
EPI_ISL_401943	Oceania / Australia / Tasmania / Wynyard	2019-09-10	B/Tasmania/512/2019	Hobart Pathology	WHO Collaborating Centre for Reference and Research on Influenza	Deng,Y-M; Iannello,P; Lau,H; Todd,A; Spirason,N; Moselen,J; Komadina,N.
EPI_ISL_401988	Oceania / Australia / New South Wales / Mooroolbark	2019-11-09	B/Victoria/2546/2019	Royal Chidrens Hospital	WHO Collaborating Centre for Reference and Research on Influenza	Deng,Y-M; Iannello,P; Lau,H; Todd,A; Spirason,N; Moselen,J; Komadina,N.
EPI_ISL_401991	Oceania / Australia / Victoria / Parkdale	2019-10-14	B/Victoria/2096/2019	Alfred Hospital	WHO Collaborating Centre for Reference and Research on Influenza	Deng,Y-M; Iannello,P; Lau,H; Todd,A; Spirason,N; Moselen,J; Komadina,N.
EPI_ISL_402065	Oceania / Australia / Victoria / Spotswood	2019-09-06	B/Victoria/40/2019	Victorian Infectious Diseases Reference Laboratory	WHO Collaborating Centre for Reference and Research on Influenza	Deng,Y-M; Iannello,P; Lau,H; Todd,A; Spirason,N; Moselen,J; Komadina,N.
EPI_ISL_402073	Oceania / Australia / Victoria / Newport	2019-10-08	B/Victoria/47/2019	Victorian Infectious Diseases Reference Laboratory	WHO Collaborating Centre for Reference and Research on Influenza	Deng,Y-M; Iannello,P; Lau,H; Todd,A; Spirason,N; Moselen,J; Komadina,N.
EPI_ISL_402135	Asia / China / Shanghai	2019-11-17	B/Shanghai-Minxing/1928/2019	WHO Chinese National Influenza Center	WHO Chinese National Influenza Center	Xiaoxu,Zeng;Xiyan,Li;Weijuan,Huang;Lei,Yang;Dayan,Wang;Yuelong,Shu
EPI_ISL_402136	Asia / China / Tianjin	2019-11-05	B/Tianjin-Hedong/1507/2019	WHO Chinese National Influenza Center	WHO Chinese National Influenza Center	Xiaoxu,Zeng;Xiyan,Li;Weijuan,Huang;Lei,Yang;Dayan,Wang;Yuelong,Shu
EPI_ISL_402137	Asia / China / Tianjin	2019-12-04	B/Tianjin-Nankai/11134/2019	WHO Chinese National Influenza Center	WHO Chinese National Influenza Center	Xiaoxu,Zeng;Xiyan,Li;Weijuan,Huang;Lei,Yang;Dayan,Wang;Yuelong,Shu
EPI_ISL_402138	Asia / China / Shandong	2019-12-05	B/Shandong-Dongying/1593/2019	WHO Chinese National Influenza Center	WHO Chinese National Influenza Center	Xiaoxu,Zeng;Xiyan,Li;Weijuan,Huang;Lei,Yang;Dayan,Wang;Yuelong,Shu
EPI_ISL_402139	Asia / China / Shandong	2019-12-05	B/Shandong-Huancui/11225/2019	WHO Chinese National Influenza Center	WHO Chinese National Influenza Center	Xiaoxu,Zeng;Xiyan,Li;Weijuan,Huang;Lei,Yang;Dayan,Wang;Yuelong,Shu
EPI_ISL_402140	Asia / China / Chongqing	2019-12-06	B/Chongqing-Yuzhong/12001/2019	WHO Chinese National Influenza Center	WHO Chinese National Influenza Center	Xiaoxu,Zeng;Xiyan,Li;Weijuan,Huang;Lei,Yang;Dayan,Wang;Yuelong,Shu
EPI_ISL_402141	Asia / China / Chongqing	2019-12-09	B/Chongqing-Yuzhong/3165/2019	WHO Chinese National Influenza Center	WHO Chinese National Influenza Center	Xiaoxu,Zeng;Xiyan,Li;Weijuan,Huang;Lei,Yang;Dayan,Wang;Yuelong,Shu
EPI_ISL_402142	Asia / China / Hubei	2019-12-04	B/Hubei-Xiantao/2405/2019	WHO Chinese National Influenza Center	WHO Chinese National Influenza Center	Xiaoxu,Zeng;Xiyan,Li;Weijuan,Huang;Lei,Yang;Dayan,Wang;Yuelong,Shu
EPI_ISL_402143	Asia / China	2019-12-07	B/Jiangsu-Yixin/349/2019	WHO Chinese National Influenza Center	WHO Chinese National Influenza Center	Xiaoxu,Zeng;Xiyan,Li;Weijuan,Huang;Lei,Yang;Dayan,Wang;Yuelong,Shu
EPI_ISL_402144	Asia / China / Shandong	2019-12-02	B/Shandong-Jiaxiang/311/2019	WHO Chinese National Influenza Center	WHO Chinese National Influenza Center	Xiaoxu,Zeng;Xiyan,Li;Weijuan,Huang;Lei,Yang;Dayan,Wang;Yuelong,Shu
EPI_ISL_402145	Asia / China / Jiangsu	2019-12-10	B/Jiangsu-Quanshan/11973/2019	WHO Chinese National Influenza Center	WHO Chinese National Influenza Center	Xiaoxu,Zeng;Xiyan,Li;Weijuan,Huang;Lei,Yang;Dayan,Wang;Yuelong,Shu
EPI_ISL_402146	Asia / China / Chongqing	2019-12-02	B/Chongqing-Qianjiang/3140/2019	WHO Chinese National Influenza Center	WHO Chinese National Influenza Center	Xiaoxu,Zeng;Xiyan,Li;Weijuan,Huang;Lei,Yang;Dayan,Wang;Yuelong,Shu
EPI_ISL_402147	Asia / China	2019-12-02	B/Xinjiang-Yining/1613/2019	WHO Chinese National Influenza Center	WHO Chinese National Influenza Center	Xiaoxu,Zeng;Xiyan,Li;Weijuan,Huang;Lei,Yang;Dayan,Wang;Yuelong,Shu
EPI_ISL_402148	Asia / China / Yunnan	2019-11-26	B/Yunnan-Longchuan/345/2019	WHO Chinese National Influenza Center	WHO Chinese National Influenza Center	Xiaoxu,Zeng;Xiyan,Li;Weijuan,Huang;Lei,Yang;Dayan,Wang;Yuelong,Shu
EPI_ISL_402149	Asia / China / Henan	2019-12-10	B/Henan-Chuanhui/1661/2019	WHO Chinese National Influenza Center	WHO Chinese National Influenza Center	Xiaoxu,Zeng;Xiyan,Li;Weijuan,Huang;Lei,Yang;Dayan,Wang;Yuelong,Shu
EPI_ISL_402150	Asia / China / Hubei	2019-12-05	B/Hubei-Hanyang/311/2019	WHO Chinese National Influenza Center	WHO Chinese National Influenza Center	Xiaoxu,Zeng;Xiyan,Li;Weijuan,Huang;Lei,Yang;Dayan,Wang;Yuelong,Shu
EPI_ISL_402151	Asia / China / Tianjin	2019-11-25	B/Tianjin-Nankai/11093/2019	WHO Chinese National Influenza Center	WHO Chinese National Influenza Center	Xiaoxu,Zeng;Xiyan,Li;Weijuan,Huang;Lei,Yang;Dayan,Wang;Yuelong,Shu
EPI_ISL_402186	Asia / China	2019-10-29	B/Shanghai-Jinshan/1885/2019	WHO Chinese National Influenza Center	WHO Chinese National Influenza Center	Xiaoxu,Zeng;Xiyan,Li;Weijuan,Huang;Lei,Yang;Dayan,Wang;Yuelong,Shu
EPI_ISL_402187	Asia / China / Guizhou	2019-11-12	B/Guizhou-Xinyi/1910/2019	WHO Chinese National Influenza Center	WHO Chinese National Influenza Center	Xiaoxu,Zeng;Xiyan,Li;Weijuan,Huang;Lei,Yang;Dayan,Wang;Yuelong,Shu
EPI_ISL_402188	Asia / China / Xinjiang	2019-11-21	B/Xinjiang-Tianshan/11350/2019	WHO Chinese National Influenza Center	WHO Chinese National Influenza Center	Xiaoxu,Zeng;Xiyan,Li;Weijuan,Huang;Lei,Yang;Dayan,Wang;Yuelong,Shu
EPI_ISL_402189	Asia / China / Sichuan	2019-11-10	B/Sichuan-Yanjiang/1914/2019	WHO Chinese National Influenza Center	WHO Chinese National Influenza Center	Xiaoxu,Zeng;Xiyan,Li;Weijuan,Huang;Lei,Yang;Dayan,Wang;Yuelong,Shu
EPI_ISL_402190	Asia / China / Jiangxi	2019-11-10	B/Jiangxi-Anyuan/1958/2019	WHO Chinese National Influenza Center	WHO Chinese National Influenza Center	Xiaoxu,Zeng;Xiyan,Li;Weijuan,Huang;Lei,Yang;Dayan,Wang;Yuelong,Shu
EPI_ISL_402191	Asia / China / Zhejiang	2019-11-12	B/Zhejiang-Nanxun/1917/2019	WHO Chinese National Influenza Center	WHO Chinese National Influenza Center	Xiaoxu,Zeng;Xiyan,Li;Weijuan,Huang;Lei,Yang;Dayan,Wang;Yuelong,Shu
EPI_ISL_402192	Asia / China / Zhejiang	2019-11-06	B/Zhejiang-Yuecheng/11207/2019	WHO Chinese National Influenza Center	WHO Chinese National Influenza Center	Xiaoxu,Zeng;Xiyan,Li;Weijuan,Huang;Lei,Yang;Dayan,Wang;Yuelong,Shu
EPI_ISL_402193	Asia / China / Shanghai	2019-11-12	B/Shanghai-Songjiang/1923/2019	WHO Chinese National Influenza Center	WHO Chinese National Influenza Center	Xiaoxu,Zeng;Xiyan,Li;Weijuan,Huang;Lei,Yang;Dayan,Wang;Yuelong,Shu
EPI_ISL_402194	Asia / China / Zhejiang	2019-11-17	B/Zhejiang-Jiaojiang/11018/2019	WHO Chinese National Influenza Center	WHO Chinese National Influenza Center	Xiaoxu,Zeng;Xiyan,Li;Weijuan,Huang;Lei,Yang;Dayan,Wang;Yuelong,Shu
EPI_ISL_402195	Asia / China / Zhejiang	2019-11-17	B/Zhejiang-Linhai/11097/2019	WHO Chinese National Influenza Center	WHO Chinese National Influenza Center	Xiaoxu,Zeng;Xiyan,Li;Weijuan,Huang;Lei,Yang;Dayan,Wang;Yuelong,Shu
EPI_ISL_402196	Asia / China / Jiangsu	2019-11-25	B/Jiangsu-Tinghu/11906/2019	WHO Chinese National Influenza Center	WHO Chinese National Influenza Center	Xiaoxu,Zeng;Xiyan,Li;Weijuan,Huang;Lei,Yang;Dayan,Wang;Yuelong,Shu
EPI_ISL_402197	Asia / China / Guizhou	2019-11-25	B/Guizhou-Honghuagang/1965/2019	WHO Chinese National Influenza Center	WHO Chinese National Influenza Center	Xiaoxu,Zeng;Xiyan,Li;Weijuan,Huang;Lei,Yang;Dayan,Wang;Yuelong,Shu
EPI_ISL_402198	Asia / China / Guangdong	2019-11-21	B/Guangdong-Huicheng/1943/2019	WHO Chinese National Influenza Center	WHO Chinese National Influenza Center	Xiaoxu,Zeng;Xiyan,Li;Weijuan,Huang;Lei,Yang;Dayan,Wang;Yuelong,Shu
EPI_ISL_402199	Asia / China / Sichuan	2019-11-26	B/Sichuan-Jingyang/12048/2019	WHO Chinese National Influenza Center	WHO Chinese National Influenza Center	Xiaoxu,Zeng;Xiyan,Li;Weijuan,Huang;Lei,Yang;Dayan,Wang;Yuelong,Shu
EPI_ISL_402200	Asia / China / Hunan	2019-11-29	B/Hunan-Jiahe/327/2019	WHO Chinese National Influenza Center	WHO Chinese National Influenza Center	Xiaoxu,Zeng;Xiyan,Li;Weijuan,Huang;Lei,Yang;Dayan,Wang;Yuelong,Shu
EPI_ISL_402229	Asia / China / Yunnan	2019-11-18	B/Yunnan-Wenshan/1962/2019	WHO Chinese National Influenza Center	WHO Chinese National Influenza Center	Xiaoxu,Zeng;Xiyan,Li;Weijuan,Huang;Lei,Yang;Dayan,Wang;Yuelong,Shu
EPI_ISL_402230	Asia / China / Hunan	2019-11-04	B/Hunan-Heshan/1926/2019	WHO Chinese National Influenza Center	WHO Chinese National Influenza Center	Xiaoxu,Zeng;Xiyan,Li;Weijuan,Huang;Lei,Yang;Dayan,Wang;Yuelong,Shu
EPI_ISL_402231	Asia / China / Sichuan	2019-10-14	B/Sichuan-Shunqing/1725/2019	WHO Chinese National Influenza Center	WHO Chinese National Influenza Center	Xiaoxu,Zeng;Xiyan,Li;Weijuan,Huang;Lei,Yang;Dayan,Wang;Yuelong,Shu
EPI_ISL_402232	Asia / China / Sichuan	2019-11-03	B/Sichuan-Yanjiang/1889/2019	WHO Chinese National Influenza Center	WHO Chinese National Influenza Center	Xiaoxu,Zeng;Xiyan,Li;Weijuan,Huang;Lei,Yang;Dayan,Wang;Yuelong,Shu
EPI_ISL_402233	Asia / China / Shaanxi	2019-10-30	B/Shaanxi-Xincheng/11453/2019	WHO Chinese National Influenza Center	WHO Chinese National Influenza Center	Xiaoxu,Zeng;Xiyan,Li;Weijuan,Huang;Lei,Yang;Dayan,Wang;Yuelong,Shu
EPI_ISL_402234	Asia / China / Chongqing	2019-11-06	B/Chongqing-Banan/321/2019	WHO Chinese National Influenza Center	WHO Chinese National Influenza Center	Xiaoxu,Zeng;Xiyan,Li;Weijuan,Huang;Lei,Yang;Dayan,Wang;Yuelong,Shu
EPI_ISL_402235	Asia / China / Jiangxi	2019-10-22	B/Jiangxi-Yuanzhou/11696/2019	WHO Chinese National Influenza Center	WHO Chinese National Influenza Center	Xiaoxu,Zeng;Xiyan,Li;Weijuan,Huang;Lei,Yang;Dayan,Wang;Yuelong,Shu
EPI_ISL_402236	Asia / China / Sichuan	2019-10-31	B/Sichuan-Guangan/1829/2019	WHO Chinese National Influenza Center	WHO Chinese National Influenza Center	Xiaoxu,Zeng;Xiyan,Li;Weijuan,Huang;Lei,Yang;Dayan,Wang;Yuelong,Shu
EPI_ISL_402237	Asia / China / Sichuan	2019-10-31	B/Sichuan-Guangan/1829/2019	WHO Chinese National Influenza Center	WHO Chinese National Influenza Center	Xiaoxu,Zeng;Xiyan,Li;Weijuan,Huang;Lei,Yang;Dayan,Wang;Yuelong,Shu
EPI_ISL_402238	Asia / China / Sichuan	2019-11-10	B/Sichuan-Yanjiang/1914/2019	WHO Chinese National Influenza Center	WHO Chinese National Influenza Center	Xiaoxu,Zeng;Xiyan,Li;Weijuan,Huang;Lei,Yang;Dayan,Wang;Yuelong,Shu
EPI_ISL_402239	Asia / China / Sichuan	2019-11-14	B/Sichuan-Cuiping/1974/2019	WHO Chinese National Influenza Center	WHO Chinese National Influenza Center	Xiaoxu,Zeng;Xiyan,Li;Weijuan,Huang;Lei,Yang;Dayan,Wang;Yuelong,Shu
EPI_ISL_402240	Asia / China / Hubei	2019-10-31	B/Hubei-Duodao/1857/2019	WHO Chinese National Influenza Center	WHO Chinese National Influenza Center	Xiaoxu,Zeng;Xiyan,Li;Weijuan,Huang;Lei,Yang;Dayan,Wang;Yuelong,Shu
EPI_ISL_402241	Asia / China / Zhejiang	2019-11-11	B/Zhejiang-Lucheng/11036/2019	WHO Chinese National Influenza Center	WHO Chinese National Influenza Center	Xiaoxu,Zeng;Xiyan,Li;Weijuan,Huang;Lei,Yang;Dayan,Wang;Yuelong,Shu
EPI_ISL_402242	Asia / China / Yunnan	2019-11-06	B/Yunnan-Yingjiang/364/2019	WHO Chinese National Influenza Center	WHO Chinese National Influenza Center	Xiaoxu,Zeng;Xiyan,Li;Weijuan,Huang;Lei,Yang;Dayan,Wang;Yuelong,Shu
EPI_ISL_402243	Asia / China / Anhui	2019-11-12	B/Anhui-Jinan/11001/2019	WHO Chinese National Influenza Center	WHO Chinese National Influenza Center	Xiaoxu,Zeng;Xiyan,Li;Weijuan,Huang;Lei,Yang;Dayan,Wang;Yuelong,Shu
EPI_ISL_402244	Asia / China / Guangxi	2019-10-22	B/Guangxi-Xixiangtang/1901/2019	WHO Chinese National Influenza Center	WHO Chinese National Influenza Center	Xiaoxu,Zeng;Xiyan,Li;Weijuan,Huang;Lei,Yang;Dayan,Wang;Yuelong,Shu
EPI_ISL_402245	Asia / China / Guangxi	2019-11-05	B/Guangxi-Jinchengjiang/13428/2019	WHO Chinese National Influenza Center	WHO Chinese National Influenza Center	Xiaoxu,Zeng;Xiyan,Li;Weijuan,Huang;Lei,Yang;Dayan,Wang;Yuelong,Shu
EPI_ISL_402246	Asia / China / Chongqing	2019-11-18	B/Chongqing-Yuzhong/11842/2019	WHO Chinese National Influenza Center	WHO Chinese National Influenza Center	Xiaoxu,Zeng;Xiyan,Li;Weijuan,Huang;Lei,Yang;Dayan,Wang;Yuelong,Shu
EPI_ISL_402247	Asia / China / Tianjin	2019-11-05	B/Tianjin-Hedong/1507/2019	WHO Chinese National Influenza Center	WHO Chinese National Influenza Center	Xiaoxu,Zeng;Xiyan,Li;Weijuan,Huang;Lei,Yang;Dayan,Wang;Yuelong,Shu
EPI_ISL_402248	Asia / China / Shanghai	2019-11-04	B/Shanghai-Songjiang/1895/2019	WHO Chinese National Influenza Center	WHO Chinese National Influenza Center	Xiaoxu,Zeng;Xiyan,Li;Weijuan,Huang;Lei,Yang;Dayan,Wang;Yuelong,Shu
EPI_ISL_402249	Asia / China / Guizhou	2019-11-27	B/Guizhou-Xinyi/1956/2019	WHO Chinese National Influenza Center	WHO Chinese National Influenza Center	Xiaoxu,Zeng;Xiyan,Li;Weijuan,Huang;Lei,Yang;Dayan,Wang;Yuelong,Shu
EPI_ISL_402250	Asia / China / Hunan	2019-12-03	B/Hunan-Suxian/11134/2019	WHO Chinese National Influenza Center	WHO Chinese National Influenza Center	Xiaoxu,Zeng;Xiyan,Li;Weijuan,Huang;Lei,Yang;Dayan,Wang;Yuelong,Shu
EPI_ISL_402251	Asia / China	2019-12-05	B/Shanghai-Huangpu/1935/2019	WHO Chinese National Influenza Center	WHO Chinese National Influenza Center	Xiaoxu,Zeng;Xiyan,Li;Weijuan,Huang;Lei,Yang;Dayan,Wang;Yuelong,Shu
EPI_ISL_402252	Asia / China	2019-12-05	B/Shanghai-Huangpu/1935/2019	WHO Chinese National Influenza Center	WHO Chinese National Influenza Center	Xiaoxu,Zeng;Xiyan,Li;Weijuan,Huang;Lei,Yang;Dayan,Wang;Yuelong,Shu
EPI_ISL_402253	Asia / China	2019-12-03	B/Shanghai-Baoshan/345/2019	WHO Chinese National Influenza Center	WHO Chinese National Influenza Center	Xiaoxu,Zeng;Xiyan,Li;Weijuan,Huang;Lei,Yang;Dayan,Wang;Yuelong,Shu
EPI_ISL_402254	Asia / China / Chongqing	2019-12-02	B/Chongqing-Yuzhong/11958/2019	WHO Chinese National Influenza Center	WHO Chinese National Influenza Center	Xiaoxu,Zeng;Xiyan,Li;Weijuan,Huang;Lei,Yang;Dayan,Wang;Yuelong,Shu
EPI_ISL_402255	Asia / China / Zhejiang	2019-11-26	B/Zhejiang-Haishu/12027/2019	WHO Chinese National Influenza Center	WHO Chinese National Influenza Center	Xiaoxu,Zeng;Xiyan,Li;Weijuan,Huang;Lei,Yang;Dayan,Wang;Yuelong,Shu
EPI_ISL_402284	Asia / China / Hunan	2019-10-16	B/Hunan-Yuhu/1838/2019	WHO Chinese National Influenza Center	WHO Chinese National Influenza Center	Xiaoxu,Zeng;Xiyan,Li;Weijuan,Huang;Lei,Yang;Dayan,Wang;Yuelong,Shu
EPI_ISL_402285	Asia / China / Zhejiang	2019-10-16	B/Zhejiang-Yuecheng/11151/2019	WHO Chinese National Influenza Center	WHO Chinese National Influenza Center	Xiaoxu,Zeng;Xiyan,Li;Weijuan,Huang;Lei,Yang;Dayan,Wang;Yuelong,Shu
EPI_ISL_402286	Asia / China / Zhejiang	2019-10-29	B/Zhejiang-Yongkang/1872/2019	WHO Chinese National Influenza Center	WHO Chinese National Influenza Center	Xiaoxu,Zeng;Xiyan,Li;Weijuan,Huang;Lei,Yang;Dayan,Wang;Yuelong,Shu
EPI_ISL_402287	Asia / China / Fujian	2019-10-14	B/Fujian-Cangshan/1876/2019	WHO Chinese National Influenza Center	WHO Chinese National Influenza Center	Xiaoxu,Zeng;Xiyan,Li;Weijuan,Huang;Lei,Yang;Dayan,Wang;Yuelong,Shu
EPI_ISL_402288	Asia / China / Anhui	2019-10-22	B/Anhui-Baohe/3117/2019	WHO Chinese National Influenza Center	WHO Chinese National Influenza Center	Xiaoxu,Zeng;Xiyan,Li;Weijuan,Huang;Lei,Yang;Dayan,Wang;Yuelong,Shu
EPI_ISL_402289	Asia / China	2019-11-03	B/Shanghai-Jingan/11943/2019	WHO Chinese National Influenza Center	WHO Chinese National Influenza Center	Xiaoxu,Zeng;Xiyan,Li;Weijuan,Huang;Lei,Yang;Dayan,Wang;Yuelong,Shu
EPI_ISL_402290	Asia / China / Zhejiang	2019-10-29	B/Zhejiang-Haishu/11866/2019	WHO Chinese National Influenza Center	WHO Chinese National Influenza Center	Xiaoxu,Zeng;Xiyan,Li;Weijuan,Huang;Lei,Yang;Dayan,Wang;Yuelong,Shu
EPI_ISL_402312	Asia / China	2019-10-09	B/Shanghai-Jingan/11800/2019	WHO Chinese National Influenza Center	WHO Chinese National Influenza Center	Xiaoxu,Zeng;Xiyan,Li;Weijuan,Huang;Lei,Yang;Dayan,Wang;Yuelong,Shu
EPI_ISL_402314	Asia / China / Guangxi	2019-07-23	B/Guangxi-Xinbin/1668/2019	WHO Chinese National Influenza Center	WHO Chinese National Influenza Center	Xiaoxu,Zeng;Xiyan,Li;Weijuan,Huang;Lei,Yang;Dayan,Wang;Yuelong,Shu
EPI_ISL_402315	Asia / China / Shanghai	2019-10-17	B/Shanghai-Hongkou/514/2019	WHO Chinese National Influenza Center	WHO Chinese National Influenza Center	Xiaoxu,Zeng;Xiyan,Li;Weijuan,Huang;Lei,Yang;Dayan,Wang;Yuelong,Shu
EPI_ISL_402316	Asia / China / Sichuan	2019-10-07	B/Sichuan-Qingyang/11651/2019	WHO Chinese National Influenza Center	WHO Chinese National Influenza Center	Xiaoxu,Zeng;Xiyan,Li;Weijuan,Huang;Lei,Yang;Dayan,Wang;Yuelong,Shu
EPI_ISL_402317	Asia / China / Hunan	2019-10-11	B/Hunan-Heshan/1844/2019	WHO Chinese National Influenza Center	WHO Chinese National Influenza Center	Xiaoxu,Zeng;Xiyan,Li;Weijuan,Huang;Lei,Yang;Dayan,Wang;Yuelong,Shu
EPI_ISL_402318	Asia / China / Zhejiang	2019-10-07	B/Zhejiang-Dinghai/1804/2019	WHO Chinese National Influenza Center	WHO Chinese National Influenza Center	Xiaoxu,Zeng;Xiyan,Li;Weijuan,Huang;Lei,Yang;Dayan,Wang;Yuelong,Shu
EPI_ISL_402319	Asia / China / Chongqing	2019-10-21	B/Chongqing-Yuzhong/11689/2019	WHO Chinese National Influenza Center	WHO Chinese National Influenza Center	Xiaoxu,Zeng;Xiyan,Li;Weijuan,Huang;Lei,Yang;Dayan,Wang;Yuelong,Shu
EPI_ISL_402320	Asia / China / Jiangxi	2019-10-08	B/Jiangxi-Yuehu/1859/2019	WHO Chinese National Influenza Center	WHO Chinese National Influenza Center	Xiaoxu,Zeng;Xiyan,Li;Weijuan,Huang;Lei,Yang;Dayan,Wang;Yuelong,Shu
EPI_ISL_402321	Asia / China / Guangxi	2019-10-10	B/Guangxi-Youjiang/1868/2019	WHO Chinese National Influenza Center	WHO Chinese National Influenza Center	Xiaoxu,Zeng;Xiyan,Li;Weijuan,Huang;Lei,Yang;Dayan,Wang;Yuelong,Shu
EPI_ISL_402322	Asia / China	2019-09-02	B/Shanghai-Huangpu/1675/2019	WHO Chinese National Influenza Center	WHO Chinese National Influenza Center	Xiaoxu,Zeng;Xiyan,Li;Weijuan,Huang;Lei,Yang;Dayan,Wang;Yuelong,Shu
EPI_ISL_402323	Asia / China / Fujian	2019-09-09	B/Fujian-Tongan/1707/2019	WHO Chinese National Influenza Center	WHO Chinese National Influenza Center	Xiaoxu,Zeng;Xiyan,Li;Weijuan,Huang;Lei,Yang;Dayan,Wang;Yuelong,Shu
EPI_ISL_402324	Asia / China / Zhejiang	2019-09-10	B/Zhejiang-Haishu/11591/2019	WHO Chinese National Influenza Center	WHO Chinese National Influenza Center	Xiaoxu,Zeng;Xiyan,Li;Weijuan,Huang;Lei,Yang;Dayan,Wang;Yuelong,Shu
EPI_ISL_402337	Asia / China / Hainan	2019-05-16	B/Hainan-Lingao/322/2019	WHO Chinese National Influenza Center	WHO Chinese National Influenza Center	Xiaoxu,Zeng;Xiyan,Li;Weijuan,Huang;Lei,Yang;Dayan,Wang;Yuelong,Shu
EPI_ISL_402338	Asia / China / Hainan	2019-05-05	B/Hainan-Meilan/1373/2019	WHO Chinese National Influenza Center	WHO Chinese National Influenza Center	Xiaoxu,Zeng;Xiyan,Li;Weijuan,Huang;Lei,Yang;Dayan,Wang;Yuelong,Shu
EPI_ISL_402339	Asia / China / Anhui	2019-06-04	B/Anhui-Xiangshan/1526/2019	WHO Chinese National Influenza Center	WHO Chinese National Influenza Center	Xiaoxu,Zeng;Xiyan,Li;Weijuan,Huang;Lei,Yang;Dayan,Wang;Yuelong,Shu
EPI_ISL_402340	Asia / China / Zhejiang	2019-07-11	B/Zhejiang-Shangcheng/1582/2019	WHO Chinese National Influenza Center	WHO Chinese National Influenza Center	Xiaoxu,Zeng;Xiyan,Li;Weijuan,Huang;Lei,Yang;Dayan,Wang;Yuelong,Shu
EPI_ISL_402341	Asia / China / Guangxi	2019-07-03	B/Guangxi-Xiangshan/11134/2019	WHO Chinese National Influenza Center	WHO Chinese National Influenza Center	Xiaoxu,Zeng;Xiyan,Li;Weijuan,Huang;Lei,Yang;Dayan,Wang;Yuelong,Shu
EPI_ISL_402342	Asia / China	2019-07-23	B/Hunan-Lengshuitan/11196/2019	WHO Chinese National Influenza Center	WHO Chinese National Influenza Center	Xiaoxu,Zeng;Xiyan,Li;Weijuan,Huang;Lei,Yang;Dayan,Wang;Yuelong,Shu
EPI_ISL_402343	Asia / China / Jiangxi	2019-08-05	B/Jiangxi-Yuanzhou/11244/2019	WHO Chinese National Influenza Center	WHO Chinese National Influenza Center	Xiaoxu,Zeng;Xiyan,Li;Weijuan,Huang;Lei,Yang;Dayan,Wang;Yuelong,Shu
EPI_ISL_402344	Asia / China / Yunnan	2019-09-01	B/Yunnan-Linxiang/1748/2019	WHO Chinese National Influenza Center	WHO Chinese National Influenza Center	Xiaoxu,Zeng;Xiyan,Li;Weijuan,Huang;Lei,Yang;Dayan,Wang;Yuelong,Shu
EPI_ISL_402345	Asia / China / Guangxi	2019-09-02	B/Guangxi-Jinchengjiang/13218/2019	WHO Chinese National Influenza Center	WHO Chinese National Influenza Center	Xiaoxu,Zeng;Xiyan,Li;Weijuan,Huang;Lei,Yang;Dayan,Wang;Yuelong,Shu
EPI_ISL_402346	Asia / China	2019-09-02	B/Shanghai-Baoshan/1685/2019	WHO Chinese National Influenza Center	WHO Chinese National Influenza Center	Xiaoxu,Zeng;Xiyan,Li;Weijuan,Huang;Lei,Yang;Dayan,Wang;Yuelong,Shu
EPI_ISL_402347	Asia / China / Shanghai	2019-09-04	B/Shanghai-Pudongxin/11420/2019	WHO Chinese National Influenza Center	WHO Chinese National Influenza Center	Xiaoxu,Zeng;Xiyan,Li;Weijuan,Huang;Lei,Yang;Dayan,Wang;Yuelong,Shu
EPI_ISL_402603	South America / Argentina	2019-11-15	B/Argentina/2880/2019	Instituto Nacional de Enfermedades Infecciosas	Centers for Disease Control and Prevention	NA
EPI_ISL_402609	South America / Argentina	2019-11-08	B/Argentina/2858/2019	Instituto Nacional de Enfermedades Infecciosas	Centers for Disease Control and Prevention	NA
EPI_ISL_402614	South America / Argentina	2019-11-11	B/Argentina/2802/2019	Instituto Nacional de Enfermedades Infecciosas	Centers for Disease Control and Prevention	NA
EPI_ISL_402618	North America / United States / Alabama	2019-11-27	B/Alabama/11/2019	ADPH Bureau of Clinical Laboratories	Centers for Disease Control and Prevention	NA
EPI_ISL_402635	North America / United States / Illinois	2019-12-02	B/Illinois/11/2019	Illinois Department of Public Health-Carbondale	Centers for Disease Control and Prevention	NA
EPI_ISL_402642	Asia / Philippines	2019-09-06	B/Philippines/1136/2019	Research Institute for Tropical Medicine, Virology Department	Centers for Disease Control and Prevention	NA
EPI_ISL_402644	Asia / Philippines	2019-10-28	B/Philippines/1472/2019	Research Institute for Tropical Medicine, Virology Department	Centers for Disease Control and Prevention	NA
EPI_ISL_402647	Asia / Philippines	2019-10-27	B/Philippines/1103/2019	Research Institute for Tropical Medicine, Virology Department	Centers for Disease Control and Prevention	NA
EPI_ISL_402649	North America / United States / Alaska	2019-12-09	B/Alaska/16/2019	Alaska State Virology Lab	Centers for Disease Control and Prevention	NA
EPI_ISL_402668	Asia / Bangladesh	2019-09-05	B/Bangladesh/1190903008/2019	icddr,b International Centre for Diarrhoeal Disease Research, Bangladesh	Centers for Disease Control and Prevention	NA
EPI_ISL_402680	Asia / Bangladesh	2019-10-03	B/Bangladesh/3191003002/2019	icddr,b International Centre for Diarrhoeal Disease Research, Bangladesh	Centers for Disease Control and Prevention	NA
EPI_ISL_402707	South America / Chile	2019-10-21	B/Chile/5752/2019	Instituto de Salud Publica de Chile	Centers for Disease Control and Prevention	NA
EPI_ISL_402887	North America / United States / Alabama	2019-11-27	B/Alabama/11/2019	ADPH Bureau of Clinical Laboratories	Centers for Disease Control and Prevention	NA
EPI_ISL_402889	North America / United States / Illinois	2019-12-02	B/Illinois/11/2019	Illinois Department of Public Health-Carbondale	Centers for Disease Control and Prevention	NA
EPI_ISL_402968	South America / Brazil	2019-09-30	B/Ribeirao Preto/19246327-IAL/2019	Instituto Adolfo Lutz	Centers for Disease Control and Prevention	NA
EPI_ISL_402974	South America / Brazil	2019-10-07	B/Guarulhos/1353090-IAL/2019	Instituto Adolfo Lutz	Centers for Disease Control and Prevention	NA
EPI_ISL_402989	Europe / France	2019-08-06	B/LaReunion/2124/2019	CNR Virus des Infections Respiratoires - France SUD	CNR Virus des Infections Respiratoires - France SUD	NA
EPI_ISL_402990	Europe / France	2019-08-23	B/LaReunion/2151/2019	CNR Virus des Infections Respiratoires - France SUD	CNR Virus des Infections Respiratoires - France SUD	NA
EPI_ISL_403038	North America / United States / Maryland	2019-11-06	B/Maryland/24/2019	Maryland Department of Health and Mental Hygiene	Centers for Disease Control and Prevention	NA
EPI_ISL_403045	North America / United States / New York	2019-12-10	B/New York/16/2019	New York State Department of Health	Centers for Disease Control and Prevention	NA
EPI_ISL_403119	Europe / Italy	2019-10-04	B/Italy/9913/2019	U.S. Air Force School of Aerospace Medicine	U.S. Air Force School of Aerospace Medicine	Gruner, W.E.; Fries, A.C.; Garrett, C.M.; Powell, M.L.; Hanson, J.F.; DeMarcus, L.S.; Sjoberg, P.A.; Bogue, A.L.; Robbins, A.S.; Macias, E.A.; Lambert, A.W.; Dane, D.J.
EPI_ISL_403165	Asia / Korea, Republic of	2019-10-04	B/South Korea/9959/2019	U.S. Air Force School of Aerospace Medicine	U.S. Air Force School of Aerospace Medicine	Gruner, W.E.; Fries, A.C.; Garrett, C.M.; Powell, M.L.; Hanson, J.F.; DeMarcus, L.S.; Sjoberg, P.A.; Bogue, A.L.; Robbins, A.S.; Macias, E.A.; Lambert, A.W.; Dane, D.J.
EPI_ISL_403169	Asia / Korea, Republic of	2019-09-16	B/South Korea/9963/2019	U.S. Air Force School of Aerospace Medicine	U.S. Air Force School of Aerospace Medicine	Gruner, W.E.; Fries, A.C.; Garrett, C.M.; Powell, M.L.; Hanson, J.F.; DeMarcus, L.S.; Sjoberg, P.A.; Bogue, A.L.; Robbins, A.S.; Macias, E.A.; Lambert, A.W.; Dane, D.J.
EPI_ISL_403170	Asia / Korea, Republic of	2019-09-16	B/South Korea/9964/2019	U.S. Air Force School of Aerospace Medicine	U.S. Air Force School of Aerospace Medicine	Gruner, W.E.; Fries, A.C.; Garrett, C.M.; Powell, M.L.; Hanson, J.F.; DeMarcus, L.S.; Sjoberg, P.A.; Bogue, A.L.; Robbins, A.S.; Macias, E.A.; Lambert, A.W.; Dane, D.J.
EPI_ISL_403172	Asia / Korea, Republic of	2019-09-24	B/South Korea/9966/2019	U.S. Air Force School of Aerospace Medicine	U.S. Air Force School of Aerospace Medicine	Gruner, W.E.; Fries, A.C.; Garrett, C.M.; Powell, M.L.; Hanson, J.F.; DeMarcus, L.S.; Sjoberg, P.A.; Bogue, A.L.; Robbins, A.S.; Macias, E.A.; Lambert, A.W.; Dane, D.J.
EPI_ISL_403173	Asia / Korea, Republic of	2019-10-10	B/South Korea/9967/2019	U.S. Air Force School of Aerospace Medicine	U.S. Air Force School of Aerospace Medicine	Gruner, W.E.; Fries, A.C.; Garrett, C.M.; Powell, M.L.; Hanson, J.F.; DeMarcus, L.S.; Sjoberg, P.A.; Bogue, A.L.; Robbins, A.S.; Macias, E.A.; Lambert, A.W.; Dane, D.J.
EPI_ISL_403177	Asia / Korea, Republic of	2019-10-04	B/South Korea/9971/2019	U.S. Air Force School of Aerospace Medicine	U.S. Air Force School of Aerospace Medicine	Gruner, W.E.; Fries, A.C.; Garrett, C.M.; Powell, M.L.; Hanson, J.F.; DeMarcus, L.S.; Sjoberg, P.A.; Bogue, A.L.; Robbins, A.S.; Macias, E.A.; Lambert, A.W.; Dane, D.J.
EPI_ISL_403178	Asia / Korea, Republic of	2019-10-07	B/South Korea/9972/2019	U.S. Air Force School of Aerospace Medicine	U.S. Air Force School of Aerospace Medicine	Gruner, W.E.; Fries, A.C.; Garrett, C.M.; Powell, M.L.; Hanson, J.F.; DeMarcus, L.S.; Sjoberg, P.A.; Bogue, A.L.; Robbins, A.S.; Macias, E.A.; Lambert, A.W.; Dane, D.J.
EPI_ISL_403179	Asia / Korea, Republic of	2019-10-15	B/South Korea/9974/2019	U.S. Air Force School of Aerospace Medicine	U.S. Air Force School of Aerospace Medicine	Gruner, W.E.; Fries, A.C.; Garrett, C.M.; Powell, M.L.; Hanson, J.F.; DeMarcus, L.S.; Sjoberg, P.A.; Bogue, A.L.; Robbins, A.S.; Macias, E.A.; Lambert, A.W.; Dane, D.J.
EPI_ISL_403261	Europe / Russian Federation / Moscow	2019-12-06	B/Moscow/RII-499S/2019	NIC Russia, Ivanovsky Research Institute of Virology	WHO National Influenza Centre Russian Federation	NA
EPI_ISL_403358	Europe / Ireland	2019-11-12	B/Ireland/90048/2019	UCD National Virus Reference Laboratory	Crick Worldwide Influenza Centre	NA
EPI_ISL_403374	Europe / Norway	2019-10-29	B/Norway/2386/2019	WHO National Influenza Centre	Crick Worldwide Influenza Centre	NA
EPI_ISL_403375	Europe / Norway	2019-11-07	B/Norway/2426/2019	WHO National Influenza Centre	Crick Worldwide Influenza Centre	NA
EPI_ISL_403478	South America / Chile / Concepcion	2019-07-10	B/Concepcion/65396/2019	Instituto de Salud Publica de Chile	Instituto de Salud Publica de Chile	Tognarelli, J.; Lagos, J.; Arata, L.; Fasce, R.; Fernandez, J.
EPI_ISL_403479	South America / Chile / Region Metropolitana de Santiago	2019-06-17	B/Santiago/57035/2019	Instituto de Salud Publica de Chile	Instituto de Salud Publica de Chile	Tognarelli, J.; Lagos, J.; Arata, L.; Fasce, R.; Fernandez, J.
EPI_ISL_403480	South America / Chile / Region Metropolitana de Santiago	2019-06-22	B/Santiago/58113/2019	Instituto de Salud Publica de Chile	Instituto de Salud Publica de Chile	Tognarelli, J.; Lagos, J.; Arata, L.; Fasce, R.; Fernandez, J.
EPI_ISL_403481	South America / Chile / Region Metropolitana de Santiago	2019-06-18	B/Santiago/59293/2019	Instituto de Salud Publica de Chile	Instituto de Salud Publica de Chile	Tognarelli, J.; Lagos, J.; Arata, L.; Fasce, R.; Fernandez, J.
EPI_ISL_403482	South America / Chile / Vina_Del_Mar	2019-06-16	B/Vina_Del_Mar/67129/2019	Instituto de Salud Publica de Chile	Instituto de Salud Publica de Chile	Tognarelli, J.; Lagos, J.; Arata, L.; Fasce, R.; Fernandez, J.
EPI_ISL_403484	South America / Chile / Puerto_Montt	2019-09-11	B/Puerto_Montt/85843/2019	Instituto de Salud Publica de Chile	Instituto de Salud Publica de Chile	Tognarelli, J.; Lagos, J.; Arata, L.; Fasce, R.; Fernandez, J.
EPI_ISL_403485	South America / Chile / Region Metropolitana de Santiago	2019-09-30	B/Santiago/86704/2019	Instituto de Salud Publica de Chile	Instituto de Salud Publica de Chile	Tognarelli, J.; Lagos, J.; Arata, L.; Fasce, R.; Fernandez, J.
EPI_ISL_403489	South America / Chile / Punta_Arenas	2019-09-27	B/Punta_Arenas/87740/2019	Instituto de Salud Publica de Chile	Instituto de Salud Publica de Chile	Tognarelli, J.; Lagos, J.; Arata, L.; Fasce, R.; Fernandez, J.
EPI_ISL_403504	South America / Chile / Arica	2019-08-09	B/Arica/82855/2019	Instituto de Salud Publica de Chile	Instituto de Salud Publica de Chile	Tognarelli, J.; Lagos, J.; Arata, L.; Fasce, R.; Fernandez, J.
EPI_ISL_4036585	Asia / China / Sichuan-Jingyang	2019-11-26	B/Sichuan-Jingyang/12048/2019	WHO Chinese National Influenza Center	WHO Collaborating Centre for Reference and Research on Influenza	Deng,Y-M; Iannello,P; Lau,H; Spirason,N; Moselen,J; Aziz,A; Komadina,N.
EPI_ISL_403741	Europe / Russian Federation / Pskov Oblast	2019-09-18	B/Pskov/1V/2019	Center of Hygiene and Epidemiology in Pskov Region	State Research Center of Virology and Biotechnology (VECTOR)	Alexey,Danilenko; Ivan,Susloparov; Natalya,Kolosova; Natalya,Goncharova; Juliya,Bulanovich; Polina,Torzhkova; Alexander,Durymanov; Svetlana,Svyatchenko; Tatyana,Ilyicheva; Alexander,Ryzhikov
EPI_ISL_403950	Europe / Romania / Bucharest	2019-12-13	B/Romania/6/2019	National Institute for Infectious Diseases ‚ÄúProf. Dr. Matei Bal»ô‚Äù	National Institute of Infectious Diseases-Prof. Dr. Matei Bals	'Banica, Leontina; Surleac, Marius; Paraschiv, Simona'
EPI_ISL_404004	Europe / Russian Federation / Primorsky Krai?	2019-11-26	B/Vladivostok/5/2019	Center of Hygiene and Epidemiology in Primorie Territory	WHO National Influenza Centre Russian Federation	NA
EPI_ISL_404005	Europe / Russian Federation / Primorsky Krai?	2019-11-27	B/Vladivostok/6/2019	Center of Hygiene and Epidemiology in Primorie Territory	WHO National Influenza Centre Russian Federation	NA
EPI_ISL_404084	Oceania / Australia / Victoria / Overseas	2019-10-08	B/Victoria/2103/2019	Alfred Hospital	WHO Collaborating Centre for Reference and Research on Influenza	Deng,Y-M; Iannello,P; Lau,H; Todd,A; Spirason,N; Moselen,J; Komadina,N.
EPI_ISL_404089	Oceania / Australia / Victoria / Port Melbourne	2019-09-07	B/Victoria/2087/2019	Alfred Hospital	WHO Collaborating Centre for Reference and Research on Influenza	Deng,Y-M; Iannello,P; Lau,H; Todd,A; Spirason,N; Moselen,J; Komadina,N.
EPI_ISL_404090	Oceania / Australia / Victoria / Parkdale	2019-10-10	B/Victoria/2100/2019	Alfred Hospital	WHO Collaborating Centre for Reference and Research on Influenza	Deng,Y-M; Iannello,P; Lau,H; Todd,A; Spirason,N; Moselen,J; Komadina,N.
EPI_ISL_404093	Asia / Malaysia	2019-06-11	B/Malaysia/RP2124/2019	Institut Penyelidikan Perubatan	WHO Collaborating Centre for Reference and Research on Influenza	Deng,Y-M; Iannello,P; Lau,H; Todd,A; Spirason,N; Moselen,J; Komadina,N.
EPI_ISL_404095	Asia / Malaysia	2019-06-19	B/Malaysia/RP2132/2019	Institut Penyelidikan Perubatan	WHO Collaborating Centre for Reference and Research on Influenza	Deng,Y-M; Iannello,P; Lau,H; Todd,A; Spirason,N; Moselen,J; Komadina,N.
EPI_ISL_404096	Asia / Malaysia	2019-06-26	B/Malaysia/RP2133/2019	Institut Penyelidikan Perubatan	WHO Collaborating Centre for Reference and Research on Influenza	Deng,Y-M; Iannello,P; Lau,H; Todd,A; Spirason,N; Moselen,J; Komadina,N.
EPI_ISL_404097	Asia / Malaysia	2019-06-26	B/Malaysia/RP2134/2019	Institut Penyelidikan Perubatan	WHO Collaborating Centre for Reference and Research on Influenza	Deng,Y-M; Iannello,P; Lau,H; Todd,A; Spirason,N; Moselen,J; Komadina,N.
EPI_ISL_404101	Oceania / Australia / Victoria / Overseas	2019-10-24	B/Victoria/2091/2019	Alfred Hospital	WHO Collaborating Centre for Reference and Research on Influenza	Deng,Y-M; Iannello,P; Lau,H; Todd,A; Spirason,N; Moselen,J; Komadina,N.
EPI_ISL_404104	Oceania / Australia / Western Australia / Bicton	2019-08-10	B/Perth/48/2019	Pathwest QE II Medical Centre	WHO Collaborating Centre for Reference and Research on Influenza	Deng,Y-M; Iannello,P; Lau,H; Todd,A; Spirason,N; Moselen,J; Komadina,N.
EPI_ISL_404108	Oceania / Australia / Queensland / Eton	2019-10-20	B/Townsville/12/2019	Queensland Health Forensic and Scientific Services	WHO Collaborating Centre for Reference and Research on Influenza	Deng,Y-M; Iannello,P; Lau,H; Todd,A; Spirason,N; Moselen,J; Komadina,N.
EPI_ISL_404110	Oceania / Australia / Queensland / Proserpine	2019-11-03	B/Townsville/13/2019	Queensland Health Forensic and Scientific Services	WHO Collaborating Centre for Reference and Research on Influenza	Deng,Y-M; Iannello,P; Lau,H; Todd,A; Spirason,N; Moselen,J; Komadina,N.
EPI_ISL_404397	Asia / Korea, Republic of	2019-12-03	B/South Korea/10250/2019	U.S. Air Force School of Aerospace Medicine	U.S. Air Force School of Aerospace Medicine	Gruner, W.E.; Fries, A.C.; Garrett, C.M.; Powell, M.L.; Hanson, J.F.; DeMarcus, L.S.; Sjoberg, P.A.; Bogue, A.L.; Robbins, A.S.; Macias, E.A.; Lambert, A.W.; Dane, D.J.
EPI_ISL_404639	Asia / United Arab Emirates	2019-11-26	B/Abu Dhabi/110/2019	Shaikh Khalifa Medical City	Centers for Disease Control and Prevention	NA
EPI_ISL_404686	Asia / India	2019-11-16	B/India/4674/2019	National Institute of Virology	Centers for Disease Control and Prevention	NA
EPI_ISL_404687	Asia / India	2019-11-16	B/India/4673/2019	National Institute of Virology	Centers for Disease Control and Prevention	NA
EPI_ISL_404693	North America / United States / Alaska	2019-12-09	B/Alaska/16/2019	Alaska State Virology Lab	Centers for Disease Control and Prevention	NA
EPI_ISL_404858	North America / Mexico	2019-09-23	B/Mexico/2698/2019	Laboratorio de Virus Respiratorio	Centers for Disease Control and Prevention	NA
EPI_ISL_404893	North America / United States / Alaska	2019-12-30	B/Alaska/19/2019	Alaska State Virology Lab	Centers for Disease Control and Prevention	NA
EPI_ISL_404894	North America / United States / Washington	2019-12-16	B/Washington/28/2019	Washington State Public Health Laboratory	Centers for Disease Control and Prevention	NA
EPI_ISL_404896	North America / United States / Texas	2019-12-14	B/Texas/52/2019	San Antonio Metropolitan Health	Centers for Disease Control and Prevention	NA
EPI_ISL_404931	Asia / India	2019-11-11	B/India/4671/2019	National Institute of Virology	Centers for Disease Control and Prevention	NA
EPI_ISL_404932	Asia / India	2019-09-17	B/India/4728/2019	National Institute of Virology	Centers for Disease Control and Prevention	NA
EPI_ISL_404933	Asia / India	2019-09-16	B/India/3764/2019	National Institute of Virology	Centers for Disease Control and Prevention	NA
EPI_ISL_404935	Asia / India	2019-10-22	B/India/3991/2019	National Institute of Virology	Centers for Disease Control and Prevention	NA
EPI_ISL_404936	Asia / India	2019-08-12	B/India/2244/2019	National Institute of Virology	Centers for Disease Control and Prevention	NA
EPI_ISL_404944	South America / Chile	2019-11-13	B/Chile/8427/2019	Instituto de Salud Publica de Chile	Centers for Disease Control and Prevention	NA
EPI_ISL_405379	Asia / Korea, Republic of	2019-10-07	B/Gyeongnam/1245/2019	National Institute of Health	National Institute of Infectious Diseases (NIID)	Kuwahara,Tomoko;Takashita,Emi;Fujisaki,Seiichiro;Shirakura,Masayuki;Watanabe,Shinji;Hasegawa,Hideki
EPI_ISL_405800	North America / United States / New York	2019-12-10	B/New York/16/2019	New York State Department of Health	Centers for Disease Control and Prevention	NA
EPI_ISL_405810	North America / United States / Maryland	2019-11-06	B/Maryland/24/2019	Maryland Department of Health and Mental Hygiene	Centers for Disease Control and Prevention	NA
EPI_ISL_4059339	Asia / China	2019-11-26	B/Sichuan-Jingyang/12048/2019	WHO Chinese National Influenza Center	Centers for Disease Control and Prevention	NA
EPI_ISL_406053	Africa / Morocco	2019-11-07	B/Fes/94/2019	Institut National d'Hygi&egrave;ne	Crick Worldwide Influenza Centre	NA
EPI_ISL_406059	Africa / Ghana	2019-10-31	B/Ghana/684/2019	University of Ghana	Crick Worldwide Influenza Centre	NA
EPI_ISL_406062	Asia / Hong Kong (SAR)	2019-11-10	B/Hong Kong/991/2019	Government Virus Unit	Crick Worldwide Influenza Centre	NA
EPI_ISL_406073	Europe / Latvia	2019-11-13	B/Latvia/11-031992/2019	State Agency, Infectology Center of Latvia	Crick Worldwide Influenza Centre	NA
EPI_ISL_406084	Africa / Morocco	2019-11-15	B/Meknes/124/2019	Institut National d'Hygi&egrave;ne	Crick Worldwide Influenza Centre	NA
EPI_ISL_406086	Africa / Morocco	2019-11-20	B/Meknes/127/2019	Institut National d'Hygi&egrave;ne	Crick Worldwide Influenza Centre	NA
EPI_ISL_406090	Asia / Qatar	2019-10-20	B/Qatar/13-VI-19-0063573/2019	Supreme Health Council	Crick Worldwide Influenza Centre	NA
EPI_ISL_406092	Asia / Qatar	2019-09-29	B/Qatar/24-VI-19-0057088/2019	Supreme Health Council	Crick Worldwide Influenza Centre	NA
EPI_ISL_406093	Asia / Qatar	2019-10-17	B/Qatar/47-VI-19-0062540/2019	Supreme Health Council	Crick Worldwide Influenza Centre	NA
EPI_ISL_406098	Africa / Morocco	2019-12-04	B/Rabat/228/2019	Institut National d'Hygi&egrave;ne	Crick Worldwide Influenza Centre	NA
EPI_ISL_406100	Europe / United Kingdom	2019-10-17	B/Scotland/114/2019	Gart Naval General Hospital	Crick Worldwide Influenza Centre	NA
EPI_ISL_406104	Africa / Morocco	2019-11-27	B/Tanger/184/2019	Institut National d'Hygi&egrave;ne	Crick Worldwide Influenza Centre	NA
EPI_ISL_406230	Europe / France	2019-10-04	B/Lyon/1861/2019	CNR Virus des Infections Respiratoires - France SUD	Crick Worldwide Influenza Centre	NA
EPI_ISL_406237	Europe / Finland	2019-08-14	B/Finland/124/2019	National Institute for Health and Welfare	Crick Worldwide Influenza Centre	NA
EPI_ISL_406254	Europe / Sweden	2019-08-01	B/Lulea/1/2019	Public Health Agency of Sweden	Crick Worldwide Influenza Centre	NA
EPI_ISL_406257	Europe / Sweden	2019-10-05	B/Stockholm/5/2019	Public Health Agency of Sweden	Crick Worldwide Influenza Centre	NA
EPI_ISL_406469	Europe / Romania / Municipiul Bucuresti	2019-12-16	B/Romania/255517/2019	Cantacuzino Institute	Cantacuzino Institute	Lazar,Mihaela
EPI_ISL_406472	Europe / Romania / Judetul Arges	2019-12-17	B/Romania/255624/2019	Cantacuzino Institute	Cantacuzino Institute	Lazar,Mihaela
EPI_ISL_406481	Europe / Romania / Judetul Arges	2019-12-24	B/Romania/255784/2019	Cantacuzino Institute	Cantacuzino Institute	Lazar,Mihaela
EPI_ISL_406488	Europe / Romania / Judetul Arges	2020-01-06	B/Romania/255886/2020	Cantacuzino Institute	Cantacuzino Institute	Lazar,Mihaela
EPI_ISL_406836	Oceania / New Zealand / Canterbury	2019-08-12	B/Canterbury/21/2019	Institute of Environmental Science and Research (ESR)	WHO Collaborating Centre for Reference and Research on Influenza	Deng,Y-M; Iannello,P; Lau,H; Todd,A; Spirason,N; Moselen,J; Komadina,N.
EPI_ISL_406837	Oceania / Australia	2019-11-07	B/Darwin/175/2019	Influenza Surveillance Centre for Disease Control	WHO Collaborating Centre for Reference and Research on Influenza	Deng,Y-M; Iannello,P; Lau,H; Todd,A; Spirason,N; Moselen,J; Komadina,N.
EPI_ISL_406839	Oceania / Australia / Adelaide	2019-10-19	B/South Australia/127/2019	Institute of Medical and Veterinary Science (IMVS)	WHO Collaborating Centre for Reference and Research on Influenza	Deng,Y-M; Iannello,P; Lau,H; Todd,A; Spirason,N; Moselen,J; Komadina,N.
EPI_ISL_406842	Oceania / New Zealand / Canterbury	2019-07-10	B/Canterbury/14/2019	Institute of Environmental Science and Research (ESR)	WHO Collaborating Centre for Reference and Research on Influenza	Deng,Y-M; Iannello,P; Lau,H; Todd,A; Spirason,N; Moselen,J; Komadina,N.
EPI_ISL_407156	Europe / Russian Federation / Sverdlovsk Oblast / Sverdlovsk Oblast	2019-12-24	B/Ekaterinburg/1/2019	FBUZ "Center of hygiene and epidemiology" in Sverdlovsk oblast	WHO National Influenza Centre Russian Federation	NA
EPI_ISL_407256	Oceania / Australia / Victoria / Thornbury	2019-04-01	B/Victoria/905/2019	Royal Chidrens Hospital	WHO Collaborating Centre for Reference and Research on Influenza	Deng,Y-M; Iannello,P; Lau,H; Todd,A; Spirason,N; Moselen,J; Komadina,N.
EPI_ISL_407287	Asia / Indonesia	2019	B/Indonesia/SMG0486/2019	Ministry of Health, NIHRD	WHO Collaborating Centre for Reference and Research on Influenza	Siswanto,S; Setiawaty,V; Deng, Y-M; Komadina,N.
EPI_ISL_407290	Asia / Indonesia	2019	B/Indonesia/BJM0956/2019	Ministry of Health, NIHRD	WHO Collaborating Centre for Reference and Research on Influenza	Siswanto,S; Setiawaty,V; Deng, Y-M; Komadina,N.
EPI_ISL_407529	Europe / France	2019-12-11	B/Alsace/2705/2019	Institut Pasteur	Crick Worldwide Influenza Centre	NA
EPI_ISL_407552	Africa / Ghana	2019-10-31	B/Ghana/699/2019	University of Ghana	Crick Worldwide Influenza Centre	NA
EPI_ISL_407558	Europe / Ukraine	2019-10-01	B/Kyiv/277/2019	Institute of Epidemiology and Infectious Diseases AMS of Ukraine	Crick Worldwide Influenza Centre	NA
EPI_ISL_407569	Europe / France	2019-12-16	B/Nord_Pas_de_Calais/2774/2019	Institut Pasteur	Crick Worldwide Influenza Centre	NA
EPI_ISL_407581	Africa / Morocco	2019-12-04	B/Rabat/228/2019	Institut National d'Hygi&egrave;ne	Crick Worldwide Influenza Centre	NA
EPI_ISL_408516	Asia / Thailand / Yasothon	2019-08-23	B/Yasothon/381/2019	WHO National Influenza Centre, National Institute of Medical Research (NIMR)	WHO Collaborating Centre for Reference and Research on Influenza	Deng,Y-M; Iannello,P; Lau,H; Todd,A; Spirason,N; Moselen,J; Komadina,N.
EPI_ISL_408519	Asia / Philippines / Province of Benguet / Baguio	2019-10-25	B/Philippines/31/2019	Research Institute of Tropical Medicine	WHO Collaborating Centre for Reference and Research on Influenza	Deng,Y-M; Iannello,P; Lau,H; Todd,A; Spirason,N; Moselen,J; Komadina,N.
EPI_ISL_408526	Asia / Thailand / Nakhonphanom	2019-09-09	B/Nakhonphanom/412/2019	WHO National Influenza Centre, National Institute of Medical Research (NIMR)	WHO Collaborating Centre for Reference and Research on Influenza	Deng,Y-M; Iannello,P; Lau,H; Todd,A; Spirason,N; Moselen,J; Komadina,N.
EPI_ISL_408543	Asia / Japan	2019-10-09	B/HIROSHIMA/17/2019	Center for Public Health and Environment, Hiroshima Prefectural Technology Research Institute	National Institute of Infectious Diseases (NIID)	Kuwahara,Tomoko;Takashita,Emi;Fujisaki,Seiichiro;Shirakura,Masayuki;Watanabe,Shinji;Hasegawa,Hideki
EPI_ISL_408544	Asia / Japan	2019-09-17	B/KOCHI/8/2019	Kochi Public Health and Sanitation Institute	National Institute of Infectious Diseases (NIID)	Kuwahara,Tomoko;Takashita,Emi;Fujisaki,Seiichiro;Shirakura,Masayuki;Watanabe,Shinji;Hasegawa,Hideki
EPI_ISL_408545	Asia / Japan	2019-11-28	B/SAPPORO/7/2019	Sapporo City Institute of Public Health	National Institute of Infectious Diseases (NIID)	Kuwahara,Tomoko;Takashita,Emi;Fujisaki,Seiichiro;Shirakura,Masayuki;Watanabe,Shinji;Hasegawa,Hideki
EPI_ISL_408556	Asia / Japan	2019-12-19	B/MIE/14/2019	Mie Prefecture Health and Environment Research Institute	National Institute of Infectious Diseases (NIID)	Kuwahara,Tomoko;Takashita,Emi;Fujisaki,Seiichiro;Shirakura,Masayuki;Watanabe,Shinji;Hasegawa,Hideki
EPI_ISL_408559	Asia / Japan	2019-12-05	B/NAGANO/2822/2019	Nagano Environmental Conservation Research Institute	National Institute of Infectious Diseases (NIID)	Kuwahara,Tomoko;Takashita,Emi;Fujisaki,Seiichiro;Shirakura,Masayuki;Watanabe,Shinji;Hasegawa,Hideki
EPI_ISL_409238	North America / United States / Georgia	2019-10-28	B/Georgia/19/2019	Georgia Public Health Laboratory	Centers for Disease Control and Prevention	NA
EPI_ISL_409262	Asia / Thailand	2019-08-28	B/Lopburi/394/2019	WHO National Influenza Centre, National Institute of Medical Research (NIMR)	Centers for Disease Control and Prevention	NA
EPI_ISL_409270	South America / Colombia	2019-12-12	B/Colombia/7372/2019	Instituto Nacional de Salud de Columbia	Centers for Disease Control and Prevention	NA
EPI_ISL_409271	South America / Colombia	2019-12-18	B/Colombia/7429/2019	Instituto Nacional de Salud de Columbia	Centers for Disease Control and Prevention	NA
EPI_ISL_409272	South America / Colombia	2019-12-20	B/Colombia/7431/2019	Instituto Nacional de Salud de Columbia	Centers for Disease Control and Prevention	NA
EPI_ISL_409325	North America / United States / Alaska	2019-12-30	B/Alaska/19/2019	Alaska State Virology Lab	Centers for Disease Control and Prevention	NA
EPI_ISL_409326	North America / United States / Washington	2019-12-16	B/Washington/28/2019	Washington State Public Health Laboratory	Centers for Disease Control and Prevention	NA
EPI_ISL_409520	South America / Colombia	2019-12-19	B/Colombia/7468/2019	Instituto Nacional de Salud de Columbia	Centers for Disease Control and Prevention	NA
EPI_ISL_409541	North America / United States / Texas	2019-12-14	B/Texas/52/2019	San Antonio Metropolitan Health	Centers for Disease Control and Prevention	NA
EPI_ISL_409542	Africa / Togo	2019-11-04	B/Togo/1647/2019	Institute National D'Hygiene	Centers for Disease Control and Prevention	NA
EPI_ISL_409579	Asia / Thailand	2019-11-22	B/Bangkok/476/2019	WHO National Influenza Centre, National Institute of Medical Research (NIMR)	Centers for Disease Control and Prevention	NA
EPI_ISL_409581	Asia / Thailand	2019-11-18	B/Ayutthaya/486/2019	WHO National Influenza Centre, National Institute of Medical Research (NIMR)	Centers for Disease Control and Prevention	NA
EPI_ISL_409582	Asia / Thailand	2019-09-18	B/Chiang Rai/481/2019	WHO National Influenza Centre, National Institute of Medical Research (NIMR)	Centers for Disease Control and Prevention	NA
EPI_ISL_409590	Asia / Thailand	2019-10-01	B/Nakhonphanom/429/2019	WHO National Influenza Centre, National Institute of Medical Research (NIMR)	Centers for Disease Control and Prevention	NA
EPI_ISL_409604	South America / Paraguay	2019-12-09	B/Paraguay/4892/2019	Central Laboratory of Public Health	Centers for Disease Control and Prevention	NA
EPI_ISL_409612	North America / United States / Texas	2019-12-24	B/Texas/152/2019	San Antonio Metropolitan Health	Centers for Disease Control and Prevention	NA
EPI_ISL_409613	South America / Paraguay	2019-11-25	B/Paraguay/1477/2019	Central Laboratory of Public Health	Centers for Disease Control and Prevention	NA
EPI_ISL_409619	South America / Paraguay	2019-11-14	B/Paraguay/8532/2019	Central Laboratory of Public Health	Centers for Disease Control and Prevention	NA
EPI_ISL_409624	South America / Colombia	2020-01-03	B/Colombia/7472/2020	Instituto Nacional de Salud de Columbia	Centers for Disease Control and Prevention	NA
EPI_ISL_409642	South America / Paraguay	2019-12-12	B/Paraguay/5474/2019	Central Laboratory of Public Health	Centers for Disease Control and Prevention	NA
EPI_ISL_409645	South America / Paraguay	2019-11-28	B/Paraguay/1771/2019	Central Laboratory of Public Health	Centers for Disease Control and Prevention	NA
EPI_ISL_409647	South America / Paraguay	2019-11-28	B/Paraguay/1770/2019	Central Laboratory of Public Health	Centers for Disease Control and Prevention	NA
EPI_ISL_409652	South America / Paraguay	2019-11-26	B/Paraguay/1473/2019	Central Laboratory of Public Health	Centers for Disease Control and Prevention	NA
EPI_ISL_409838	Africa / Tunisia	2019-12-30	B/Tunis/31/2019	National Influenza Centre-Tunis, Unit Virology, Microbiology Laboratory, Charles Nicolle's Hospital	Crick Worldwide Influenza Centre	NA
EPI_ISL_410115	South America / Brazil / Estado da Paraiba	2019-07-02	B/Paraiba/158174-IEC/2019	Evandro Chagas Institute	Evandro Chagas Institute	NA
EPI_ISL_410117	South America / Brazil / Estado do Amazonas	2019-07-10	B/Amazonas/158409-IEC/2019	Evandro Chagas Institute	Evandro Chagas Institute	NA
EPI_ISL_410118	South America / Brazil / Estado de Pernambuco	2019-08-27	B/Pernambuco/158848-IEC/2019	Evandro Chagas Institute	Evandro Chagas Institute	NA
EPI_ISL_410119	South America / Brazil / Estado de Pernambuco	2019-08-16	B/Pernambuco/158846-IEC/2019	Evandro Chagas Institute	Evandro Chagas Institute	NA
EPI_ISL_410120	South America / Brazil / Estado do Acre	2019-12-05	B/Acre/159870-IEC/2019	Evandro Chagas Institute	Evandro Chagas Institute	NA
EPI_ISL_410123	South America / Brazil / Estado do Acre	2019-12-02	B/Acre/159666-IEC/2019	Evandro Chagas Institute	Evandro Chagas Institute	NA
EPI_ISL_410125	South America / Brazil / Estado de Pernambuco	2019-09-05	B/Pernambuco/159117-IEC/2019	Evandro Chagas Institute	Evandro Chagas Institute	NA
EPI_ISL_410135	Asia / China / Sichuan Province / Chengdu	2019-12-07	B/Sichuan-Qingyang/12039/2019	WHO Chinese National Influenza Center	WHO Chinese National Influenza Center	Xiyan,Li ; Jia, Liu; Dayan, Wang
EPI_ISL_410193	Oceania / Australia / Kippax	2019-10-14	B/Canberra/87/2019	Canberra Hospital	WHO Collaborating Centre for Reference and Research on Influenza	Deng,Y-M; Iannello,P; Lau,H; Todd,A; Spirason,N; Moselen,J; Komadina,N.
EPI_ISL_410195	Asia / Thailand / Chiang Rai	2019-12-13	B/Chiang Rai/1387/2019	WHO National Influenza Centre, National Institute of Medical Research (NIMR)	WHO Collaborating Centre for Reference and Research on Influenza	Deng,Y-M; Iannello,P; Lau,H; Todd,A; Spirason,N; Moselen,J; Komadina,N.
EPI_ISL_410199	Asia / Cambodia / Khett Kandal	2019-12-07	B/Cambodia/FSS41540/2019	Institute Pasteur du Cambodia	WHO Collaborating Centre for Reference and Research on Influenza	Deng,Y-M; Iannello,P; Lau,H; Todd,A; Spirason,N; Moselen,J; Komadina,N.
EPI_ISL_410202	Asia / Cambodia / Khett Kampong Cham	2019-12-10	B/Cambodia/E0109366/2019	Institute Pasteur du Cambodia	WHO Collaborating Centre for Reference and Research on Influenza	Deng,Y-M; Iannello,P; Lau,H; Todd,A; Spirason,N; Moselen,J; Komadina,N.
EPI_ISL_410204	Oceania / Australia / Victoria / Brunswick	2020-01-17	B/Victoria/1/2020	Victorian Infectious Diseases Reference Laboratory	WHO Collaborating Centre for Reference and Research on Influenza	Deng,Y-M; Iannello,P; Lau,H; Todd,A; Spirason,N; Moselen,J; Komadina,N.
EPI_ISL_410206	Asia / Malaysia / Federal Territory of Kuala Lumpur	2019-08-01	B/Malaysia/UM008/2019	University Malaya	WHO Collaborating Centre for Reference and Research on Influenza	Deng,Y-M; Iannello,P; Lau,H; Todd,A; Spirason,N; Moselen,J; Komadina,N.
EPI_ISL_410208	Asia / Brunei	2019-08-14	B/Brunei/13/2019	R.I.P.A.S. Hospital, Department of Laboratory Services	WHO Collaborating Centre for Reference and Research on Influenza	Deng,Y-M; Iannello,P; Lau,H; Todd,A; Spirason,N; Moselen,J; Komadina,N.
EPI_ISL_410296	Asia / Sri Lanka / Eastern	2020-01-20	B/Sri Lanka/16/2020	Medical Research Institute	WHO Collaborating Centre for Reference and Research on Influenza	Deng,Y-M; Iannello,P; Lau,H; Todd,A; Spirason,N; Moselen,J; Komadina,N.
EPI_ISL_410298	Asia / Sri Lanka / Western	2019-12-10	B/Sri Lanka/26/2019	Medical Research Institute	WHO Collaborating Centre for Reference and Research on Influenza	Deng,Y-M; Iannello,P; Lau,H; Todd,A; Spirason,N; Moselen,J; Komadina,N.
EPI_ISL_410491	Asia / Japan	2019-12-09	B/MIE/13/2019	Mie Prefecture Health and Environment Research Institute	National Institute of Infectious Diseases (NIID)	Takashita,Emi;Fujisaki,Seiichiro;Shirakura,Masayuki;Watanabe,Shinji;Hasegawa,Hideki
EPI_ISL_410547	Asia / China / Hunan	2019-11-29	B/Hunan-Jiahe/314/2019	WHO Chinese National Influenza Center	WHO Chinese National Influenza Center	Xiyan,Li;Jia,Liu; Dayan,Wang
EPI_ISL_410548	Asia / China / Hunan	2019-12-03	B/Hunan-Louxin/1961/2019	WHO Chinese National Influenza Center	WHO Chinese National Influenza Center	Xiyan,Li;Jia,Liu; Dayan,Wang
EPI_ISL_410549	Asia / China	2019-11-21	B/Guangxi-Xinning/11047/2019	WHO Chinese National Influenza Center	WHO Chinese National Influenza Center	Xiyan,Li;Jia,Liu; Dayan,Wang
EPI_ISL_410550	Asia / China / Guangxi	2019-12-07	B/Guangxi-Yuzhou/11323/2019	WHO Chinese National Influenza Center	WHO Chinese National Influenza Center	Xiyan,Li;Jia,Liu; Dayan,Wang
EPI_ISL_410551	Asia / China / Henan	2019-12-09	B/Henan-Hubin/1656/2019	WHO Chinese National Influenza Center	WHO Chinese National Influenza Center	Xiyan,Li;Jia,Liu; Dayan,Wang
EPI_ISL_410552	Asia / China / Zhejiang	2019-12-10	B/Zhejiang-Wuyi/335/2019	WHO Chinese National Influenza Center	WHO Chinese National Influenza Center	Xiyan,Li;Jia,Liu; Dayan,Wang
EPI_ISL_410553	Asia / China / Zhejiang	2019-12-09	B/Zhejiang-Kecheng/11046/2019	WHO Chinese National Influenza Center	WHO Chinese National Influenza Center	Xiyan,Li;Jia,Liu; Dayan,Wang
EPI_ISL_410554	Asia / China / Zhejiang	2019-12-14	B/Zhejiang-Yongkang/11004/2019	WHO Chinese National Influenza Center	WHO Chinese National Influenza Center	Xiyan,Li;Jia,Liu; Dayan,Wang
EPI_ISL_410555	Asia / China / Hunan	2019-12-09	B/Hunan-Liuyang/3140/2019	WHO Chinese National Influenza Center	WHO Chinese National Influenza Center	Xiyan,Li;Jia,Liu; Dayan,Wang
EPI_ISL_410556	Asia / China / Hunan	2019-12-09	B/Hunan-Liuyang/3140/2019	WHO Chinese National Influenza Center	WHO Chinese National Influenza Center	Xiyan,Li;Jia,Liu; Dayan,Wang
EPI_ISL_410557	Asia / China / Zhejiang	2019-12-10	B/Zhejiang-Kecheng/11058/2019	WHO Chinese National Influenza Center	WHO Chinese National Influenza Center	Xiyan,Li;Jia,Liu; Dayan,Wang
EPI_ISL_410558	Asia / China / Zhejiang	2019-12-10	B/Zhejiang-Kecheng/11058/2019	WHO Chinese National Influenza Center	WHO Chinese National Influenza Center	Xiyan,Li;Jia,Liu; Dayan,Wang
EPI_ISL_410559	Asia / China / Jiangxi	2019-12-12	B/Jiangxi-Xinzhou/1974/2019	WHO Chinese National Influenza Center	WHO Chinese National Influenza Center	Xiyan,Li;Jia,Liu; Dayan,Wang
EPI_ISL_410560	Asia / China	2019-12-16	B/Shanghai-Huangpu/11014/2019	WHO Chinese National Influenza Center	WHO Chinese National Influenza Center	Xiyan,Li;Jia,Liu; Dayan,Wang
EPI_ISL_410561	Asia / China	2019-12-16	B/Shanghai-Huangpu/11014/2019	WHO Chinese National Influenza Center	WHO Chinese National Influenza Center	Xiyan,Li;Jia,Liu; Dayan,Wang
EPI_ISL_410562	Asia / China / Fujian	2019-12-06	B/Fujian-Longhai/375/2019	WHO Chinese National Influenza Center	WHO Chinese National Influenza Center	Xiyan,Li;Jia,Liu; Dayan,Wang
EPI_ISL_410563	Asia / China / Fujian	2019-12-06	B/Fujian-Longhai/375/2019	WHO Chinese National Influenza Center	WHO Chinese National Influenza Center	Xiyan,Li;Jia,Liu; Dayan,Wang
EPI_ISL_410564	Asia / China / Hubei	2019-12-10	B/Hubei-Huangshigang/11130/2019	WHO Chinese National Influenza Center	WHO Chinese National Influenza Center	Xiyan,Li;Jia,Liu; Dayan,Wang
EPI_ISL_410565	Asia / China / Beijing	2019-12-23	B/Beijing-Huairou/11858/2019	WHO Chinese National Influenza Center	WHO Chinese National Influenza Center	Xiyan,Li;Jia,Liu; Dayan,Wang
EPI_ISL_410566	Asia / China / Henan	2019-12-17	B/Henan-Xiangcheng/1680/2019	WHO Chinese National Influenza Center	WHO Chinese National Influenza Center	Xiyan,Li;Jia,Liu; Dayan,Wang
EPI_ISL_410567	Asia / China / Guangxi	2019-12-13	B/Guangxi-Lingshan/3102/2019	WHO Chinese National Influenza Center	WHO Chinese National Influenza Center	Xiyan,Li;Jia,Liu; Dayan,Wang
EPI_ISL_410568	Asia / China / Guizhou	2019-11-25	B/Guizhou-Honghuagang/1965/2019	WHO Chinese National Influenza Center	WHO Chinese National Influenza Center	Xiyan,Li;Jia,Liu; Dayan,Wang
EPI_ISL_410569	Asia / China / Beijing	2019-11-27	B/Beijing-Haidian/1746/2019	WHO Chinese National Influenza Center	WHO Chinese National Influenza Center	Xiyan,Li;Jia,Liu; Dayan,Wang
EPI_ISL_410570	Asia / China / Tianjin	2019-12-16	B/Tianjin-Jinnan/3137/2019	WHO Chinese National Influenza Center	WHO Chinese National Influenza Center	Xiyan,Li;Jia,Liu; Dayan,Wang
EPI_ISL_410571	Asia / China / Chongqing	2019-12-17	B/Chongqing-Yuzhong/12102/2019	WHO Chinese National Influenza Center	WHO Chinese National Influenza Center	Xiyan,Li;Jia,Liu; Dayan,Wang
EPI_ISL_410572	Asia / China / Hunan	2019-12-16	B/Hunan-Jishou/12904/2019	WHO Chinese National Influenza Center	WHO Chinese National Influenza Center	Xiyan,Li;Jia,Liu; Dayan,Wang
EPI_ISL_410573	Asia / China	2019-12-04	B/Sichuan-Jiangyang/11603/2019	WHO Chinese National Influenza Center	WHO Chinese National Influenza Center	Xiyan,Li;Jia,Liu; Dayan,Wang
EPI_ISL_410574	Asia / China / Anhui	2019-11-25	B/Anhui-Tianjiaan/11023/2019	WHO Chinese National Influenza Center	WHO Chinese National Influenza Center	Xiyan,Li;Jia,Liu; Dayan,Wang
EPI_ISL_410575	Asia / China / Hubei	2019-12-03	B/Hubei-Enshi/1981/2019	WHO Chinese National Influenza Center	WHO Chinese National Influenza Center	Xiyan,Li;Jia,Liu; Dayan,Wang
EPI_ISL_410576	Asia / China / Zhejiang	2019-12-18	B/Zhejiang-Lanxi/320/2019	WHO Chinese National Influenza Center	WHO Chinese National Influenza Center	Xiyan,Li;Jia,Liu; Dayan,Wang
EPI_ISL_410577	Asia / China / Sichuan	2019-11-26	B/Sichuan-Jingyang/12048/2019	WHO Chinese National Influenza Center	WHO Chinese National Influenza Center	Xiyan,Li;Jia,Liu; Dayan,Wang
EPI_ISL_410578	Asia / China / Sichuan	2019-11-26	B/Sichuan-Jingyang/12048/2019	WHO Chinese National Influenza Center	WHO Chinese National Influenza Center	Xiyan,Li;Jia,Liu; Dayan,Wang
EPI_ISL_410579	Asia / China / Zhejiang	2019-11-17	B/Zhejiang-Jiaojiang/11018/2019	WHO Chinese National Influenza Center	WHO Chinese National Influenza Center	Xiyan,Li;Jia,Liu; Dayan,Wang
EPI_ISL_410580	Asia / China	2019-01-19	B/Washington/02/2019	WHO Chinese National Influenza Center	WHO Chinese National Influenza Center	Xiyan,Li;Jia,Liu; Dayan,Wang
EPI_ISL_410581	Asia / China / Tianjin	2020-01-01	B/Tianjin-Nankai/121/2020	WHO Chinese National Influenza Center	WHO Chinese National Influenza Center	Xiyan,Li;Jia,Liu; Dayan,Wang
EPI_ISL_410582	Asia / China / Hunan	2020-01-02	B/Hunan-Yuhu/114/2020	WHO Chinese National Influenza Center	WHO Chinese National Influenza Center	Xiyan,Li;Jia,Liu; Dayan,Wang
EPI_ISL_410583	Asia / China / Beijing	2020-01-07	B/Beijing-Huairou/147/2020	WHO Chinese National Influenza Center	WHO Chinese National Influenza Center	Xiyan,Li;Jia,Liu; Dayan,Wang
EPI_ISL_410584	Asia / China / Sichuan	2020-01-05	B/Sichuan-Anyue/113/2020	WHO Chinese National Influenza Center	WHO Chinese National Influenza Center	Xiyan,Li;Jia,Liu; Dayan,Wang
EPI_ISL_410585	Asia / China / Xinjiang	2020-01-02	B/Xinjiang-Tianshan/113/2020	WHO Chinese National Influenza Center	WHO Chinese National Influenza Center	Xiyan,Li;Jia,Liu; Dayan,Wang
EPI_ISL_410586	Asia / China / Zhejiang	2020-01-06	B/Zhejiang-Nanhu/112/2020	WHO Chinese National Influenza Center	WHO Chinese National Influenza Center	Xiyan,Li;Jia,Liu; Dayan,Wang
EPI_ISL_410587	Asia / China / Shandong	2020-01-08	B/Shandong-Dongying/160/2020	WHO Chinese National Influenza Center	WHO Chinese National Influenza Center	Xiyan,Li;Jia,Liu; Dayan,Wang
EPI_ISL_410588	Asia / China / Fujian	2020-01-06	B/Fujian-Xinluo/146/2020	WHO Chinese National Influenza Center	WHO Chinese National Influenza Center	Xiyan,Li;Jia,Liu; Dayan,Wang
EPI_ISL_410639	Asia / China / Zhejiang	2019-12-09	B/Zhejiang-Yiwu/1976/2019	WHO Chinese National Influenza Center	WHO Chinese National Influenza Center	Xiyan,Li;Jia,Liu; Dayan,Wang
EPI_ISL_410640	Asia / China / Zhejiang	2019-12-04	B/Zhejiang-Wuxin/11013/2019	WHO Chinese National Influenza Center	WHO Chinese National Influenza Center	Xiyan,Li;Jia,Liu; Dayan,Wang
EPI_ISL_410641	Asia / China / Zhejiang	2019-12-10	B/Zhejiang-Nanhu/11025/2019	WHO Chinese National Influenza Center	WHO Chinese National Influenza Center	Xiyan,Li;Jia,Liu; Dayan,Wang
EPI_ISL_410642	Asia / China / Zhejiang	2019-12-06	B/Zhejiang-Kecheng/3135/2019	WHO Chinese National Influenza Center	WHO Chinese National Influenza Center	Xiyan,Li;Jia,Liu; Dayan,Wang
EPI_ISL_410643	Asia / China / Zhejiang	2019-12-10	B/Zhejiang-Yuhang/3139/2019	WHO Chinese National Influenza Center	WHO Chinese National Influenza Center	Xiyan,Li;Jia,Liu; Dayan,Wang
EPI_ISL_410644	Asia / China / Fujian	2019-12-02	B/Fujian-Tongan/358/2019	WHO Chinese National Influenza Center	WHO Chinese National Influenza Center	Xiyan,Li;Jia,Liu; Dayan,Wang
EPI_ISL_410645	Asia / China / Jiangsu	2019-11-27	B/Jiangsu-Qinhuai/1953/2019	WHO Chinese National Influenza Center	WHO Chinese National Influenza Center	Xiyan,Li;Jia,Liu; Dayan,Wang
EPI_ISL_410646	Asia / China / Jiangxi	2019-11-25	B/Jiangxi-Xinzhou/1949/2019	WHO Chinese National Influenza Center	WHO Chinese National Influenza Center	Xiyan,Li;Jia,Liu; Dayan,Wang
EPI_ISL_411137	Europe / Romania	2020-01-13	B/Arges/256326/2020	Cantacuzino Institute	Crick Worldwide Influenza Centre	NA
EPI_ISL_411162	Europe / Spain	2019-10-23	B/Valladolid/299/2019	Universidad de Valladolid	Crick Worldwide Influenza Centre	NA
EPI_ISL_412279	Asia / Bahrain	2020-01-05	B/Bahrain/6/2020	Ministry of Health Bahrain	Centers for Disease Control and Prevention	NA
EPI_ISL_412282	Asia / Bahrain	2019-12-19	B/Bahrain/871/2019	Ministry of Health Bahrain	Centers for Disease Control and Prevention	NA
EPI_ISL_412284	Asia / Bahrain	2019-12-14	B/Bahrain/858/2019	Ministry of Health Bahrain	Centers for Disease Control and Prevention	NA
EPI_ISL_412287	Asia / Bahrain	2019-11-28	B/Bahrain/788/2019	Ministry of Health Bahrain	Centers for Disease Control and Prevention	NA
EPI_ISL_412288	Asia / Bahrain	2019-11-27	B/Bahrain/784/2019	Ministry of Health Bahrain	Centers for Disease Control and Prevention	NA
EPI_ISL_412298	North America / United States / Texas	2019-12-24	B/Texas/152/2019	San Antonio Metropolitan Health	Centers for Disease Control and Prevention	NA
EPI_ISL_412410	Europe / Sweden / Uppsala lan	2020-01-15	B/Uppsala/1/2020	Klinisk mikrobiologi, Akademiska sjukhuset Uppsala	Public Health Agency of Sweden	NA
EPI_ISL_412615	Asia / Japan	2019-12-10	B/Japan/10595/2019	U.S. Air Force School of Aerospace Medicine	U.S. Air Force School of Aerospace Medicine	Gruner, W.E.; Fries, A.C.; Garrett, C.M.; Powell, M.L.; Hanson, J.F.; DeMarcus, L.S.; Sjoberg, P.A.; Bogue, A.L.; Robbins, A.S.; Macias, E.A.; Lambert, A.W.; Dane, D.J.
EPI_ISL_412616	Asia / Japan	2019-12-10	B/Japan/10596/2019	U.S. Air Force School of Aerospace Medicine	U.S. Air Force School of Aerospace Medicine	Gruner, W.E.; Fries, A.C.; Garrett, C.M.; Powell, M.L.; Hanson, J.F.; DeMarcus, L.S.; Sjoberg, P.A.; Bogue, A.L.; Robbins, A.S.; Macias, E.A.; Lambert, A.W.; Dane, D.J.
EPI_ISL_412917	South America / Chile / Region Metropolitana de Santiago	2019-08-22	B/Santiago/76009/2019	Instituto de Salud Publica de Chile	Instituto de Salud Publica de Chile	Tognarelli, J.; Lagos, J.; Arata, L.; Fasce, R.; Fernandez, J.
EPI_ISL_412919	South America / Chile / Region Metropolitana de Santiago	2019-08-23	B/Santiago/76566/2019	Instituto de Salud Publica de Chile	Instituto de Salud Publica de Chile	Tognarelli, J.; Lagos, J.; Arata, L.; Fasce, R.; Fernandez, J.
EPI_ISL_412926	South America / Chile / Vina_Del_Mar	2019-08-23	B/Vina_Del_Mar/79888/2019	Instituto de Salud Publica de Chile	Instituto de Salud Publica de Chile	Tognarelli, J.; Lagos, J.; Arata, L.; Fasce, R.; Fernandez, J.
EPI_ISL_412927	South America / Chile / Iquique	2019-08-21	B/Iquique/80174/2019	Instituto de Salud Publica de Chile	Instituto de Salud Publica de Chile	Tognarelli, J.; Lagos, J.; Arata, L.; Fasce, R.; Fernandez, J.
EPI_ISL_412935	South America / Chile / Iquique	2019-08-28	B/Iquique/82815/2019	Instituto de Salud Publica de Chile	Instituto de Salud Publica de Chile	Tognarelli, J.; Lagos, J.; Arata, L.; Fasce, R.; Fernandez, J.
EPI_ISL_412938	South America / Chile / Region Metropolitana de Santiago	2019-09-19	B/Santiago/84177/2019	Instituto de Salud Publica de Chile	Instituto de Salud Publica de Chile	Tognarelli, J.; Lagos, J.; Arata, L.; Fasce, R.; Fernandez, J.
EPI_ISL_412951	South America / Chile / Puerto_Montt	2019-10-23	B/Puerto_Montt/95747/2019	Instituto de Salud Publica de Chile	Instituto de Salud Publica de Chile	Tognarelli, J.; Lagos, J.; Arata, L.; Fasce, R.; Fernandez, J.
EPI_ISL_412954	South America / Chile / Region Metropolitana de Santiago	2019-09-26	B/Santiago/86128/2019	Instituto de Salud Publica de Chile	Instituto de Salud Publica de Chile	Tognarelli, J.; Lagos, J.; Arata, L.; Fasce, R.; Fernandez, J.
EPI_ISL_413361	Asia / Japan	2019-09-02	B/Yokohama/18/2019	National Institute of Infectious Diseases (NIID)	Centers for Disease Control and Prevention	NA
EPI_ISL_413365	Asia / Japan	2019-10-27	B/Niigata-C/6/2019	National Institute of Infectious Diseases (NIID)	Centers for Disease Control and Prevention	NA
EPI_ISL_413401	North America / United States / New York	2020-01-30	B/New York/14/2020	New York State Department of Health	Centers for Disease Control and Prevention	NA
EPI_ISL_413405	Asia / China	2019-11-17	B/Zhejiang-Jiaojiang/11018/2019	WHO Chinese National Influenza Center	Centers for Disease Control and Prevention	NA
EPI_ISL_413406	Asia / China	2019-11-26	B/Sichuan-Jingyang/12048/2019	WHO Chinese National Influenza Center	Centers for Disease Control and Prevention	NA
EPI_ISL_413409	Europe / Ukraine	2019-12-27	B/Kyiv/358/2019	Institute of Epidemiology and Infectious Diseases AMS of Ukraine	Centers for Disease Control and Prevention	NA
EPI_ISL_413417	Africa / Madagascar	2019-11-15	B/Madagascar/6679/2019	Institut Pasteur de Madagascar	Centers for Disease Control and Prevention	NA
EPI_ISL_413811	Africa / Madagascar	2019-07-18	B/Madagascar/4379/2019	Institut Pasteur de Madagascar	Centers for Disease Control and Prevention	NA
EPI_ISL_413812	Africa / Madagascar	2019-07-30	B/Madagascar/4482/2019	Institut Pasteur de Madagascar	Centers for Disease Control and Prevention	NA
EPI_ISL_413813	Africa / Madagascar	2019-08-14	B/Madagascar/4789/2019	Institut Pasteur de Madagascar	Centers for Disease Control and Prevention	NA
EPI_ISL_413815	Africa / Madagascar	2019-07-15	B/Madagascar/4223/2019	Institut Pasteur de Madagascar	Centers for Disease Control and Prevention	NA
EPI_ISL_413823	Europe / Ukraine	2019-10-01	B/Kyiv/279/2019	Institute of Epidemiology and Infectious Diseases AMS of Ukraine	Centers for Disease Control and Prevention	NA
EPI_ISL_414389	Asia / Japan	2019-10-21	B/OITA/2/2019	Oita Prefectural Institute of Health and Environment	National Institute of Infectious Diseases (NIID)	Takashita,Emi;Fujisaki,Seiichiro;Shirakura,Masayuki;Watanabe,Shinji;Hasegawa,Hideki
EPI_ISL_414404	Asia / Japan	2019-12-17	B/SAITAMA/62/2019	Saitama Institute of Public Health	National Institute of Infectious Diseases (NIID)	Takashita,Emi;Fujisaki,Seiichiro;Shirakura,Masayuki;Watanabe,Shinji;Hasegawa,Hideki
EPI_ISL_414409	Asia / Japan	2020-01-08	B/YOKOHAMA/1/2020	Yokohama City Institute of Public Health.	National Institute of Infectious Diseases (NIID)	Takashita,Emi;Fujisaki,Seiichiro;Shirakura,Masayuki;Watanabe,Shinji;Hasegawa,Hideki
EPI_ISL_414410	Asia / Japan	2020-01-11	B/YOKOHAMA/2/2020	Yokohama City Institute of Public Health.	National Institute of Infectious Diseases (NIID)	Takashita,Emi;Fujisaki,Seiichiro;Shirakura,Masayuki;Watanabe,Shinji;Hasegawa,Hideki
EPI_ISL_415060	Asia / Korea, Republic of	2020-01-03	B/South Korea/11418/2020	U.S. Air Force School of Aerospace Medicine	U.S. Air Force School of Aerospace Medicine	Gruner, W.E.; Fries, A.C.; Garrett, C.M.; Powell, M.L.; Hanson, J.F.; DeMarcus, L.S.; Sjoberg, P.A.; Bogue, A.L.; Robbins, A.S.; Macias, E.A.; Lambert, A.W.; Dane, D.J.
EPI_ISL_415061	Asia / Korea, Republic of	2020-01-06	B/South Korea/11419/2020	U.S. Air Force School of Aerospace Medicine	U.S. Air Force School of Aerospace Medicine	Gruner, W.E.; Fries, A.C.; Garrett, C.M.; Powell, M.L.; Hanson, J.F.; DeMarcus, L.S.; Sjoberg, P.A.; Bogue, A.L.; Robbins, A.S.; Macias, E.A.; Lambert, A.W.; Dane, D.J.
EPI_ISL_415167	Asia / Japan	2020-01-20	B/KANAGAWA/AC1934/2020	National Institute of Infectious Diseases (NIID)	National Institute of Infectious Diseases (NIID)	Takashita,Emi;Fujisaki,Seiichiro;Shirakura,Masayuki;Watanabe,Shinji;Hasegawa,Hideki
EPI_ISL_415852	Europe / Russian Federation	2019-12-17	B/Moscow/33/2019	Ivanovsky Research Institute of Virology RAMS	Centers for Disease Control and Prevention	NA
EPI_ISL_415853	Europe / Russian Federation	2019-12-18	B/Moscow/31/2019	Ivanovsky Research Institute of Virology RAMS	Centers for Disease Control and Prevention	NA
EPI_ISL_415867	Asia / Afghanistan	2019-07-21	B/Afghanistan/1040/2019	National Public Health Laboratory	Centers for Disease Control and Prevention	NA
EPI_ISL_415876	North America / United States / Delaware	2020-02-20	B/Delaware/10/2020	Delaware Public Health Lab	Centers for Disease Control and Prevention	NA
EPI_ISL_415894	Africa / Congo, the Democatic Republic of	2019-12-16	B/Congo/9774/2019	INRB Service de Virologie	Centers for Disease Control and Prevention	NA
EPI_ISL_415895	Asia / Afghanistan	2019-09-07	B/Afghanistan/1586/2019	National Public Health Laboratory	Centers for Disease Control and Prevention	NA
EPI_ISL_415900	Africa / Congo, the Democatic Republic of	2019-12-19	B/Congo/9752/2019	INRB Service de Virologie	Centers for Disease Control and Prevention	NA
EPI_ISL_415901	Africa / Congo, the Democatic Republic of	2019-12-16	B/Congo/9749/2019	INRB Service de Virologie	Centers for Disease Control and Prevention	NA
EPI_ISL_415903	Africa / Congo, the Democatic Republic of	2019-12-11	B/Congo/9738/2019	INRB Service de Virologie	Centers for Disease Control and Prevention	NA
EPI_ISL_415909	Asia / Afghanistan	2019-11-06	B/Afghanistan/2271/2019	National Public Health Laboratory	Centers for Disease Control and Prevention	NA
EPI_ISL_415910	Europe / Russian Federation	2019-12-12	B/Moscow/29/2019	Ivanovsky Research Institute of Virology RAMS	Centers for Disease Control and Prevention	NA
EPI_ISL_415982	North America / United States / Texas	2020-01-28	B/Texas/16/2020	Texas Department of State Health Services-Laboratory Services	Centers for Disease Control and Prevention	NA
EPI_ISL_416004	Africa / Mali	2019-10-29	B/Mali/154/2019	NIC Lab CVD-MALI	Centers for Disease Control and Prevention	NA
EPI_ISL_416005	Africa / Mali	2019-11-12	B/Mali/180/2019	NIC Lab CVD-MALI	Centers for Disease Control and Prevention	NA
EPI_ISL_416006	Africa / Mali	2019-10-31	B/Mali/149/2019	NIC Lab CVD-MALI	Centers for Disease Control and Prevention	NA
EPI_ISL_416007	Africa / Mali	2019-11-19	B/Mali/187/2019	NIC Lab CVD-MALI	Centers for Disease Control and Prevention	NA
EPI_ISL_416056	Africa / Cameroon	2019-08-09	B/Cameroon/6127/2019	Centre Pasteur du Cameroun	Crick Worldwide Influenza Centre	NA
EPI_ISL_416057	Africa / Cameroon	2019-09-23	B/Cameroon/6970/2019	Centre Pasteur du Cameroun	Crick Worldwide Influenza Centre	NA
EPI_ISL_416087	Europe / Ireland	2019-11-12	B/Ireland/90048/2019	UCD National Virus Reference Laboratory	Crick Worldwide Influenza Centre	NA
EPI_ISL_416090	Europe / France	2019-08-06	B/La Reunion/2124/2019	CNR Virus des Infections Respiratoires - France SUD	Crick Worldwide Influenza Centre	NA
EPI_ISL_416091	Europe / France	2019-09-13	B/La Reunion/2152/2019	CNR Virus des Infections Respiratoires - France SUD	Crick Worldwide Influenza Centre	NA
EPI_ISL_416114	Africa / Morocco	2020-01-27	B/Oujda/936/2020	Institut National d'Hygi&egrave;ne	Crick Worldwide Influenza Centre	NA
EPI_ISL_416937	Europe / Russian Federation	2019-11-27	B/Vladivostok/6/2019	Ivanovsky Research Institute of Virology RAMS	Centers for Disease Control and Prevention	NA
EPI_ISL_4169465	Asia / China / Gansu	2021-03-12	B/Gansu-Wudou/1305/2021	WHO Chinese National Influenza Center	WHO Chinese National Influenza Center	Li Xiyan, Huang Weijuan, Dayan Wang
EPI_ISL_4169466	Asia / China / Gansu	2021-04-13	B/Gansu-Baiyin/1281/2021	WHO Chinese National Influenza Center	WHO Chinese National Influenza Center	Li Xiyan, Huang Weijuan, Dayan Wang
EPI_ISL_4169467	Asia / China / Sichuan	2021-08-02	B/Sichuan-Wenjiang/2160/2021	WHO Chinese National Influenza Center	WHO Chinese National Influenza Center	Li Xiyan, Huang Weijuan, Dayan Wang
EPI_ISL_4169468	Asia / China / Sichuan	2021-08-03	B/Sichuan-Jinjiang/8234/2021	WHO Chinese National Influenza Center	WHO Chinese National Influenza Center	Li Xiyan, Huang Weijuan, Dayan Wang
EPI_ISL_4169469	Asia / China / Zhejiang	2021-08-09	B/Zhejiang-Shangcheng/1871/2021	WHO Chinese National Influenza Center	WHO Chinese National Influenza Center	Li Xiyan, Huang Weijuan, Dayan Wang
EPI_ISL_416947	Europe / Russian Federation	2019-12-02	B/Moscow/19/2019	Ivanovsky Research Institute of Virology RAMS	Centers for Disease Control and Prevention	NA
EPI_ISL_4169470	Asia / China	2021-08-09	B/Zhejiang-Fenghua/2252/2021	WHO Chinese National Influenza Center	WHO Chinese National Influenza Center	Li Xiyan, Huang Weijuan, Dayan Wang
EPI_ISL_4169471	Asia / China / Zhejiang	2021-08-02	B/Zhejiang-Haishu/11533/2021	WHO Chinese National Influenza Center	WHO Chinese National Influenza Center	Li Xiyan, Huang Weijuan, Dayan Wang
EPI_ISL_4169472	Asia / China / Hainan	2021-06-30	B/Hainan-Xiuying/1549/2021	WHO Chinese National Influenza Center	WHO Chinese National Influenza Center	Li Xiyan, Huang Weijuan, Dayan Wang
EPI_ISL_4169474	Asia / China / Hainan	2021-07-14	B/Hainan-Xiuying/1588/2021	WHO Chinese National Influenza Center	WHO Chinese National Influenza Center	Li Xiyan, Huang Weijuan, Dayan Wang
EPI_ISL_416948	Asia / Afghanistan	2019-11-19	B/Afghanistan/2419/2019	National Public Health Laboratory	Centers for Disease Control and Prevention	NA
EPI_ISL_4169493	Asia / China / Chongqing	2021-08-09	B/Chongqing-Yubei/1804/2021	WHO Chinese National Influenza Center	WHO Chinese National Influenza Center	Li Xiyan, Huang Weijuan, Dayan Wang
EPI_ISL_4169503	Asia / China / Yunnan	2021-07-22	B/Yunnan-Chuxiong/1928/2021	WHO Chinese National Influenza Center	WHO Chinese National Influenza Center	Li Xiyan, Huang Weijuan, Dayan Wang
EPI_ISL_4169512	Asia / China / Beijing	2021-07-27	B/Beijing-Chaoyang/11745/2021	WHO Chinese National Influenza Center	WHO Chinese National Influenza Center	Li Xiyan, Huang Weijuan, Dayan Wang
EPI_ISL_4169522	Asia / China / Guangxi	2021-07-23	B/Guangxi-Haicheng/1604/2021	WHO Chinese National Influenza Center	WHO Chinese National Influenza Center	Li Xiyan, Huang Weijuan, Dayan Wang
EPI_ISL_4169523	Asia / China	2021-06-19	B/Shanghai-Huangpu/1922/2021	WHO Chinese National Influenza Center	WHO Chinese National Influenza Center	Li Xiyan, Huang Weijuan, Dayan Wang
EPI_ISL_4169524	Asia / China	2021-06-19	B/Shanghai-Huangpu/1922/2021	WHO Chinese National Influenza Center	WHO Chinese National Influenza Center	Li Xiyan, Huang Weijuan, Dayan Wang
EPI_ISL_4169525	Asia / China / Hunan	2021-06-01	B/Hunan-Kaifu/1433/2021	WHO Chinese National Influenza Center	WHO Chinese National Influenza Center	Li Xiyan, Huang Weijuan, Dayan Wang
EPI_ISL_4169526	Asia / China / Hunan	2021-06-01	B/Hunan-Kaifu/1433/2021	WHO Chinese National Influenza Center	WHO Chinese National Influenza Center	Li Xiyan, Huang Weijuan, Dayan Wang
EPI_ISL_4169527	Asia / China / Hebei	2021-06-22	B/Hebei-Luquan/1628/2021	WHO Chinese National Influenza Center	WHO Chinese National Influenza Center	Li Xiyan, Huang Weijuan, Dayan Wang
EPI_ISL_4169528	Asia / China / Guangxi	2021-05-08	B/Guangxi-Qinbei/32/2021	WHO Chinese National Influenza Center	WHO Chinese National Influenza Center	Li Xiyan, Huang Weijuan, Dayan Wang
EPI_ISL_4169529	Asia / China / Henan	2021-07-05	B/Henan-Xigong/1326/2021	WHO Chinese National Influenza Center	WHO Chinese National Influenza Center	Li Xiyan, Huang Weijuan, Dayan Wang
EPI_ISL_4169530	Asia / China / Henan	2021-07-05	B/Henan-Xigong/1326/2021	WHO Chinese National Influenza Center	WHO Chinese National Influenza Center	Li Xiyan, Huang Weijuan, Dayan Wang
EPI_ISL_4169531	Asia / China / Guangdong	2021-06-28	B/Guangdong-Zhenjiang/1516/2021	WHO Chinese National Influenza Center	WHO Chinese National Influenza Center	Li Xiyan, Huang Weijuan, Dayan Wang
EPI_ISL_4169532	Asia / China / Guangdong	2021-06-28	B/Guangdong-Zhenjiang/1516/2021	WHO Chinese National Influenza Center	WHO Chinese National Influenza Center	Li Xiyan, Huang Weijuan, Dayan Wang
EPI_ISL_4169533	Asia / China / Sichuan	2021-07-01	B/Sichuan-Santai/1571/2021	WHO Chinese National Influenza Center	WHO Chinese National Influenza Center	Li Xiyan, Huang Weijuan, Dayan Wang
EPI_ISL_4169534	Asia / China / Guangdong	2021-07-07	B/Guangdong-Futian/1748/2021	WHO Chinese National Influenza Center	WHO Chinese National Influenza Center	Li Xiyan, Huang Weijuan, Dayan Wang
EPI_ISL_4169535	Asia / China / Fujian	2021-07-05	B/Fujian-Xinluo/11452/2021	WHO Chinese National Influenza Center	WHO Chinese National Influenza Center	Li Xiyan, Huang Weijuan, Dayan Wang
EPI_ISL_4169536	Asia / China / Neimenggu	2021-06-08	B/Neimenggu-Xincheng/1358/2021	WHO Chinese National Influenza Center	WHO Chinese National Influenza Center	Li Xiyan, Huang Weijuan, Dayan Wang
EPI_ISL_4169537	Asia / China / Sichuan	2021-07-07	B/Sichuan-Wuhou/2135/2021	WHO Chinese National Influenza Center	WHO Chinese National Influenza Center	Li Xiyan, Huang Weijuan, Dayan Wang
EPI_ISL_4169538	Asia / China / Sichuan	2021-06-16	B/Sichuan-Gaoxin/1667/2021	WHO Chinese National Influenza Center	WHO Chinese National Influenza Center	Li Xiyan, Huang Weijuan, Dayan Wang
EPI_ISL_4169539	Asia / China / Henan	2021-06-22	B/Henan-Luolong/1328/2021	WHO Chinese National Influenza Center	WHO Chinese National Influenza Center	Li Xiyan, Huang Weijuan, Dayan Wang
EPI_ISL_4169540	Asia / China / Zhejiang	2021-06-16	B/Zhejiang-Cixi/2458/2021	WHO Chinese National Influenza Center	WHO Chinese National Influenza Center	Li Xiyan, Huang Weijuan, Dayan Wang
EPI_ISL_4169541	Asia / China / Fujian	2021-07-05	B/Fujian-Tongan/1660/2021	WHO Chinese National Influenza Center	WHO Chinese National Influenza Center	Li Xiyan, Huang Weijuan, Dayan Wang
EPI_ISL_4169542	Asia / China / Fujian	2021-06-01	B/Fujian-Sanyuan/2541/2021	WHO Chinese National Influenza Center	WHO Chinese National Influenza Center	Li Xiyan, Huang Weijuan, Dayan Wang
EPI_ISL_4169543	Asia / China / Qinghai	2021-06-17	B/Qinghai-Datonghuizutuzuzizhi/2314/2021	WHO Chinese National Influenza Center	WHO Chinese National Influenza Center	Li Xiyan, Huang Weijuan, Dayan Wang
EPI_ISL_4169544	Asia / China / Guangdong	2021-07-02	B/Guangdong-Renhua/34/2021	WHO Chinese National Influenza Center	WHO Chinese National Influenza Center	Li Xiyan, Huang Weijuan, Dayan Wang
EPI_ISL_4169545	Asia / China / Zhejiang	2021-07-06	B/Zhejiang-Haishu/11360/2021	WHO Chinese National Influenza Center	WHO Chinese National Influenza Center	Li Xiyan, Huang Weijuan, Dayan Wang
EPI_ISL_4169546	Asia / China / Qinghai	2021-06-05	B/Qinghai-Gangcha/1202/2021	WHO Chinese National Influenza Center	WHO Chinese National Influenza Center	Li Xiyan, Huang Weijuan, Dayan Wang
EPI_ISL_4169551	Asia / China / Guizhou	2021-06-23	B/Guizhou-Bijiang/1499/2021	WHO Chinese National Influenza Center	WHO Chinese National Influenza Center	Li Xiyan, Huang Weijuan, Dayan Wang
EPI_ISL_4169552	Asia / China / Qinghai	2021-05-25	B/Qinghai-Chengdong/1548/2021	WHO Chinese National Influenza Center	WHO Chinese National Influenza Center	Li Xiyan, Huang Weijuan, Dayan Wang
EPI_ISL_4169553	Asia / China / Qinghai	2021-05-25	B/Sichuan-Jingyang/11550/2021	WHO Chinese National Influenza Center	WHO Chinese National Influenza Center	Li Xiyan, Huang Weijuan, Dayan Wang
EPI_ISL_4169554	Asia / China	2021-07-20	B/Shanghai-Fengxian/1635/2021	WHO Chinese National Influenza Center	WHO Chinese National Influenza Center	Li Xiyan, Huang Weijuan, Dayan Wang
EPI_ISL_4169555	Asia / China / Hubei	2021-07-08	B/Hubei-Wujiagang/1645/2021	WHO Chinese National Influenza Center	WHO Chinese National Influenza Center	Li Xiyan, Huang Weijuan, Dayan Wang
EPI_ISL_4169556	Asia / China / Yunnan	2021-07-06	B/Yunnan-Honghe/31/2021	WHO Chinese National Influenza Center	WHO Chinese National Influenza Center	Li Xiyan, Huang Weijuan, Dayan Wang
EPI_ISL_4169557	Asia / China / Chongqing	2021-07-21	B/Chongqing-Yuzhong/1713/2021	WHO Chinese National Influenza Center	WHO Chinese National Influenza Center	Li Xiyan, Huang Weijuan, Dayan Wang
EPI_ISL_4169558	Asia / China / Guangxi	2021-07-01	B/Guangxi-Yuzhou/1773/2021	WHO Chinese National Influenza Center	WHO Chinese National Influenza Center	Li Xiyan, Huang Weijuan, Dayan Wang
EPI_ISL_4169559	Asia / China / Guangxi	2021-07-14	B/Guangxi-Jiangzhou/1558/2021	WHO Chinese National Influenza Center	WHO Chinese National Influenza Center	Li Xiyan, Huang Weijuan, Dayan Wang
EPI_ISL_4169560	Asia / China / Jiangxi	2021-07-02	B/Jiangxi-Linchuan/1823/2021	WHO Chinese National Influenza Center	WHO Chinese National Influenza Center	Li Xiyan, Huang Weijuan, Dayan Wang
EPI_ISL_4169561	Asia / China / Guangdong	2021-07-21	B/Guangdong-Zhenjiang/1581/2021	WHO Chinese National Influenza Center	WHO Chinese National Influenza Center	Li Xiyan, Huang Weijuan, Dayan Wang
EPI_ISL_4169562	Asia / China / Guangxi	2021-07-15	B/Guangxi-Jinchengjiang/1670/2021	WHO Chinese National Influenza Center	WHO Chinese National Influenza Center	Li Xiyan, Huang Weijuan, Dayan Wang
EPI_ISL_4169563	Asia / China / Fujian	2021-07-07	B/Fujian-Sanyuan/2644/2021	WHO Chinese National Influenza Center	WHO Chinese National Influenza Center	Li Xiyan, Huang Weijuan, Dayan Wang
EPI_ISL_4169565	Asia / China / Hebei	2021-07-14	B/Hebei-Cixian/1644/2021	WHO Chinese National Influenza Center	WHO Chinese National Influenza Center	Li Xiyan, Huang Weijuan, Dayan Wang
EPI_ISL_4169566	Asia / China / Zhejiang	2021-07-12	B/Zhejiang-Haishu/11380/2021	WHO Chinese National Influenza Center	WHO Chinese National Influenza Center	Li Xiyan, Huang Weijuan, Dayan Wang
EPI_ISL_4169567	Asia / China / Jiangxi	2021-07-14	B/Jiangxi-Donghu/11327/2021	WHO Chinese National Influenza Center	WHO Chinese National Influenza Center	Li Xiyan, Huang Weijuan, Dayan Wang
EPI_ISL_4169568	Asia / China / Guangdong	2021-07-12	B/Guangdong-Zhongshan/1595/2021	WHO Chinese National Influenza Center	WHO Chinese National Influenza Center	Li Xiyan, Huang Weijuan, Dayan Wang
EPI_ISL_4169569	Asia / China / Jiangxi	2021-07-13	B/Jiangxi-Zhanggong/1706/2021	WHO Chinese National Influenza Center	WHO Chinese National Influenza Center	Li Xiyan, Huang Weijuan, Dayan Wang
EPI_ISL_4169570	Asia / China / Jiangxi	2021-07-13	B/Jiangxi-Jizhou/1643/2021	WHO Chinese National Influenza Center	WHO Chinese National Influenza Center	Li Xiyan, Huang Weijuan, Dayan Wang
EPI_ISL_4169571	Asia / China / Jiangxi	2021-07-12	B/Jiangxi-Anyuan/1657/2021	WHO Chinese National Influenza Center	WHO Chinese National Influenza Center	Li Xiyan, Huang Weijuan, Dayan Wang
EPI_ISL_4169572	Asia / China / Hebei	2021-07-07	B/Hebei-Hanshan/11248/2021	WHO Chinese National Influenza Center	WHO Chinese National Influenza Center	Li Xiyan, Huang Weijuan, Dayan Wang
EPI_ISL_4169573	Asia / China / Hubei	2021-07-06	B/Hubei-Xiantao/33/2021	WHO Chinese National Influenza Center	WHO Chinese National Influenza Center	Li Xiyan, Huang Weijuan, Dayan Wang
EPI_ISL_4169574	Asia / China / Hubei	2021-07-09	B/Hubei-Yingcheng/299/2021	WHO Chinese National Influenza Center	WHO Chinese National Influenza Center	Li Xiyan, Huang Weijuan, Dayan Wang
EPI_ISL_4169575	Asia / China / Hubei	2021-07-09	B/Fujian-Sanyuan/2670/2021	WHO Chinese National Influenza Center	WHO Chinese National Influenza Center	Li Xiyan, Huang Weijuan, Dayan Wang
EPI_ISL_4169576	Asia / China / Shanghai	2021-07-08	B/Shanghai-Qingpu/1539/2021	WHO Chinese National Influenza Center	WHO Chinese National Influenza Center	Li Xiyan, Huang Weijuan, Dayan Wang
EPI_ISL_4169577	Asia / China / Guangxi	2021-07-09	B/Guangxi-Haicheng/1561/2021	WHO Chinese National Influenza Center	WHO Chinese National Influenza Center	Li Xiyan, Huang Weijuan, Dayan Wang
EPI_ISL_4169578	Asia / China / Jiangxi	2021-07-06	B/Jiangxi-Zhushan/1663/2021	WHO Chinese National Influenza Center	WHO Chinese National Influenza Center	Li Xiyan, Huang Weijuan, Dayan Wang
EPI_ISL_4169579	Asia / China / Hubei	2021-07-06	B/Hubei-Shashi/1887/2021	WHO Chinese National Influenza Center	WHO Chinese National Influenza Center	Li Xiyan, Huang Weijuan, Dayan Wang
EPI_ISL_4169580	Asia / China / Sichuan	2021-07-14	B/Sichuan-Gaoxin/1744/2021	WHO Chinese National Influenza Center	WHO Chinese National Influenza Center	Li Xiyan, Huang Weijuan, Dayan Wang
EPI_ISL_4169581	Asia / China / Chongqing	2021-07-08	B/Chongqing-Fuling/1461/2021	WHO Chinese National Influenza Center	WHO Chinese National Influenza Center	Li Xiyan, Huang Weijuan, Dayan Wang
EPI_ISL_4169582	Asia / China / Fujian	2021-07-04	B/Fujian-Cangshan/1657/2021	WHO Chinese National Influenza Center	WHO Chinese National Influenza Center	Li Xiyan, Huang Weijuan, Dayan Wang
EPI_ISL_416959	Asia / Kuwait	2019-10-20	B/Kuwait/5778/2019	Public Health Laboratory, Virology Unit	Centers for Disease Control and Prevention	NA
EPI_ISL_416964	Asia / Kuwait	2019-09-30	B/Kuwait/4877/2019	Public Health Laboratory, Virology Unit	Centers for Disease Control and Prevention	NA
EPI_ISL_416969	South America / Suriname	2019-12-11	B/Suriname/1088/2019	Central Laboratory, Bureau of Public Health	Centers for Disease Control and Prevention	NA
EPI_ISL_416978	South America / Brazil	2019-12-16	B/Rio De Janeiro/1152/2019	Instituto Oswaldo Cruz FIOCRUZ - Laboratory of Respiratory Viruses and Measles (LVRS)	Centers for Disease Control and Prevention	NA
EPI_ISL_416988	South America / Brazil	2019-08-17	B/Rio Grande Do Sul/1044/2019	Instituto Oswaldo Cruz FIOCRUZ - Laboratory of Respiratory Viruses and Measles (LVRS)	Centers for Disease Control and Prevention	NA
EPI_ISL_416990	South America / Brazil	2019-09-11	B/Bahia/1009/2019	Instituto Oswaldo Cruz FIOCRUZ - Laboratory of Respiratory Viruses and Measles (LVRS)	Centers for Disease Control and Prevention	NA
EPI_ISL_416993	South America / Brazil	2019-08-13	B/Bahia/1004/2019	Instituto Oswaldo Cruz FIOCRUZ - Laboratory of Respiratory Viruses and Measles (LVRS)	Centers for Disease Control and Prevention	NA
EPI_ISL_418476	Africa / Morocco	2019-11-25	B/Fes/158/2019	Institut National d'Hygi&egrave;ne	Crick Worldwide Influenza Centre	NA
EPI_ISL_418479	Africa / Morocco	2019-11-20	B/Meknes/127/2019	Institut National d'Hygi&egrave;ne	Crick Worldwide Influenza Centre	NA
EPI_ISL_418487	Asia / Qatar	2019-10-20	B/Qatar/13-VI-19-0063573/2019	Supreme Health Council	Crick Worldwide Influenza Centre	NA
EPI_ISL_418488	Asia / Qatar	2019-10-17	B/Qatar/47-VI-19-0062540/2019	Supreme Health Council	Crick Worldwide Influenza Centre	NA
EPI_ISL_418499	Africa / Tunisia	2019-12-30	B/Tunis/31/2019	National Influenza Centre-Tunis, Unit Virology, Microbiology Laboratory, Charles Nicolle's Hospital	Crick Worldwide Influenza Centre	NA
EPI_ISL_419642	Asia / Malaysia	2019-11-24	B/Malaysia/RP4275/2019	Institut Penyelidikan Perubatan	WHO Collaborating Centre for Reference and Research on Influenza	Deng,Y-M; Iannello,P; Lau,H; Todd,A; Spirason,N; Moselen,J; Komadina,N.
EPI_ISL_419644	Oceania / Australia / Victoria / Port Melbourne	2020-01-27	B/Victoria/15/2020	Alfred Hospital	WHO Collaborating Centre for Reference and Research on Influenza	Deng,Y-M; Iannello,P; Lau,H; Todd,A; Spirason,N; Moselen,J; Komadina,N.
EPI_ISL_419645	Oceania / Australia / Victoria / Glen Iris	2020-01-27	B/Victoria/14/2020	Alfred Hospital	WHO Collaborating Centre for Reference and Research on Influenza	Deng,Y-M; Iannello,P; Lau,H; Todd,A; Spirason,N; Moselen,J; Komadina,N.
EPI_ISL_419646	Oceania / Australia / Australian Capital Territory / Ngunnawal	2020-01-25	B/Canberra/3/2020	Canberra Hospital	WHO Collaborating Centre for Reference and Research on Influenza	Deng,Y-M; Iannello,P; Lau,H; Todd,A; Spirason,N; Moselen,J; Komadina,N.
EPI_ISL_419647	Oceania / Australia / South Australia / Adelaide	2020-02-04	B/South Australia/7/2020	Institute of Medical and Veterinary Science (IMVS)	WHO Collaborating Centre for Reference and Research on Influenza	Deng,Y-M; Iannello,P; Lau,H; Todd,A; Spirason,N; Moselen,J; Komadina,N.
EPI_ISL_4197188	Asia / China	2021	B/Sichuan-Jingyang/12048/2019	CSL Ltd	WHO Collaborating Centre for Reference and Research on Influenza	Deng,Y-M; Iannello,P; Lau,H; Spirason,N; Moselen,J; Aziz,A; Komadina,N.
EPI_ISL_4197189	Asia / China	2021	BVR-27 (B/Sichuan-Jingyang/12048/2019)	CSL Ltd	WHO Collaborating Centre for Reference and Research on Influenza	Deng,Y-M; Iannello,P; Lau,H; Spirason,N; Moselen,J; Aziz,A; Komadina,N.
EPI_ISL_421020	Asia / Pakistan	2020-01-16	B/Pakistan/38/2020	National Institute of Health	Centers for Disease Control and Prevention	NA
EPI_ISL_421043	South America / Suriname	2019-10-31	B/Suriname/1027/2019	Central Laboratory, Bureau of Public Health	Centers for Disease Control and Prevention	NA
EPI_ISL_421067	Asia / Lebanon	2020-01-29	B/Lebanon/9/2020	Rafic Hariri University Hospital 4th floor DNA/Research Lab	Centers for Disease Control and Prevention	NA
EPI_ISL_421068	Asia / Lebanon	2020-01-29	B/Lebanon/12/2020	Rafic Hariri University Hospital 4th floor DNA/Research Lab	Centers for Disease Control and Prevention	NA
EPI_ISL_421070	Asia / Lebanon	2020-02-02	B/Lebanon/16/2020	Rafic Hariri University Hospital 4th floor DNA/Research Lab	Centers for Disease Control and Prevention	NA
EPI_ISL_421074	South America / Bolivia, Plurinationial State of	2019-10-08	B/Bolivia/1919/2019	Instituto Nacional de Laboratoriosde Salud (INLASA)	Centers for Disease Control and Prevention	NA
EPI_ISL_421075	South America / Bolivia, Plurinationial State of	2019-10-14	B/Bolivia/1940/2019	Instituto Nacional de Laboratoriosde Salud (INLASA)	Centers for Disease Control and Prevention	NA
EPI_ISL_424780	South America / Bolivia, Plurinationial State of	2019-10-18	B/Bolivia/1966/2019	Instituto Nacional de Laboratoriosde Salud (INLASA)	Centers for Disease Control and Prevention	NA
EPI_ISL_424785	South America / Bolivia, Plurinationial State of	2019-10-17	B/Bolivia/1960/2019	Instituto Nacional de Laboratoriosde Salud (INLASA)	Centers for Disease Control and Prevention	NA
EPI_ISL_424795	North America / United States / North Carolina	2020-03-06	B/North Carolina/10/2020	North Carolina State Laboratory of Public Health	Centers for Disease Control and Prevention	NA
EPI_ISL_424805	North America / United States / Nevada	2020-03-12	B/Nevada/12/2020	Southern Nevada Public Health Lab	Centers for Disease Control and Prevention	NA
EPI_ISL_424821	North America / United States / Wisconsin	2020-03-13	B/Wisconsin/66/2020	Wisconsin State Laboratory of Hygiene	Centers for Disease Control and Prevention	NA
EPI_ISL_424823	Asia / Taiwan	2019-09-24	B/Taiwan/83280/2019	ADImmune Corporation	Centers for Disease Control and Prevention	NA
EPI_ISL_424824	Asia / Taiwan	2019-12-03	B/Taiwan/83701/2019	ADImmune Corporation	Centers for Disease Control and Prevention	NA
EPI_ISL_424830	North America / United States / South Dakota	2020-03-10	B/South Dakota/12/2020	South Dakota Public Health Lab	Centers for Disease Control and Prevention	NA
EPI_ISL_424831	South America / Bolivia, Plurinationial State of	2019-10-18	B/Bolivia/1974/2019	Instituto Nacional de Laboratoriosde Salud (INLASA)	Centers for Disease Control and Prevention	NA
EPI_ISL_426262	Africa / Mauritius	2019-10-11	B/Mauritius/I-2823/2019	Central Health Laboratory	Crick Worldwide Influenza Centre	NA
EPI_ISL_426264	Africa / Mauritius	2019-10-31	B/Mauritius/I-2936/2019	Central Health Laboratory	Crick Worldwide Influenza Centre	NA
EPI_ISL_426589	Europe / Sweden / Norrbottens lan	2020-01-27	B/Sweden/14/2020	Public Health Agency of Sweden	Public Health Agency of Sweden	NA
EPI_ISL_428087	Europe / Germany	2020-01-25	B/Germany/11733/2020	U.S. Air Force School of Aerospace Medicine	U.S. Air Force School of Aerospace Medicine	Gruner, W.E.; Fries, A.C.; Garrett, C.M.; Powell, M.L.; Hanson, J.F.; DeMarcus, L.S.; Sjoberg, P.A.; Bogue, A.L.; Robbins, A.S.; Macias, E.A.; Lambert, A.W.; Dane, D.J.
EPI_ISL_428167	Asia / Korea, Republic of	2020-01-24	B/South Korea/11812/2020	U.S. Air Force School of Aerospace Medicine	U.S. Air Force School of Aerospace Medicine	Gruner, W.E.; Fries, A.C.; Garrett, C.M.; Powell, M.L.; Hanson, J.F.; DeMarcus, L.S.; Sjoberg, P.A.; Bogue, A.L.; Robbins, A.S.; Macias, E.A.; Lambert, A.W.; Dane, D.J.
EPI_ISL_428423	Asia / Taiwan	2019-10-25	B/Taiwan/70765/2019	Center for Disease Control	National Institute of Infectious Diseases (NIID)	Takashita,Emi;Fujisaki,Seiichiro;Shirakura,Masayuki;Watanabe,Shinji;Hasegawa,Hideki
EPI_ISL_428495	Europe / United Kingdom / MIDDLESEX	2019-11-29	B/England/693/2019	Microbiology Services Colindale, Public Health England	Microbiology Services Colindale, Public Health England	NA
EPI_ISL_428820	Oceania / Australia / Victoria / Glen Waverley	2019-11-29	B/Victoria/2110/2019	Alfred Hospital	WHO Collaborating Centre for Reference and Research on Influenza	Deng,Y-M; Iannello,P; Lau,H; Todd,A; Spirason,N; Moselen,J; Komadina,N.
EPI_ISL_428821	Oceania / Australia / Victoria / Mentone	2019-11-15	B/Victoria/2113/2019	Alfred Hospital	WHO Collaborating Centre for Reference and Research on Influenza	Deng,Y-M; Iannello,P; Lau,H; Todd,A; Spirason,N; Moselen,J; Komadina,N.
EPI_ISL_429965	Europe / Slovenia	2020-03-17	B/Slovenia/2232/2020	Laboratory for Virology, National Institute of Public Health	Crick Worldwide Influenza Centre	NA
EPI_ISL_430298	Oceania / Australia	2020-01-28	B/Victoria/5/2020	Victorian Infectious Diseases Reference Laboratory	WHO Collaborating Centre for Reference and Research on Influenza	Deng,Y-M; Iannello,P; Lau,H; Todd,A; Spirason,N; Moselen,J; Komadina,N.
EPI_ISL_430299	Oceania / Australia / Richmond	2019-12-04	B/Sydney/1079/2019	Institute of Medical and Veterinary Science (IMVS)	WHO Collaborating Centre for Reference and Research on Influenza	Deng,Y-M; Iannello,P; Lau,H; Todd,A; Spirason,N; Moselen,J; Komadina,N.
EPI_ISL_430300	Oceania / Australia / Whyalla	2019-12-30	B/South Australia/163/2019	Institute of Medical and Veterinary Science (IMVS)	WHO Collaborating Centre for Reference and Research on Influenza	Deng,Y-M; Iannello,P; Lau,H; Todd,A; Spirason,N; Moselen,J; Komadina,N.
EPI_ISL_430302	Asia / Sri Lanka / Eastern	2020-01-16	B/Sri Lanka/15/2020	Medical Research Institute	WHO Collaborating Centre for Reference and Research on Influenza	Deng,Y-M; Iannello,P; Lau,H; Todd,A; Spirason,N; Moselen,J; Komadina,N.
EPI_ISL_430304	Asia / Sri Lanka / Western	2019-12-26	B/Sri Lanka/30/2019	Medical Research Institute	WHO Collaborating Centre for Reference and Research on Influenza	Deng,Y-M; Iannello,P; Lau,H; Todd,A; Spirason,N; Moselen,J; Komadina,N.
EPI_ISL_430305	Asia / Cambodia / Khett Preah Vihear	2019-09-22	B/Cambodia/FSS42224/2019	Institute Pasteur du Cambodia	WHO Collaborating Centre for Reference and Research on Influenza	Deng,Y-M; Iannello,P; Lau,H; Todd,A; Spirason,N; Moselen,J; Komadina,N.
EPI_ISL_430306	Asia / Cambodia / Battambang	2019-10-16	B/Cambodia/D1031360/2019	Institute Pasteur du Cambodia	WHO Collaborating Centre for Reference and Research on Influenza	Deng,Y-M; Iannello,P; Lau,H; Todd,A; Spirason,N; Moselen,J; Komadina,N.
EPI_ISL_430307	Asia / Cambodia / Phnom Penh	2019-10-14	B/Cambodia/D1120364/2019	Institute Pasteur du Cambodia	WHO Collaborating Centre for Reference and Research on Influenza	Deng,Y-M; Iannello,P; Lau,H; Todd,A; Spirason,N; Moselen,J; Komadina,N.
EPI_ISL_430781	North America / United States / Nevada	2020-03-12	B/Nevada/12/2020	Southern Nevada Public Health Lab	Centers for Disease Control and Prevention	NA
EPI_ISL_435334	North America / United States / New Jersey	2020-03-11	B/New Jersey/12/2020	New Jersey Department of Health & Senior Services	Centers for Disease Control and Prevention	NA
EPI_ISL_435337	North America / United States / Connecticut	2020-03-14	B/Connecticut/17/2020	Connecticut Department. of Public Health	Centers for Disease Control and Prevention	NA
EPI_ISL_435338	Asia / Hong Kong (SAR)	2019-06-17	B/Hong Kong/574/2019	National Institute for Medical Research	Centers for Disease Control and Prevention	NA
EPI_ISL_4379560	Asia / China	2021-03-01	B/Jiangxi-Zhushan/1164/2021	WHO Chinese National Influenza Center	Centers for Disease Control and Prevention	NA
EPI_ISL_4379579	Asia / China	2021-02-17	B/Henan-Xigong/1118/2021	WHO Chinese National Influenza Center	Centers for Disease Control and Prevention	NA
EPI_ISL_4379598	Asia / China	2021-03-29	B/Henan-Shanyang/37/2021	WHO Chinese National Influenza Center	Centers for Disease Control and Prevention	NA
EPI_ISL_4379619	Asia / China	2021-03-22	B/Fujian-Zhangpu/34/2021	WHO Chinese National Influenza Center	Centers for Disease Control and Prevention	NA
EPI_ISL_4379713	Asia / China	2021-04-13	B/Gansu-Baiyin/1281/2021	WHO Chinese National Influenza Center	Centers for Disease Control and Prevention	NA
EPI_ISL_4379794	Asia / China	2021-03-30	B/Gansu-Chengguan/1515/2021	WHO Chinese National Influenza Center	Centers for Disease Control and Prevention	NA
EPI_ISL_443155	North America / United States / Michigan	2020-02-11	B/Michigan/98/2020	Michigan Department of Community Health	Centers for Disease Control and Prevention	NA
EPI_ISL_443160	Africa / Nigeria	2019-07-11	B/Nigeria/4013/2019	NCDC Public Health Reference Laboratory	Centers for Disease Control and Prevention	NA
EPI_ISL_443161	Africa / Nigeria	2019-08-26	B/Nigeria/4085/2019	NCDC Public Health Reference Laboratory	Centers for Disease Control and Prevention	NA
EPI_ISL_444802	Europe / Sweden / Vastra Gotalands lan	2020-03-04	B/Sweden/48/2020	Public Health Agency of Sweden	Public Health Agency of Sweden	NA
EPI_ISL_444815	Europe / Sweden / Uppsala lan	2020-04-02	B/Sweden/60/2020	Public Health Agency of Sweden	Public Health Agency of Sweden	NA
EPI_ISL_444816	Europe / Sweden / Uppsala lan	2020-04-02	B/Sweden/61/2020	Public Health Agency of Sweden	Public Health Agency of Sweden	NA
EPI_ISL_4458446	Asia / China	2019-11-26	B/Sichuan-Jingyang/12048/2019 BVR-27 (21/248)	CSL Ltd	National Institute for Biological Standards and Control (NIBSC)	Nicolson, Carolyn
EPI_ISL_451950	Oceania / Australia / Victoria / Hawthorn East	2020-01-25	B/Victoria/16/2020	Alfred Hospital	WHO Collaborating Centre for Reference and Research on Influenza	Deng,Y-M; Iannello,P; Lau,H; Todd,A; Spirason,N; Moselen,J; Komadina,N.
EPI_ISL_451952	Oceania / Australia / Western Australia / Applecross	2020-02-05	B/Perth/3/2020	Pathwest QE II Medical Centre	WHO Collaborating Centre for Reference and Research on Influenza	Deng,Y-M; Iannello,P; Lau,H; Todd,A; Spirason,N; Moselen,J; Komadina,N.
EPI_ISL_451953	Oceania / Australia / New South Wales / West Ryde	2020-02-15	B/Sydney/2/2020	Childrens Hospital Westmead	WHO Collaborating Centre for Reference and Research on Influenza	Deng,Y-M; Iannello,P; Lau,H; Todd,A; Spirason,N; Moselen,J; Komadina,N.
EPI_ISL_451954	Oceania / Australia / Western Australia / Bulls Creek	2020-02-02	B/Perth/1/2020	Pathwest QE II Medical Centre	WHO Collaborating Centre for Reference and Research on Influenza	Deng,Y-M; Iannello,P; Lau,H; Todd,A; Spirason,N; Moselen,J; Komadina,N.
EPI_ISL_451955	Oceania / Australia / Queensland / Mackay	2020-01-05	B/Townsville/1/2020	Queensland Health Forensic and Scientific Services	WHO Collaborating Centre for Reference and Research on Influenza	Deng,Y-M; Iannello,P; Lau,H; Todd,A; Spirason,N; Moselen,J; Komadina,N.
EPI_ISL_451956	Oceania / Australia / Queensland / Cannonvale	2019-11-11	B/Townsville/15/2019	Queensland Health Forensic and Scientific Services	WHO Collaborating Centre for Reference and Research on Influenza	Deng,Y-M; Iannello,P; Lau,H; Todd,A; Spirason,N; Moselen,J; Komadina,N.
EPI_ISL_4520693	Asia / China / Shanghai	2021-08-25	B/Shanghai-Fengxian/1749/2021	WHO Chinese National Influenza Center	WHO Chinese National Influenza Center	Li Xiyan,Liu Jia, Dayan Wang
EPI_ISL_4520694	Asia / China / Shanghai	2021-08-23	B/Shanghai-Baoshan/1671/2021	WHO Chinese National Influenza Center	WHO Chinese National Influenza Center	Li Xiyan,Liu Jia, Dayan Wang
EPI_ISL_4520695	Asia / China / Beijing	2021-08-31	B/Beijing-Chaoyang/12099/2021	WHO Chinese National Influenza Center	WHO Chinese National Influenza Center	Li Xiyan,Liu Jia, Dayan Wang
EPI_ISL_4520696	Asia / China / Beijing	2021-08-09	B/Beijing-Chaoyang/11871/2021	WHO Chinese National Influenza Center	WHO Chinese National Influenza Center	Li Xiyan,Liu Jia, Dayan Wang
EPI_ISL_4520697	Asia / China / Guangdong	2021-08-17	B/Guangdong-Yuexiu/11326/2021	WHO Chinese National Influenza Center	WHO Chinese National Influenza Center	Li Xiyan,Liu Jia, Dayan Wang
EPI_ISL_4520698	Asia / China / Guangxi	2021-08-09	B/Guangxi-Jinchengjiang/1776/2021	WHO Chinese National Influenza Center	WHO Chinese National Influenza Center	Li Xiyan,Liu Jia, Dayan Wang
EPI_ISL_4520699	Asia / China / Henan	2021-08-22	B/Henan-Zhaoling/1359/2021	WHO Chinese National Influenza Center	WHO Chinese National Influenza Center	Li Xiyan,Liu Jia, Dayan Wang
EPI_ISL_4520700	Asia / China / Zhejiang	2021-08-23	B/Zhejiang-Nanhu/1795/2021	WHO Chinese National Influenza Center	WHO Chinese National Influenza Center	Li Xiyan,Liu Jia, Dayan Wang
EPI_ISL_4520701	Asia / China / Zhejiang	2021-08-22	B/Zhejiang-Fenghua/2290/2021	WHO Chinese National Influenza Center	WHO Chinese National Influenza Center	Li Xiyan,Liu Jia, Dayan Wang
EPI_ISL_4520702	Asia / China / Zhejiang	2021-08-09	B/Zhejiang-Cixi/2525/2021	WHO Chinese National Influenza Center	WHO Chinese National Influenza Center	Li Xiyan,Liu Jia, Dayan Wang
EPI_ISL_4520703	Asia / China / Zhejiang	2021-08-10	B/Zhejiang-Ninghai/2531/2021	WHO Chinese National Influenza Center	WHO Chinese National Influenza Center	Li Xiyan,Liu Jia, Dayan Wang
EPI_ISL_4520704	Asia / China / Zhejiang	2021-08-14	B/Zhejiang-Jiaojiang/1802/2021	WHO Chinese National Influenza Center	WHO Chinese National Influenza Center	Li Xiyan,Liu Jia, Dayan Wang
EPI_ISL_4520705	Asia / China / Zhejiang	2021-08-17	B/Zhejiang-Haishu/11642/2021	WHO Chinese National Influenza Center	WHO Chinese National Influenza Center	Li Xiyan,Liu Jia, Dayan Wang
EPI_ISL_4520706	Asia / China / Hubei	2021-08-22	B/Hubei-Xiaonan/11443/2021	WHO Chinese National Influenza Center	WHO Chinese National Influenza Center	Li Xiyan,Liu Jia, Dayan Wang
EPI_ISL_4520707	Asia / China / Hubei	2021-08-24	B/Hubei-Dangyang/2300/2021	WHO Chinese National Influenza Center	WHO Chinese National Influenza Center	Li Xiyan,Liu Jia, Dayan Wang
EPI_ISL_4520708	Asia / China / Hubei	2021-08-30	B/Hubei-Duodao/511/2021	WHO Chinese National Influenza Center	WHO Chinese National Influenza Center	Li Xiyan,Liu Jia, Dayan Wang
EPI_ISL_4520709	Asia / China / Hubei	2021-08-30	B/Hubei-Maojian/11690/2021	WHO Chinese National Influenza Center	WHO Chinese National Influenza Center	Li Xiyan,Liu Jia, Dayan Wang
EPI_ISL_4520710	Asia / China / Hubei	2021-09-01	B/Hubei-Maojian/11727/2021	WHO Chinese National Influenza Center	WHO Chinese National Influenza Center	Li Xiyan,Liu Jia, Dayan Wang
EPI_ISL_4520711	Asia / China / Hubei	2021-08-24	B/Hubei-Echeng/11358/2021	WHO Chinese National Influenza Center	WHO Chinese National Influenza Center	Li Xiyan,Liu Jia, Dayan Wang
EPI_ISL_4520712	Asia / China / Hubei	2021-08-17	B/Hubei-Xiangcheng/1790/2021	WHO Chinese National Influenza Center	WHO Chinese National Influenza Center	Li Xiyan,Liu Jia, Dayan Wang
EPI_ISL_4520713	Asia / China / Shanghai	2021-08-05	B/Shanghai-Jingan/12767/2021	WHO Chinese National Influenza Center	WHO Chinese National Influenza Center	Li Xiyan,Liu Jia, Dayan Wang
EPI_ISL_4520714	Asia / China / Shanghai	2021-08-19	B/Shanghai-Qingpu/1658/2021	WHO Chinese National Influenza Center	WHO Chinese National Influenza Center	Li Xiyan,Liu Jia, Dayan Wang
EPI_ISL_4520715	Asia / China / Guangdong	2021-08-23	B/Guangdong-Pengjiang/1903/2021	WHO Chinese National Influenza Center	WHO Chinese National Influenza Center	Li Xiyan,Liu Jia, Dayan Wang
EPI_ISL_4520716	Asia / China / Shanghai	2021-08-04	B/Shanghai-Changning/1900/2021	WHO Chinese National Influenza Center	WHO Chinese National Influenza Center	Li Xiyan,Liu Jia, Dayan Wang
EPI_ISL_4520717	Asia / China / Guangdong	2021-08-26	B/Guangdong-Dongwanbendi/1674/2021	WHO Chinese National Influenza Center	WHO Chinese National Influenza Center	Li Xiyan,Liu Jia, Dayan Wang
EPI_ISL_4520718	Asia / China / Hubei	2021-09-02	B/Hubei-Wujiagang/1782/2021	WHO Chinese National Influenza Center	WHO Chinese National Influenza Center	Li Xiyan,Liu Jia, Dayan Wang
EPI_ISL_4520720	Asia / China / Hainan	2021-08-09	B/Hainan-Meilan/1651/2021	WHO Chinese National Influenza Center	WHO Chinese National Influenza Center	Li Xiyan,Liu Jia, Dayan Wang
EPI_ISL_4520721	Asia / China / Shanghai	2021-08-13	B/Shanghai-Songjiang/1639/2021	WHO Chinese National Influenza Center	WHO Chinese National Influenza Center	Li Xiyan,Liu Jia, Dayan Wang
EPI_ISL_4520722	Asia / China / Guangxi	2021-08-01	B/Guangxi-Jinchengjiang/1751/2021	WHO Chinese National Influenza Center	WHO Chinese National Influenza Center	Li Xiyan,Liu Jia, Dayan Wang
EPI_ISL_4520725	Asia / China / Hubei	2021-08-08	B/Hubei-Maojian/11535/2021	WHO Chinese National Influenza Center	WHO Chinese National Influenza Center	Li Xiyan,Liu Jia, Dayan Wang
EPI_ISL_4520726	Asia / China / Hubei	2021-08-06	B/Hubei-Zhangwan/2152/2021	WHO Chinese National Influenza Center	WHO Chinese National Influenza Center	Li Xiyan,Liu Jia, Dayan Wang
EPI_ISL_4520727	Asia / China / Hubei	2021-08-01	B/Hubei-Wuchang/717/2021	WHO Chinese National Influenza Center	WHO Chinese National Influenza Center	Li Xiyan,Liu Jia, Dayan Wang
EPI_ISL_4520728	Asia / China / Hainan	2021-08-04	B/Hainan-Meilan/1638/2021	WHO Chinese National Influenza Center	WHO Chinese National Influenza Center	Li Xiyan,Liu Jia, Dayan Wang
EPI_ISL_4520729	Asia / China / Hainan	2021-08-09	B/Hainan-Meilan/1647/2021	WHO Chinese National Influenza Center	WHO Chinese National Influenza Center	Li Xiyan,Liu Jia, Dayan Wang
EPI_ISL_4520730	Asia / China / Hainan	2021-08-03	B/Hainan-Wenchang/1779/2021	WHO Chinese National Influenza Center	WHO Chinese National Influenza Center	Li Xiyan,Liu Jia, Dayan Wang
EPI_ISL_4520731	Asia / China / Guangdong	2021-08-02	B/Guangdong-Zhenjiang/1608/2021	WHO Chinese National Influenza Center	WHO Chinese National Influenza Center	Li Xiyan,Liu Jia, Dayan Wang
EPI_ISL_4520732	Asia / China / Guangdong	2021-08-09	B/Guangdong-Pengjiang/1849/2021	WHO Chinese National Influenza Center	WHO Chinese National Influenza Center	Li Xiyan,Liu Jia, Dayan Wang
EPI_ISL_4520733	Asia / China / Shanghai	2021-08-02	B/Shanghai-Fengxian/1671/2021	WHO Chinese National Influenza Center	WHO Chinese National Influenza Center	Li Xiyan,Liu Jia, Dayan Wang
EPI_ISL_4520734	Asia / China / Shanghai	2021-08-16	B/Shanghai-Baoshan/1648/2021	WHO Chinese National Influenza Center	WHO Chinese National Influenza Center	Li Xiyan,Liu Jia, Dayan Wang
EPI_ISL_4520735	Asia / China / Guangxi	2021-08-02	B/Guangxi-Gangbei/1805/2021	WHO Chinese National Influenza Center	WHO Chinese National Influenza Center	Li Xiyan,Liu Jia, Dayan Wang
EPI_ISL_4520736	Asia / China / Guangxi	2021-08-05	B/Guangxi-Yuzhou/1901/2021	WHO Chinese National Influenza Center	WHO Chinese National Influenza Center	Li Xiyan,Liu Jia, Dayan Wang
EPI_ISL_4520737	Asia / China / Shanghai	2021-08-09	B/Shanghai-Baoshan/1633/2021	WHO Chinese National Influenza Center	WHO Chinese National Influenza Center	Li Xiyan,Liu Jia, Dayan Wang
EPI_ISL_4520738	Asia / China / Hubei	2021-08-10	B/Hubei-Maojian/11552/2021	WHO Chinese National Influenza Center	WHO Chinese National Influenza Center	Li Xiyan,Liu Jia, Dayan Wang
EPI_ISL_4520739	Asia / China / Hubei	2021-08-02	B/Hubei-Qiaokou/1555/2021	WHO Chinese National Influenza Center	WHO Chinese National Influenza Center	Li Xiyan,Liu Jia, Dayan Wang
EPI_ISL_4520743	Asia / China / Hubei	2021-08-04	B/Hubei-Danjiangkou/2355/2021	WHO Chinese National Influenza Center	WHO Chinese National Influenza Center	Li Xiyan,Liu Jia, Dayan Wang
EPI_ISL_4520744	Asia / China / Hunan	2021-08-02	B/Hunan-Lusong/1746/2021	WHO Chinese National Influenza Center	WHO Chinese National Influenza Center	Li Xiyan,Liu Jia, Dayan Wang
EPI_ISL_4520745	Asia / China / Hunan	2021-08-09	B/Hunan-Lusong/1758/2021	WHO Chinese National Influenza Center	WHO Chinese National Influenza Center	Li Xiyan,Liu Jia, Dayan Wang
EPI_ISL_4520746	Asia / China / Hunan	2021-08-02	B/Hunan-Tianyuan/1788/2021	WHO Chinese National Influenza Center	WHO Chinese National Influenza Center	Li Xiyan,Liu Jia, Dayan Wang
EPI_ISL_4520747	Asia / China / Hunan	2021-08-09	B/Hunan-Tianyuan/1821/2021	WHO Chinese National Influenza Center	WHO Chinese National Influenza Center	Li Xiyan,Liu Jia, Dayan Wang
EPI_ISL_4520748	Asia / China / Hunan	2021-08-03	B/Hunan-Kaifu/1602/2021	WHO Chinese National Influenza Center	WHO Chinese National Influenza Center	Li Xiyan,Liu Jia, Dayan Wang
EPI_ISL_4520749	Asia / China / Hunan	2021-08-09	B/Hunan-Kaifu/1628/2021	WHO Chinese National Influenza Center	WHO Chinese National Influenza Center	Li Xiyan,Liu Jia, Dayan Wang
EPI_ISL_4520750	Asia / China / Hunan	2021-08-02	B/Hunan-Suxian/1782/2021	WHO Chinese National Influenza Center	WHO Chinese National Influenza Center	Li Xiyan,Liu Jia, Dayan Wang
EPI_ISL_4520751	Asia / China / Fujian	2021-08-01	B/Fujian-Cangshan/1754/2021	WHO Chinese National Influenza Center	WHO Chinese National Influenza Center	Li Xiyan,Liu Jia, Dayan Wang
EPI_ISL_4520752	Asia / China / Fujian	2021-08-08	B/Fujian-Cangshan/1783/2021	WHO Chinese National Influenza Center	WHO Chinese National Influenza Center	Li Xiyan,Liu Jia, Dayan Wang
EPI_ISL_4520753	Asia / China / Fujian	2021-08-02	B/Fujian-Tongan/1757/2021	WHO Chinese National Influenza Center	WHO Chinese National Influenza Center	Li Xiyan,Liu Jia, Dayan Wang
EPI_ISL_4520754	Asia / China / Zhejiang	2021-08-03	B/Zhejiang-Haishu/11549/2021	WHO Chinese National Influenza Center	WHO Chinese National Influenza Center	Li Xiyan,Liu Jia, Dayan Wang
EPI_ISL_4520755	Asia / China / Zhejiang	2021-08-16	B/Zhejiang-Haishu/11626/2021	WHO Chinese National Influenza Center	WHO Chinese National Influenza Center	Li Xiyan,Liu Jia, Dayan Wang
EPI_ISL_4520756	Asia / China / Guizhou	2021-08-03	B/Guizhou-Nanming/11818/2021	WHO Chinese National Influenza Center	WHO Chinese National Influenza Center	Li Xiyan,Liu Jia, Dayan Wang
EPI_ISL_4520757	Asia / China / Chongqing	2021-08-02	B/Chongqing-Yubei/1791/2021	WHO Chinese National Influenza Center	WHO Chinese National Influenza Center	Li Xiyan,Liu Jia, Dayan Wang
EPI_ISL_4520758	Asia / China / Chongqing	2021-08-10	B/Chongqing-Yuzhong/1781/2021	WHO Chinese National Influenza Center	WHO Chinese National Influenza Center	Li Xiyan,Liu Jia, Dayan Wang
EPI_ISL_4520759	Asia / China / Chongqing	2021-08-07	B/Chongqing-Yuzhong/1785/2021	WHO Chinese National Influenza Center	WHO Chinese National Influenza Center	Li Xiyan,Liu Jia, Dayan Wang
EPI_ISL_4520760	Asia / China / Hebei	2021-08-11	B/Hebei-Hanshan/11473/2021	WHO Chinese National Influenza Center	WHO Chinese National Influenza Center	Li Xiyan,Liu Jia, Dayan Wang
EPI_ISL_4520761	Asia / China / Hebei	2021-08-04	B/Hebei-Cixian/1706/2021	WHO Chinese National Influenza Center	WHO Chinese National Influenza Center	Li Xiyan,Liu Jia, Dayan Wang
EPI_ISL_4520762	Asia / China / Hebei	2021-08-11	B/Hebei-Cixian/1729/2021	WHO Chinese National Influenza Center	WHO Chinese National Influenza Center	Li Xiyan,Liu Jia, Dayan Wang
EPI_ISL_4520763	Asia / China / Hebei	2021-08-02	B/Hebei-Luquan/1784/2021	WHO Chinese National Influenza Center	WHO Chinese National Influenza Center	Li Xiyan,Liu Jia, Dayan Wang
EPI_ISL_4520764	Asia / China / Fujian	2021-08-10	B/Fujian-Meilie/1828/2021	WHO Chinese National Influenza Center	WHO Chinese National Influenza Center	Li Xiyan,Liu Jia, Dayan Wang
EPI_ISL_4520765	Asia / China / Fujian	2021-08-02	B/Fujian-Xinluo/11615/2021	WHO Chinese National Influenza Center	WHO Chinese National Influenza Center	Li Xiyan,Liu Jia, Dayan Wang
EPI_ISL_4520766	Asia / China / Henan	2021-08-08	B/Henan-Shihe/1398/2021	WHO Chinese National Influenza Center	WHO Chinese National Influenza Center	Li Xiyan,Liu Jia, Dayan Wang
EPI_ISL_4520767	Asia / China / Henan	2021-08-12	B/Henan-Shihe/1400/2021	WHO Chinese National Influenza Center	WHO Chinese National Influenza Center	Li Xiyan,Liu Jia, Dayan Wang
EPI_ISL_4520768	Asia / China / Jiangxi	2021-08-18	B/Jiangxi-Donghu/11531/2021	WHO Chinese National Influenza Center	WHO Chinese National Influenza Center	Li Xiyan,Liu Jia, Dayan Wang
EPI_ISL_4520769	Asia / China / Jiangxi	2021-08-04	B/Jiangxi-Donghu/11455/2021	WHO Chinese National Influenza Center	WHO Chinese National Influenza Center	Li Xiyan,Liu Jia, Dayan Wang
EPI_ISL_4520770	Asia / China / Jiangxi	2021-08-11	B/Jiangxi-Xihu/1756/2021	WHO Chinese National Influenza Center	WHO Chinese National Influenza Center	Li Xiyan,Liu Jia, Dayan Wang
EPI_ISL_4520771	Asia / China / Jiangxi	2021-08-09	B/Jiangxi-Linchuan/11029/2021	WHO Chinese National Influenza Center	WHO Chinese National Influenza Center	Li Xiyan,Liu Jia, Dayan Wang
EPI_ISL_4520772	Asia / China / Jiangxi	2021-08-03	B/Jiangxi-Linchuan/1969/2021	WHO Chinese National Influenza Center	WHO Chinese National Influenza Center	Li Xiyan,Liu Jia, Dayan Wang
EPI_ISL_4520773	Asia / China / Jiangxi	2021-08-04	B/Jiangxi-Anyuan/1750/2021	WHO Chinese National Influenza Center	WHO Chinese National Influenza Center	Li Xiyan,Liu Jia, Dayan Wang
EPI_ISL_4520774	Asia / China / Jiangxi	2021-08-01	B/Jiangxi-Xunyang/1671/2021	WHO Chinese National Influenza Center	WHO Chinese National Influenza Center	Li Xiyan,Liu Jia, Dayan Wang
EPI_ISL_4520775	Asia / China / Jiangxi	2021-08-02	B/Jiangxi-Zhanggong/1767/2021	WHO Chinese National Influenza Center	WHO Chinese National Influenza Center	Li Xiyan,Liu Jia, Dayan Wang
EPI_ISL_4520776	Asia / China / Guangdong	2021-08-11	B/Guangdong-Chikan/1649/2021	WHO Chinese National Influenza Center	WHO Chinese National Influenza Center	Li Xiyan,Liu Jia, Dayan Wang
EPI_ISL_4520777	Asia / China / Hubei	2021-08-22	B/Hubei-Maojian/11629/2021	WHO Chinese National Influenza Center	WHO Chinese National Influenza Center	Li Xiyan,Liu Jia, Dayan Wang
EPI_ISL_4520779	Asia / China / Hubei	2021-08-16	B/Hubei-Danjiangkou/2380/2021	WHO Chinese National Influenza Center	WHO Chinese National Influenza Center	Li Xiyan,Liu Jia, Dayan Wang
EPI_ISL_4520780	Asia / China / Yunnan	2021-08-12	B/Yunnan-Mengzi/11055/2021	WHO Chinese National Influenza Center	WHO Chinese National Influenza Center	Li Xiyan,Liu Jia, Dayan Wang
EPI_ISL_4520781	Asia / China / Guangxi	2021-07-11	B/Guangxi-Haicheng/1566/2021	WHO Chinese National Influenza Center	WHO Chinese National Influenza Center	Li Xiyan,Liu Jia, Dayan Wang
EPI_ISL_4520783	Asia / China / Sichuan	2021-07-12	B/Sichuan-Jingyang/11550/2021	WHO Chinese National Influenza Center	WHO Chinese National Influenza Center	Li Xiyan,Liu Jia, Dayan Wang
EPI_ISL_454734	Asia / Japan	2020-01-11	B/SAITAMA-C/1/2020	Saitama City Institute of Health Science and Research	National Institute of Infectious Diseases (NIID)	Takashita,Emi;Fujisaki,Seiichiro;Shirakura,Masayuki;Watanabe,Shinji;Hasegawa,Hideki
EPI_ISL_454742	Asia / Japan	2020-03-02	B/SAPPORO/21/2020	Sapporo City Institute of Public Health	National Institute of Infectious Diseases (NIID)	Takashita,Emi;Fujisaki,Seiichiro;Shirakura,Masayuki;Watanabe,Shinji;Hasegawa,Hideki
EPI_ISL_458016	Oceania / Australia / Victoria	2020-01-10	B/Victoria/20/2020	Alfred Hospital	WHO Collaborating Centre for Reference and Research on Influenza	Deng,Y-M; Iannello,P; Lau,H; Todd,A; Spirason,N; Moselen,J; Aziz,A; Komadina,N.
EPI_ISL_467768	Europe / Finland / Etela-Suomen Laani	2020-02-20	B/Finland/197/2020	National Institute for Health and Welfare	National Institute for Health and Welfare	Ikonen, N; Haveri, A
EPI_ISL_468198	Europe / Ireland	2020-03-12	B/Ireland/25800/2020	UCD National Virus Reference Laboratory	UCD National Virus Reference Laboratory	Dunford, L.
EPI_ISL_469269	Asia / Japan	2020-03-02	B/WAKAYAMA/33/2020	Wakayama Prefectural Research Center of Environment and Public Health	National Institute of Infectious Diseases (NIID)	Takashita,Emi;Fujisaki,Seiichiro;Shirakura,Masayuki;Watanabe,Shinji;Hasegawa,Hideki
EPI_ISL_471074	Europe / United Kingdom / LEICESTER	2020-01-08	B/England/200300673/2020	Microbiology Services Colindale, Public Health England	Microbiology Services Colindale, Public Health England	NA
EPI_ISL_471651	North America / Canada	2020-03-04	B/Manitoba/RV2643/2020	National Microbiology Laboratory, Public Health Agency of Canada (PHAC)	Centers for Disease Control and Prevention	NA
EPI_ISL_471652	North America / Canada	2020-03-17	B/Ontario/RV4022/2020	National Microbiology Laboratory, Public Health Agency of Canada (PHAC)	Centers for Disease Control and Prevention	NA
EPI_ISL_471669	Europe / Russian Federation	2020-03-16	B/Astrakhan/44/2020	Russian Academy of Medical Sciences	Centers for Disease Control and Prevention	NA
EPI_ISL_471670	Europe / Russian Federation	2020-03-11	B/Astrakhan/42/2020	Russian Academy of Medical Sciences	Centers for Disease Control and Prevention	NA
EPI_ISL_471674	Europe / Russian Federation	2020-03-17	B/Krasnoyarsk/10/2020	Russian Academy of Medical Sciences	Centers for Disease Control and Prevention	NA
EPI_ISL_476006	Asia / Japan	2019-12-28	B/HIROSHIMA/20/2019	Center for Public Health and Environment, Hiroshima Prefectural Technology Research Institute	National Institute of Infectious Diseases (NIID)	Takashita,Emi;Fujisaki,Seiichiro;Shirakura,Masayuki;Watanabe,Shinji;Hasegawa,Hideki
EPI_ISL_476009	Asia / Japan	2020-02-12	B/UTSUNOMIYA/213/2020	Utsunomiya City Institute of Public Health and Environment Science	National Institute of Infectious Diseases (NIID)	Takashita,Emi;Fujisaki,Seiichiro;Shirakura,Masayuki;Watanabe,Shinji;Hasegawa,Hideki
EPI_ISL_476799	Oceania / Australia / Victoria / Prahan	2020-02-09	B/Victoria/30/2020	Alfred Hospital	WHO Collaborating Centre for Reference and Research on Influenza	Deng,Y-M; Iannello,P; Lau,H; Todd,A; Spirason,N; Moselen,J; Aziz,A; Komadina,N.
EPI_ISL_476800	Oceania / Australia / Victoria / St Kilda	2020-03-10	B/Victoria/28/2020	Alfred Hospital	WHO Collaborating Centre for Reference and Research on Influenza	Deng,Y-M; Iannello,P; Lau,H; Todd,A; Spirason,N; Moselen,J; Aziz,A; Komadina,N.
EPI_ISL_477267	South America / Argentina	2020-02-05	B/Argentina/71/2020	Instituto Nacional de Enfermedades Infecciosas	Centers for Disease Control and Prevention	NA
EPI_ISL_477269	South America / Argentina	2020-02-26	B/Argentina/82/2020	Instituto Nacional de Enfermedades Infecciosas	Centers for Disease Control and Prevention	NA
EPI_ISL_477271	South America / Argentina	2020-02-12	B/Argentina/80/2020	Instituto Nacional de Enfermedades Infecciosas	Centers for Disease Control and Prevention	NA
EPI_ISL_477355	Europe / Iceland	2020-03-17	B/Iceland/31/2020	Landspitali - University Hospital	Crick Worldwide Influenza Centre	NA
EPI_ISL_477356	Europe / Iceland	2020-03-17	B/Iceland/31/2020	Landspitali - University Hospital	Crick Worldwide Influenza Centre	NA
EPI_ISL_477357	Europe / Iceland	2020-04-20	B/Iceland/38/2020	Landspitali - University Hospital	Crick Worldwide Influenza Centre	NA
EPI_ISL_477358	Europe / Iceland	2020-04-20	B/Iceland/38/2020	Landspitali - University Hospital	Crick Worldwide Influenza Centre	NA
EPI_ISL_477363	Asia / Kyrgyzstan	2020-01-17	B/Kyrgyzstan Bishkek/36/2020	National Virology Laboratory, Center Microbiological Investigations	Crick Worldwide Influenza Centre	NA
EPI_ISL_477389	Europe / Slovenia	2020-03-17	B/Slovenia/2232/2020	Laboratory for Virology, National Institute of Public Health	Crick Worldwide Influenza Centre	NA
EPI_ISL_479652	Oceania / Australia / New South Wales / North Rocks	2020-03-09	B/Sydney/4/2020	Childrens Hospital Westmead	WHO Collaborating Centre for Reference and Research on Influenza	Deng,Y-M; Iannello,P; Lau,H; Todd,A; Spirason,N; Moselen,J; Aziz,A; Komadina,N.
EPI_ISL_479654	Oceania / Australia / Queensland / Cooktown	2019-11-21	B/Townsville/17/2019	Queensland Health Forensic and Scientific Services	WHO Collaborating Centre for Reference and Research on Influenza	Deng,Y-M; Iannello,P; Lau,H; Todd,A; Spirason,N; Moselen,J; Aziz,A; Komadina,N.
EPI_ISL_479655	Oceania / Australia / Queensland / Murarrie	2019-12-02	B/Brisbane/44/2019	Queensland Health Forensic and Scientific Services	WHO Collaborating Centre for Reference and Research on Influenza	Deng,Y-M; Iannello,P; Lau,H; Todd,A; Spirason,N; Moselen,J; Aziz,A; Komadina,N.
EPI_ISL_479656	Asia / Malaysia	2019-07-12	B/Malaysia/RP3257/2019	Institut Penyelidikan Perubatan	WHO Collaborating Centre for Reference and Research on Influenza	Deng,Y-M; Iannello,P; Lau,H; Todd,A; Spirason,N; Moselen,J; Aziz,A; Komadina,N.
EPI_ISL_480551	Europe / United Kingdom / NEWCASTLE-UPON-TYNE	2020-01-25	B/England/200580691/2020	Microbiology Services Colindale, Public Health England	Microbiology Services Colindale, Public Health England	NA
EPI_ISL_481329	Asia / Singapore	2020-01-29	B/Singapore/KK0670/2020	Ministry of Health, Singapore	Ministry of Health, Singapore	Chen,B.;Zhou, Z.; Mak,T.M.; Cui,L; Lin,R.T.P.
EPI_ISL_481331	Asia / Singapore	2020-01-28	B/Singapore/KK0623/2020	Ministry of Health, Singapore	Ministry of Health, Singapore	Chen,B.;Zhou, Z.; Mak,T.M.; Cui,L; Lin,R.T.P.
EPI_ISL_481368	Asia / Singapore	2020-01-29	B/Singapore/TT0476/2020	Ministry of Health, Singapore	Ministry of Health, Singapore	Chen,B.;Zhou, Z.; Mak,T.M.; Cui,L; Lin,R.T.P.
EPI_ISL_482917	South America / Argentina	2020-01-27	B/Argentina/66/2020	Instituto Nacional de Enfermedades Infecciosas	Centers for Disease Control and Prevention	NA
EPI_ISL_482918	South America / Argentina	2020-02-09	B/Argentina/64/2020	Instituto Nacional de Enfermedades Infecciosas	Centers for Disease Control and Prevention	NA
EPI_ISL_482925	South America / Argentina	2020-01-13	B/Argentina/43/2020	Instituto Nacional de Enfermedades Infecciosas	Centers for Disease Control and Prevention	NA
EPI_ISL_482929	South America / Argentina	2020-03-18	B/Argentina/100/2020	Instituto Nacional de Enfermedades Infecciosas	Centers for Disease Control and Prevention	NA
EPI_ISL_482934	North America / United States / Hawaii	2020-04-12	B/Hawaii/18/2020	State of Hawaii Department of Health	Centers for Disease Control and Prevention	NA
EPI_ISL_482935	North America / United States / Hawaii	2020-04-03	B/Hawaii/17/2020	State of Hawaii Department of Health	Centers for Disease Control and Prevention	NA
EPI_ISL_482936	South America / Brazil	2020-03-17	B/Rio De Janeiro/1996/2020	Instituto Oswaldo Cruz FIOCRUZ - Laboratory of Respiratory Viruses and Measles (LVRS)	Centers for Disease Control and Prevention	NA
EPI_ISL_482942	South America / Argentina	2020-02-11	B/Argentina/78/2020	Instituto Nacional de Enfermedades Infecciosas	Centers for Disease Control and Prevention	NA
EPI_ISL_485402	Asia / China / Gansu	2020-02-26	B/Gansu-Xifeng/1165/2020	WHO Chinese National Influenza Center	WHO Chinese National Influenza Center	Xiaoxu,Zeng;Xiyan,Li;Weijuan,Huang;Lei,Yang;Dayan,Wang
EPI_ISL_485403	Asia / China / Hunan	2020-03-30	B/Hunan-Heshan/1243/2020	WHO Chinese National Influenza Center	WHO Chinese National Influenza Center	Xiaoxu,Zeng;Xiyan,Li;Weijuan,Huang;Lei,Yang;Dayan,Wang
EPI_ISL_485404	Asia / China / Yunnan	2020-03-27	B/Yunnan-Hongta/1614/2020	WHO Chinese National Influenza Center	WHO Chinese National Influenza Center	Xiaoxu,Zeng;Xiyan,Li;Weijuan,Huang;Lei,Yang;Dayan,Wang
EPI_ISL_485405	Asia / China / Fujian	2020-04-22	B/Fujian-Xinluo/1714/2020	WHO Chinese National Influenza Center	WHO Chinese National Influenza Center	Xiaoxu,Zeng;Xiyan,Li;Weijuan,Huang;Lei,Yang;Dayan,Wang
EPI_ISL_485406	Asia / China	2020-03-03	B/Liaoning-Huanggu/1346/2020	WHO Chinese National Influenza Center	WHO Chinese National Influenza Center	Xiaoxu,Zeng;Xiyan,Li;Weijuan,Huang;Lei,Yang;Dayan,Wang
EPI_ISL_485413	Asia / China / Hunan	2020-01-06	B/Hunan-Daxiang/120/2020	WHO Chinese National Influenza Center	WHO Chinese National Influenza Center	Xiaoxu,Zeng;Xiyan,Li;Weijuan,Huang;Lei,Yang;Dayan,Wang
EPI_ISL_485424	Asia / China / Sichuan	2019-03-25	B/Sichuan-Jingyang/1655/2019	WHO Chinese National Influenza Center	WHO Chinese National Influenza Center	Xiaoxu,Zeng;Xiyan,Li;Weijuan,Huang;Lei,Yang;Dayan,Wang
EPI_ISL_485425	Asia / China / Guangxi	2019-05-27	B/Guangxi-Xinbin/1494/2019	WHO Chinese National Influenza Center	WHO Chinese National Influenza Center	Xiaoxu,Zeng;Xiyan,Li;Weijuan,Huang;Lei,Yang;Dayan,Wang
EPI_ISL_485426	Asia / China	2020-02-18	B/Liaoning-Shuangta/1137/2020	WHO Chinese National Influenza Center	WHO Chinese National Influenza Center	Xiaoxu,Zeng;Xiyan,Li;Weijuan,Huang;Lei,Yang;Dayan,Wang
EPI_ISL_485427	Asia / China / Jiangsu	2020-02-04	B/Jiangsu-Chongchuan/12290/2020	WHO Chinese National Influenza Center	WHO Chinese National Influenza Center	Xiaoxu,Zeng;Xiyan,Li;Weijuan,Huang;Lei,Yang;Dayan,Wang
EPI_ISL_485428	Asia / China / Yunnan	2020-02-07	B/Yunnan-Chuxiong/199/2020	WHO Chinese National Influenza Center	WHO Chinese National Influenza Center	Xiaoxu,Zeng;Xiyan,Li;Weijuan,Huang;Lei,Yang;Dayan,Wang
EPI_ISL_485429	Asia / China / Hunan	2020-02-03	B/Hunan-Heshan/1107/2020	WHO Chinese National Influenza Center	WHO Chinese National Influenza Center	Xiaoxu,Zeng;Xiyan,Li;Weijuan,Huang;Lei,Yang;Dayan,Wang
EPI_ISL_485430	Asia / China / Yunnan	2020-01-08	B/Yunnan-Gucheng/135/2020	WHO Chinese National Influenza Center	WHO Chinese National Influenza Center	Xiaoxu,Zeng;Xiyan,Li;Weijuan,Huang;Lei,Yang;Dayan,Wang
EPI_ISL_485431	Asia / China / Hunan	2020-01-14	B/Hunan-Louxin/125/2020	WHO Chinese National Influenza Center	WHO Chinese National Influenza Center	Xiaoxu,Zeng;Xiyan,Li;Weijuan,Huang;Lei,Yang;Dayan,Wang
EPI_ISL_485432	Asia / China / Sichuan	2019-12-29	B/Sichuan-Anyue/11154/2019	WHO Chinese National Influenza Center	WHO Chinese National Influenza Center	Xiaoxu,Zeng;Xiyan,Li;Weijuan,Huang;Lei,Yang;Dayan,Wang
EPI_ISL_485433	Asia / China / Shanghai	2019-12-26	B/Shanghai-Changning/11290/2019	WHO Chinese National Influenza Center	WHO Chinese National Influenza Center	Xiaoxu,Zeng;Xiyan,Li;Weijuan,Huang;Lei,Yang;Dayan,Wang
EPI_ISL_485434	Asia / China / Jiangsu	2020-02-04	B/Jiangsu-Chongchuan/12292/2020	WHO Chinese National Influenza Center	WHO Chinese National Influenza Center	Xiaoxu,Zeng;Xiyan,Li;Weijuan,Huang;Lei,Yang;Dayan,Wang
EPI_ISL_485435	Asia / China / Yunnan	2020-01-17	B/Yunnan-Qilin/163/2020	WHO Chinese National Influenza Center	WHO Chinese National Influenza Center	Xiaoxu,Zeng;Xiyan,Li;Weijuan,Huang;Lei,Yang;Dayan,Wang
EPI_ISL_485436	Asia / China / Henan	2020-01-14	B/Henan-Hubin/138/2020	WHO Chinese National Influenza Center	WHO Chinese National Influenza Center	Xiaoxu,Zeng;Xiyan,Li;Weijuan,Huang;Lei,Yang;Dayan,Wang
EPI_ISL_485437	Asia / China / Chongqing	2020-01-10	B/Chongqing-Banan/150/2020	WHO Chinese National Influenza Center	WHO Chinese National Influenza Center	Xiaoxu,Zeng;Xiyan,Li;Weijuan,Huang;Lei,Yang;Dayan,Wang
EPI_ISL_485438	Asia / China / Guizhou	2020-01-01	B/Guizhou-Xixiu/19/2020	WHO Chinese National Influenza Center	WHO Chinese National Influenza Center	Xiaoxu,Zeng;Xiyan,Li;Weijuan,Huang;Lei,Yang;Dayan,Wang
EPI_ISL_485439	Asia / China / Yunnan	2020-03-17	B/Yunnan-Wenshan/1259/2020	WHO Chinese National Influenza Center	WHO Chinese National Influenza Center	Xiaoxu,Zeng;Xiyan,Li;Weijuan,Huang;Lei,Yang;Dayan,Wang
EPI_ISL_485440	Asia / China / Guangdong	2020-03-25	B/Guangdong-Zhenjiang/1233/2020	WHO Chinese National Influenza Center	WHO Chinese National Influenza Center	Xiaoxu,Zeng;Xiyan,Li;Weijuan,Huang;Lei,Yang;Dayan,Wang
EPI_ISL_485441	Asia / China / Liaoning	2020-03-16	B/Liaoning-Xinlongtai/1205/2020	WHO Chinese National Influenza Center	WHO Chinese National Influenza Center	Xiaoxu,Zeng;Xiyan,Li;Weijuan,Huang;Lei,Yang;Dayan,Wang
EPI_ISL_485442	Asia / China / Fujian	2020-03-16	B/Fujian-Xinluo/1483/2020	WHO Chinese National Influenza Center	WHO Chinese National Influenza Center	Xiaoxu,Zeng;Xiyan,Li;Weijuan,Huang;Lei,Yang;Dayan,Wang
EPI_ISL_485443	Asia / China / Zhejiang	2020-03-03	B/Zhejiang-Yiwu/1168/2020	WHO Chinese National Influenza Center	WHO Chinese National Influenza Center	Xiaoxu,Zeng;Xiyan,Li;Weijuan,Huang;Lei,Yang;Dayan,Wang
EPI_ISL_485500	Asia / China	2019-11-18	B/Jeonnam/1343/2019	WHO Chinese National Influenza Center	WHO Chinese National Influenza Center	Xiaoxu,Zeng;Xiyan,Li;Weijuan,Huang;Lei,Yang;Dayan,Wang
EPI_ISL_485501	Asia / China	2019-11-18	B/Ulsan/1316/2019	WHO Chinese National Influenza Center	WHO Chinese National Influenza Center	Xiaoxu,Zeng;Xiyan,Li;Weijuan,Huang;Lei,Yang;Dayan,Wang
EPI_ISL_485502	Asia / China	2020-01-13	B/Macao/600389/2020	WHO Chinese National Influenza Center	WHO Chinese National Influenza Center	Xiaoxu,Zeng;Xiyan,Li;Weijuan,Huang;Lei,Yang;Dayan,Wang
EPI_ISL_485503	Asia / China	2020-01-06	B/Macao/600167/2020	WHO Chinese National Influenza Center	WHO Chinese National Influenza Center	Xiaoxu,Zeng;Xiyan,Li;Weijuan,Huang;Lei,Yang;Dayan,Wang
EPI_ISL_485504	Asia / China	2020-01-02	B/Macao/600006/2020	WHO Chinese National Influenza Center	WHO Chinese National Influenza Center	Xiaoxu,Zeng;Xiyan,Li;Weijuan,Huang;Lei,Yang;Dayan,Wang
EPI_ISL_485505	Asia / China	2019-12-18	B/Macao/609707/2019	WHO Chinese National Influenza Center	WHO Chinese National Influenza Center	Xiaoxu,Zeng;Xiyan,Li;Weijuan,Huang;Lei,Yang;Dayan,Wang
EPI_ISL_485506	Asia / China	2019-12-13	B/Macao/609541/2019	WHO Chinese National Influenza Center	WHO Chinese National Influenza Center	Xiaoxu,Zeng;Xiyan,Li;Weijuan,Huang;Lei,Yang;Dayan,Wang
EPI_ISL_485507	Asia / China	2019-09-26	B/Macao/607213/2019	WHO Chinese National Influenza Center	WHO Chinese National Influenza Center	Xiaoxu,Zeng;Xiyan,Li;Weijuan,Huang;Lei,Yang;Dayan,Wang
EPI_ISL_485508	Asia / China	2019-09-09	B/Macao/606787/2019	WHO Chinese National Influenza Center	WHO Chinese National Influenza Center	Xiaoxu,Zeng;Xiyan,Li;Weijuan,Huang;Lei,Yang;Dayan,Wang
EPI_ISL_485509	Asia / China	2019-07-31	B/Macao-/605907/2019	WHO Chinese National Influenza Center	WHO Chinese National Influenza Center	Xiaoxu,Zeng;Xiyan,Li;Weijuan,Huang;Lei,Yang;Dayan,Wang
EPI_ISL_485510	Asia / China	2019-07-16	B/Macao-/605544/2019	WHO Chinese National Influenza Center	WHO Chinese National Influenza Center	Xiaoxu,Zeng;Xiyan,Li;Weijuan,Huang;Lei,Yang;Dayan,Wang
EPI_ISL_485511	Asia / China	2019-07-01	B/Macao-/605113/2019	WHO Chinese National Influenza Center	WHO Chinese National Influenza Center	Xiaoxu,Zeng;Xiyan,Li;Weijuan,Huang;Lei,Yang;Dayan,Wang
EPI_ISL_485538	Asia / China / Tianjin	2020-01-15	B/Tianjin-Nankai/187/2020	WHO Chinese National Influenza Center	WHO Chinese National Influenza Center	Xiaoxu,Zeng;Xiyan,Li;Weijuan,Huang;Lei,Yang;Dayan,Wang
EPI_ISL_485539	Asia / China / Shandong	2020-01-06	B/Shandong-Decheng/151/2020	WHO Chinese National Influenza Center	WHO Chinese National Influenza Center	Xiaoxu,Zeng;Xiyan,Li;Weijuan,Huang;Lei,Yang;Dayan,Wang
EPI_ISL_485542	Asia / China / Fujian	2019-12-10	B/Fujian-Fuding/31/2019	WHO Chinese National Influenza Center	WHO Chinese National Influenza Center	Xiaoxu,Zeng;Xiyan,Li;Weijuan,Huang;Lei,Yang;Dayan,Wang
EPI_ISL_485543	Asia / China / Sichuan	2019-12-22	B/Sichuan-Yanjiang/11121/2019	WHO Chinese National Influenza Center	WHO Chinese National Influenza Center	Xiaoxu,Zeng;Xiyan,Li;Weijuan,Huang;Lei,Yang;Dayan,Wang
EPI_ISL_485544	Asia / China	2020-01-12	B/Shanghai-Jingan/198/2020	WHO Chinese National Influenza Center	WHO Chinese National Influenza Center	Xiaoxu,Zeng;Xiyan,Li;Weijuan,Huang;Lei,Yang;Dayan,Wang
EPI_ISL_485545	Asia / China / Zhejiang	2020-01-06	B/Zhejiang-Kecheng/114/2020	WHO Chinese National Influenza Center	WHO Chinese National Influenza Center	Xiaoxu,Zeng;Xiyan,Li;Weijuan,Huang;Lei,Yang;Dayan,Wang
EPI_ISL_485546	Asia / China / Hubei	2020-01-06	B/Hubei-Huangshigang/119/2020	WHO Chinese National Influenza Center	WHO Chinese National Influenza Center	Xiaoxu,Zeng;Xiyan,Li;Weijuan,Huang;Lei,Yang;Dayan,Wang
EPI_ISL_485547	Asia / China / Fujian	2020-01-02	B/Fujian-Xinluo/122/2020	WHO Chinese National Influenza Center	WHO Chinese National Influenza Center	Xiaoxu,Zeng;Xiyan,Li;Weijuan,Huang;Lei,Yang;Dayan,Wang
EPI_ISL_485548	Asia / China / Hebei	2020-01-07	B/Hebei-Luquan/114/2020	WHO Chinese National Influenza Center	WHO Chinese National Influenza Center	Xiaoxu,Zeng;Xiyan,Li;Weijuan,Huang;Lei,Yang;Dayan,Wang
EPI_ISL_485549	Asia / China / Henan	2020-01-06	B/Henan-Longting/113/2020	WHO Chinese National Influenza Center	WHO Chinese National Influenza Center	Xiaoxu,Zeng;Xiyan,Li;Weijuan,Huang;Lei,Yang;Dayan,Wang
EPI_ISL_485550	Asia / China / Sichuan	2020-01-01	B/Sichuan-Ziliujing/18/2020	WHO Chinese National Influenza Center	WHO Chinese National Influenza Center	Xiaoxu,Zeng;Xiyan,Li;Weijuan,Huang;Lei,Yang;Dayan,Wang
EPI_ISL_485551	Asia / China / Hubei	2020-01-02	B/Hubei-Wujiagang/12/2020	WHO Chinese National Influenza Center	WHO Chinese National Influenza Center	Xiaoxu,Zeng;Xiyan,Li;Weijuan,Huang;Lei,Yang;Dayan,Wang
EPI_ISL_485552	Asia / China / Hunan	2020-01-02	B/Hunan-Yuhu/114/2020	WHO Chinese National Influenza Center	WHO Chinese National Influenza Center	Xiaoxu,Zeng;Xiyan,Li;Weijuan,Huang;Lei,Yang;Dayan,Wang
EPI_ISL_485553	Asia / China / Zhejiang	2020-01-06	B/Zhejiang-Kecheng/114/2020	WHO Chinese National Influenza Center	WHO Chinese National Influenza Center	Xiaoxu,Zeng;Xiyan,Li;Weijuan,Huang;Lei,Yang;Dayan,Wang
EPI_ISL_485797	Europe / Finland	2020-02-20	B/Finland/197/2020	National Institute for Health and Welfare	Crick Worldwide Influenza Centre	NA
EPI_ISL_486369	Asia / Japan	2020-02-03	B/ISHIKAWA/27/2020	Ishikawa Prefectural Institute of Public Health and Environmental Science	National Institute of Infectious Diseases (NIID)	Takashita,Emi;Fujisaki,Seiichiro;Shirakura,Masayuki;Watanabe,Shinji;Hasegawa,Hideki
EPI_ISL_486370	Asia / Japan	2020-03-04	B/CHIBA-C/21/2020	Chiba City Institute of Health and Environment	National Institute of Infectious Diseases (NIID)	Takashita,Emi;Fujisaki,Seiichiro;Shirakura,Masayuki;Watanabe,Shinji;Hasegawa,Hideki
EPI_ISL_486374	Asia / Japan	2020-02-19	B/GUNMA/43/2020	Gunma Prefectural Institute of Public Health and Environmental Sciences	National Institute of Infectious Diseases (NIID)	Takashita,Emi;Fujisaki,Seiichiro;Shirakura,Masayuki;Watanabe,Shinji;Hasegawa,Hideki
EPI_ISL_486379	Asia / Japan	2020-03-02	B/MIYAGI/1/2020	Miyagi Prefectural Institute of Public Health and Environment	National Institute of Infectious Diseases (NIID)	Takashita,Emi;Fujisaki,Seiichiro;Shirakura,Masayuki;Watanabe,Shinji;Hasegawa,Hideki
EPI_ISL_486631	Europe / Austria / Vienna	2020-03-02	B/Austria/1229377/2020	Department of Virology, Medical University Vienna	Medical University Vienna	Redlberger-Fritz, M.
EPI_ISL_486633	Europe / Austria / Styria	2020-03-02	B/Austria/1229395/2020	Department of Virology, Medical University Vienna	Medical University Vienna	Redlberger-Fritz, M.
EPI_ISL_486786	Europe / Finland	2020-02-20	B/Finland/197/2020	National Institute for Health and Welfare	Crick Worldwide Influenza Centre	NA
EPI_ISL_486953	Europe / Norway / Rogaland	2020-03-17	B/Norway/2192/2020	Stavanger Universitetssykehus, Avd. for Medisinsk Mikrobiologi	Norwegian Institute of Public Health	Bragstad, K; Hungnes, O
EPI_ISL_486981	Europe / Norway / Oslo	2020-03-26	B/Norway/2340/2020	Oslo University Hospital, Ulleval Hospital, Dept. of Microbiology	Norwegian Institute of Public Health	Bragstad, K; Hungnes, O
EPI_ISL_486984	Europe / Norway	2020-04-06	B/Norway/2384/2020	Stavanger Universitetssykehus, Avd. for Medisinsk Mikrobiologi	Norwegian Institute of Public Health	Bragstad, K; Hungnes, O
EPI_ISL_487164	Europe / Luxembourg	2020-02-18	B/Luxembourg/LNS2168742/2020	Laboratoire National de Sant√©	Laboratoire National de Sant√©	Wienecke-Baldacchino, Anke; Fournier, Guillaume; Ragimbeau, Catherine
EPI_ISL_487190	Europe / Luxembourg	2020-02-13	B/Luxembourg/LNS7874225/2020	Laboratoire National de Sant√©	Laboratoire National de Sant√©	Wienecke-Baldacchino, Anke; Fournier, Guillaume; Ragimbeau, Catherine
EPI_ISL_487506	South America / Guyana	2020-03-02	B/Guyane/336/2020	National Influenza Center French Guiana and French Indies	Centers for Disease Control and Prevention	NA
EPI_ISL_487507	South America / Argentina	2020-03-02	B/Argentina/84/2020	Instituto Nacional de Enfermedades Infecciosas	Centers for Disease Control and Prevention	NA
EPI_ISL_487509	South America / Guyana	2020-02-27	B/Guyane/310/2020	National Influenza Center French Guiana and French Indies	Centers for Disease Control and Prevention	NA
EPI_ISL_487510	South America / Guyana	2020-03-04	B/Guyane/354/2020	National Influenza Center French Guiana and French Indies	Centers for Disease Control and Prevention	NA
EPI_ISL_487513	South America / Argentina	2020-02-03	B/Argentina/88/2020	Instituto Nacional de Enfermedades Infecciosas	Centers for Disease Control and Prevention	NA
EPI_ISL_487514	South America / Argentina	2020-03-04	B/Argentina/87/2020	Instituto Nacional de Enfermedades Infecciosas	Centers for Disease Control and Prevention	NA
EPI_ISL_487516	Europe / Ukraine	2020-03-04	B/Kyiv/342/2020	Institute of Epidemiology and Infectious Diseases AMS of Ukraine	Centers for Disease Control and Prevention	NA
EPI_ISL_487519	South America / Argentina	2020-02-27	B/Argentina/83/2020	Instituto Nacional de Enfermedades Infecciosas	Centers for Disease Control and Prevention	NA
EPI_ISL_491483	Asia / Bangladesh	2019-06-23	B/Bangladesh/3038/2019	icddr,b International Centre for Diarrhoeal Disease Research, Bangladesh	Centers for Disease Control and Prevention	NA
EPI_ISL_491846	Asia / Bhutan	2019-08-15	B/Bhutan/633/2019	Royal Centre for Disease Control	Centers for Disease Control and Prevention	NA
EPI_ISL_491851	South America / Argentina	2020-01-02	B/Argentina/25/2020	Instituto Nacional de Enfermedades Infecciosas	Centers for Disease Control and Prevention	NA
EPI_ISL_491858	Asia / Bangladesh	2019-11-09	B/Bangladesh/497/2019	Institute of Epidemiology Disease Control and Research (IEDCR) & Bangladesh National Influenza Centre (NIC)	Centers for Disease Control and Prevention	NA
EPI_ISL_491859	Asia / Bangladesh	2019-11-09	B/Bangladesh/496/2019	Institute of Epidemiology Disease Control and Research (IEDCR) & Bangladesh National Influenza Centre (NIC)	Centers for Disease Control and Prevention	NA
EPI_ISL_491862	Africa / Togo	2019-11-04	B/Togo/1646/2019	Institute National D'Hygiene	Centers for Disease Control and Prevention	NA
EPI_ISL_491886	Africa / Congo, the Democatic Republic of	2019-12-30	B/Congo/9788/2019	INRB Service de Virologie	Centers for Disease Control and Prevention	NA
EPI_ISL_491890	Asia / Bhutan	2019-08-01	B/Bhutan/123/2019	Royal Centre for Disease Control	Centers for Disease Control and Prevention	NA
EPI_ISL_491897	Asia / Bhutan	2019-07-24	B/Bhutan/1448/2019	Royal Centre for Disease Control	Centers for Disease Control and Prevention	NA
EPI_ISL_491904	South America / Argentina	2020-02-21	B/Argentina/77/2020	Instituto Nacional de Enfermedades Infecciosas	Centers for Disease Control and Prevention	NA
EPI_ISL_493193	Africa / South Africa / Province of the Western Cape	2020-02-05	B/South Africa/1219/2020	National Institute for Communicable Disease	WHO Collaborating Centre for Reference and Research on Influenza	Deng,Y-M; Iannello,P; Lau,H; Todd,A; Spirason,N; Moselen,J; Aziz,A; Komadina,N.
EPI_ISL_493195	Oceania / Australia / Port Sorell	2020-02-01	B/Tasmania/501/2020	Hobart Pathology	WHO Collaborating Centre for Reference and Research on Influenza	Deng,Y-M; Iannello,P; Lau,H; Todd,A; Spirason,N; Moselen,J; Aziz,A; Komadina,N.
EPI_ISL_493196	Oceania / Australia / Turners Beach	2020-01-27	B/Tasmania/500/2020	Hobart Pathology	WHO Collaborating Centre for Reference and Research on Influenza	Deng,Y-M; Iannello,P; Lau,H; Todd,A; Spirason,N; Moselen,J; Aziz,A; Komadina,N.
EPI_ISL_496597	Asia / Japan	2020-03-31	B/Japan/12213/2020	U.S. Air Force School of Aerospace Medicine	U.S. Air Force School of Aerospace Medicine	Gruner, W.E., Fries, A.C., Garrett, C.M., Powell, M.L., Hanson, J.F., DeMarcus, L.S., Sjoberg, P.A., Bogue, A.L., Robbins, A.S., Macias, E.A., Lambert, A.W., Dane, D.J.
EPI_ISL_498207	Asia / Japan	2020-01-06	B/SAPPORO/1/2020	Sapporo City Institute of Public Health	National Institute of Infectious Diseases (NIID)	Takashita,Emi;Fujisaki,Seiichiro;Shirakura,Masayuki;Watanabe,Shinji;Hasegawa,Hideki
EPI_ISL_498460	Africa / South Africa	2020-02-12	B/South Africa/1632/2020	National Institute for Communicable Disease	Crick Worldwide Influenza Centre	NA
EPI_ISL_498461	Africa / South Africa	2020-02-13	B/South Africa/1739/2020	National Institute for Communicable Disease	Crick Worldwide Influenza Centre	NA
EPI_ISL_498462	Africa / South Africa	2020-02-18	B/South Africa/1920/2020	National Institute for Communicable Disease	Crick Worldwide Influenza Centre	NA
EPI_ISL_498464	Africa / South Africa	2020-03-23	B/South Africa/6204/2020	National Institute for Communicable Disease	Crick Worldwide Influenza Centre	NA
EPI_ISL_499065	South America / Chile	2020-03-19	B/Talca/30403/2020	Instituto de Salud Publica de Chile	Centers for Disease Control and Prevention	NA
EPI_ISL_499069	South America / Chile	2020-01-11	B/Santiago/4824/2020	Instituto de Salud Publica de Chile	Centers for Disease Control and Prevention	NA
EPI_ISL_499070	South America / Chile	2020-03-09	B/Santiago/22802/2020	Instituto de Salud Publica de Chile	Centers for Disease Control and Prevention	NA
EPI_ISL_499073	South America / Chile	2020-01-06	B/Santiago/7002/2020	Instituto de Salud Publica de Chile	Centers for Disease Control and Prevention	NA
EPI_ISL_499078	South America / Chile	2020-01-07	B/Santiago/1228/2020	Instituto de Salud Publica de Chile	Centers for Disease Control and Prevention	NA
EPI_ISL_499080	South America / Chile	2020-01-06	B/Santiago/2520/2020	Instituto de Salud Publica de Chile	Centers for Disease Control and Prevention	NA
EPI_ISL_500490	Asia / Japan	2020-02-25	B/UTSUNOMIYA/247/2020	Utsunomiya City Institute of Public Health and Environment Science	National Institute of Infectious Diseases (NIID)	Takashita,Emi;Fujisaki,Seiichiro;Shirakura,Masayuki;Watanabe,Shinji;Hasegawa,Hideki
EPI_ISL_500492	Asia / Japan	2020-02-17	B/KAGAWA/20111/2020	Kagawa Prefectural Research Institute for Environmental Sciences and Public Health	National Institute of Infectious Diseases (NIID)	Takashita,Emi;Fujisaki,Seiichiro;Shirakura,Masayuki;Watanabe,Shinji;Hasegawa,Hideki
EPI_ISL_500494	Asia / Japan	2020-02-17	B/SAPPORO/16/2020	Sapporo City Institute of Public Health	National Institute of Infectious Diseases (NIID)	Takashita,Emi;Fujisaki,Seiichiro;Shirakura,Masayuki;Watanabe,Shinji;Hasegawa,Hideki
EPI_ISL_500497	Asia / Japan	2020-03-01	B/NIIGATA-C/21/2020	Niigata City Institute of Public Health and Environment	National Institute of Infectious Diseases (NIID)	Takashita,Emi;Fujisaki,Seiichiro;Shirakura,Masayuki;Watanabe,Shinji;Hasegawa,Hideki
EPI_ISL_500498	Asia / Japan	2020-02-28	B/HAMAMATU-C/16/2020	Hamamatsu City Health Environment Research Center	National Institute of Infectious Diseases (NIID)	Takashita,Emi;Fujisaki,Seiichiro;Shirakura,Masayuki;Watanabe,Shinji;Hasegawa,Hideki
EPI_ISL_500766	Europe / Macedonia, the former Yogoslav Republic of	2020-03-06	B/Macedonia/713/2020	Institute of Public Health (Macedonia)	Crick Worldwide Influenza Centre	NA
EPI_ISL_509217	Oceania / Australia / Queensland / Carina Heights	2020-02-26	B/Brisbane/6B/2020	Queensland Health Forensic and Scientific Services	WHO Collaborating Centre for Reference and Research on Influenza	Deng,Y-M; Iannello,P; Lau,H; Todd,A; Spirason,N; Moselen,J; Aziz,A; Komadina,N.
EPI_ISL_509218	Oceania / Australia / Queensland / Greenslopes	2020-02-22	B/Brisbane/4/2020	Queensland Health Forensic and Scientific Services	WHO Collaborating Centre for Reference and Research on Influenza	Deng,Y-M; Iannello,P; Lau,H; Todd,A; Spirason,N; Moselen,J; Aziz,A; Komadina,N.
EPI_ISL_509219	Oceania / Australia / Queensland / Image Flat	2020-02-08	B/Brisbane/2/2020	Queensland Health Forensic and Scientific Services	WHO Collaborating Centre for Reference and Research on Influenza	Deng,Y-M; Iannello,P; Lau,H; Todd,A; Spirason,N; Moselen,J; Aziz,A; Komadina,N.
EPI_ISL_509220	Africa / South Africa / Province of the Western Cape	2020-02-17	B/South Africa/1921/2020	National Institute for Communicable Disease	WHO Collaborating Centre for Reference and Research on Influenza	Deng,Y-M; Iannello,P; Lau,H; Todd,A; Spirason,N; Moselen,J; Aziz,A; Komadina,N.
EPI_ISL_509999	Oceania / Australia / Rochedale	2020-03-02	B/Brisbane/5/2020	Queensland Health Forensic and Scientific Services	WHO Collaborating Centre for Reference and Research on Influenza	Deng,Y-M; Iannello,P; Lau,H; Todd,A; Spirason,N; Moselen,J; Aziz,A; Komadina,N.
EPI_ISL_510001	Africa / South Africa / Province of the Western Cape	2020-03-09	B/South Africa/3623/2020	National Institute for Communicable Disease	WHO Collaborating Centre for Reference and Research on Influenza	Deng,Y-M; Iannello,P; Lau,H; Todd,A; Spirason,N; Moselen,J; Aziz,A; Komadina,N.
EPI_ISL_510002	Africa / South Africa / Province of the Western Cape	2020-03-09	B/South Africa/3636/2020	National Institute for Communicable Disease	WHO Collaborating Centre for Reference and Research on Influenza	Deng,Y-M; Iannello,P; Lau,H; Todd,A; Spirason,N; Moselen,J; Aziz,A; Komadina,N.
EPI_ISL_510009	Asia / Philippines / City of Manila / Manila City	2020-01-21	B/Philippines/5/2020	Research Institute of Tropical Medicine	WHO Collaborating Centre for Reference and Research on Influenza	Deng,Y-M; Iannello,P; Lau,H; Todd,A; Spirason,N; Moselen,J; Aziz,A; Komadina,N.
EPI_ISL_510010	Asia / Philippines / Province of Benguet / Baguio	2020-01-20	B/Philippines/4/2020	Research Institute of Tropical Medicine	WHO Collaborating Centre for Reference and Research on Influenza	Deng,Y-M; Iannello,P; Lau,H; Todd,A; Spirason,N; Moselen,J; Aziz,A; Komadina,N.
EPI_ISL_512129	Europe / Macedonia, the former Yogoslav Republic of	2020-02-05	B/Macedonia/421/2020	Institute of Public Health (Macedonia)	Centers for Disease Control and Prevention	NA
EPI_ISL_512689	Oceania / Australia / South Australia / North Adelaide	2019-12-04	B/South Australia/159/2019	Institute of Medical and Veterinary Science (IMVS)	WHO Collaborating Centre for Reference and Research on Influenza	Soppe,S; Rynehart, C; Peck,H; Aziz,A; Komadina,N
EPI_ISL_512691	Oceania / Australia / Australian Capital Territory / Ngunnawal	2020-01-25	B/Canberra/3/2020	Canberra Hospital	WHO Collaborating Centre for Reference and Research on Influenza	Soppe,S; Rynehart, C; Peck,H; Aziz,A; Komadina,N
EPI_ISL_512693	Oceania / Australia / South Australia / North Adelaide	2020-02-04	B/South Australia/7/2020	Institute of Medical and Veterinary Science (IMVS)	WHO Collaborating Centre for Reference and Research on Influenza	Soppe,S; Rynehart, C; Peck,H; Aziz,A; Komadina,N
EPI_ISL_512695	Oceania / Australia / Queensland / Mackay	2020-01-05	B/Townsville/1/2020	Queensland Health Forensic and Scientific Services	WHO Collaborating Centre for Reference and Research on Influenza	Soppe,S; Rynehart, C; Peck,H; Aziz,A; Komadina,N
EPI_ISL_513929	Asia / Japan	2020-04-01	B/AICHI/58/2020	Aichi Prefectural Institute of Public Health	National Institute of Infectious Diseases (NIID)	Takashita,Emi;Fujisaki,Seiichiro;Shirakura,Masayuki;Watanabe,Shinji;Hasegawa,Hideki
EPI_ISL_513930	Asia / Japan	2020-04-03	B/OSAKA/31/2020	Osaka Prefectural Institute of Public Health	National Institute of Infectious Diseases (NIID)	Takashita,Emi;Fujisaki,Seiichiro;Shirakura,Masayuki;Watanabe,Shinji;Hasegawa,Hideki
EPI_ISL_517736	Europe / Russian Federation	2020-02-27	B/Moscow/40/2020	Ivanovsky Research Institute of Virology RAMS	Centers for Disease Control and Prevention	NA
EPI_ISL_517737	North America / Haiti	2020-04-01	B/Haiti/488/2020	Laboratoire National de Sante Publique	Centers for Disease Control and Prevention	NA
EPI_ISL_517738	North America / Haiti	2020-04-01	B/Haiti/432/2020	Laboratoire National de Sante Publique	Centers for Disease Control and Prevention	NA
EPI_ISL_517745	South America / Brazil	2020-03-10	B/Brazil/4648/2020	Instituto Adolfo Lutz	Centers for Disease Control and Prevention	NA
EPI_ISL_517746	Europe / Russian Federation	2020-02-28	B/Moscow/38/2020	Ivanovsky Research Institute of Virology RAMS	Centers for Disease Control and Prevention	NA
EPI_ISL_517752	Asia / Japan	2020-01-08	B/Yokohama/1/2020	National Institute of Infectious Diseases (NIID)	Centers for Disease Control and Prevention	NA
EPI_ISL_517753	South America / Brazil	2020-03-15	B/Brazil/4567/2020	Instituto Adolfo Lutz	Centers for Disease Control and Prevention	NA
EPI_ISL_517758	South America / Brazil	2020-02-07	B/Brazil/6517/2020	Instituto Adolfo Lutz	Centers for Disease Control and Prevention	NA
EPI_ISL_522410	Asia / China / Fujian	2020-03-17	B/Fujian-Xinluo/1487/2020	WHO Chinese National Influenza Center	WHO Chinese National Influenza Center	Xin li,Li Xiyan, Dayan Wang, Zeng Xiaoxu
EPI_ISL_522411	Asia / China / Fujian	2020-03-17	B/Fujian-Xinluo/1487/2020	WHO Chinese National Influenza Center	WHO Chinese National Influenza Center	Xin li,Li Xiyan, Dayan Wang, Zeng Xiaoxu
EPI_ISL_522412	Asia / China / Yunnan	2020-06-09	B/Yunnan-Wenshan/1479/2020	WHO Chinese National Influenza Center	WHO Chinese National Influenza Center	Xin li,Li Xiyan, Dayan Wang, Zeng Xiaoxu
EPI_ISL_522413	Asia / China / Fujian	2020-04-22	B/Fujian-Xinluo/1719/2020	WHO Chinese National Influenza Center	WHO Chinese National Influenza Center	Xin li,Li Xiyan, Dayan Wang, Zeng Xiaoxu
EPI_ISL_522414	Asia / China / Yunnan	2020-05-12	B/Yunnan-Wenshan/1436/2020	WHO Chinese National Influenza Center	WHO Chinese National Influenza Center	Xin li,Li Xiyan, Dayan Wang, Zeng Xiaoxu
EPI_ISL_522415	Asia / China / Yunnan	2020-05-12	B/Yunnan-Wenshan/1438/2020	WHO Chinese National Influenza Center	WHO Chinese National Influenza Center	Xin li,Li Xiyan, Dayan Wang, Zeng Xiaoxu
EPI_ISL_522416	Asia / China / Fujian	2020-04-15	B/Fujian-Xinluo/1675/2020	WHO Chinese National Influenza Center	WHO Chinese National Influenza Center	Xin li,Li Xiyan, Dayan Wang, Zeng Xiaoxu
EPI_ISL_522417	Asia / China / Fujian	2020-04-22	B/Fujian-Xinluo/1719/2020	WHO Chinese National Influenza Center	WHO Chinese National Influenza Center	Xin li,Li Xiyan, Dayan Wang, Zeng Xiaoxu
EPI_ISL_523813	Asia / Japan	2020-03-11	B/AKITA/3/2020	Akita Research Center for Public Health and Environment	National Institute of Infectious Diseases (NIID)	Takashita,Emi;Fujisaki,Seiichiro;Shirakura,Masayuki;Watanabe,Shinji;Hasegawa,Hideki
EPI_ISL_523815	Asia / Japan	2020-02-26	B/KYOTO-C/4/2020	Kyoto City Institute of Health and Environmental Sciences	National Institute of Infectious Diseases (NIID)	Takashita,Emi;Fujisaki,Seiichiro;Shirakura,Masayuki;Watanabe,Shinji;Hasegawa,Hideki
EPI_ISL_523816	Asia / Japan	2020-03-05	B/OSAKA/30/2020	Osaka Prefectural Institute of Public Health	National Institute of Infectious Diseases (NIID)	Takashita,Emi;Fujisaki,Seiichiro;Shirakura,Masayuki;Watanabe,Shinji;Hasegawa,Hideki
EPI_ISL_525480	Asia / Myanmar / Yangon Division	2020-07-26	B/Myanmar/19M105/2019	Niigata University (DPH)	Niiigata University	NA
EPI_ISL_527300	Europe / Ireland	2020-03-12	B/Ireland/25800/2020	UCD National Virus Reference Laboratory	Crick Worldwide Influenza Centre	NA
EPI_ISL_527316	Europe / Norway	2020-03-17	B/Norway/2192/2020	WHO National Influenza Centre	Crick Worldwide Influenza Centre	NA
EPI_ISL_527321	Europe / Norway	2020-03-26	B/Norway/2340/2020	WHO National Influenza Centre	Crick Worldwide Influenza Centre	NA
EPI_ISL_528784	Oceania / New Caledonia / South Province	2020-02-15	B/New Caledonia/1/2020	Institut Pasteur New Caledonia	WHO Collaborating Centre for Reference and Research on Influenza	Deng,Y-M; Iannello,P; Lau,H; Todd,A; Spirason,N; Moselen,J; Aziz,A; Komadina,N.
EPI_ISL_528786	Oceania / New Zealand / Canterbury / Christchurch	2020-03-02	B/Christchurch/501/2020	Canterbury Health Services	WHO Collaborating Centre for Reference and Research on Influenza	Deng,Y-M; Iannello,P; Lau,H; Todd,A; Spirason,N; Moselen,J; Aziz,A; Komadina,N.
EPI_ISL_528787	Asia / Cambodia / Oddor Mean Chey	2020-01-20	B/Cambodia/e0130368/2020	Institute Pasteur du Cambodia	WHO Collaborating Centre for Reference and Research on Influenza	Deng,Y-M; Iannello,P; Lau,H; Todd,A; Spirason,N; Moselen,J; Aziz,A; Komadina,N.
EPI_ISL_528915	Africa / Kenya	2020-03-11	B/Kenya/111/2020	CDC-Kenya	Centers for Disease Control and Prevention	NA
EPI_ISL_528918	Asia / China	2020-01-06	B/Hunan-Daxaing/120/2020	WHO Chinese National Influenza Center	Centers for Disease Control and Prevention	NA
EPI_ISL_529109	Africa / South Africa / Province of the Western Cape	2020-02-17	B/South Africa/1921/2020	National Institute for Communicable Disease	WHO Collaborating Centre for Reference and Research on Influenza	Deng,Y-M; Iannello,P; Lau,H; Todd,A; Spirason,N; Moselen,J; Aziz,A; Komadina,N.
EPI_ISL_529137	Asia / Sri Lanka / Colombo	2020-02-21	B/Sri Lanka/32/2020	Medical Research Institute	WHO Collaborating Centre for Reference and Research on Influenza	Deng,Y-M; Iannello,P; Lau,H; Todd,A; Spirason,N; Moselen,J; Aziz,A; Komadina,N.
EPI_ISL_5332907	Asia / China	2021-02-17	B/Henan-Xigong/1118/2021	WHO Chinese National Influenza Center	Centers for Disease Control and Prevention	NA
EPI_ISL_534092	Asia / India	2020-01-20	B/Anantnag/AG_486/2020	Sher-i-Kashmir Institute of Medical Sciences	CNR Virus des Infections Respiratoires - France SUD	NA
EPI_ISL_534097	Asia / India	2020-02-03	B/Anantnag/AG_644/2020	Sher-i-Kashmir Institute of Medical Sciences	CNR Virus des Infections Respiratoires - France SUD	NA
EPI_ISL_534107	Asia / India	2020-02-04	B/Baramulla/AG_654/2020	Sher-i-Kashmir Institute of Medical Sciences	CNR Virus des Infections Respiratoires - France SUD	NA
EPI_ISL_534108	Asia / India	2020-01-30	B/Baramulla/UG_69/2020	Sher-i-Kashmir Institute of Medical Sciences	CNR Virus des Infections Respiratoires - France SUD	NA
EPI_ISL_534109	Asia / India	2019-11-21	B/Budgam/AG_122/2019	Sher-i-Kashmir Institute of Medical Sciences	CNR Virus des Infections Respiratoires - France SUD	NA
EPI_ISL_534113	Asia / India	2020-02-04	B/Doda/AG_656/2020	Sher-i-Kashmir Institute of Medical Sciences	CNR Virus des Infections Respiratoires - France SUD	NA
EPI_ISL_534114	Asia / India	2019-12-26	B/Ganderbal/AG_284/2019	Sher-i-Kashmir Institute of Medical Sciences	CNR Virus des Infections Respiratoires - France SUD	NA
EPI_ISL_534117	Asia / India	2020-01-16	B/Ganderbal/AG_449/2020	Sher-i-Kashmir Institute of Medical Sciences	CNR Virus des Infections Respiratoires - France SUD	NA
EPI_ISL_534123	Asia / India	2019-11-11	B/Ganderbal/AG_76/2019	Sher-i-Kashmir Institute of Medical Sciences	CNR Virus des Infections Respiratoires - France SUD	NA
EPI_ISL_534129	Asia / India	2019-12-02	B/Kupwara/UG_28/2019	Sher-i-Kashmir Institute of Medical Sciences	CNR Virus des Infections Respiratoires - France SUD	NA
EPI_ISL_534130	Asia / India	2020-01-14	B/Kupwara/UG_53/2020	Sher-i-Kashmir Institute of Medical Sciences	CNR Virus des Infections Respiratoires - France SUD	NA
EPI_ISL_534131	Europe / Ukraine	2019-10-01	B/Kyiv/277/2019	Institute of Epidemiology and Infectious Diseases AMS of Ukraine	CNR Virus des Infections Respiratoires - France SUD	NA
EPI_ISL_534139	Europe / France	2020-02-06	B/Lyon/CHU_0235543/2020	CNR Virus des Infections Respiratoires - France SUD	CNR Virus des Infections Respiratoires - France SUD	NA
EPI_ISL_534158	Asia / India	2019-12-05	B/Pulwama/AG_178/2019	Sher-i-Kashmir Institute of Medical Sciences	CNR Virus des Infections Respiratoires - France SUD	NA
EPI_ISL_534162	Asia / India	2020-02-03	B/Pulwama/UG_73/2020	Sher-i-Kashmir Institute of Medical Sciences	CNR Virus des Infections Respiratoires - France SUD	NA
EPI_ISL_534305	Africa / South Africa / Province of the Western Cape	2020-02-17	B/South Africa/1921/2020	National Institute for Communicable Disease	WHO Collaborating Centre for Reference and Research on Influenza	Deng,Y-M; Iannello,P; Lau,H; Todd,A; Spirason,N; Moselen,J; Aziz,A; Komadina,N.
EPI_ISL_534306	Oceania / Australia / Victoria / St Kilda	2020-03-10	B/Victoria/28/2020	Alfred Hospital	WHO Collaborating Centre for Reference and Research on Influenza	Deng,Y-M; Iannello,P; Lau,H; Todd,A; Spirason,N; Moselen,J; Aziz,A; Komadina,N.
EPI_ISL_534307	Oceania / Australia / Victoria / Port Melbourne	2020-01-27	B/Victoria/15/2020	Alfred Hospital	WHO Collaborating Centre for Reference and Research on Influenza	Deng,Y-M; Iannello,P; Lau,H; Todd,A; Spirason,N; Moselen,J; Aziz,A; Komadina,N.
[truncated: 307 more rows]
