# Supplementary material for: Genomic epidemiology of influenza B circulation in China during prolonged border closure from 2020 to 2021
Source: Research Square preprint supplement (doi:10.21203/rs.3.rs-1432770/v1), 2022-03-09
Supplement: Supplementary file 3 [file ecd215a543fac9c87fbceb01.xlsx]

## Sheet: Temporal signal (Treetime)
clade	segment	clock.rate	r.squared
3a1	PB2	1.065e-03 +/- 4.01e-04	0.11
3a1	PB1	7.368e-04 +/- 3.96e-04	0.1
3a1	PA	1.114e-03 +/- 4.26e-04	0.16
3a1	HA	1.250e-03 +/- 5.59e-04	0.24
3a1	NP	1.281e-03 +/- 5.31e-04	0.18
3a1	NA	1.227e-03 +/- 6.23e-04	0.1
3a1	MP	1.122e-03 +/- 8.47e-04	0.14
3a1	NS	9.131e-04 +/- 8.60e-04	0.03
3a1	all	1.310e-03 +/- 9.34e-05	0.56
3a2	PB2	1.447e-03 +/- 5.08e-04	0.31
3a2	PB1	1.241e-03 +/- 5.18e-04	0.15
3a2	PA	1.250e-03 +/- 5.54e-04	0.09
3a2	HA	1.338e-03 +/- 7.15e-04	0.15
3a2	NP	1.046e-03 +/- 7.01e-04	0.13
3a2	NA	1.001e-03 +/- 8.37e-04	0.03
3a2	MP	1.465e-03 +/- 1.06e-03	0.11
3a2	NS	8.317e-04 +/- 1.11e-03	0.04
3a2	all	1.472e-03 +/- 1.33e-04	0.45
V1A.3-China	PB2	7.082e-04 +/- 3.81e-04	0.19
V1A.3-China	PB1	2.064e-04 +/- 3.58e-04	0.02
V1A.3-China	PA	5.364e-04 +/- 3.92e-04	0.12
V1A.3-China	HA	7.643e-04 +/- 3.56e-04	0.29
V1A.3-China	NP	1.838e-04 +/- 4.74e-04	0.01
V1A.3-China	NA	4.230e-04 +/- 4.19e-04	0.09
V1A.3-China	MP	9.174e-04 +/- 5.37e-04	0.06
V1A.3-China	NS	3.439e-04 +/- 7.72e-04	0.05
V1A.3-China	all	6.811e-04 +/- 9.87e-05	0.3

## Sheet: Date estimation (BEAST)
Clade	TMRCA (95% Highest Posterior Density Interval)	Clock rate (95% Highest Posterior Density Interval)	Colescent model	Software
3a1 (whole genome)	2020-06-25 (2020-06-12 to 2020-07-07)	1.4194E-3 [1.2984E-3, 1.5412E-3]	GMRF Bayesian Skyride	BEAST
	2020-05-31 (2020-04-28 to 2020-06-29)	1.57E-3 [1.4539E-3, 1.6875E-3]	BDSKY	BEAST2
3a2 (whole genome)	2020-09-18 (2020-08-20 to 2020-10-14)	1.6557E-3 [1.4561E-3, 1.8691E-3]	GMRF Bayesian Skyride	BEAST
	2020-10-12 (2020-09-26 to 2020-11-03)	1.85E-3 [1.6588E-3, 2.0499E-3]	BDSKY	BEAST2
V1A.3-China (whole genome)	2017-04-12 (2016-05-12 to 2018-01-15)	5.4931E-4 [3.6547E-4, 7.3662E-4]	GMRF Bayesian Skyride	BEAST
	2018-08-23 (2018-01-15 to 2018-12-23)	1.44E-3 [1.1328E-3, 1.7665E-3]	BDSKY	BEAST2
